# Supplementary material for: Regioselective synthesis of dipyrrolopyrazine (DPP) derivatives via metal free and metal catalyzed amination and investigation of their optical and thermal properties
Source: Royal Society of Chemistry journal article supplement (doi:10.1039/c7ra01795b), 2017-01-01
Supplement: c7ra01795b1.pdf [file c7ra01795b1.pdf]

## Supporting Information

# Regioselective Synthesis of Dipyrrolopyrazine (DPP) Derivatives via Metal Free and Metal Catalyzed Amination and Investigation of Their Optical Thermal Properties

Puttavva Meti, Eun-Sil Lee, Jung-Won Yang and Young-Dae Gong\*

*Innovative Drug Library Research Center, Department of Chemistry, College of Science, Dongguk University, 26, 3-ga, Pil-dong, Jung-gu, Seoul 04620, Korea*

---

## Contents

1.  $^1\text{H}$  NMR and  $^{13}\text{C}$  NMR spectra of 1,7-DPP derivatives .....S1-S26
2.  $^1\text{H}$  NMR and  $^{13}\text{C}$  NMR spectra of 1,5-DPP derivatives.....S27- S47
3.  $^1\text{H}$  NMR and  $^{13}\text{C}$  NMR spectra of pyrrolothienopyrazine derivatives.....S48- S49
4. LC/MS and HRMS spectra of compounds .....S52-S106
5. Single crystal XRD data of compound **6f**.....S107-S114

# <sup>1</sup>H NMR and <sup>13</sup>C NMR Spectra of Compounds

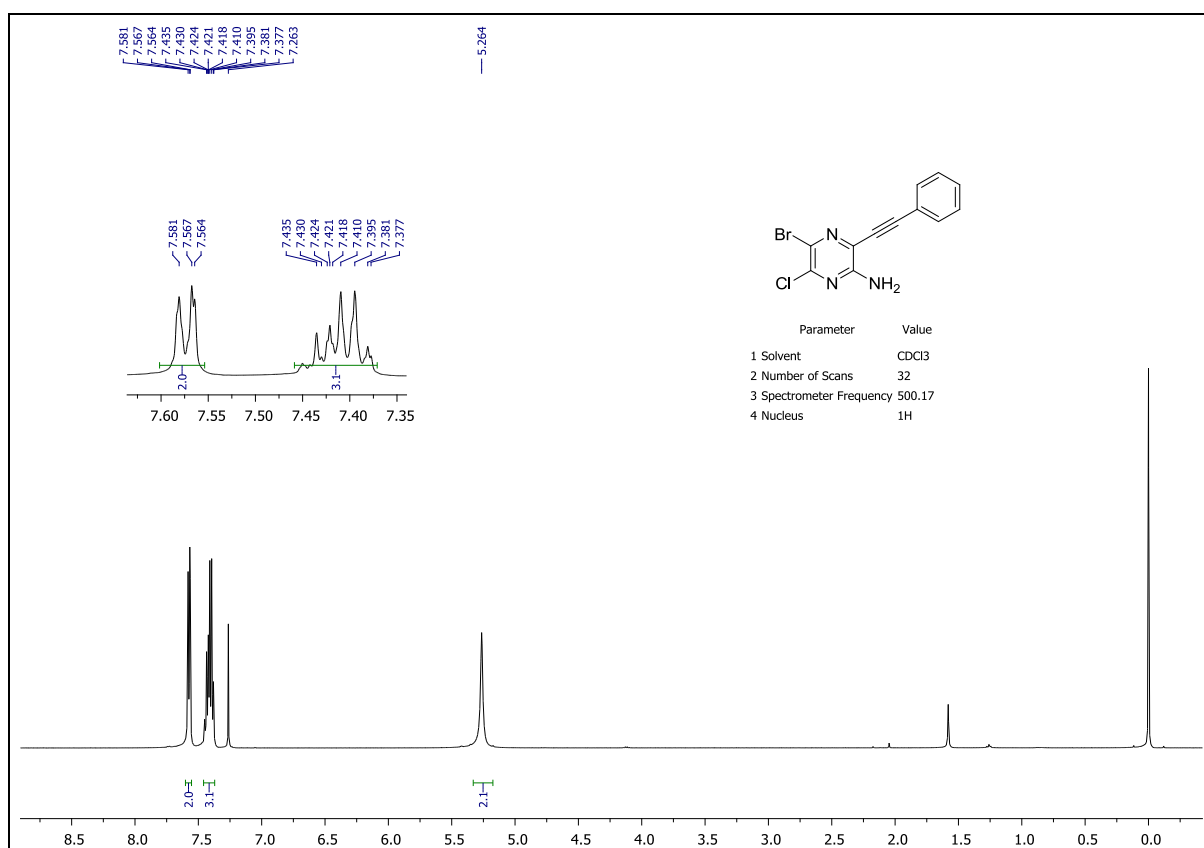

<sup>1</sup>H NMR – 1b

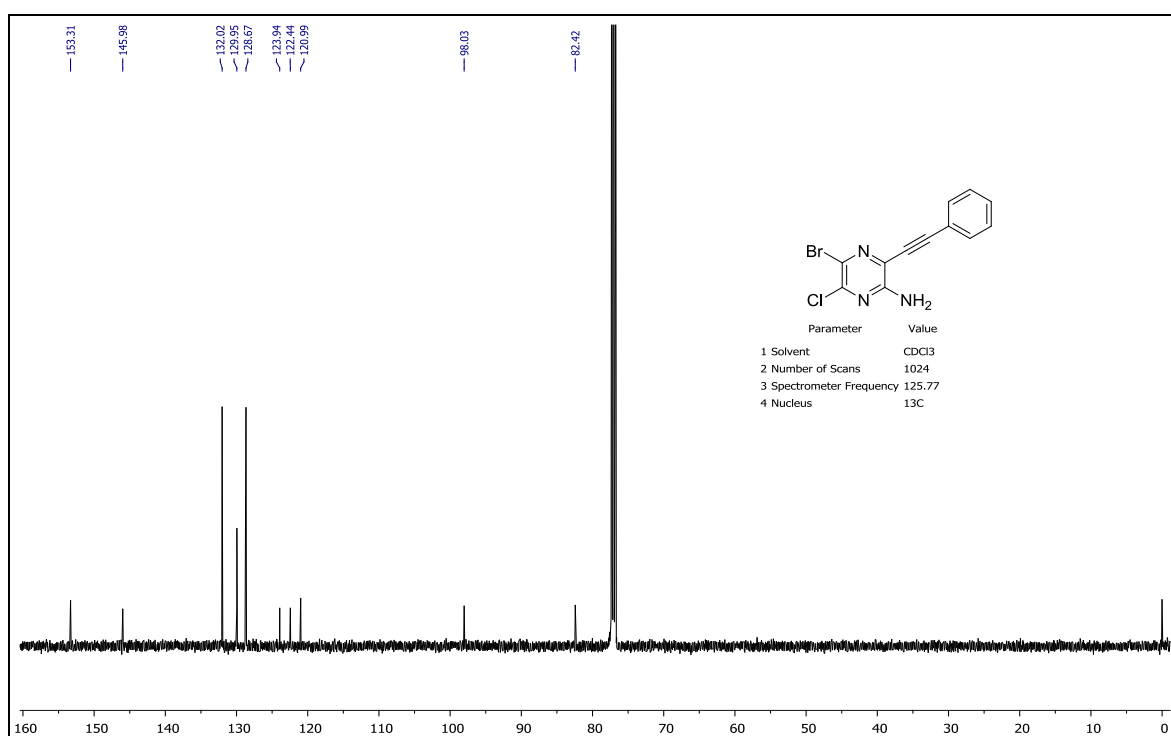

<sup>13</sup>C NMR – 1b

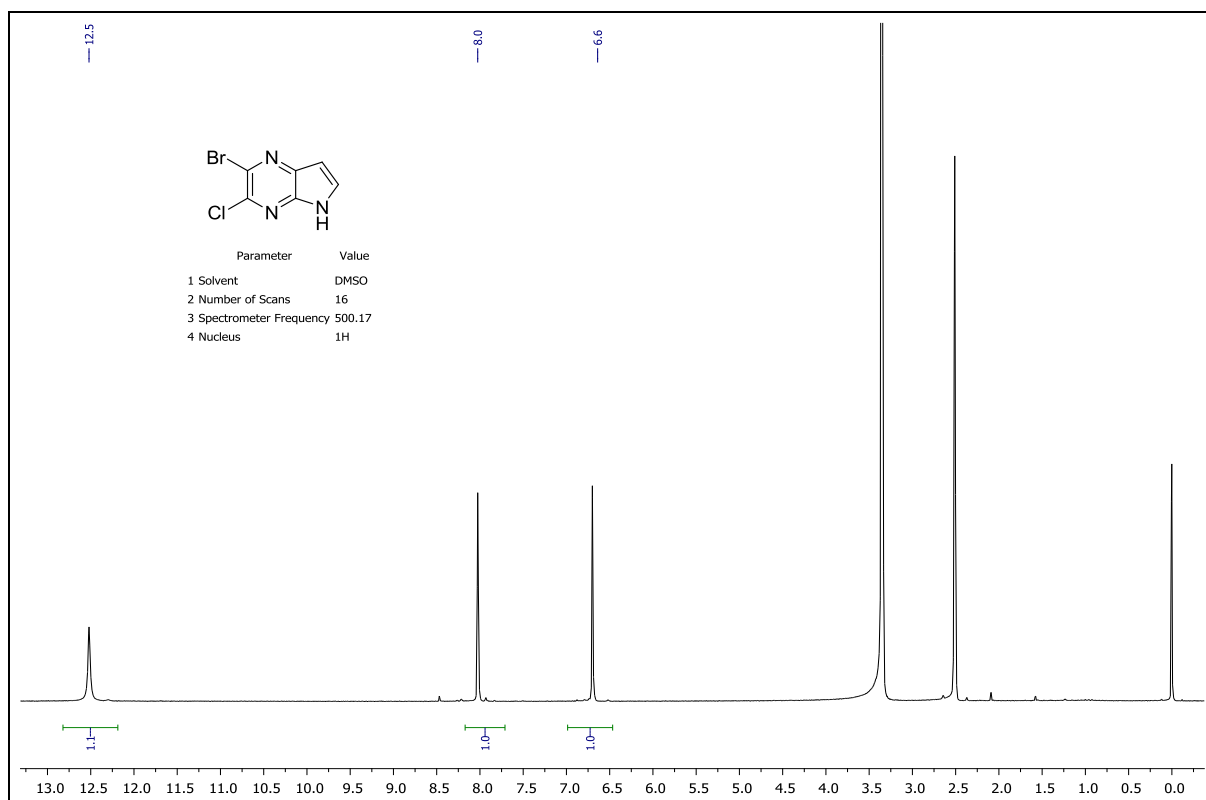

<sup>1</sup>H NMR – 2a

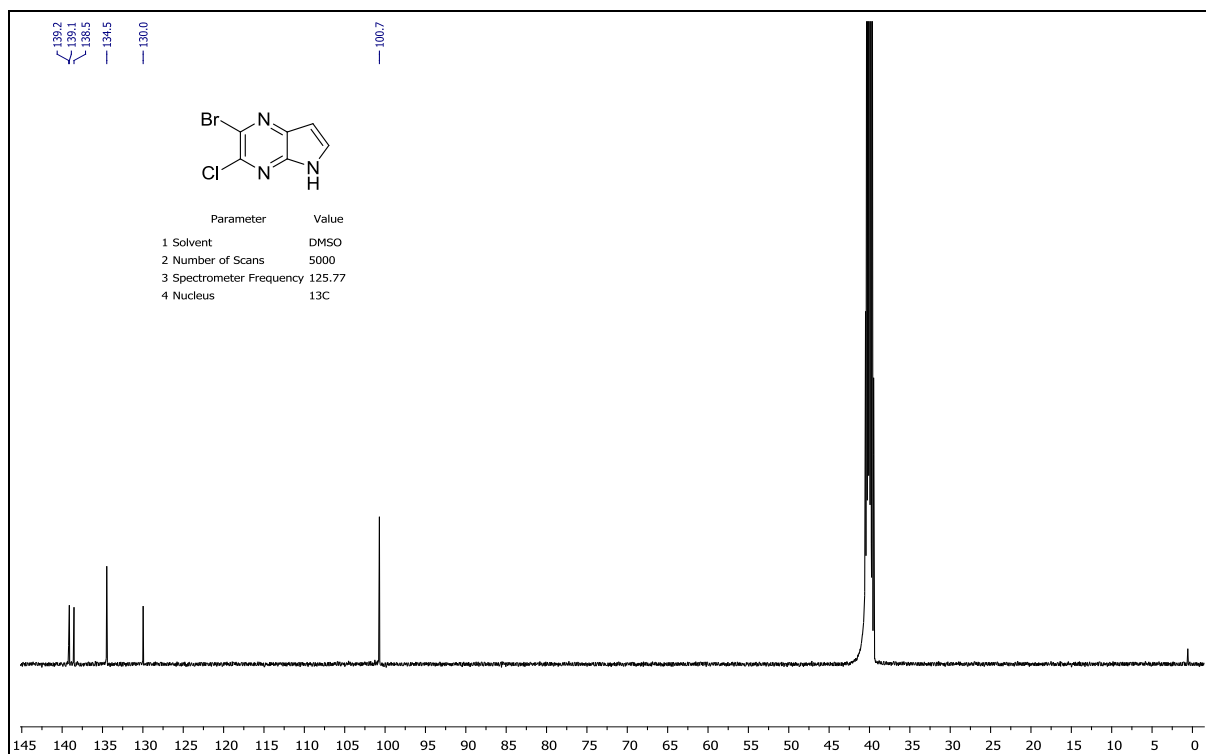

<sup>13</sup>C NMR – 2a

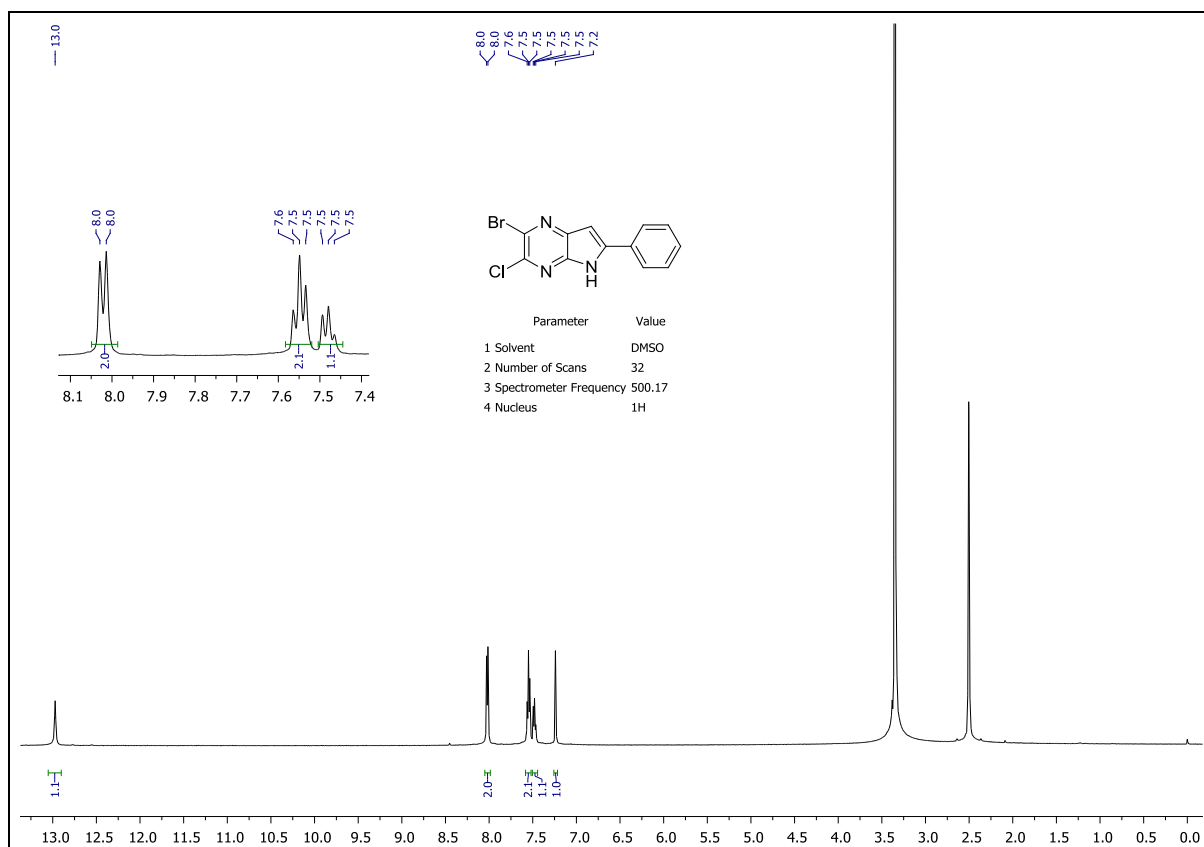

<sup>1</sup>H NMR – 2b

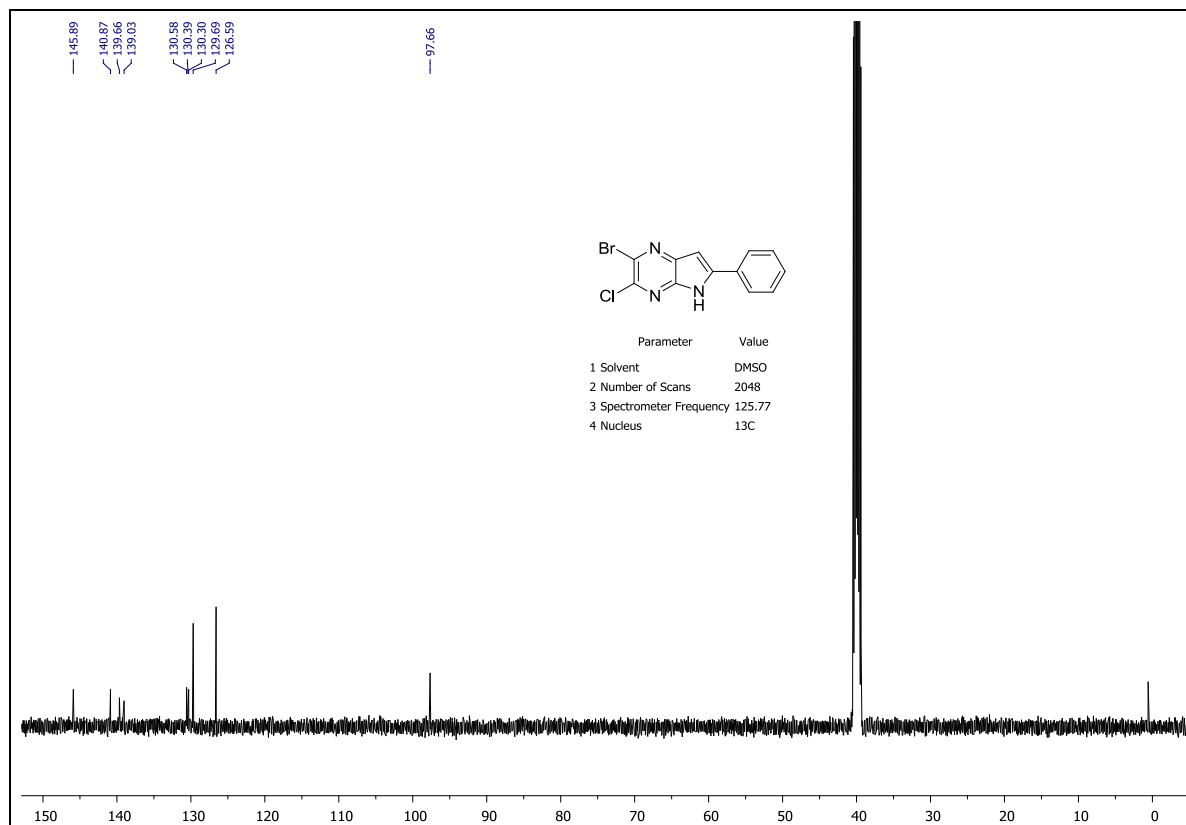

<sup>13</sup>C NMR – 2b

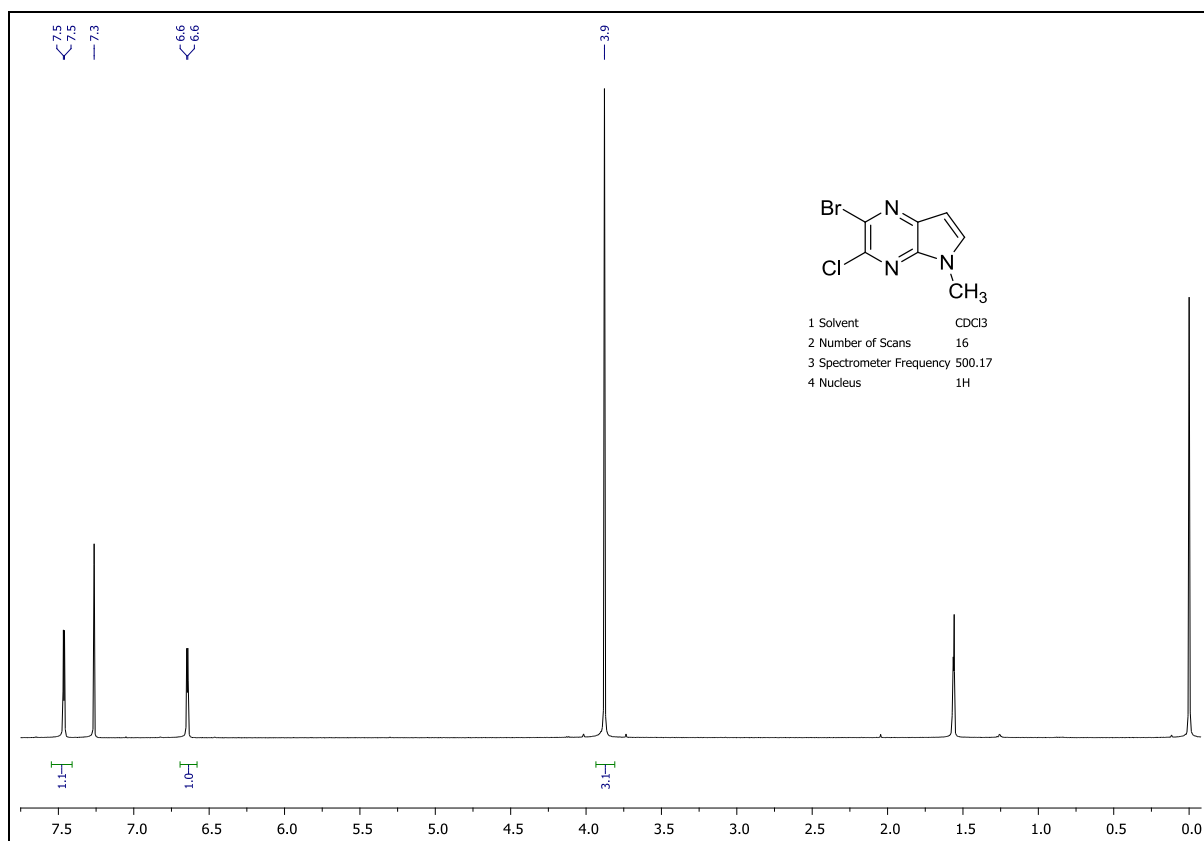

<sup>1</sup>H NMR – 3a

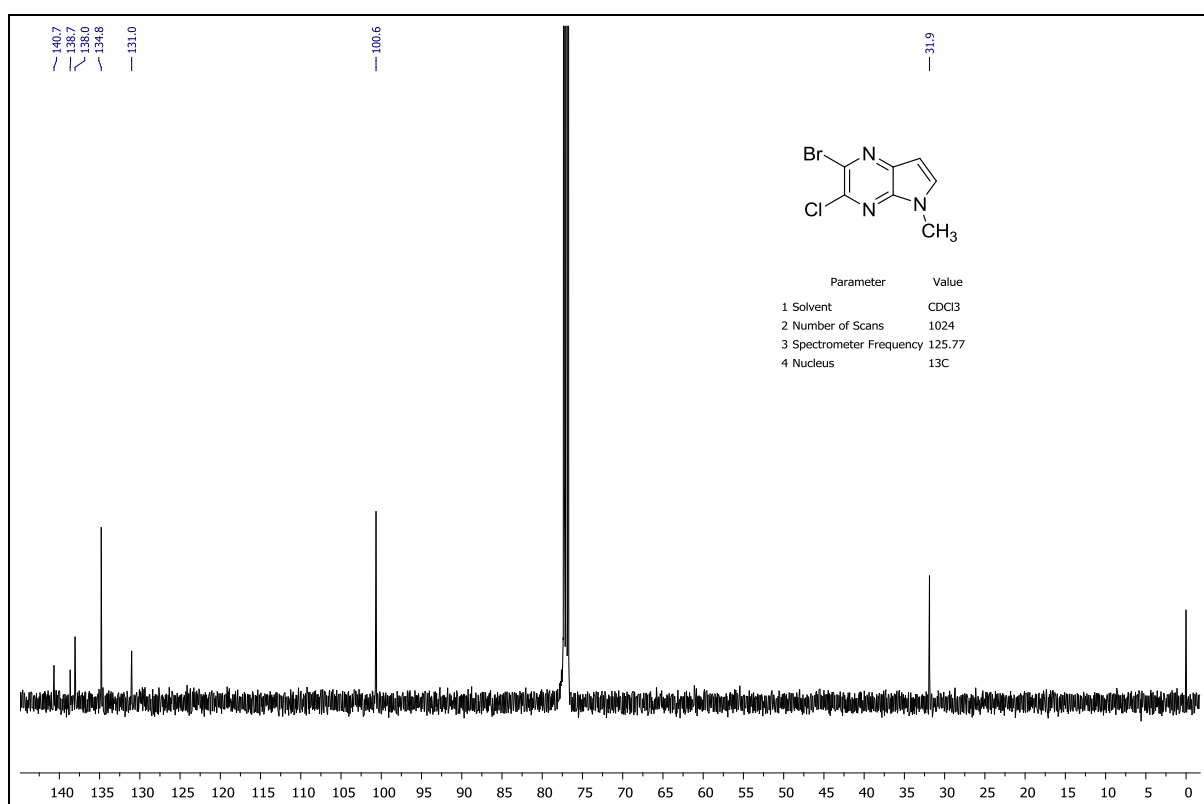

<sup>13</sup>C NMR – 3a

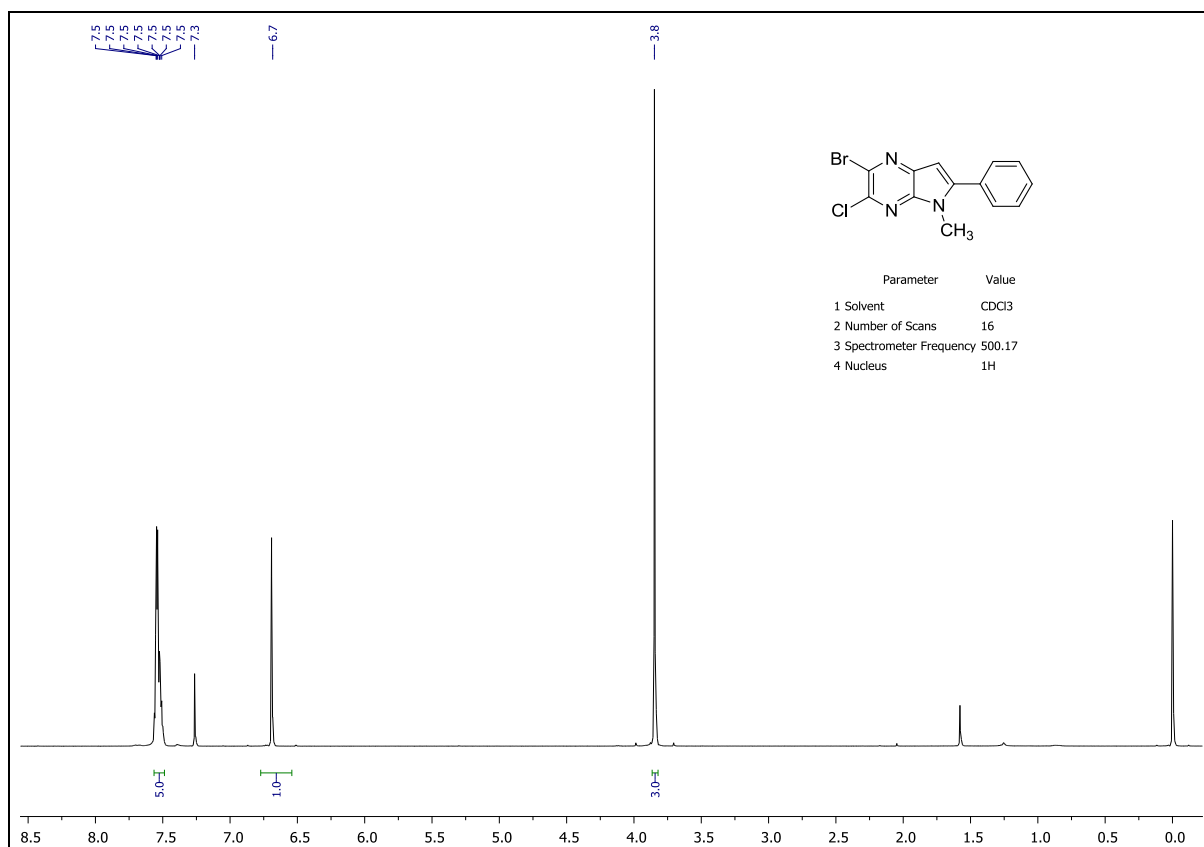

**<sup>1</sup>H NMR – 3b**

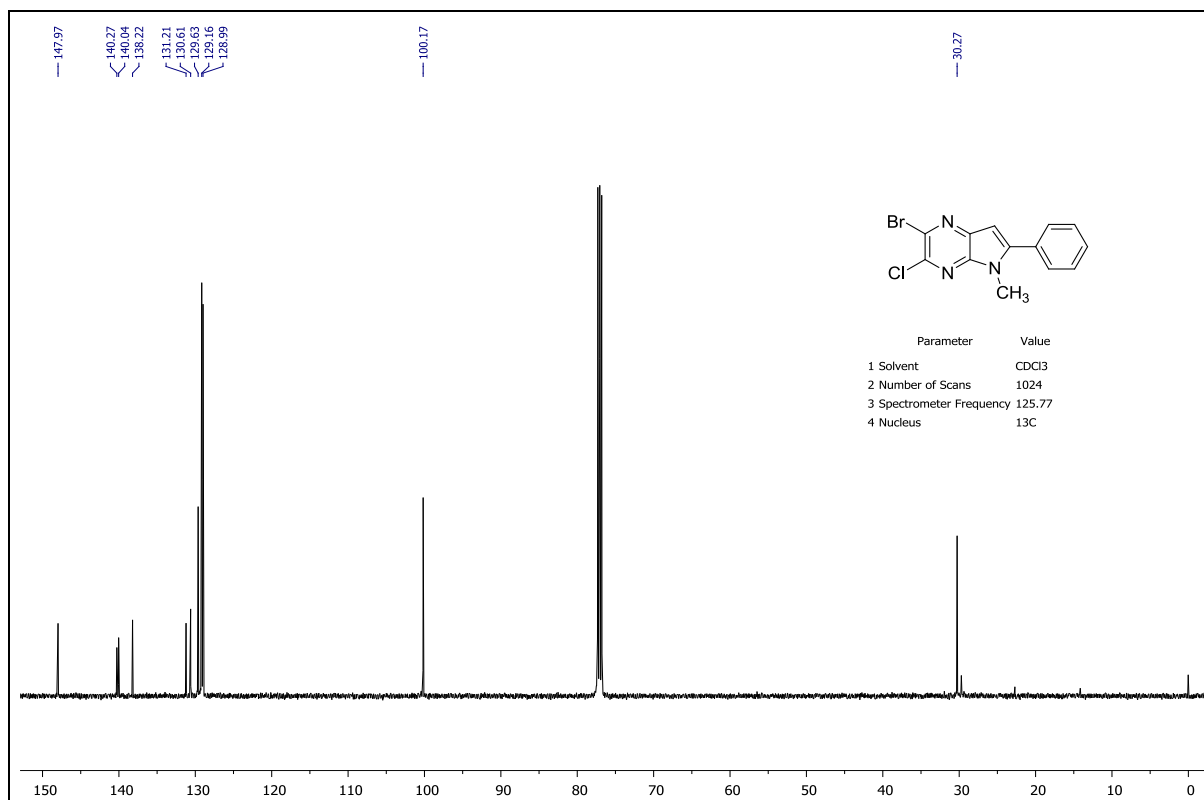

**<sup>13</sup>C NMR – 3b**

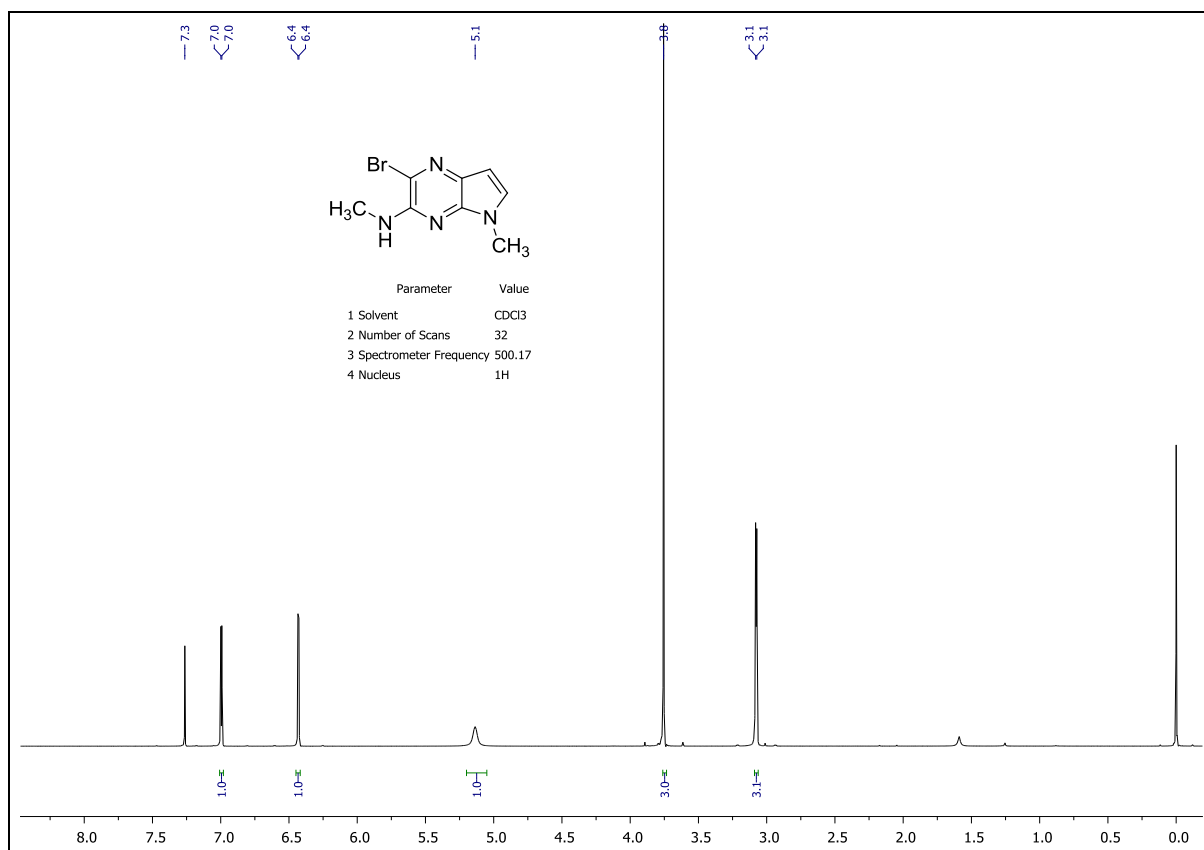

**<sup>1</sup>H NMR – 4a**

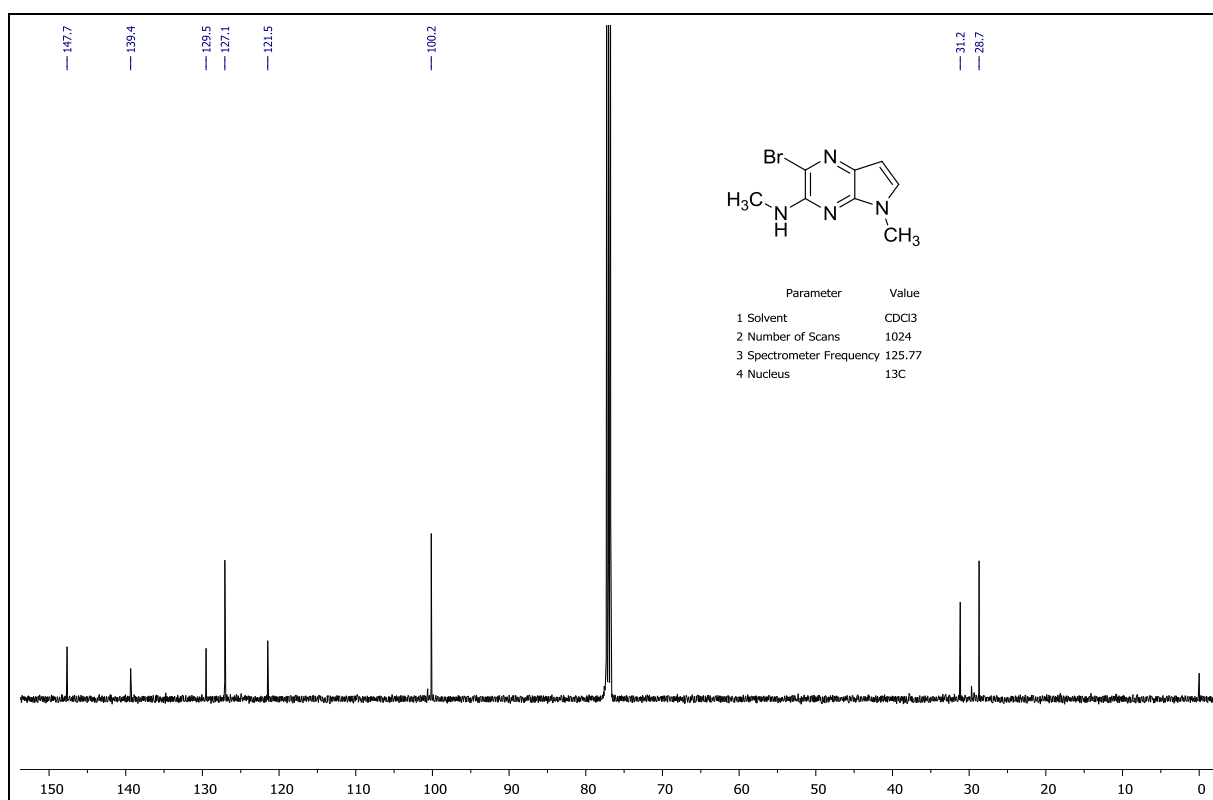

**<sup>13</sup>C NMR – 4a**

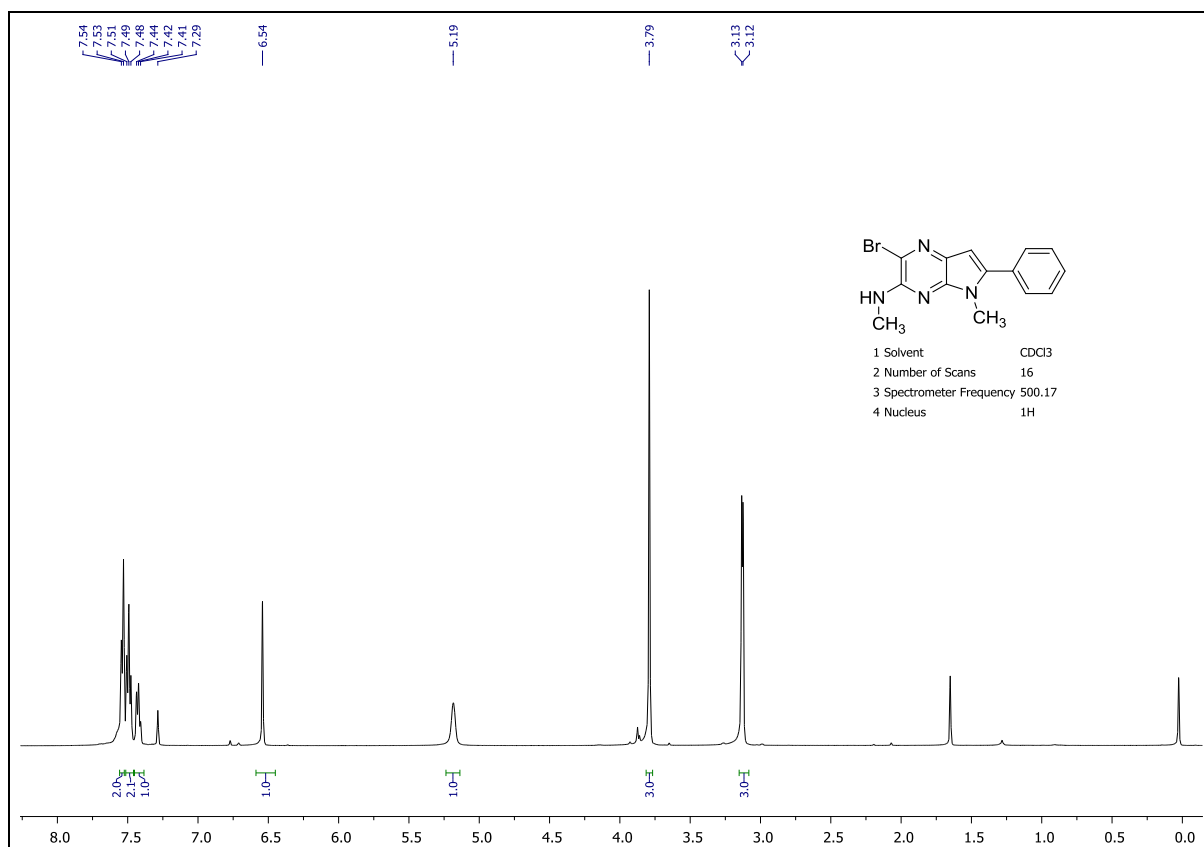

<sup>1</sup>H NMR – 4b

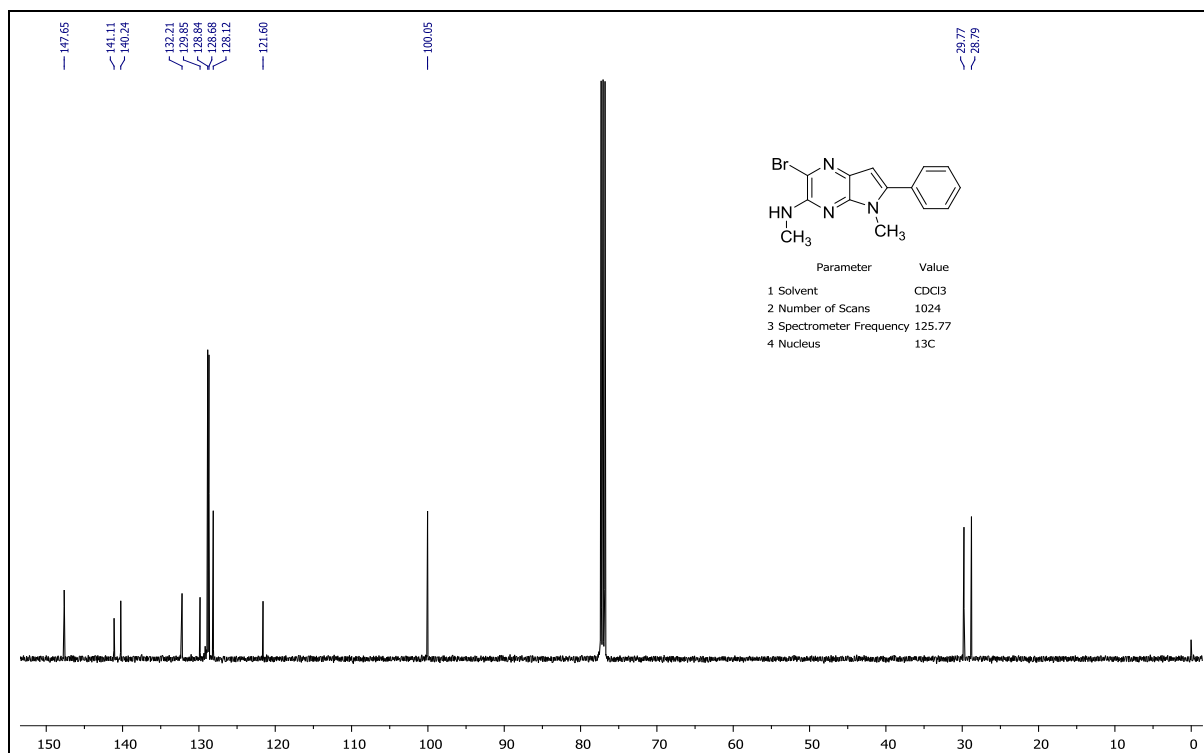

<sup>13</sup>C NMR – 4b



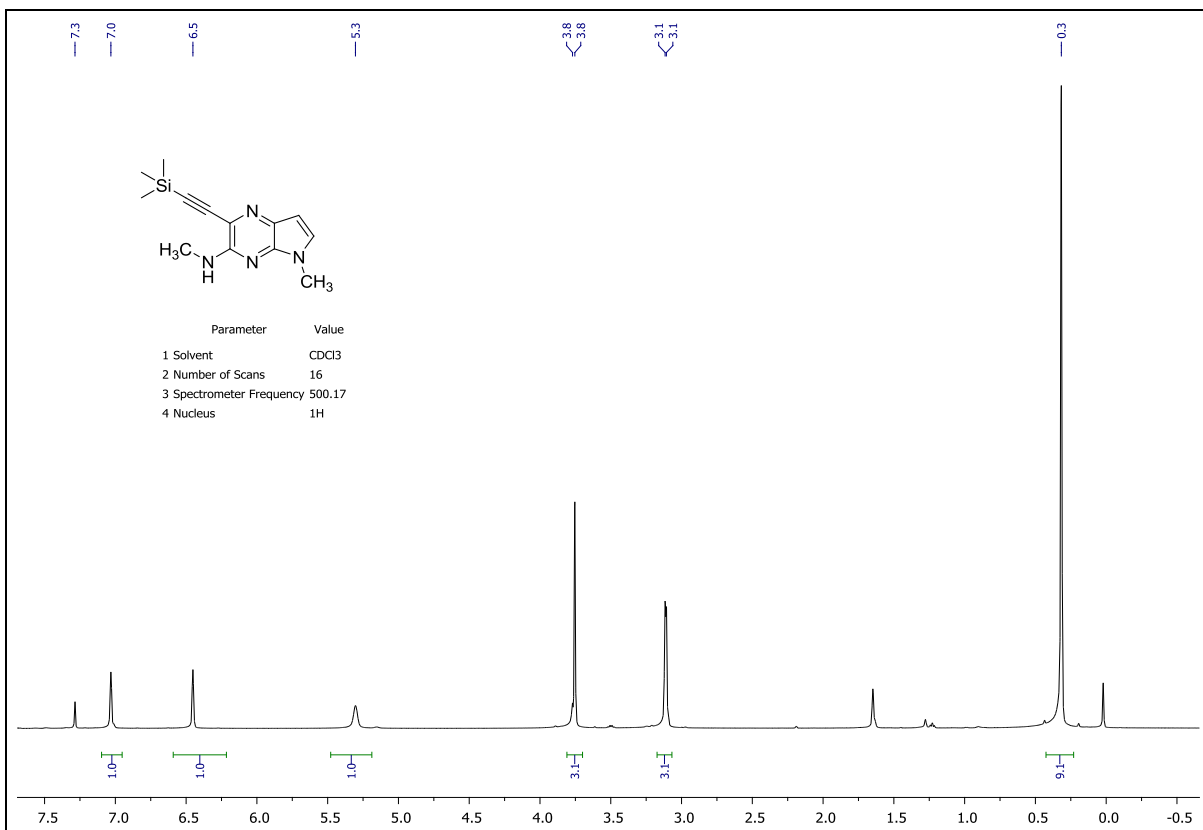

<sup>1</sup>H NMR – 5a

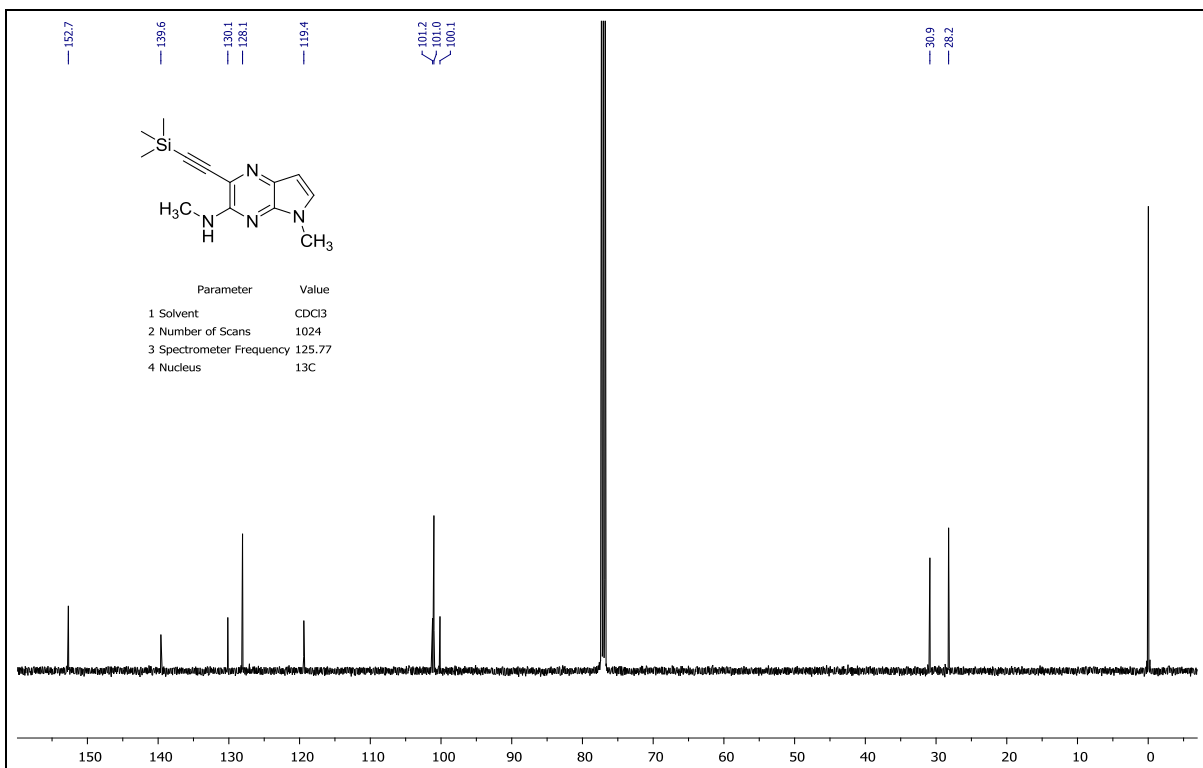

<sup>13</sup>C NMR – 5a

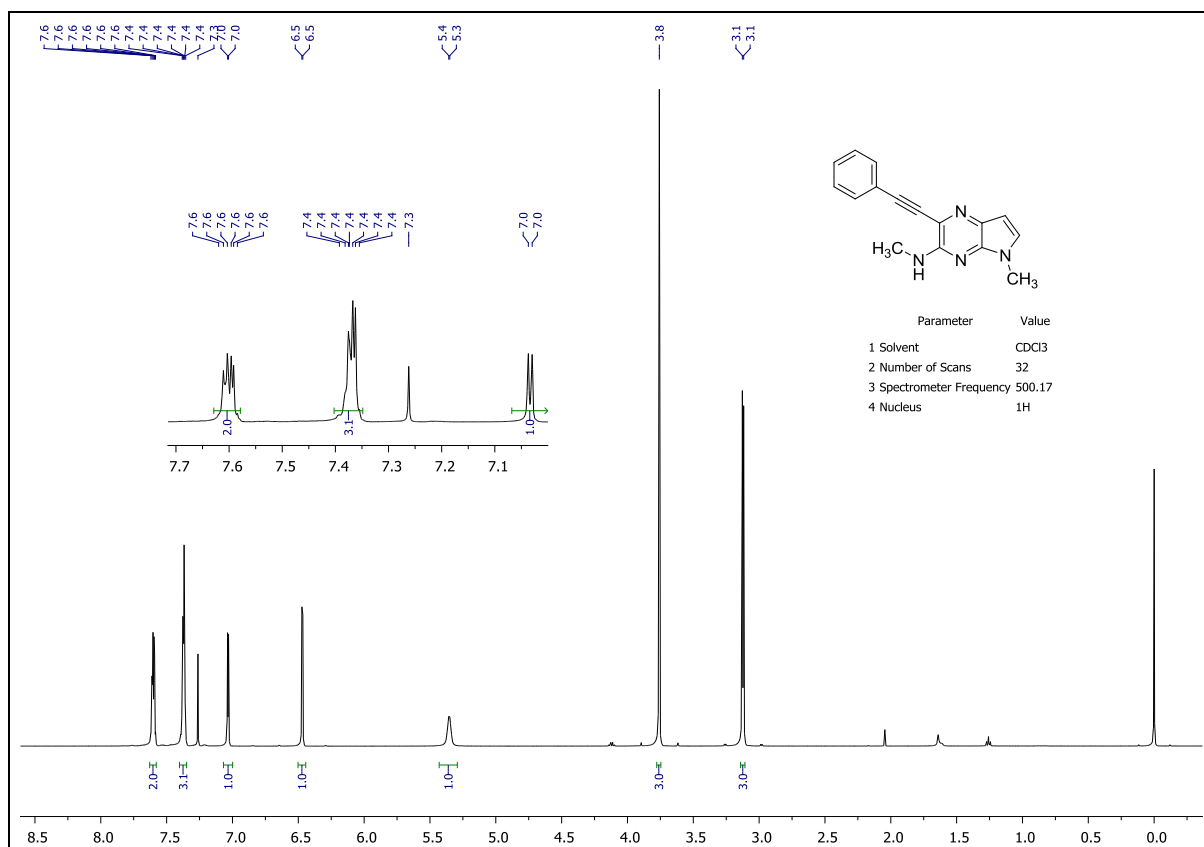

<sup>1</sup>H NMR – 5b

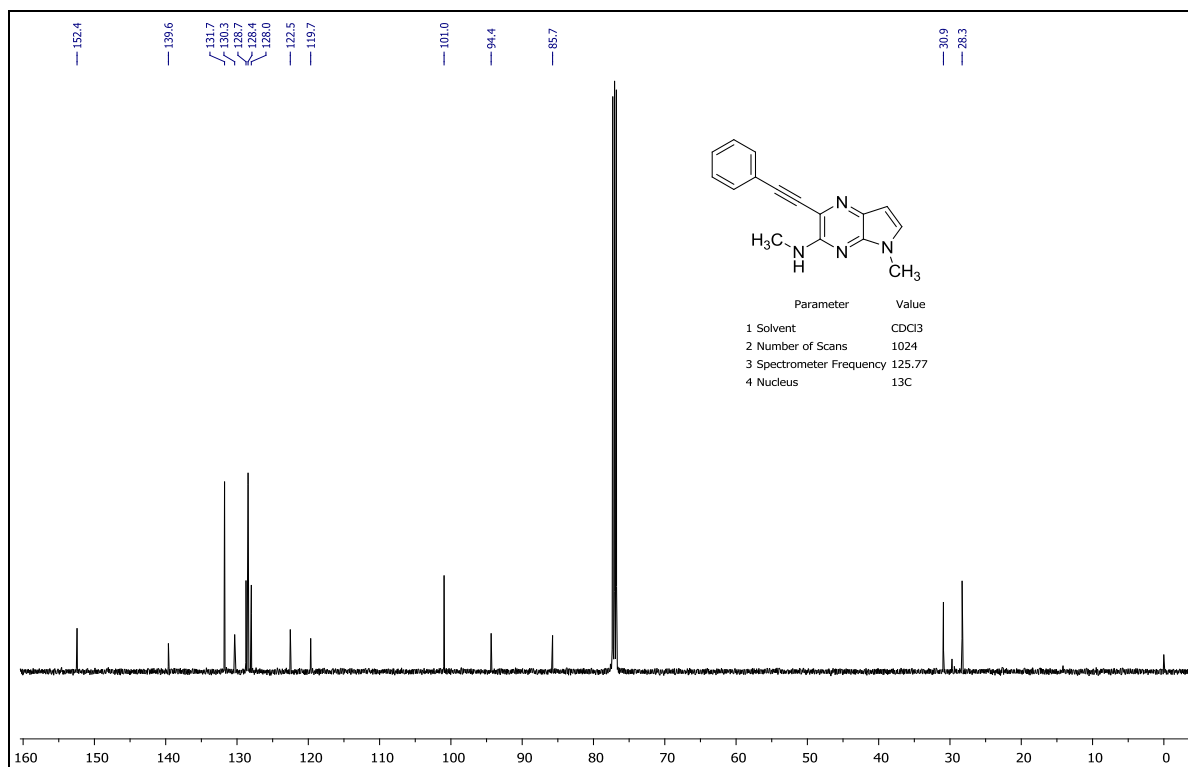

<sup>13</sup>C NMR – 5b

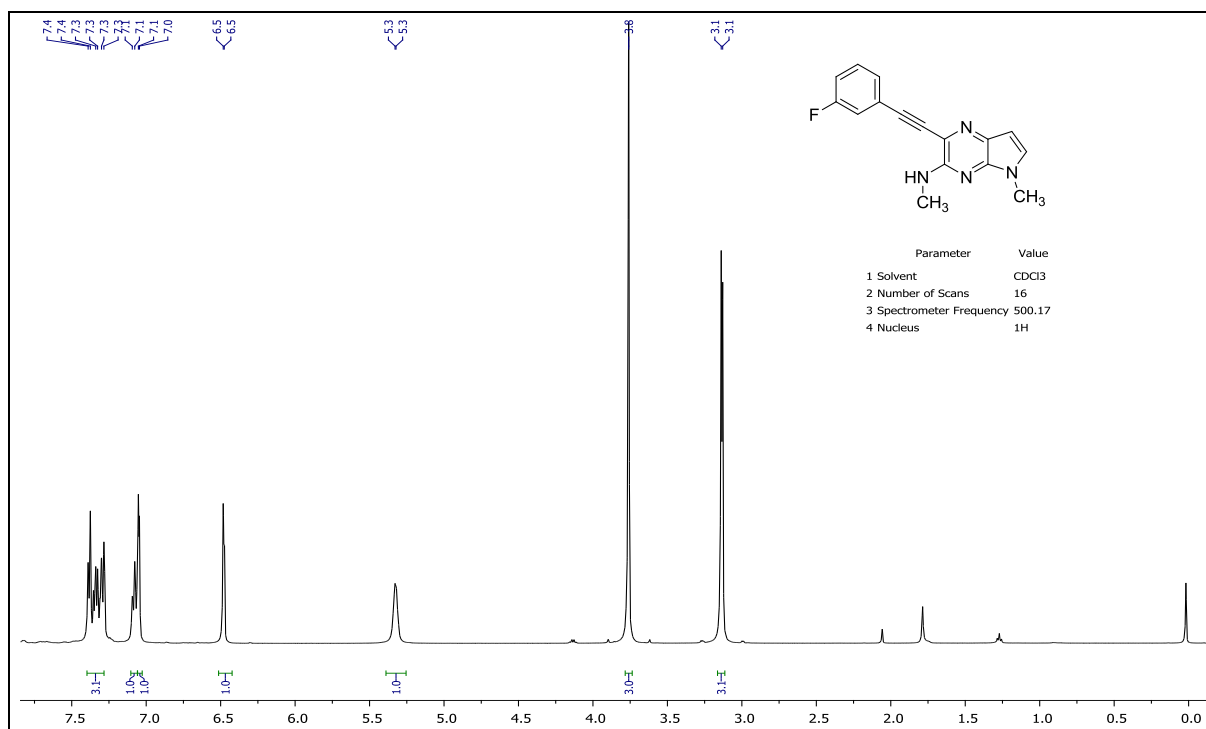

**<sup>1</sup>H NMR – 5c**

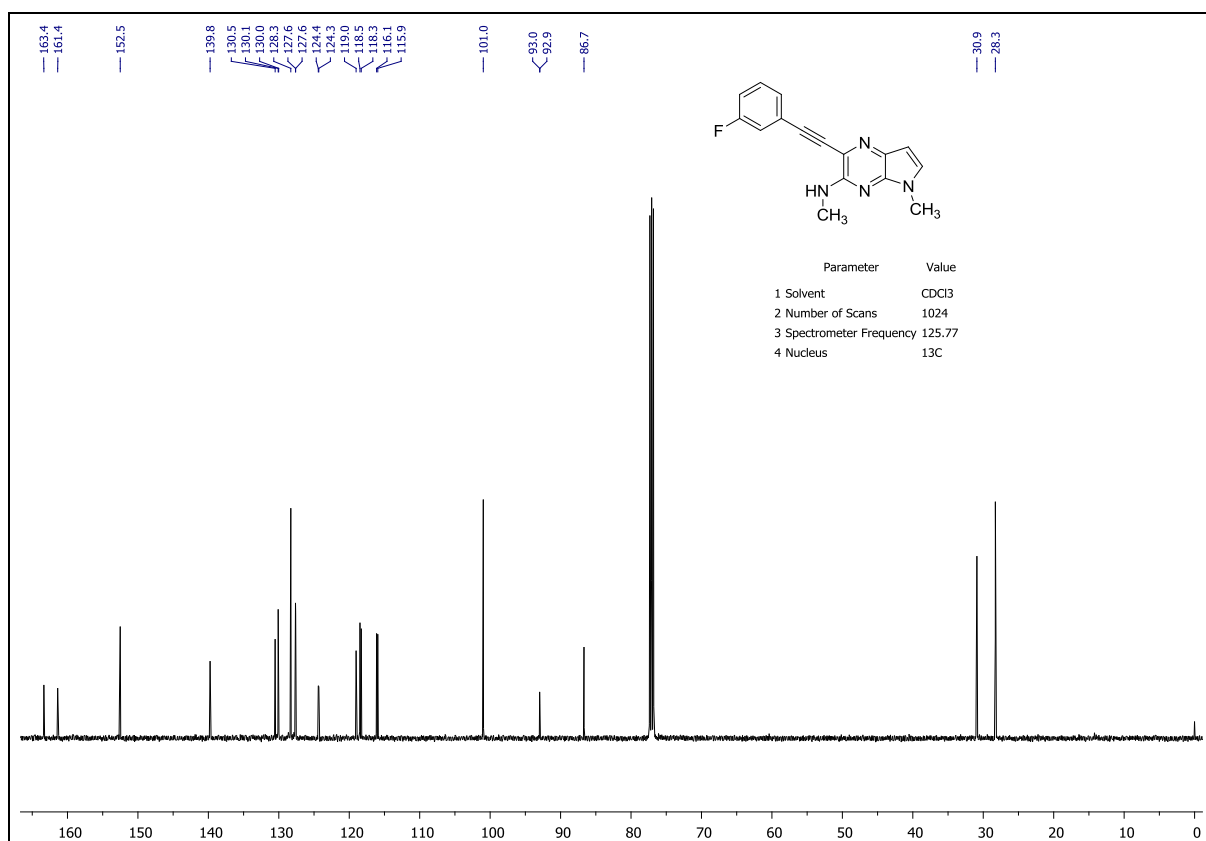

**<sup>13</sup>C NMR – 5c**

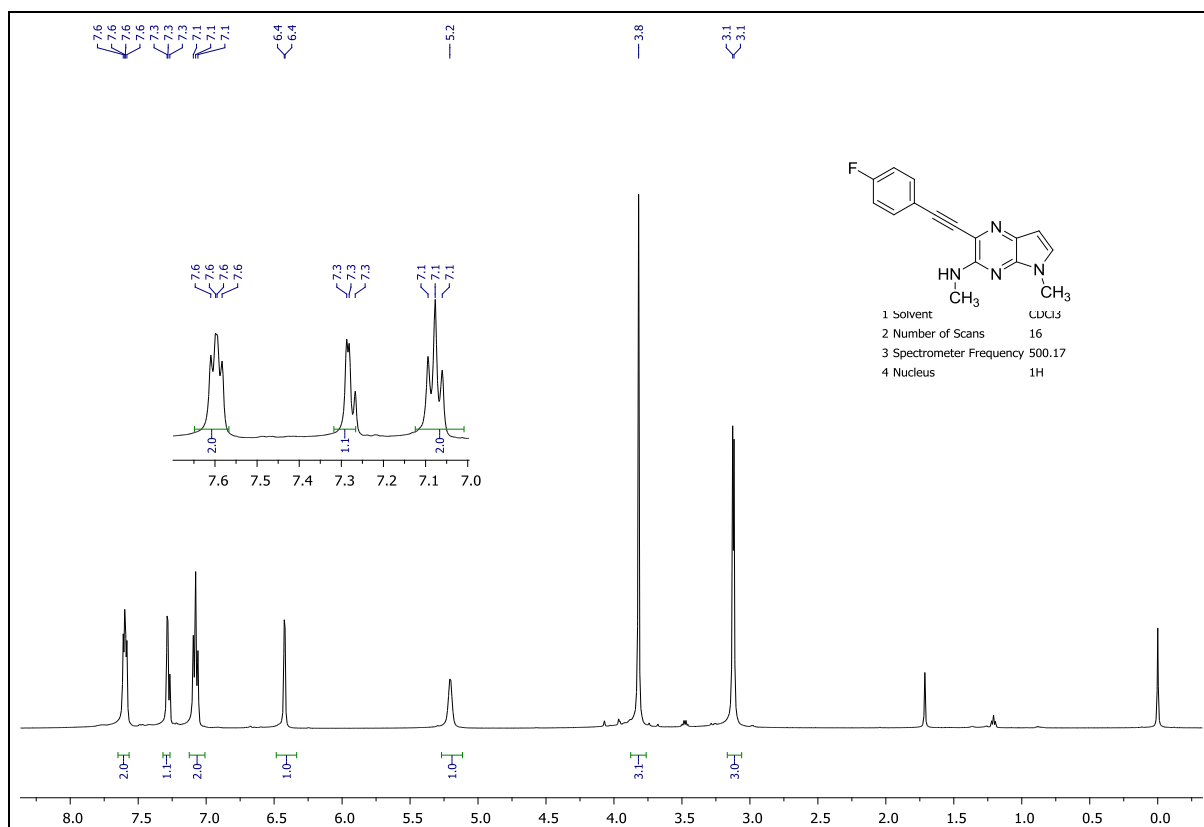

<sup>1</sup>H NMR – 5d

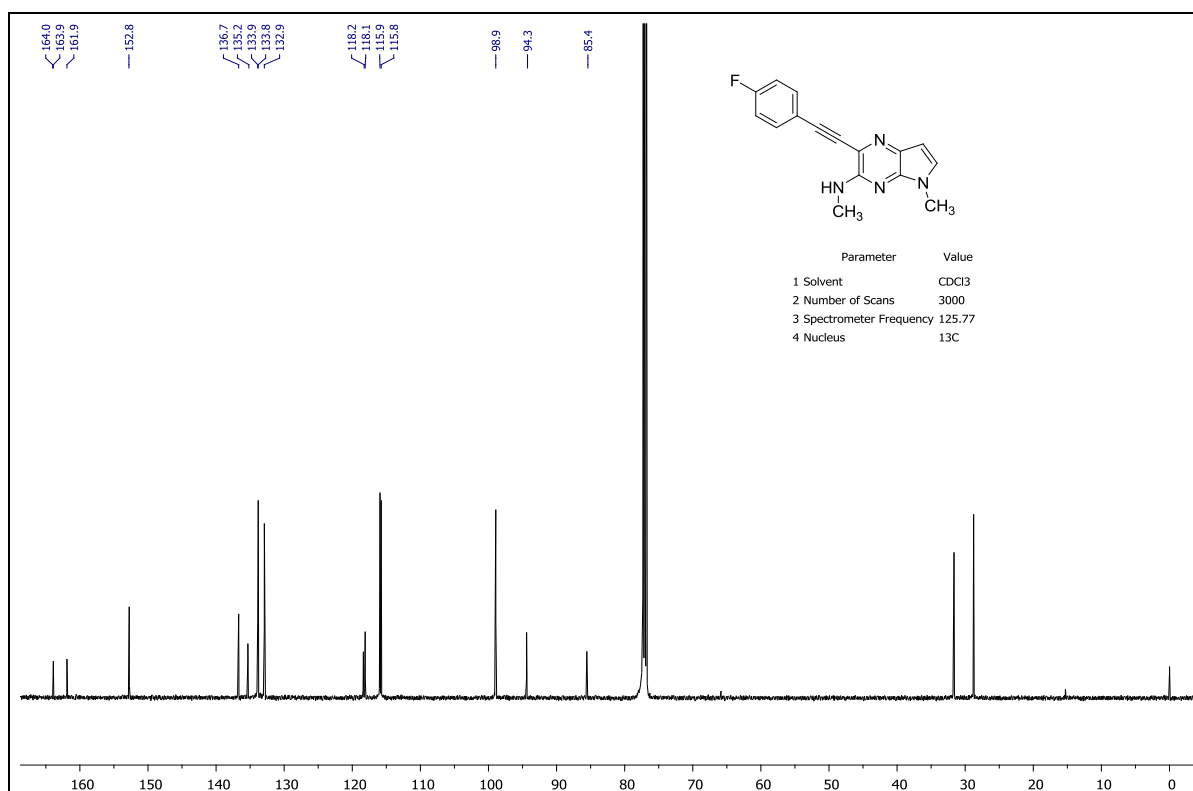

<sup>13</sup>C NMR – 5d

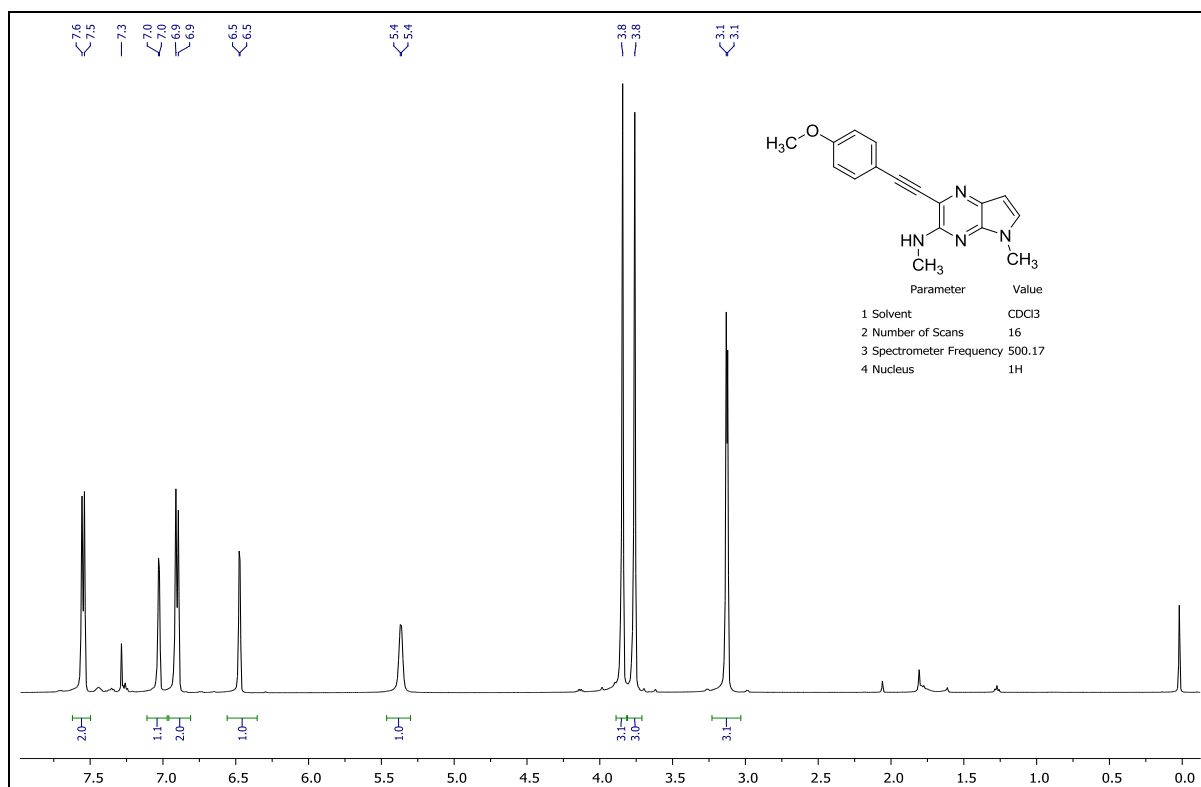

<sup>1</sup>H NMR – 5e

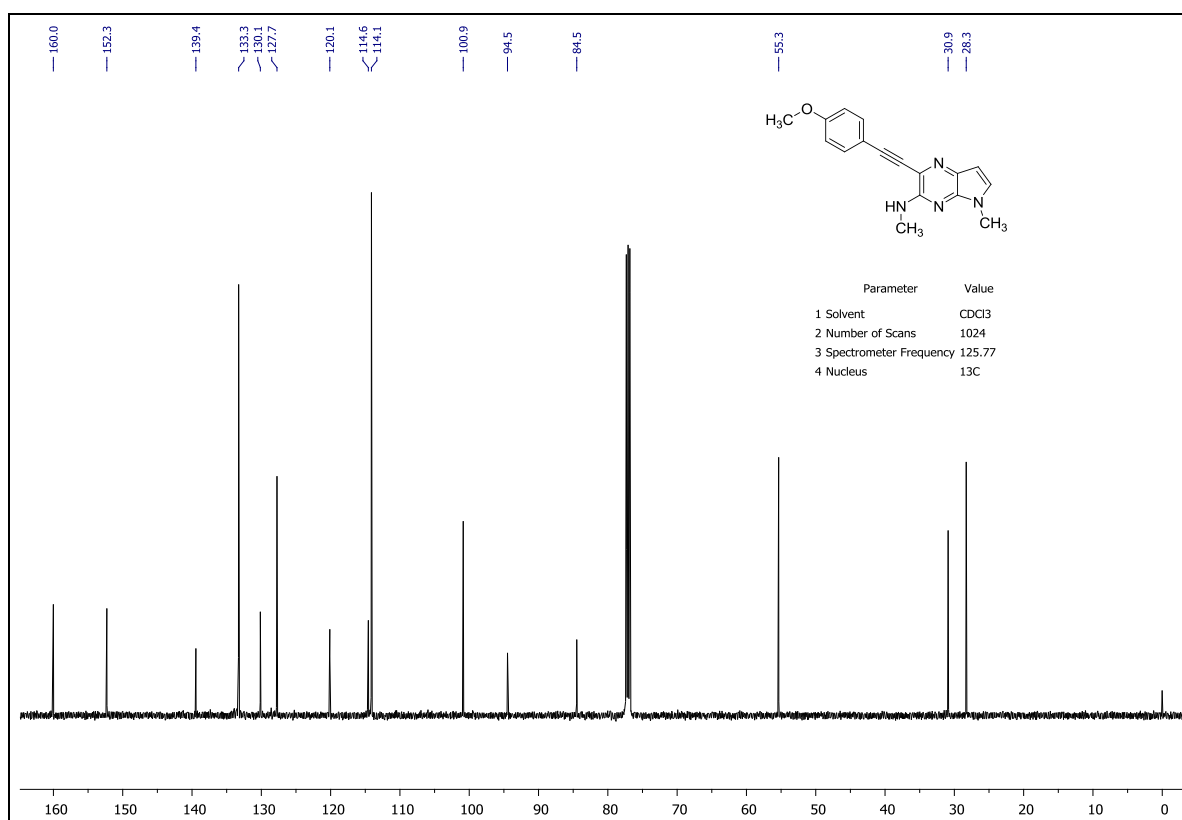

<sup>13</sup>C NMR – 5e

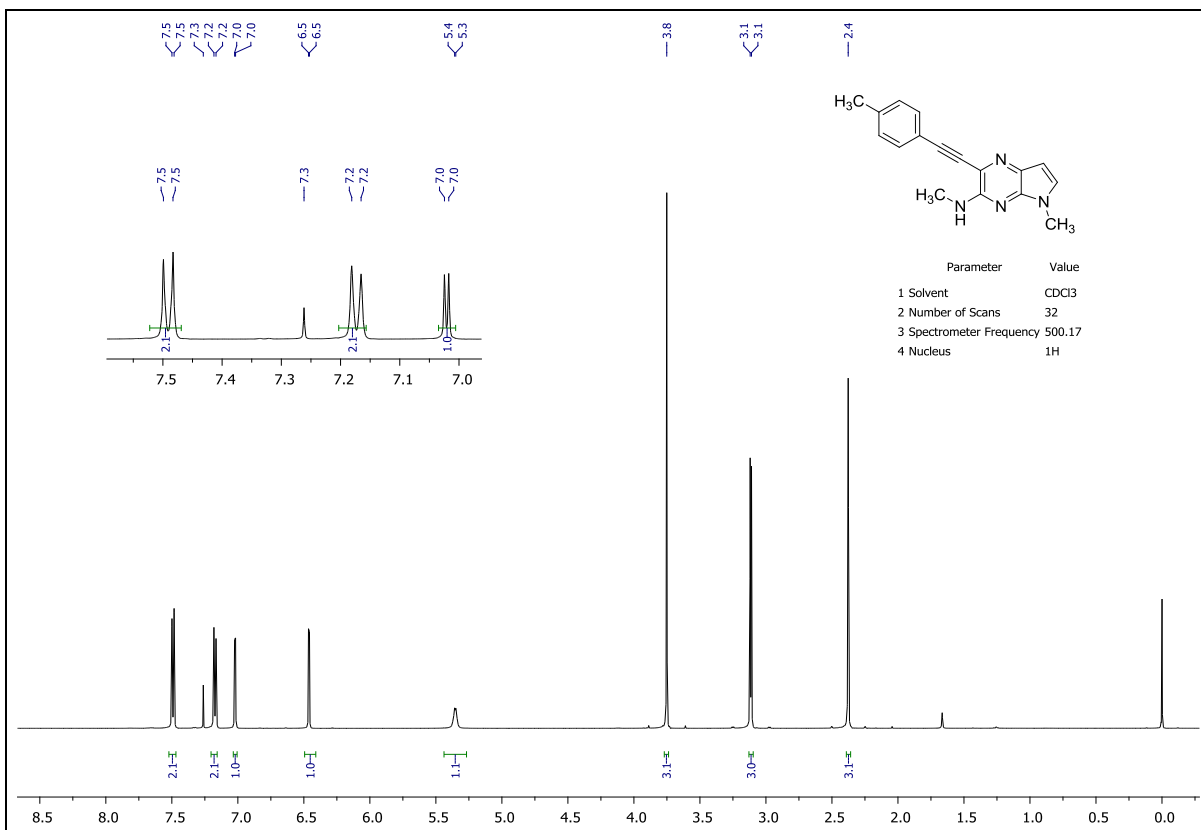

<sup>1</sup>H NMR – 5f

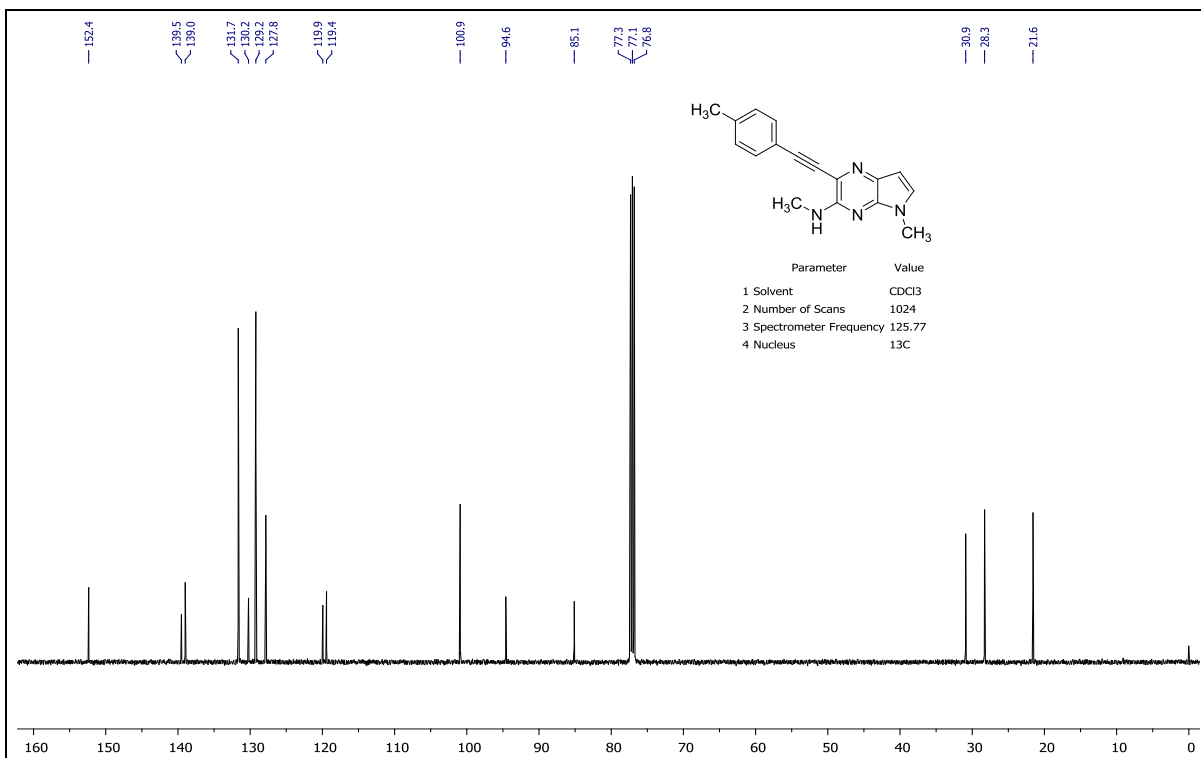

<sup>13</sup>C NMR – 5f

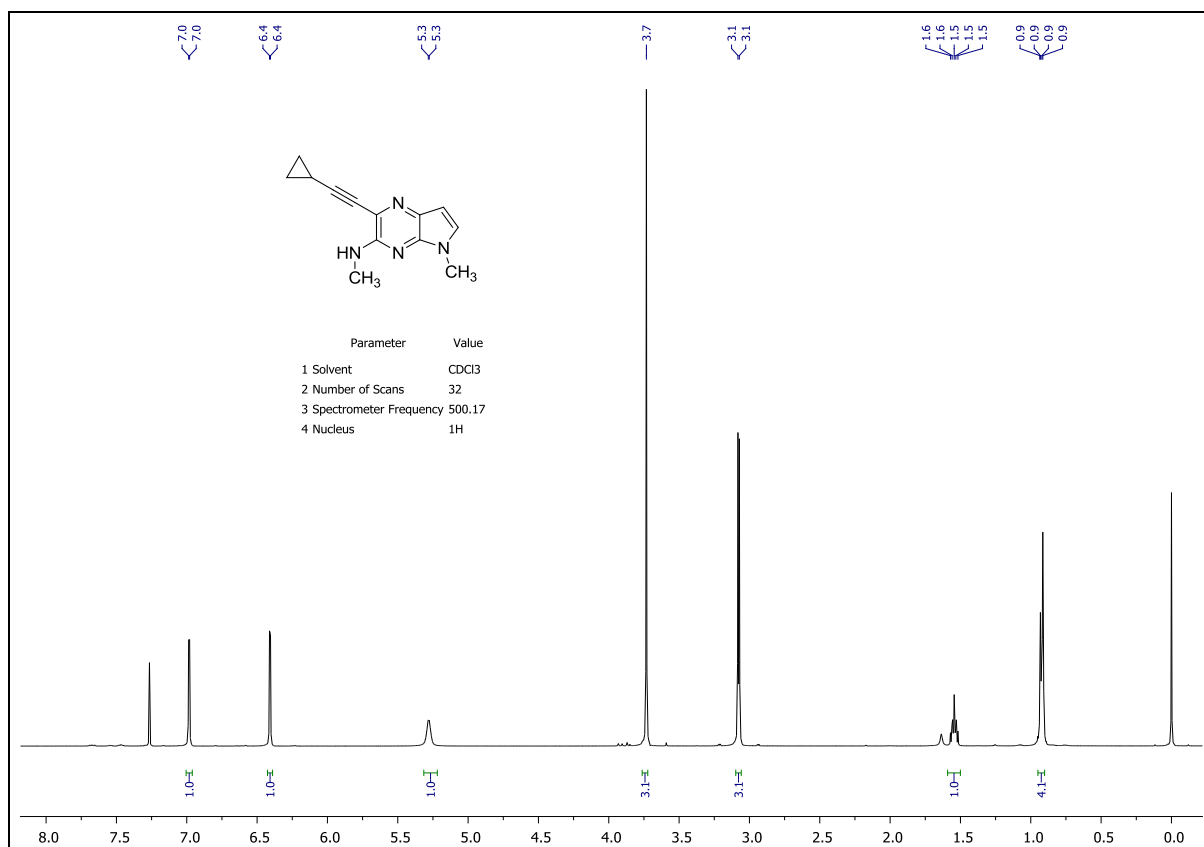

<sup>1</sup>H NMR – 5g

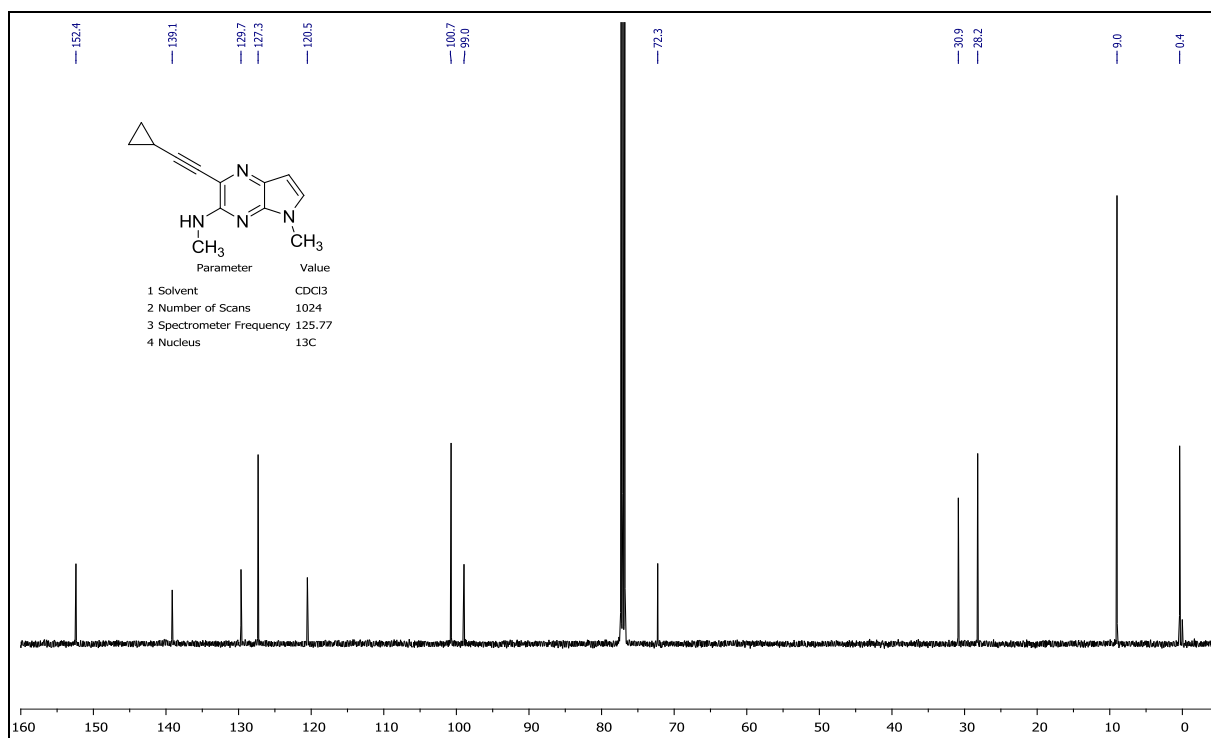

<sup>13</sup>C NMR – 5g

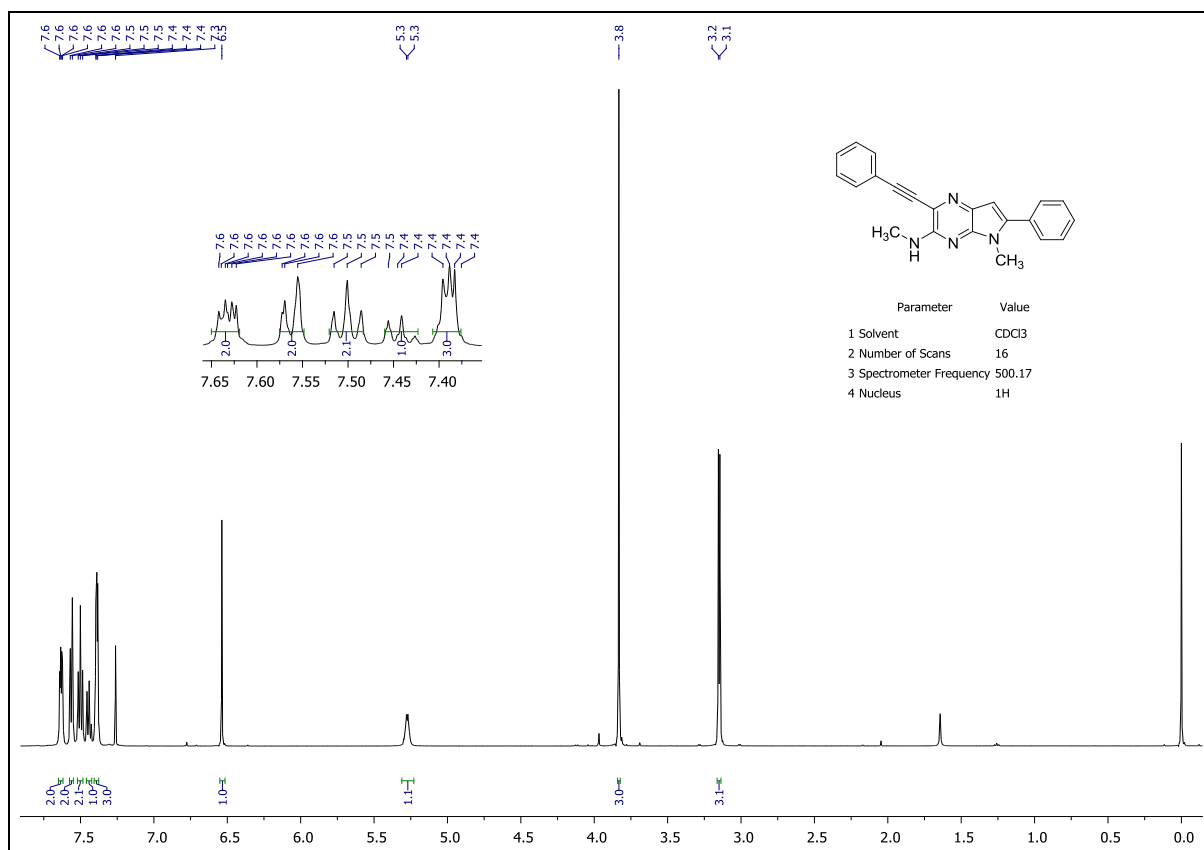

<sup>1</sup>H NMR – 5i

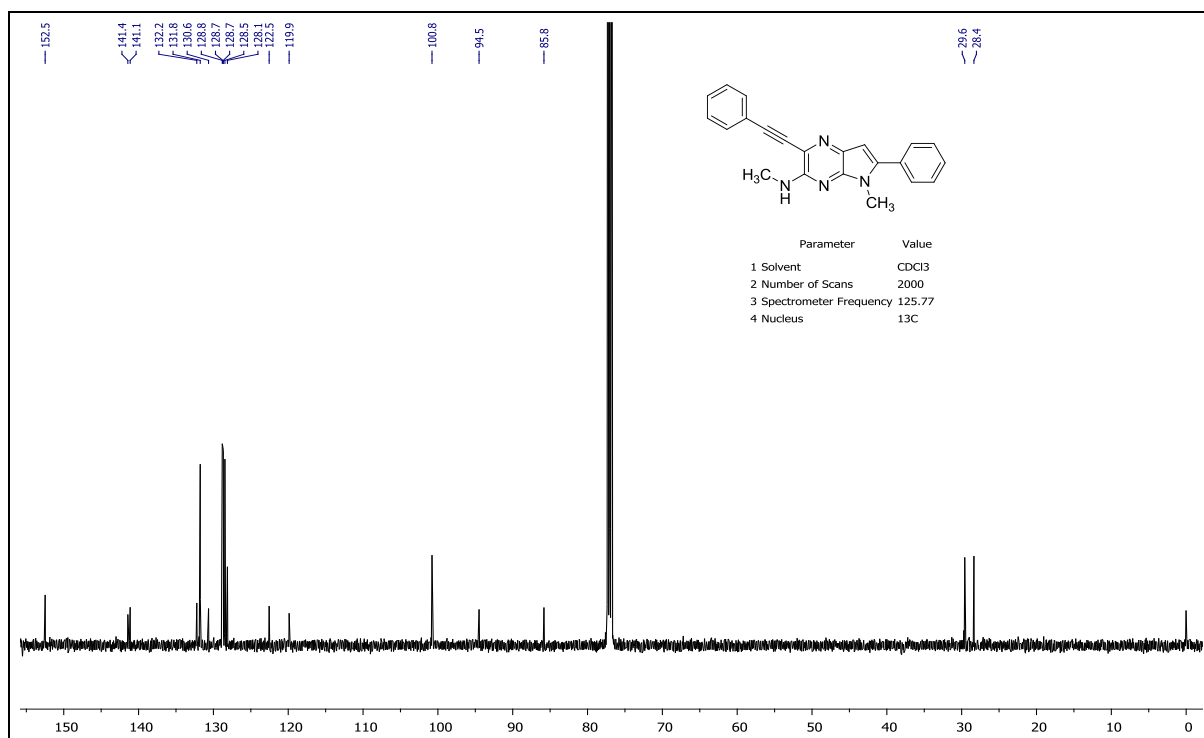

<sup>13</sup>C NMR – 5i



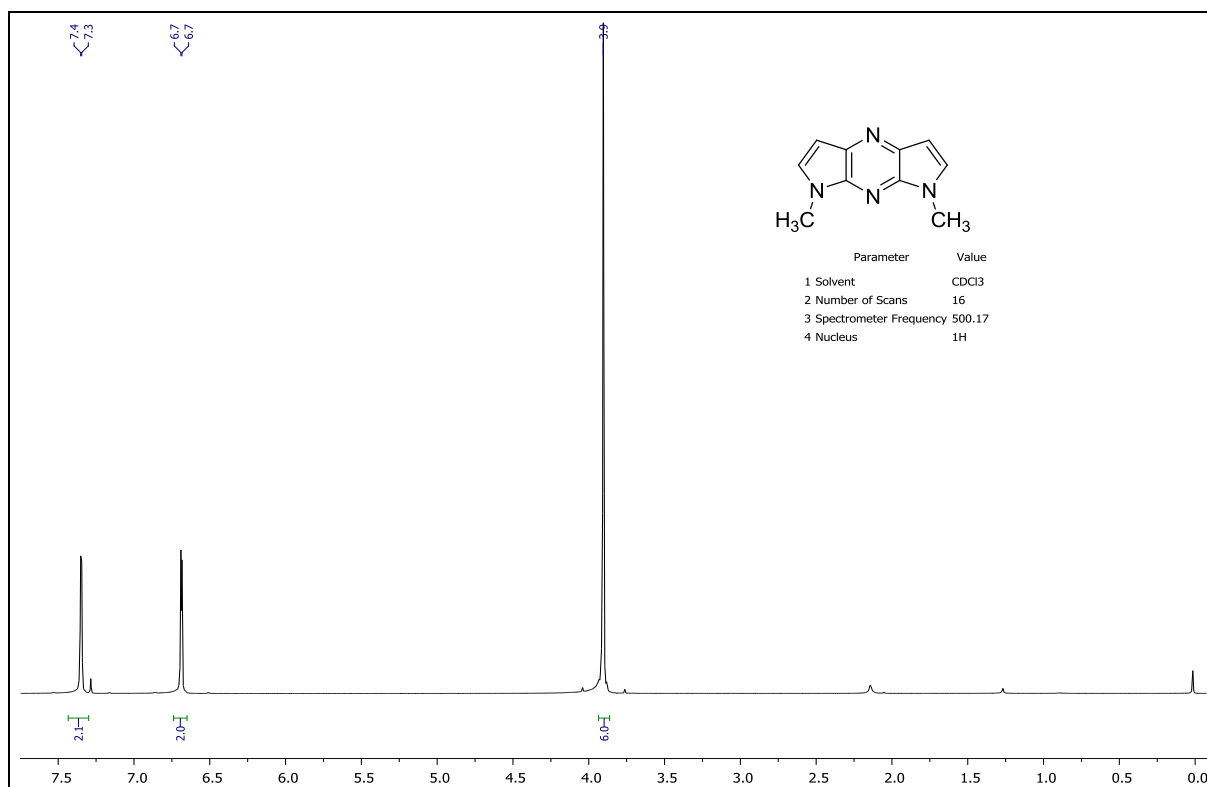

<sup>1</sup>H NMR – 6a

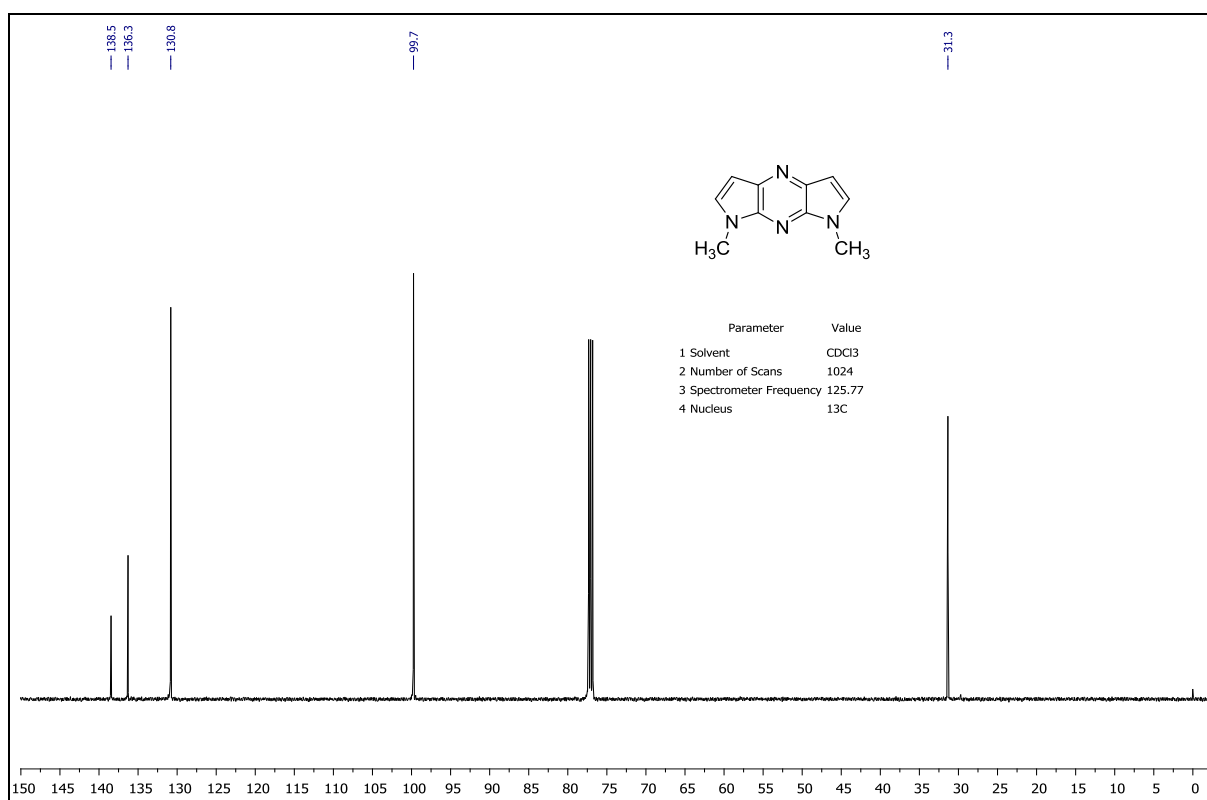

<sup>13</sup>C NMR – 6a

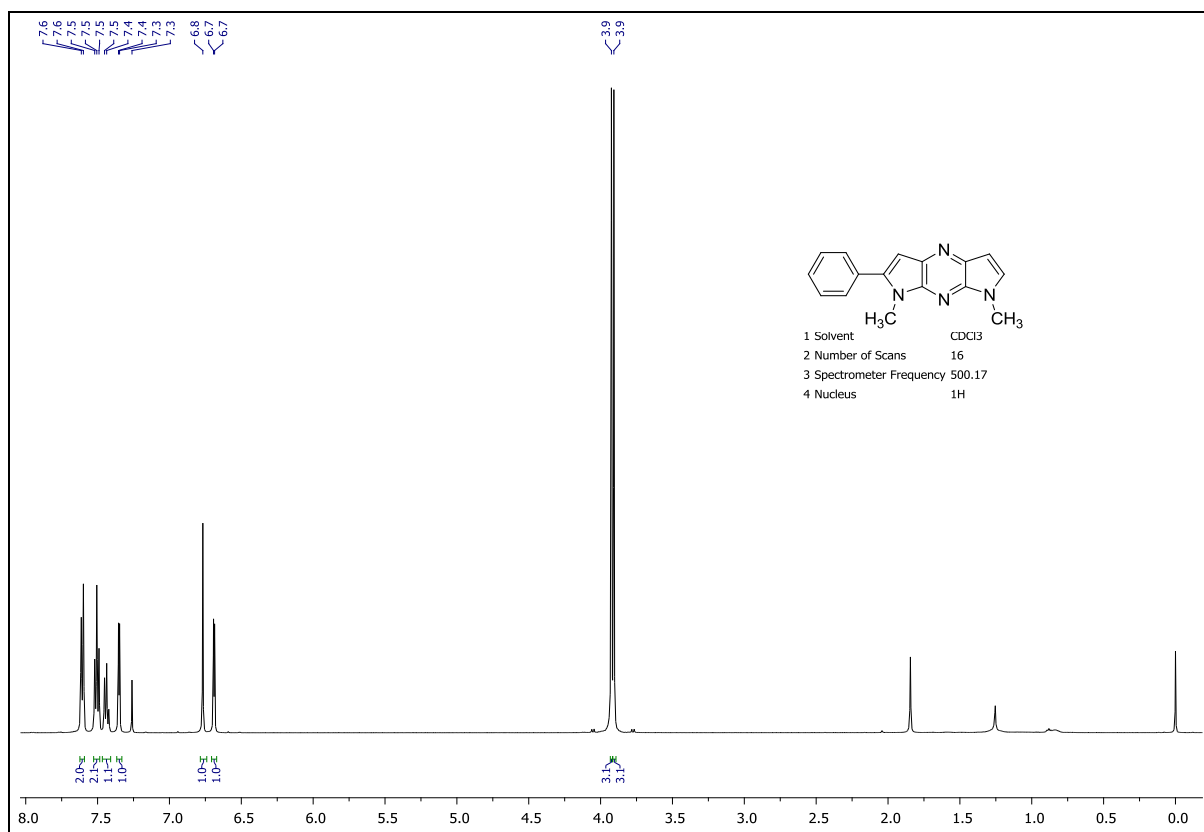

<sup>1</sup>H NMR – 6b

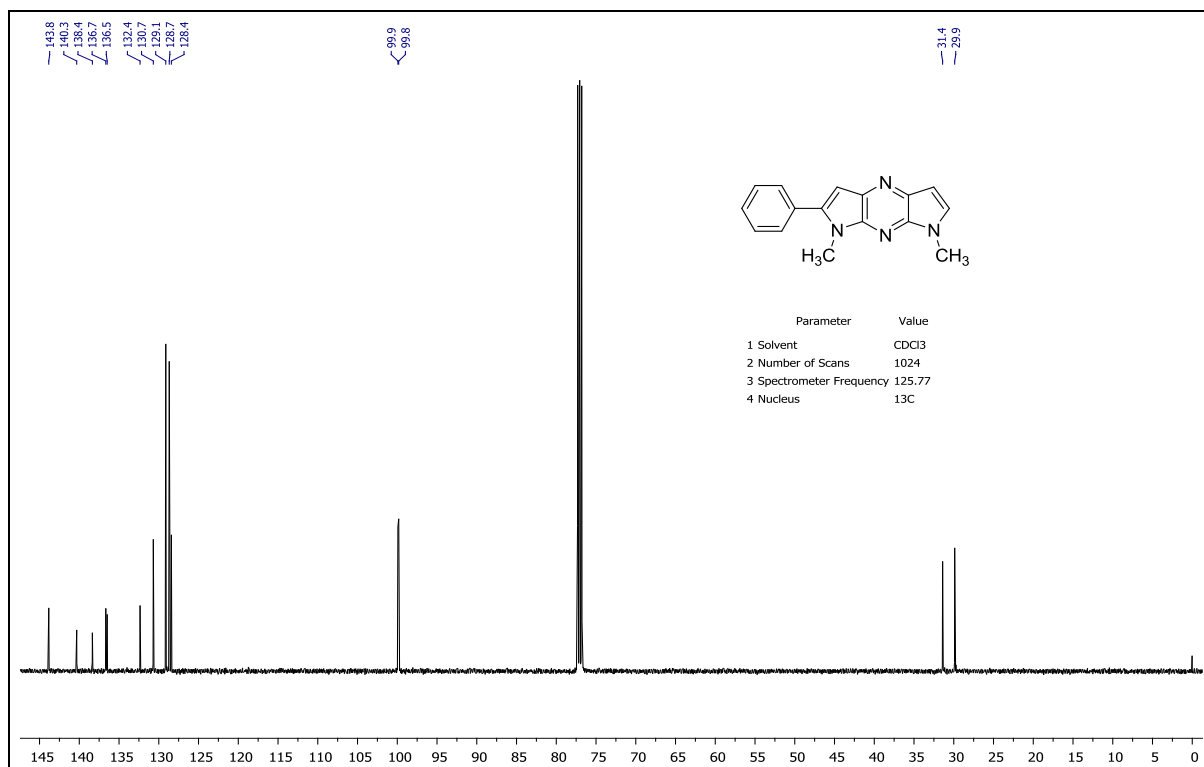

<sup>13</sup>C NMR – 6b

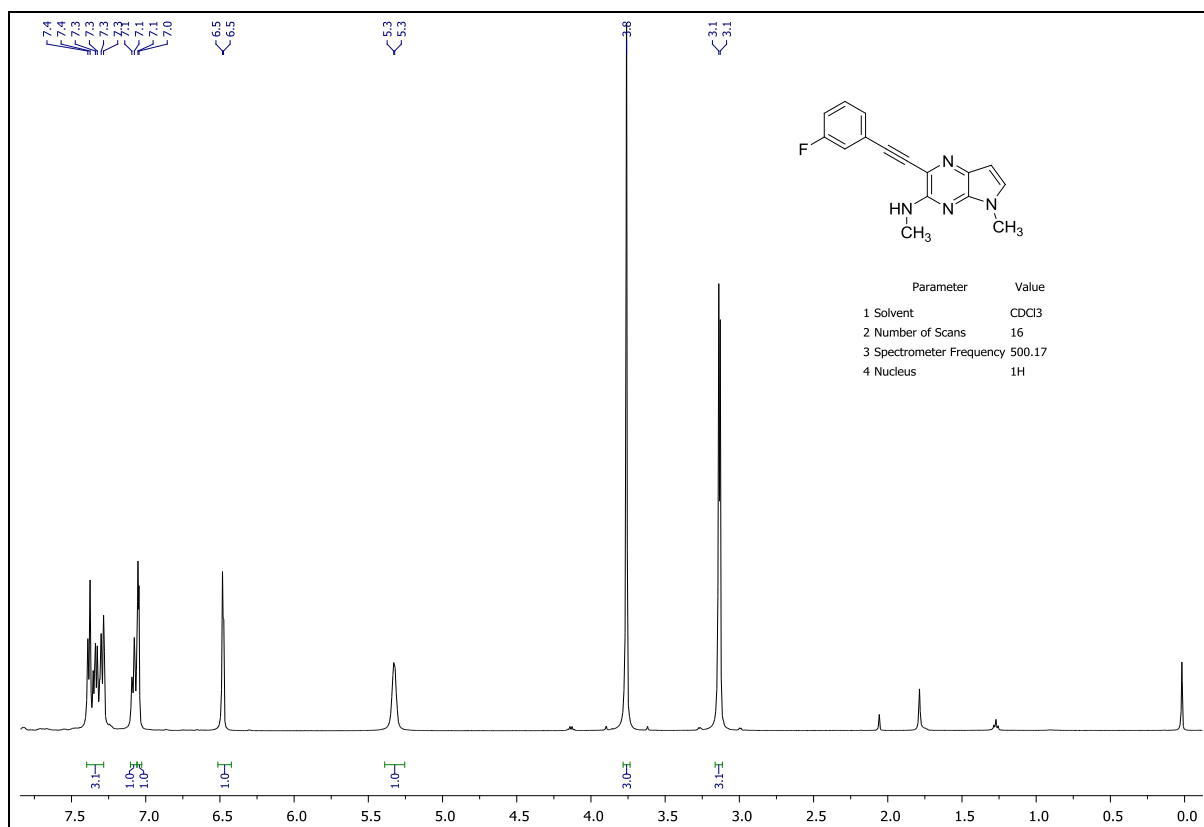

<sup>1</sup>H NMR – 6c

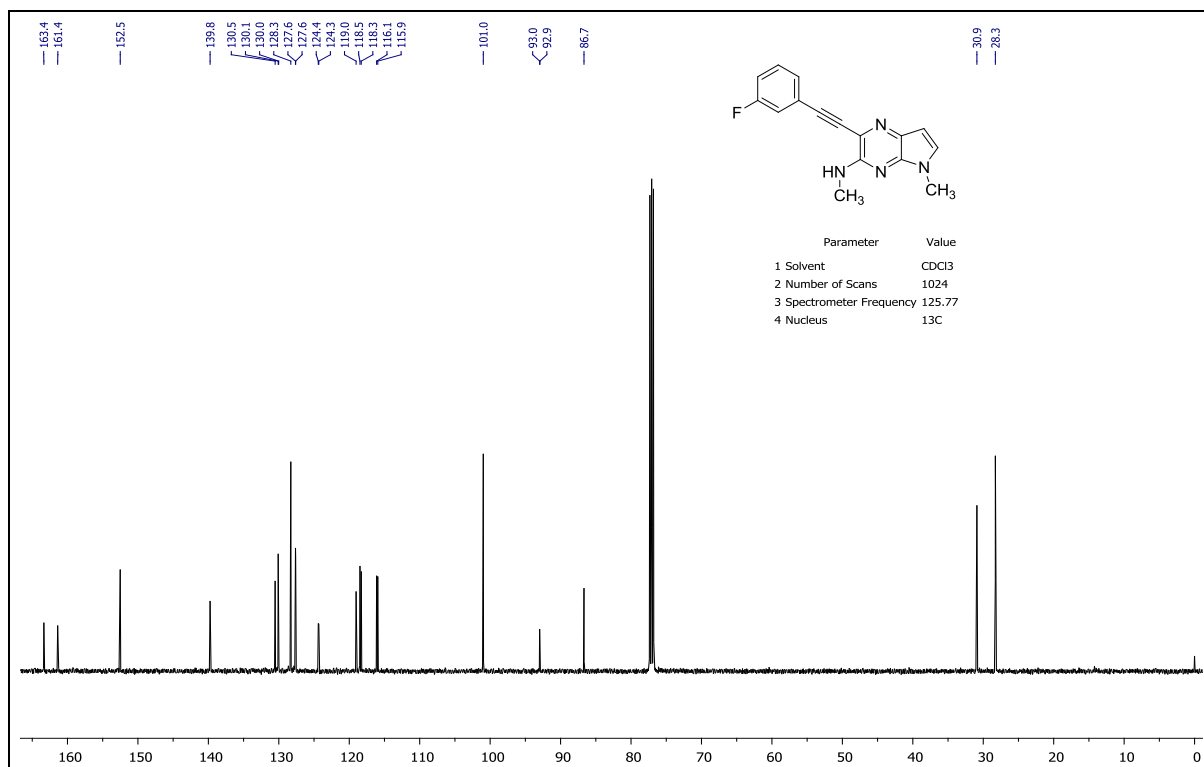

<sup>13</sup>C NMR – 6c

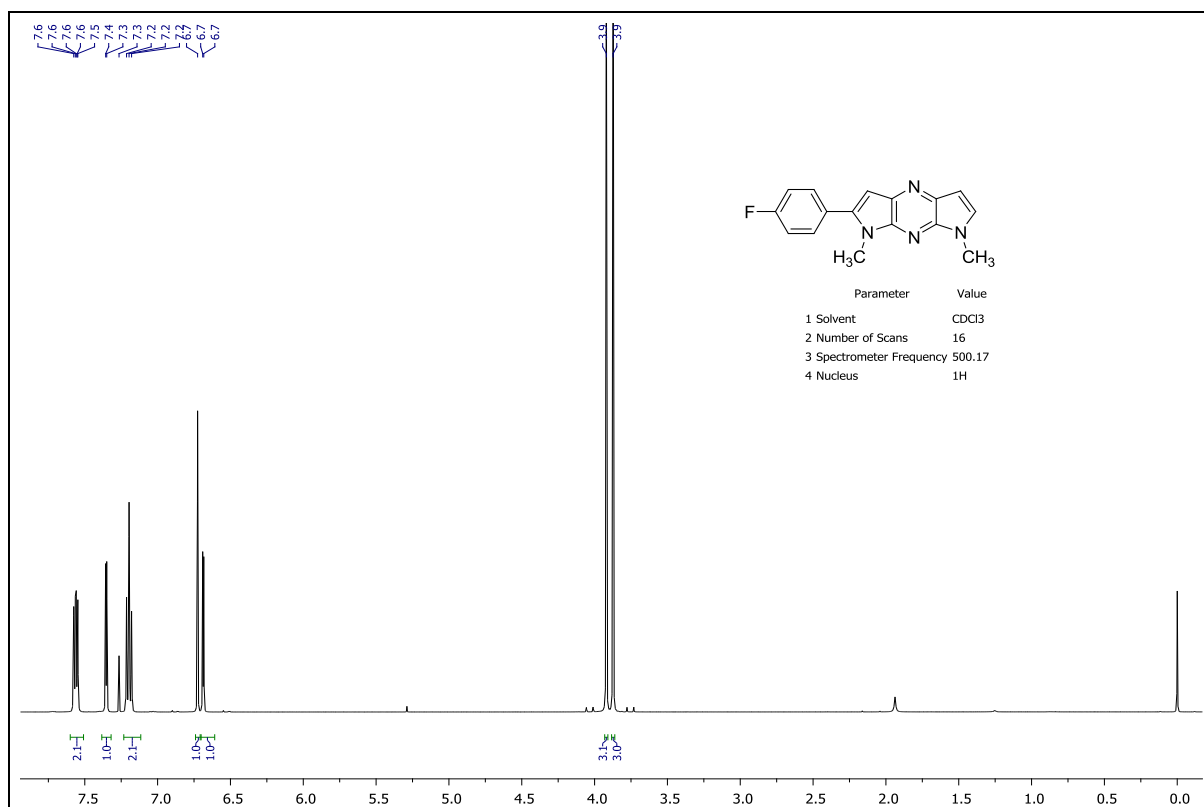

<sup>1</sup>H NMR – 6d

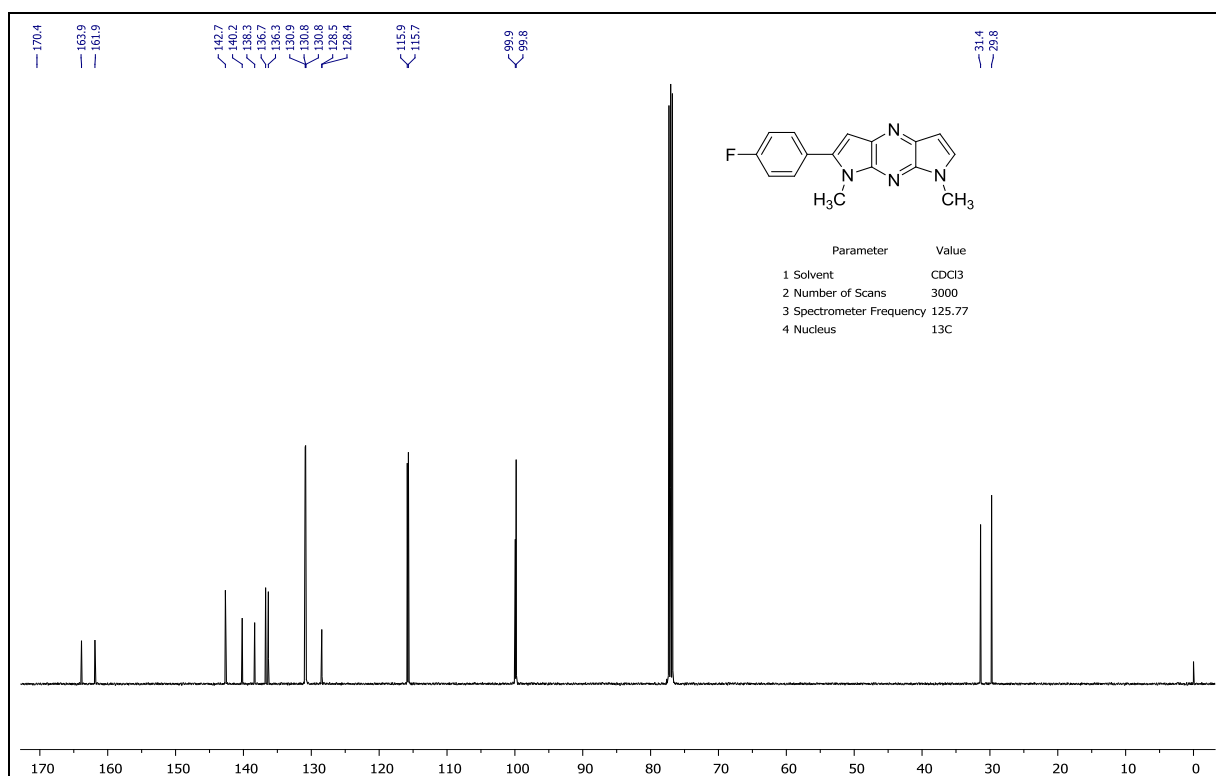

<sup>13</sup>C NMR – 6d

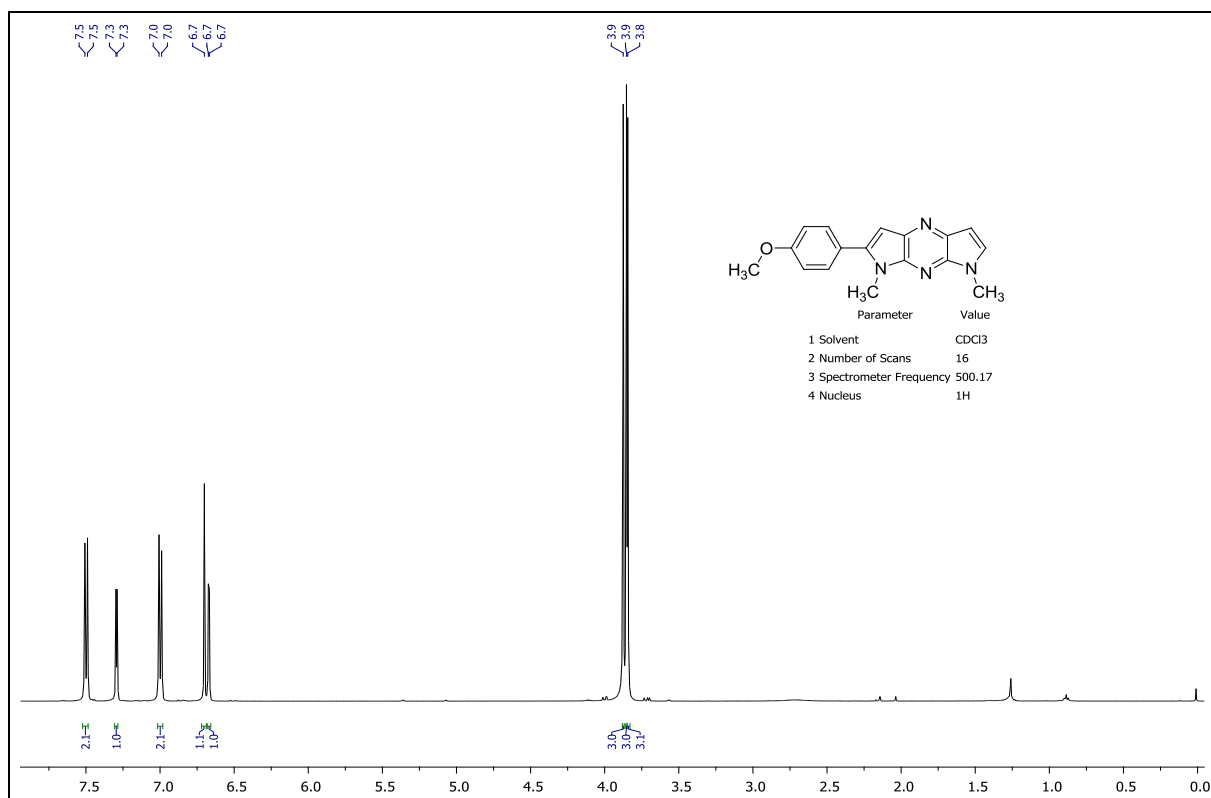

<sup>1</sup>H NMR – 6e

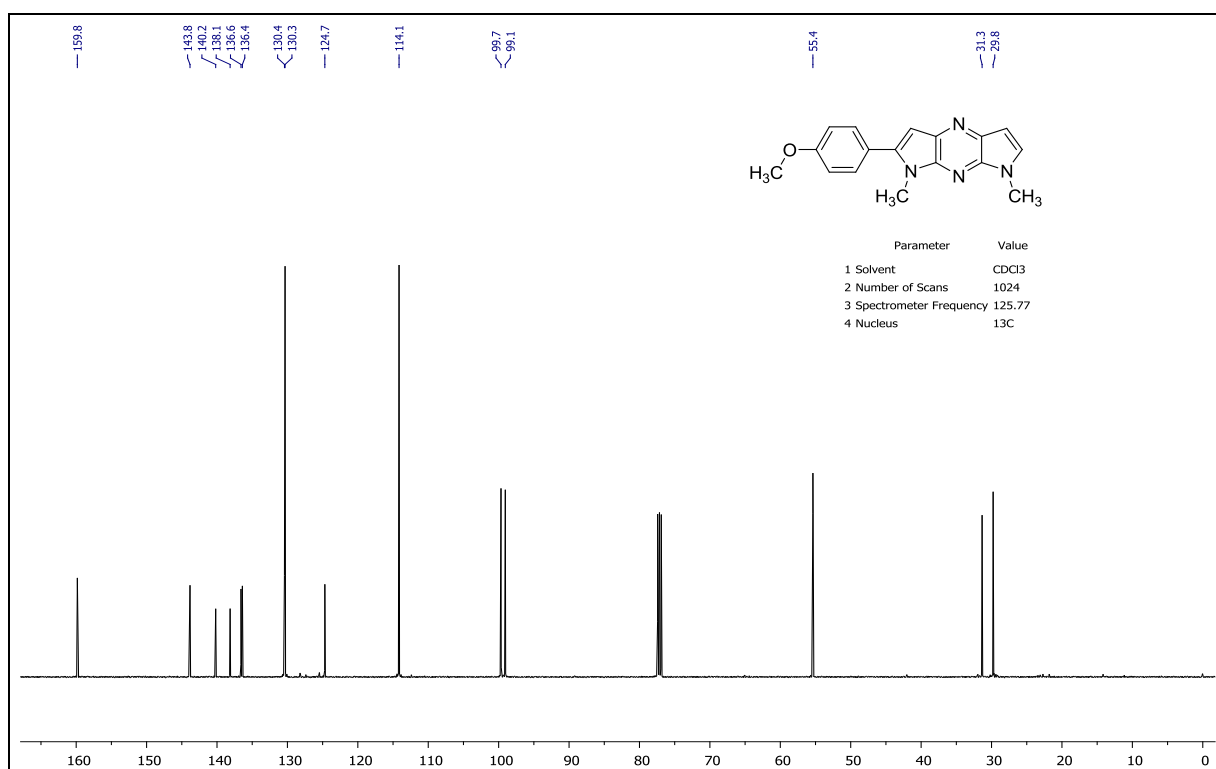

<sup>13</sup>C NMR – 6e

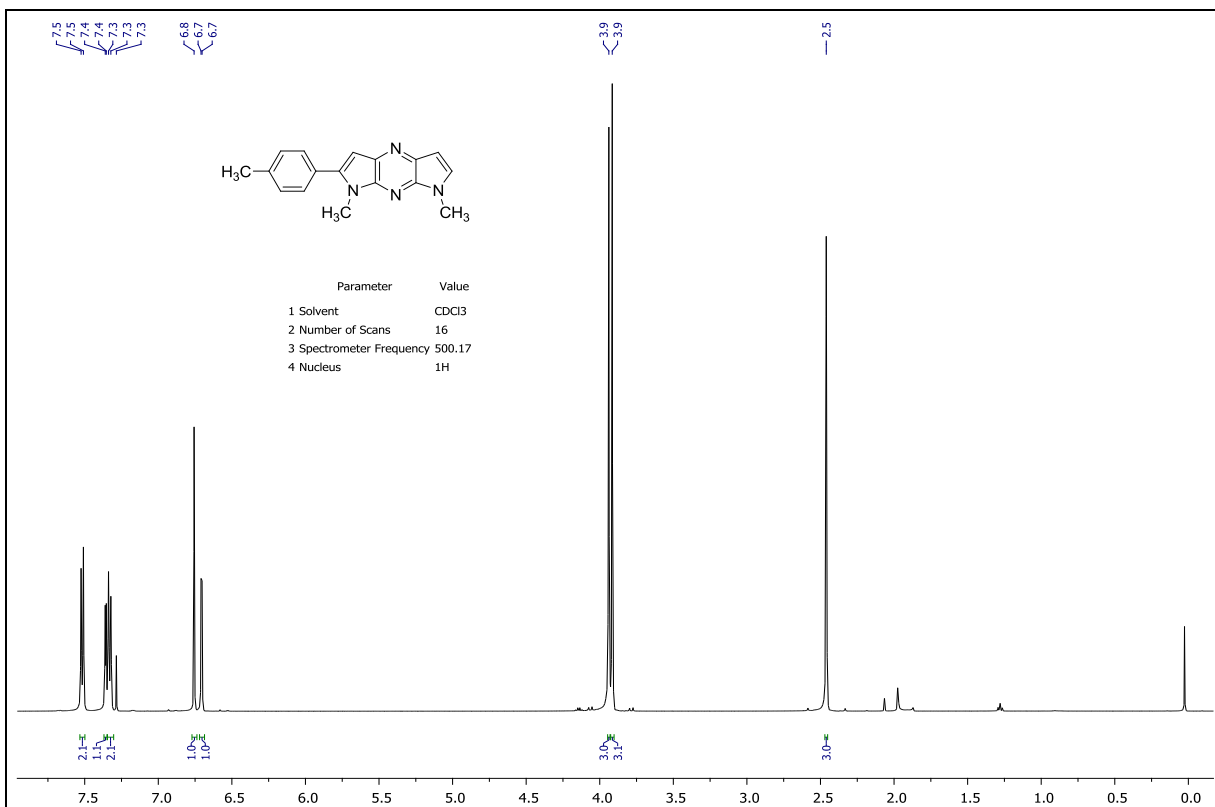

<sup>1</sup>H NMR – 6f

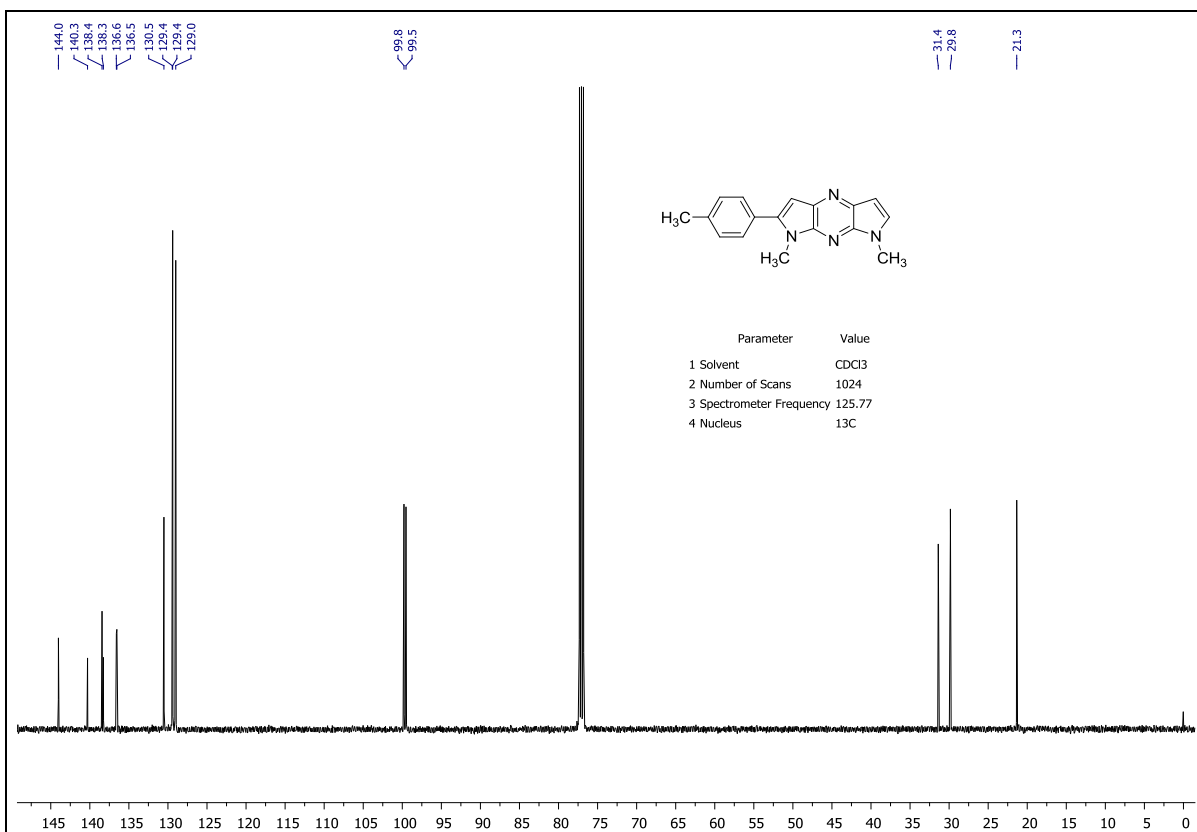

<sup>13</sup>C NMR – 6f

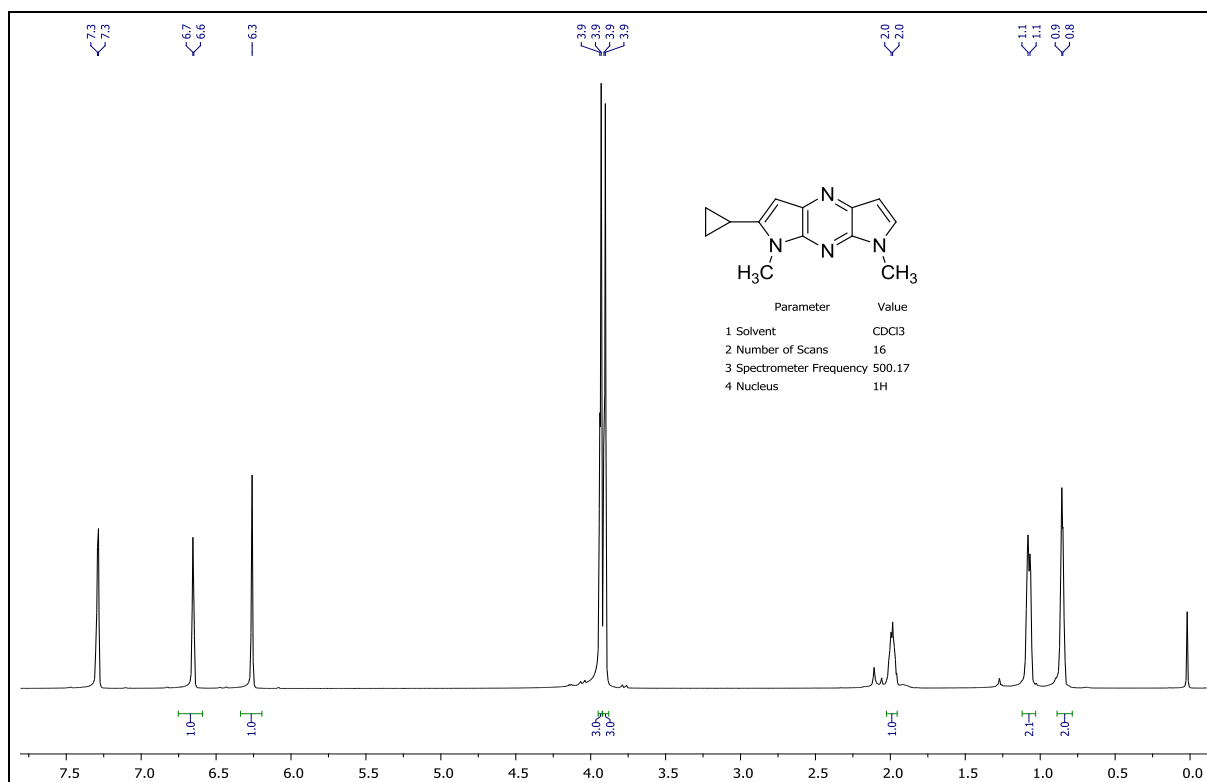

<sup>1</sup>H NMR – 6g

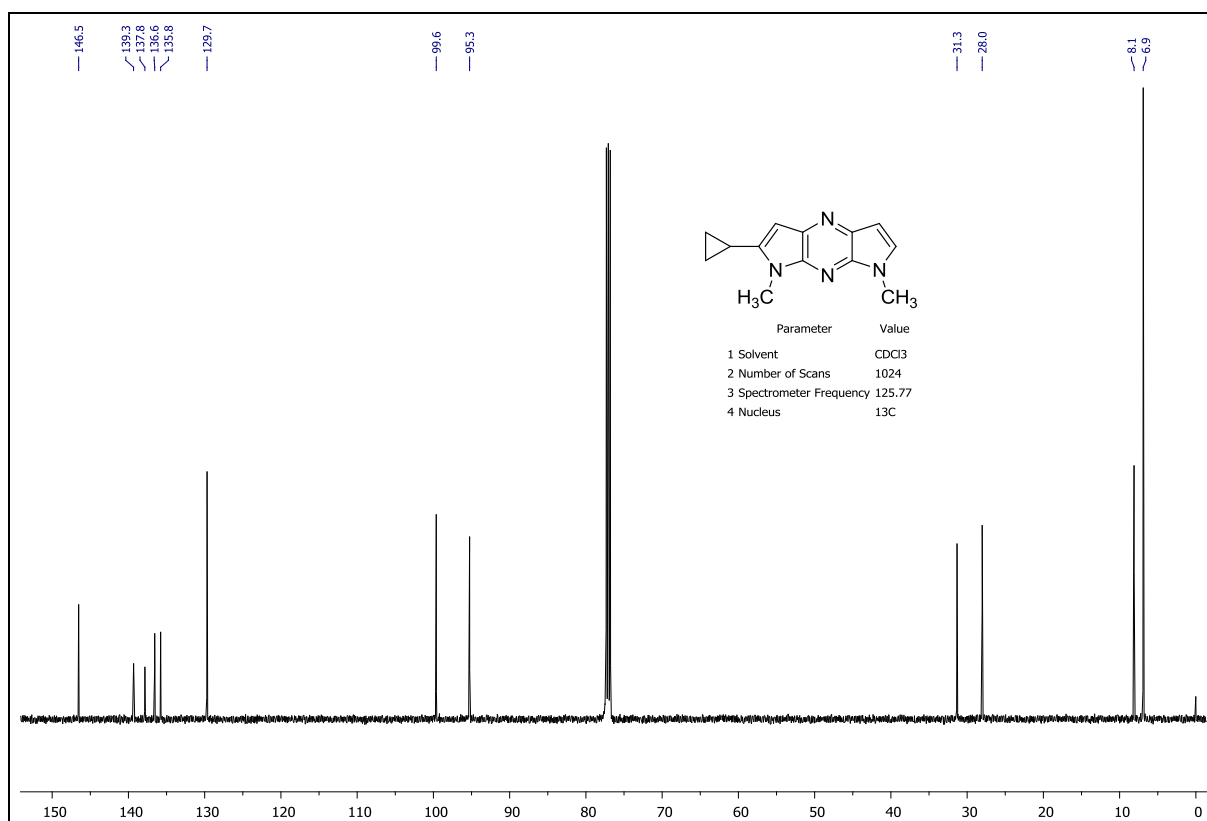

<sup>13</sup>C NMR – 6g

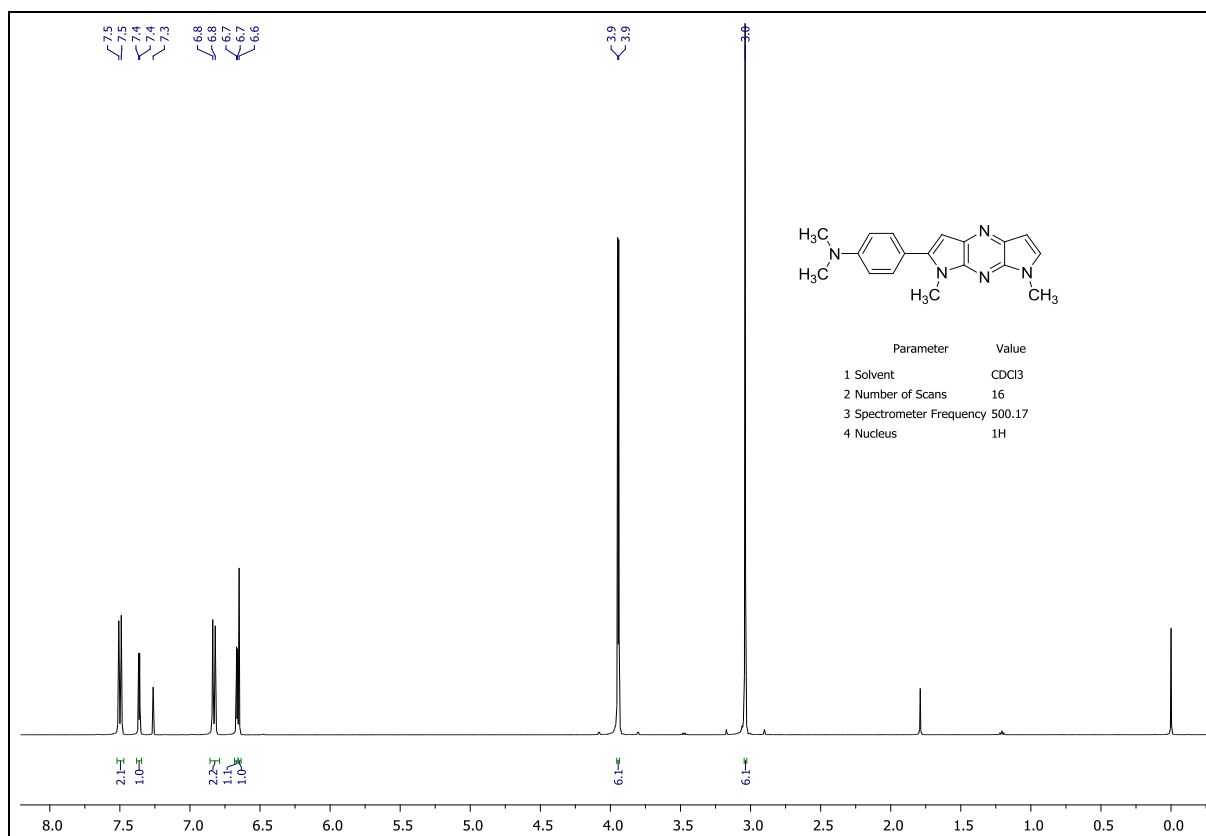

<sup>1</sup>H NMR – 6h

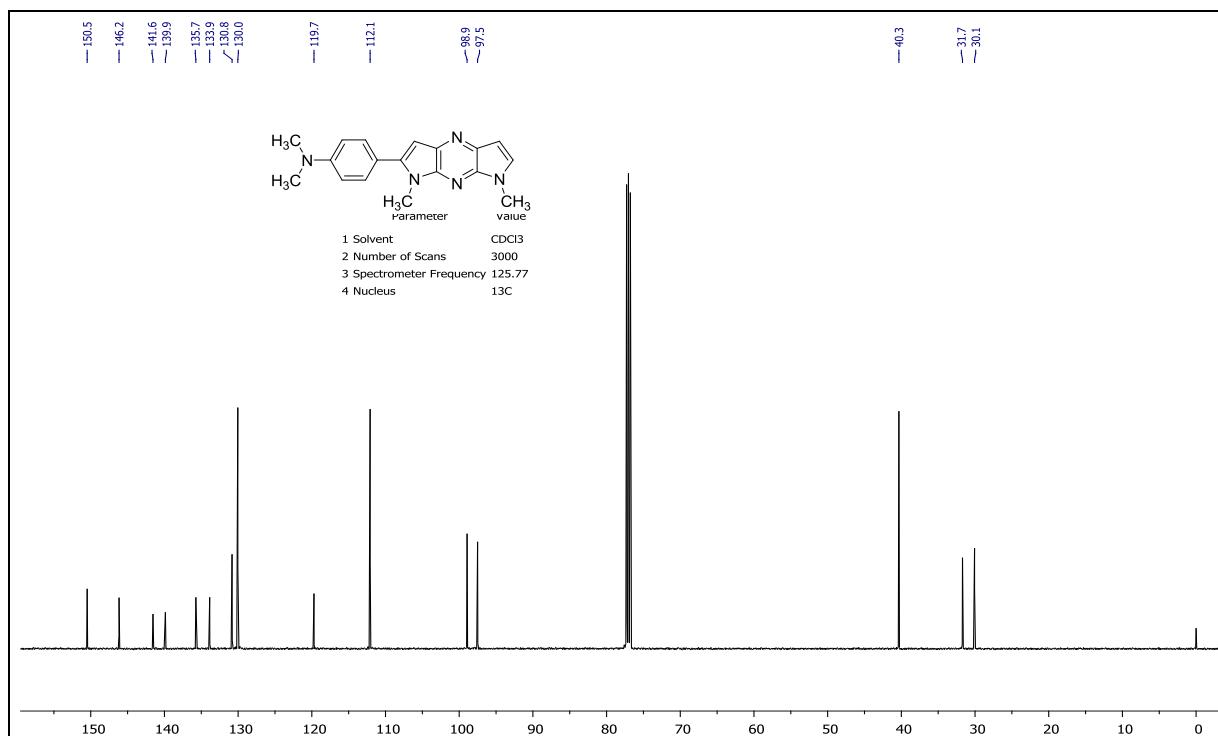

<sup>13</sup>C NMR – 6h



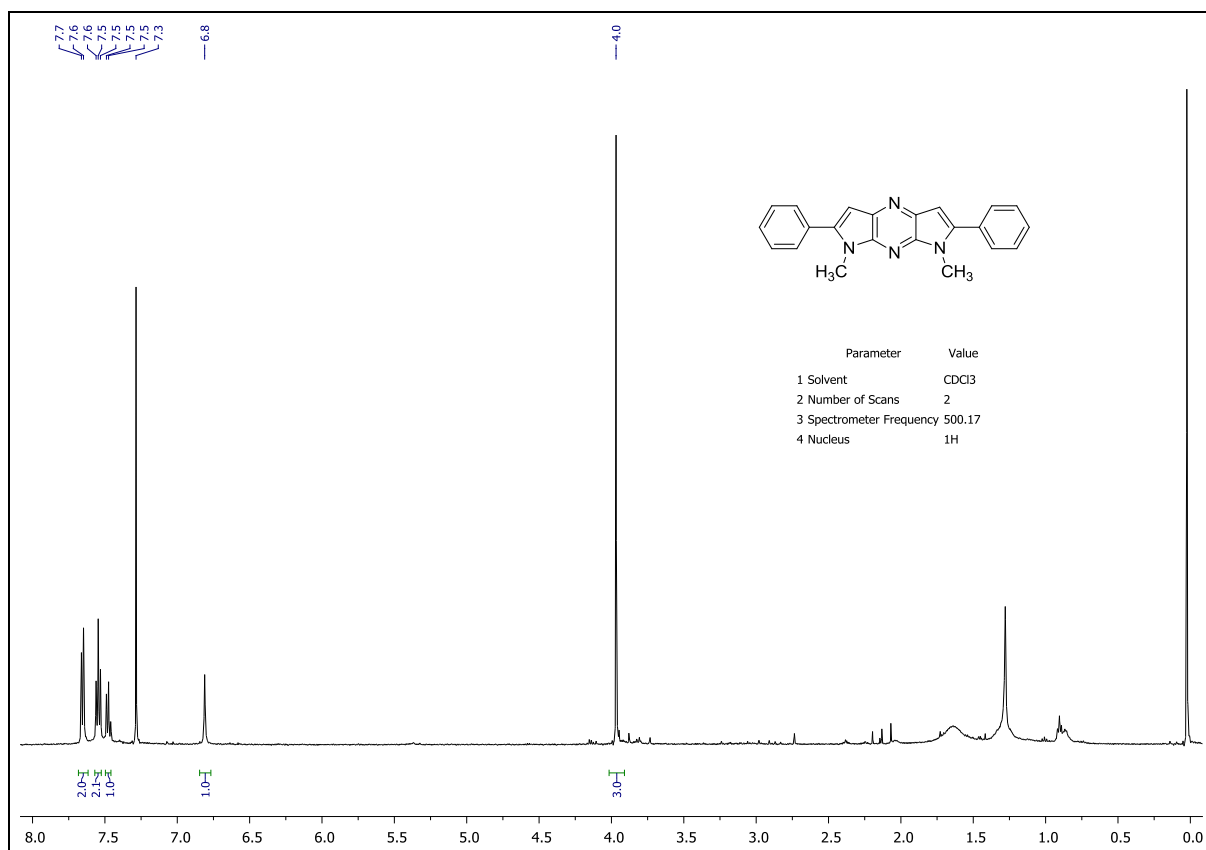

<sup>1</sup>H NMR – 6i

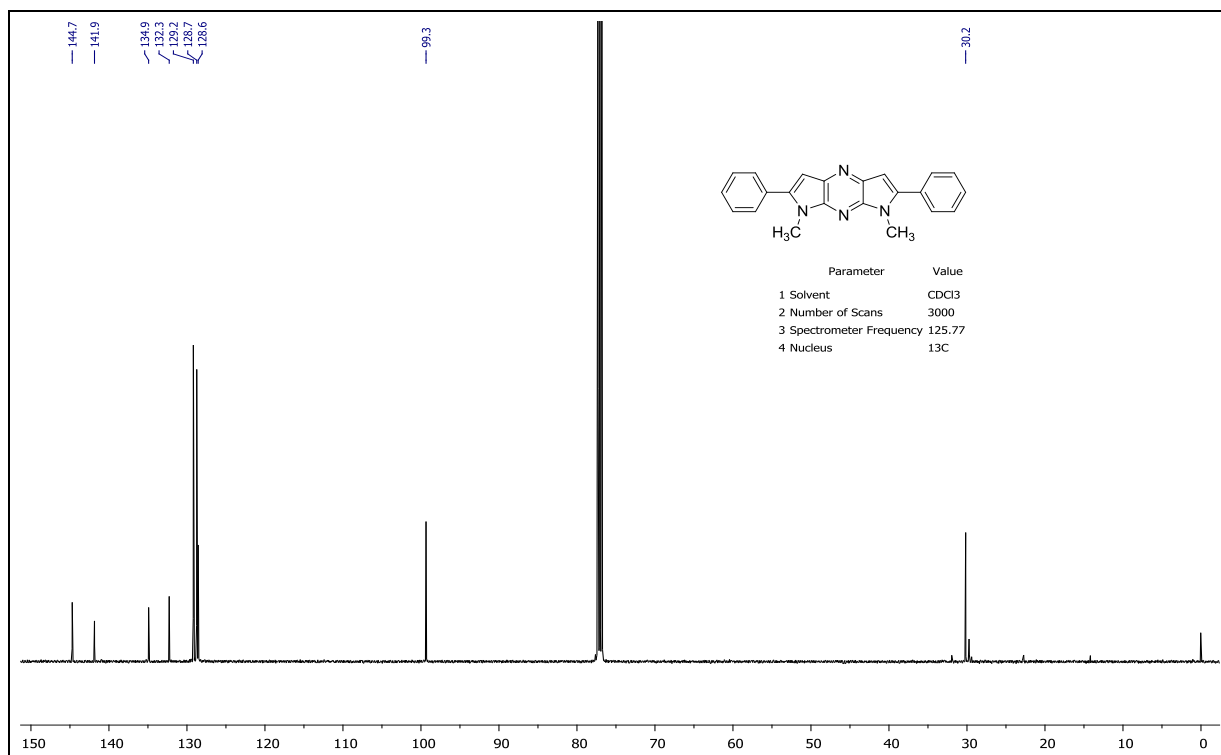

<sup>13</sup>C NMR – 6i

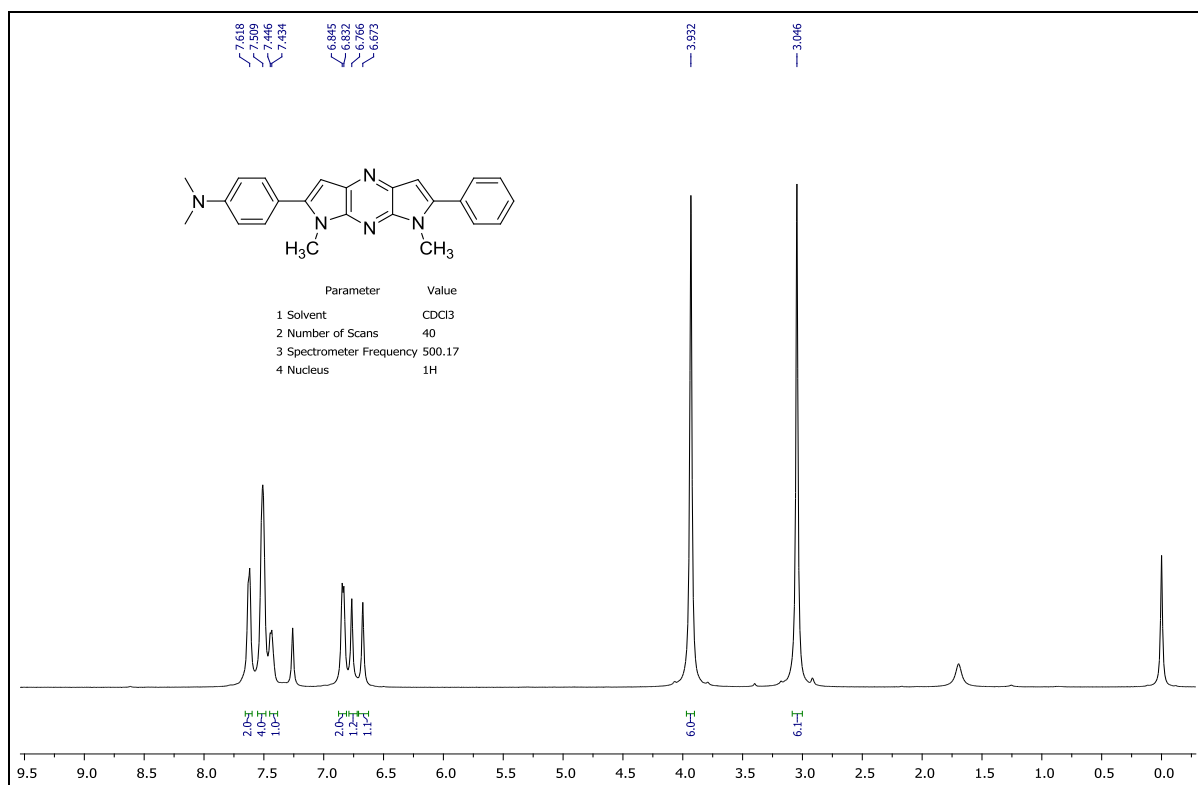

<sup>1</sup>H NMR – 6j

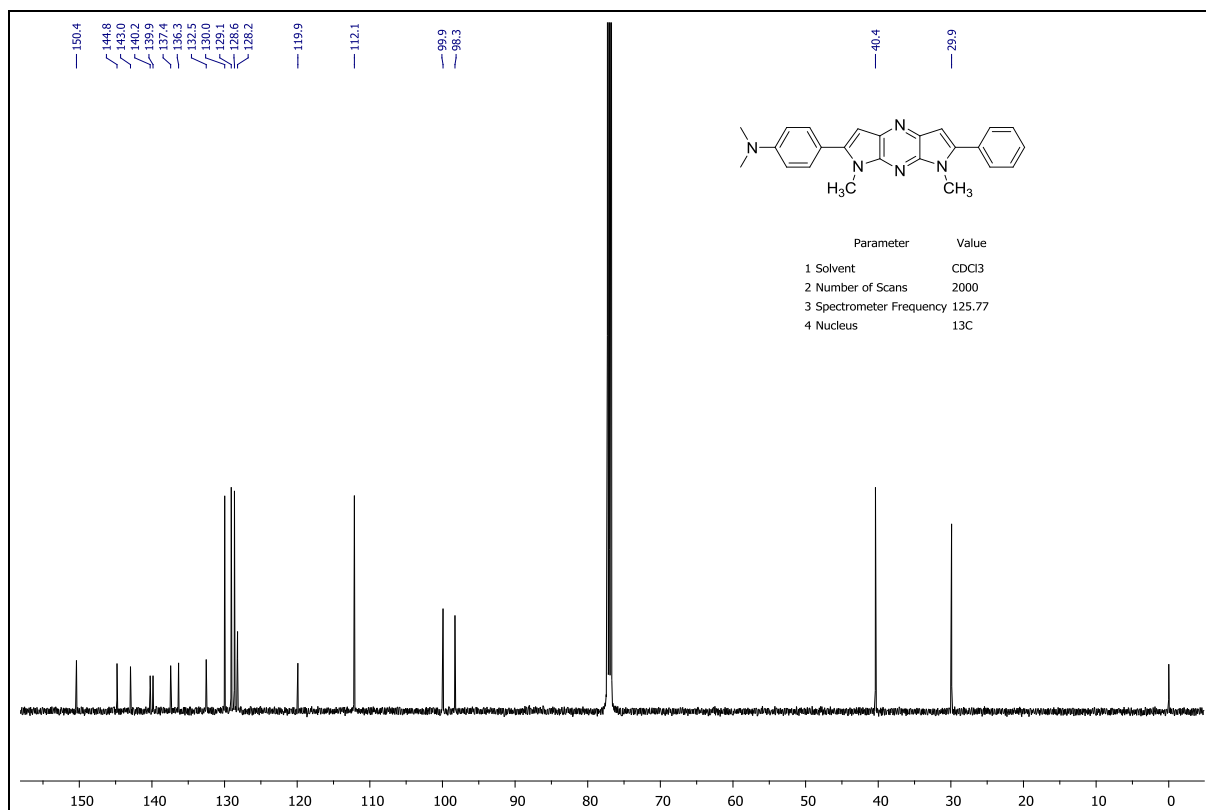

<sup>13</sup>C NMR – 6j

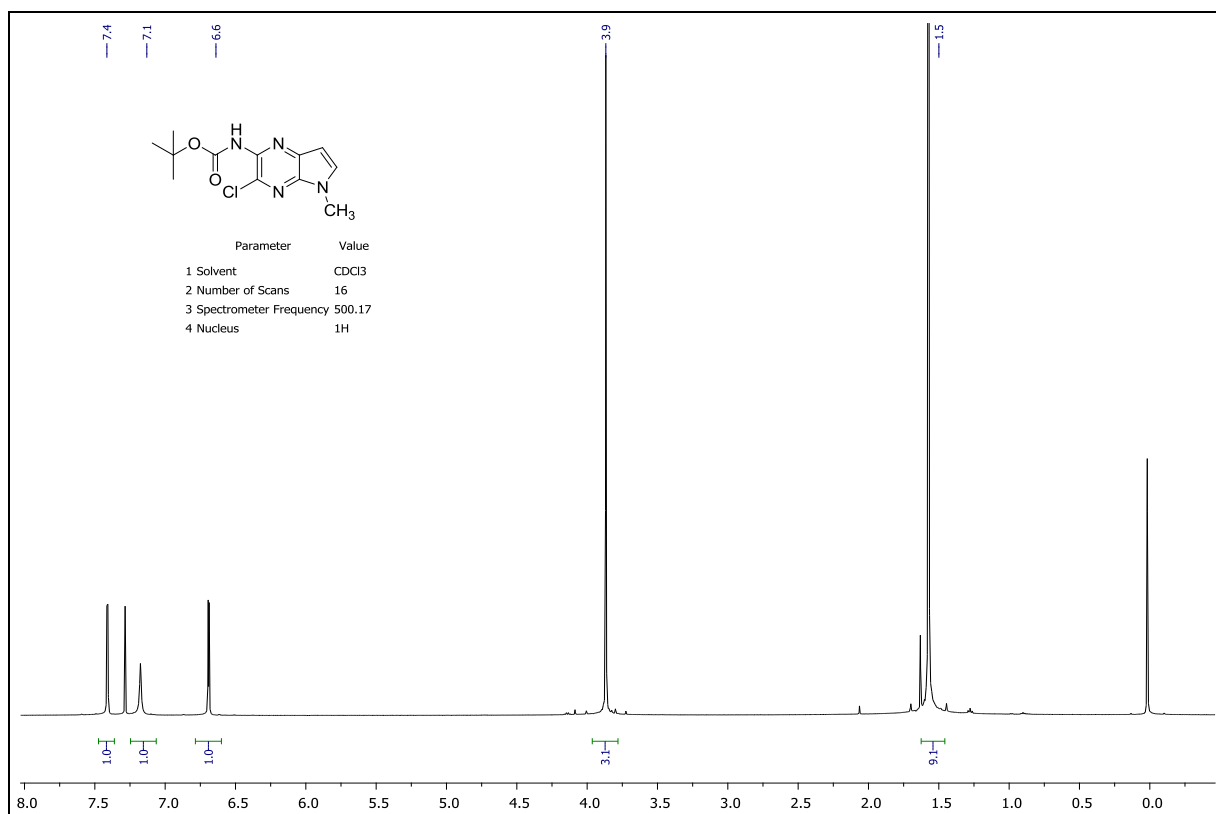

<sup>1</sup>H NMR – 7a

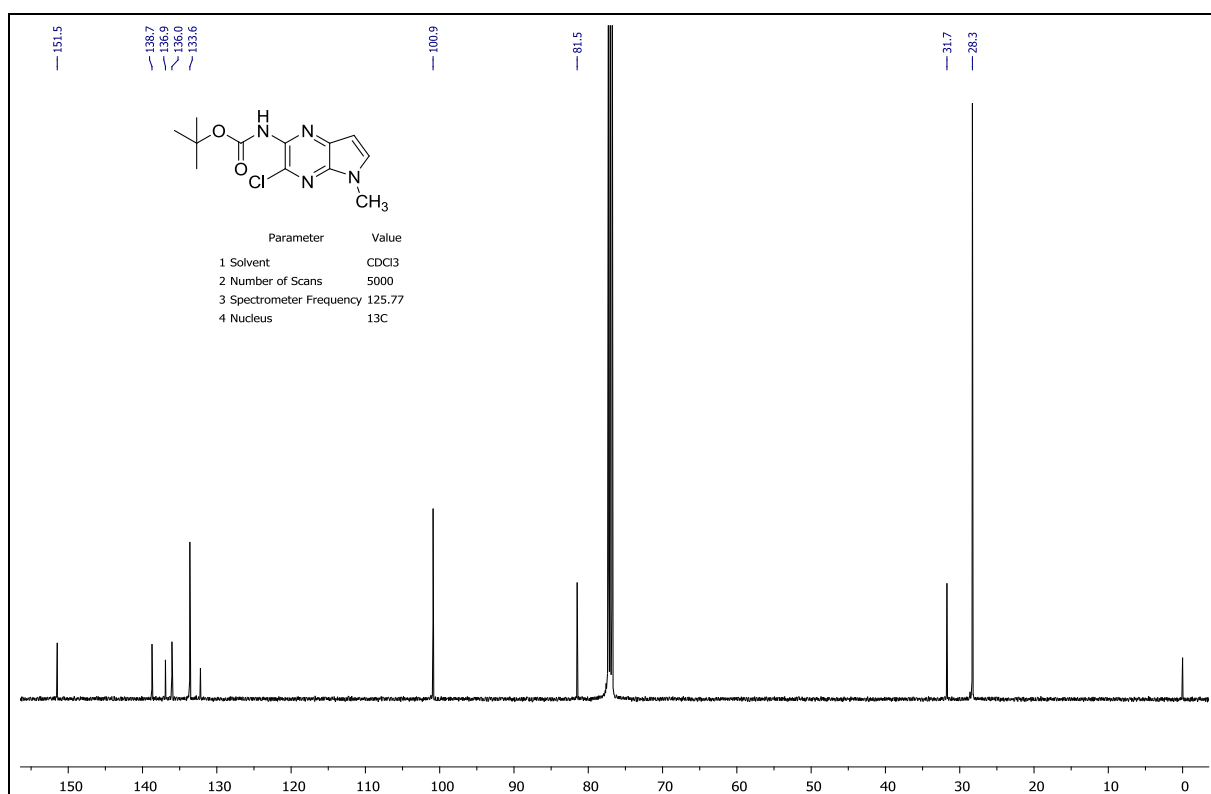

<sup>13</sup>C NMR – 7a

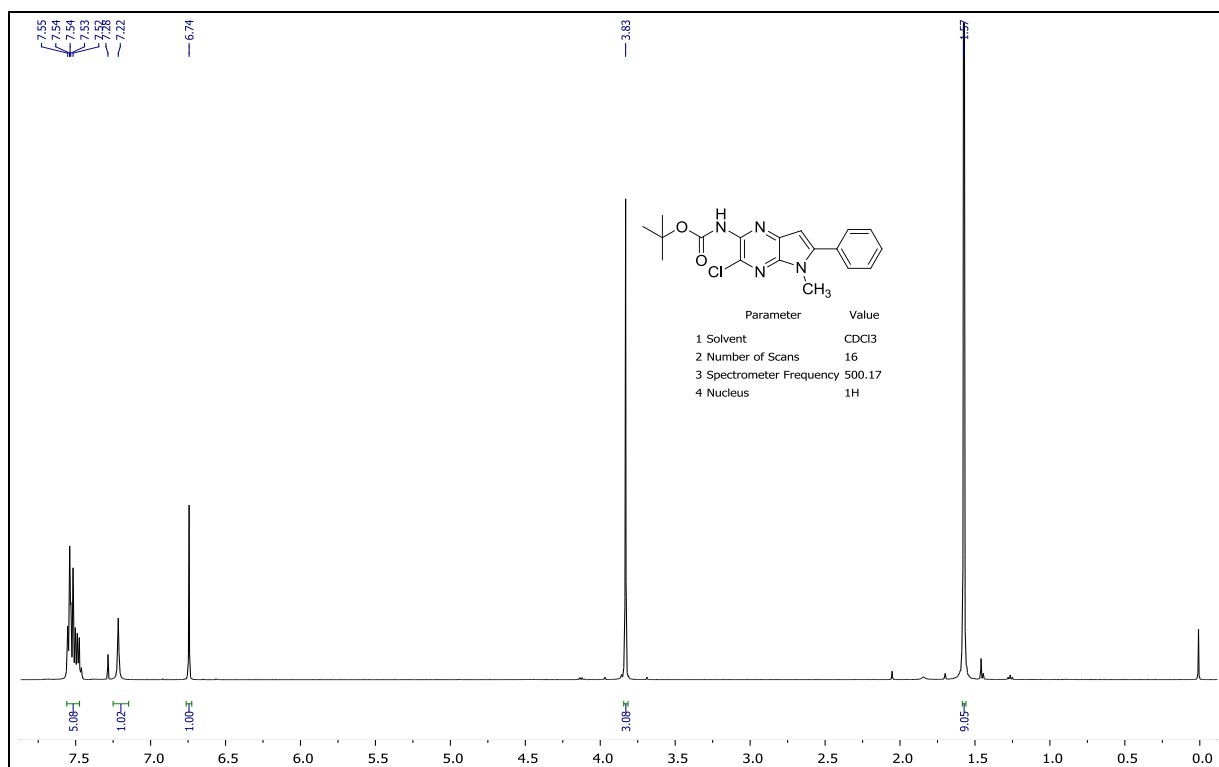

<sup>1</sup>H NMR – 7b

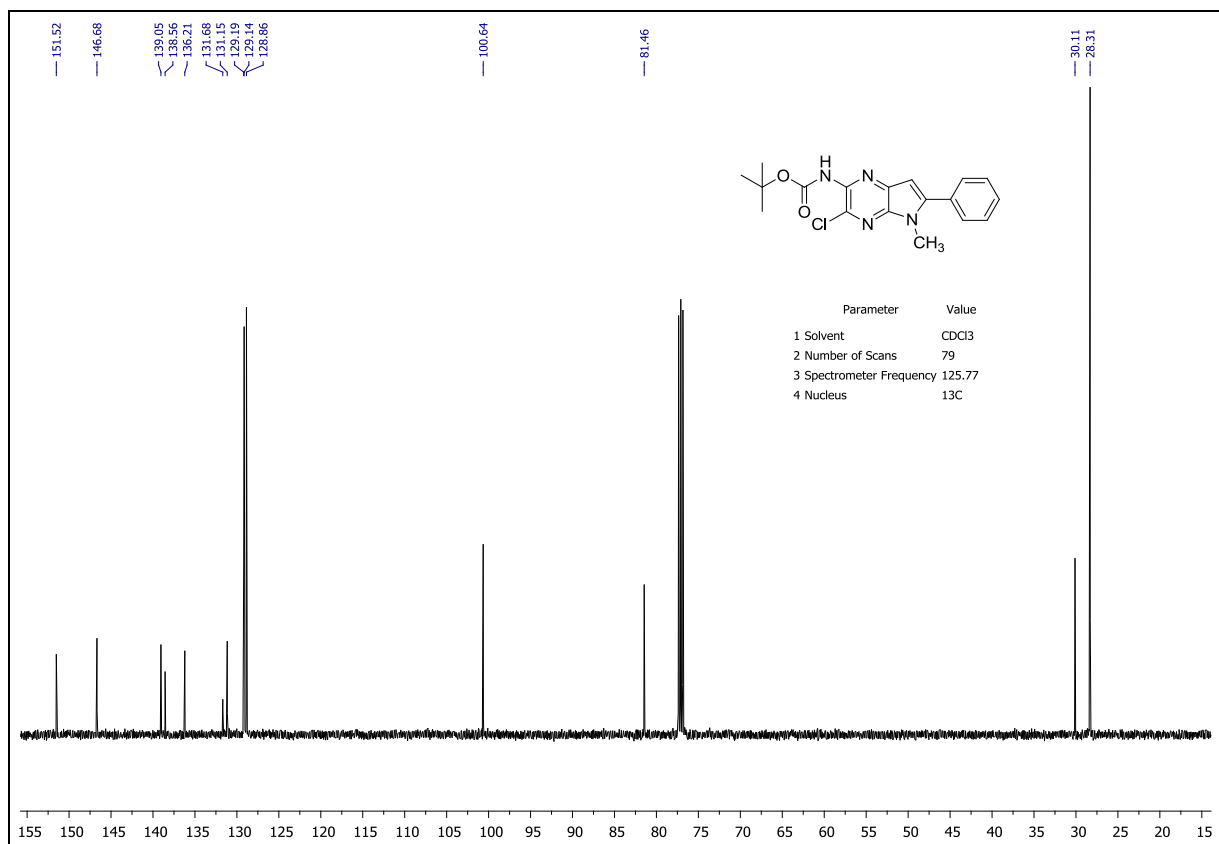

<sup>13</sup>C NMR – 7b

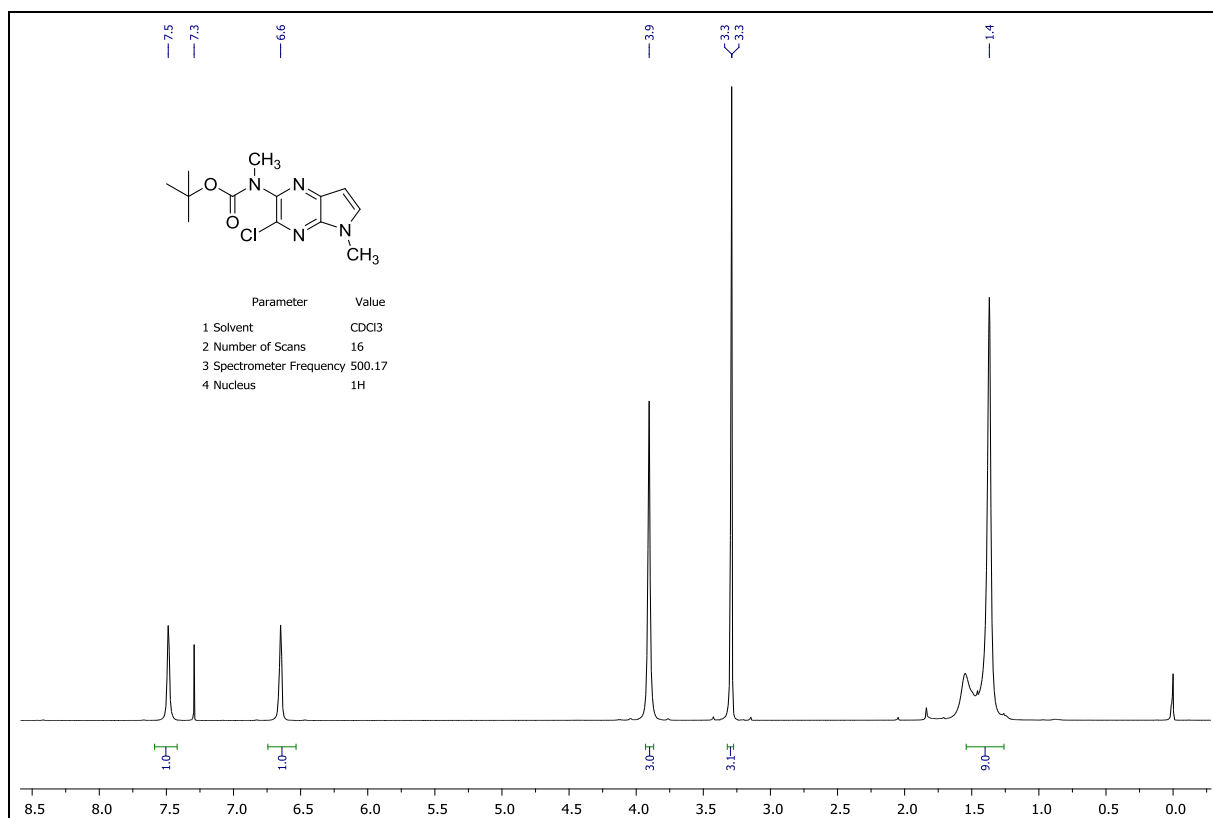

<sup>1</sup>H NMR – 8a

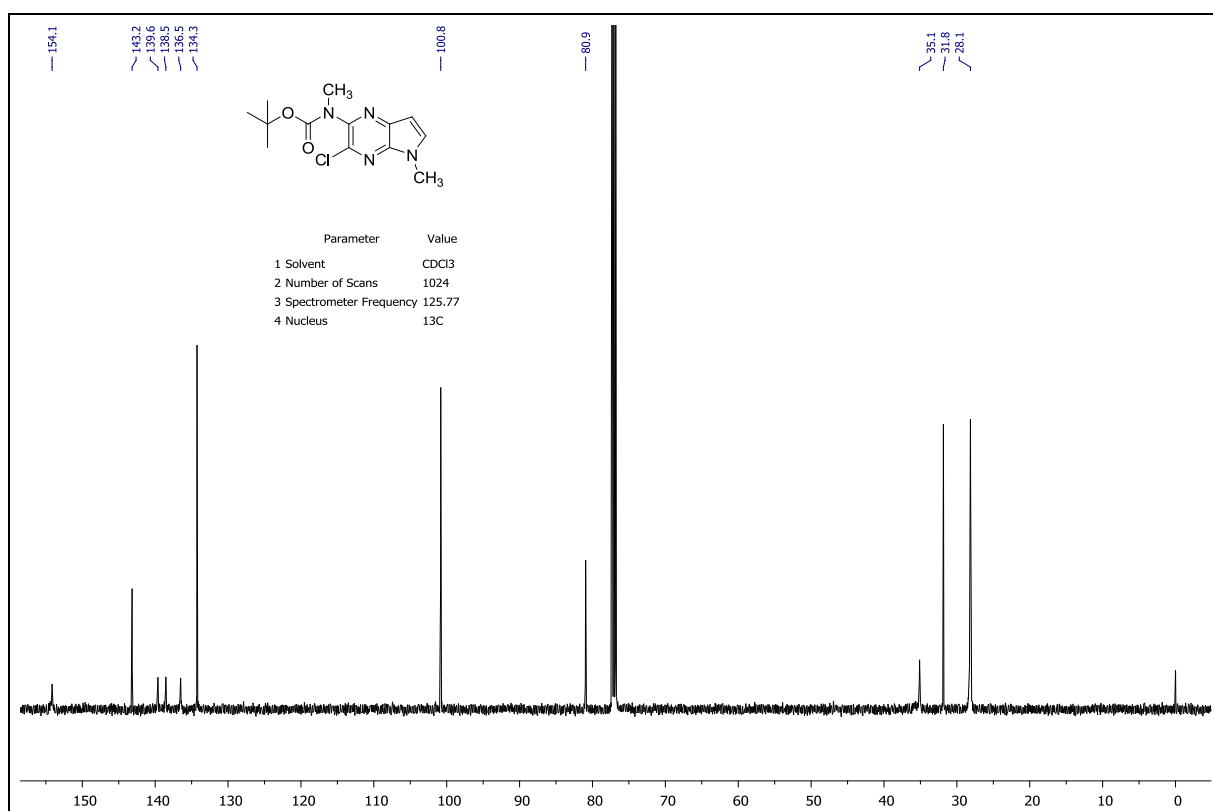

<sup>13</sup>C NMR – 8a

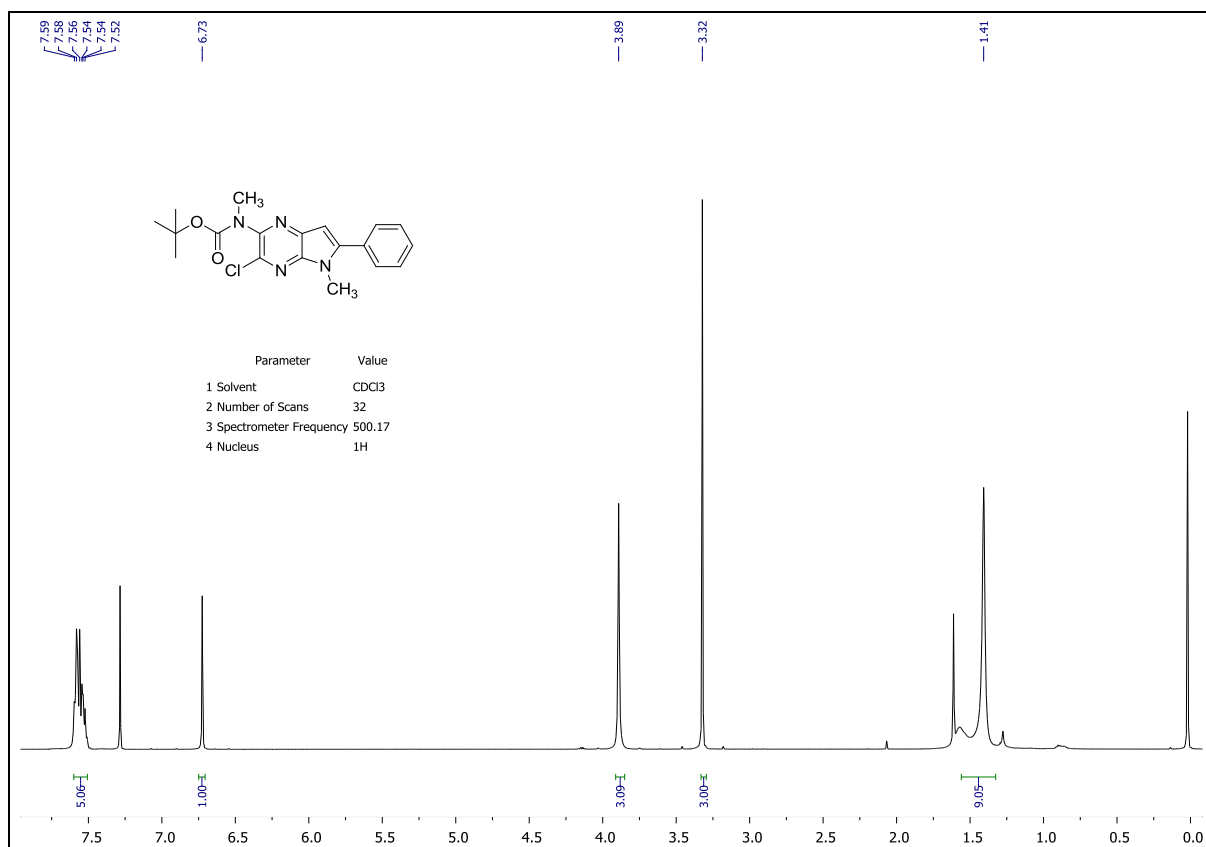

<sup>1</sup>H NMR – 8b

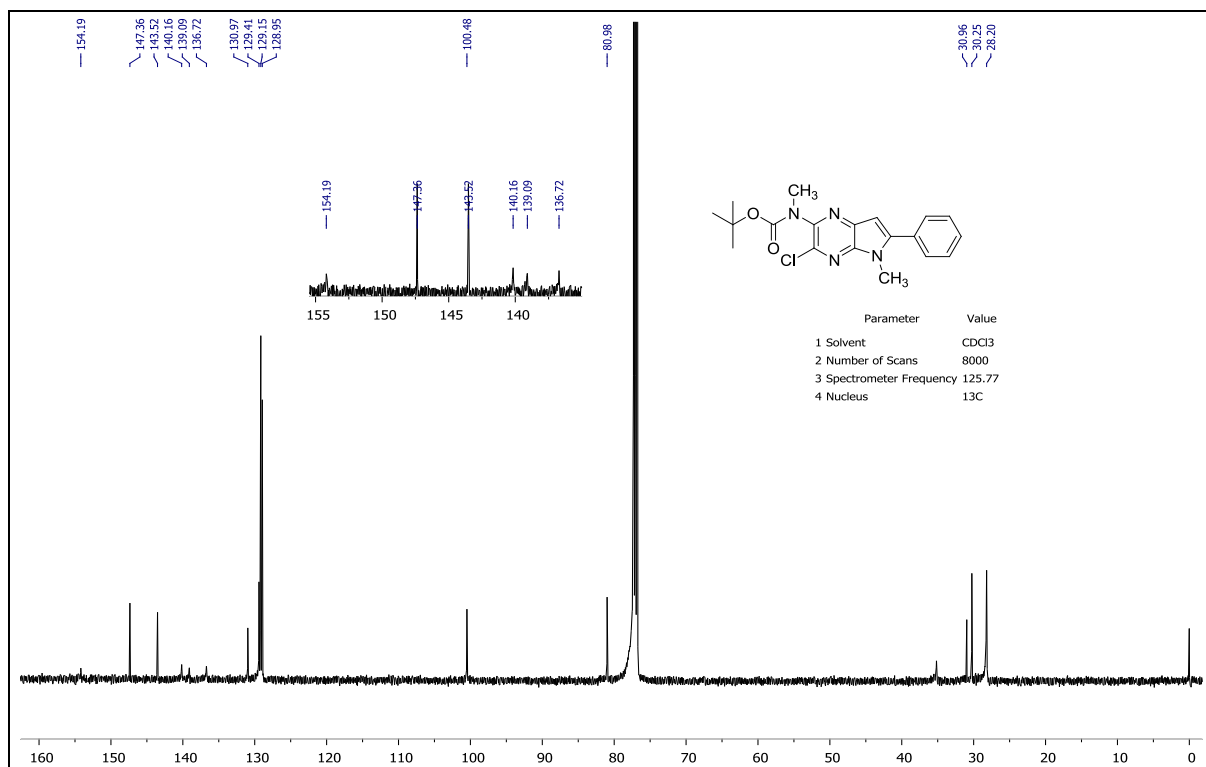

<sup>13</sup>C NMR – 8b

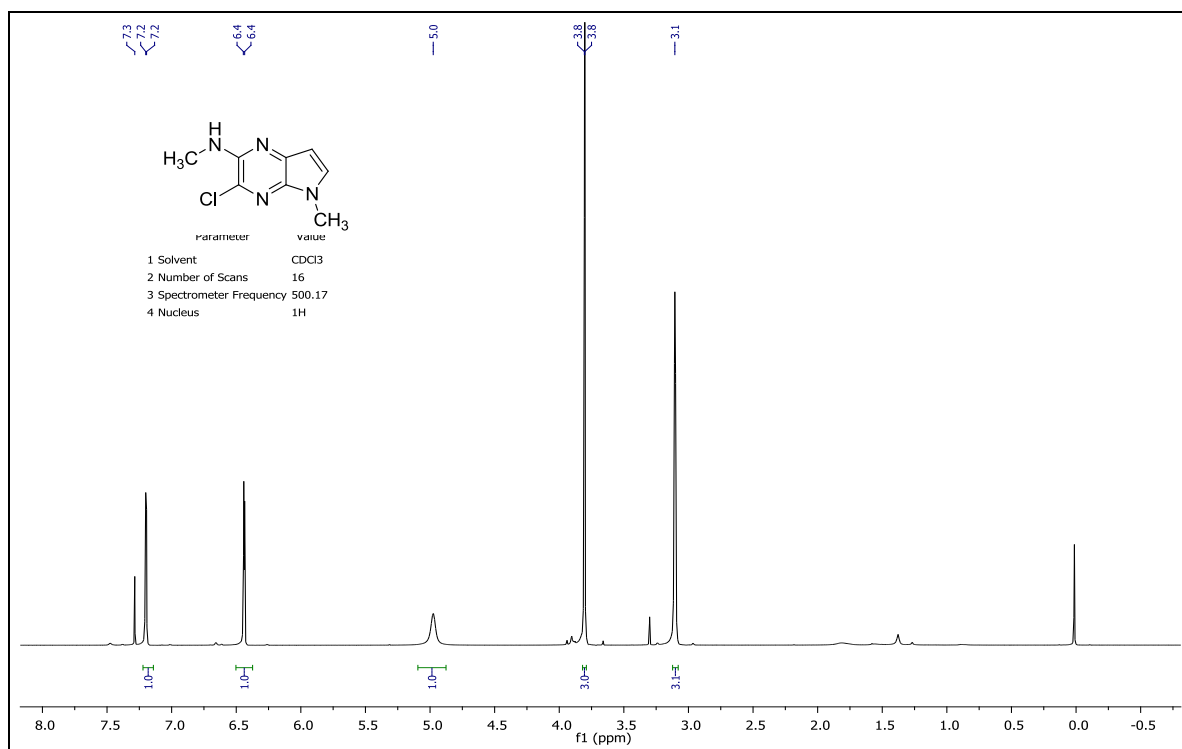

**<sup>1</sup>H NMR – 9a**

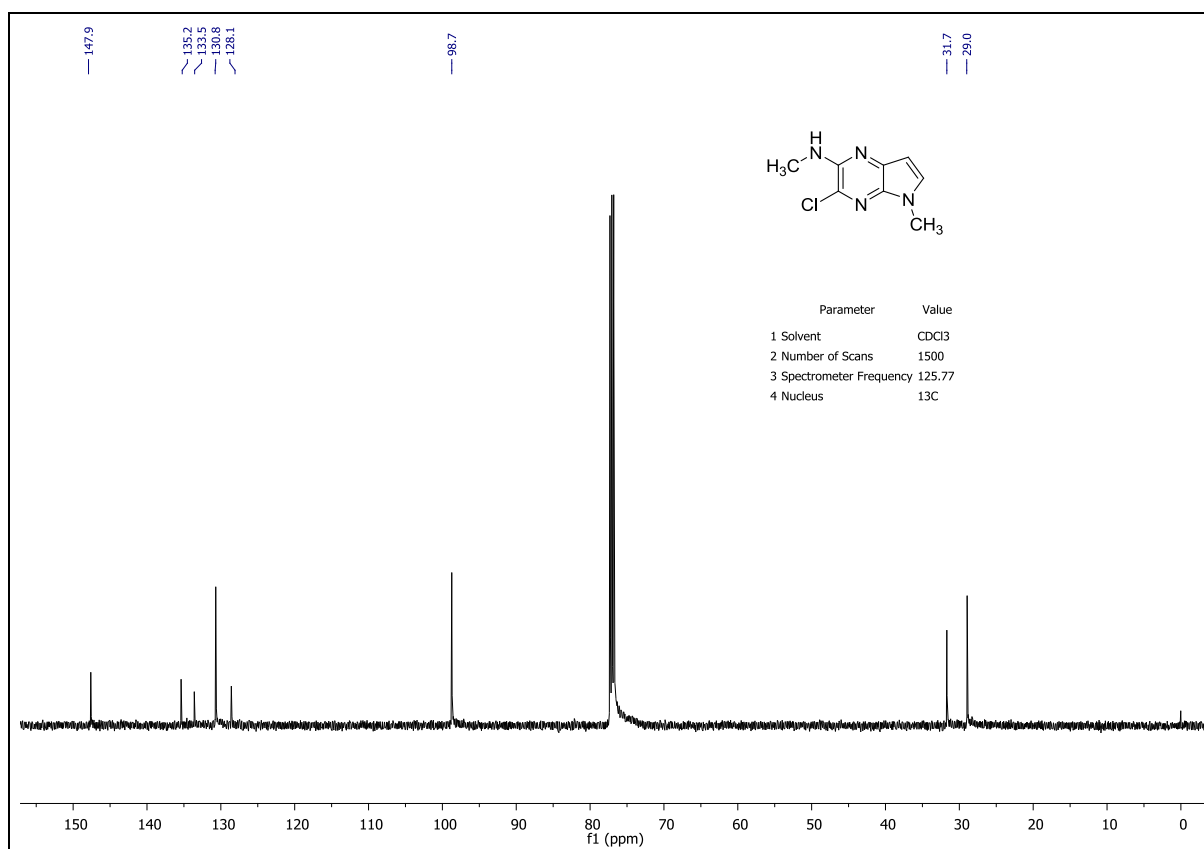

**<sup>13</sup>C NMR – 9a**

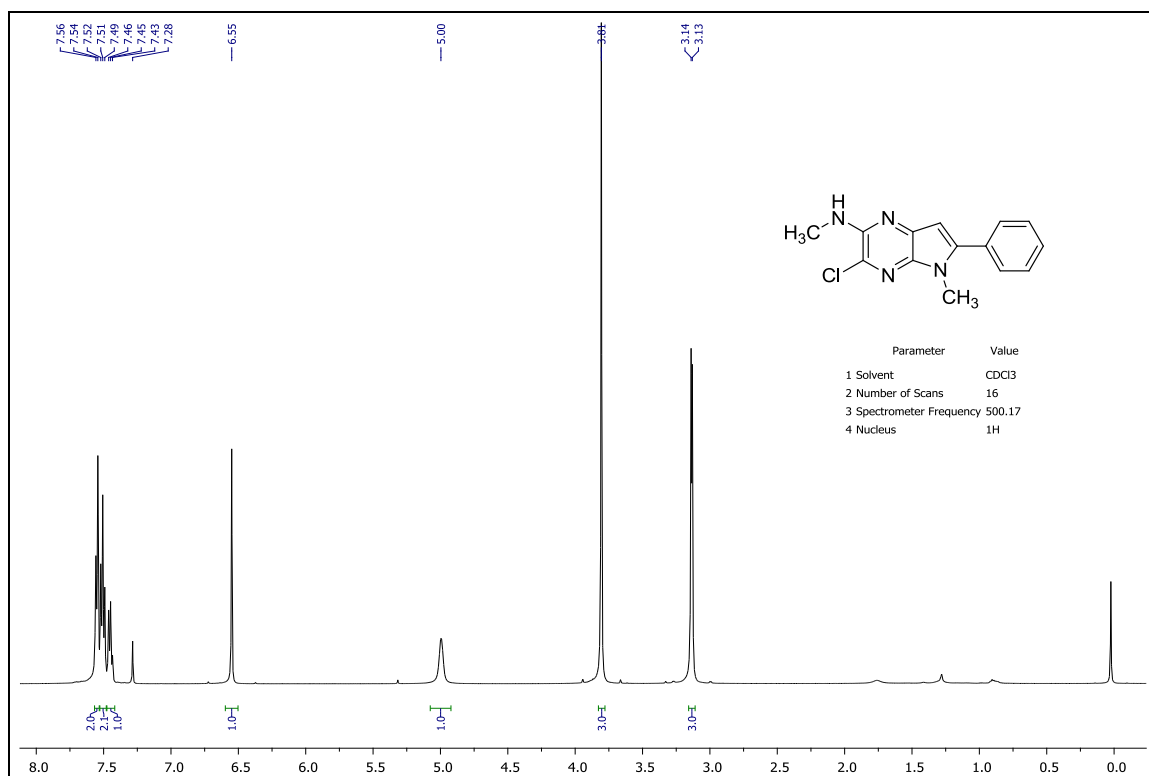

**<sup>1</sup>H NMR – 9b**

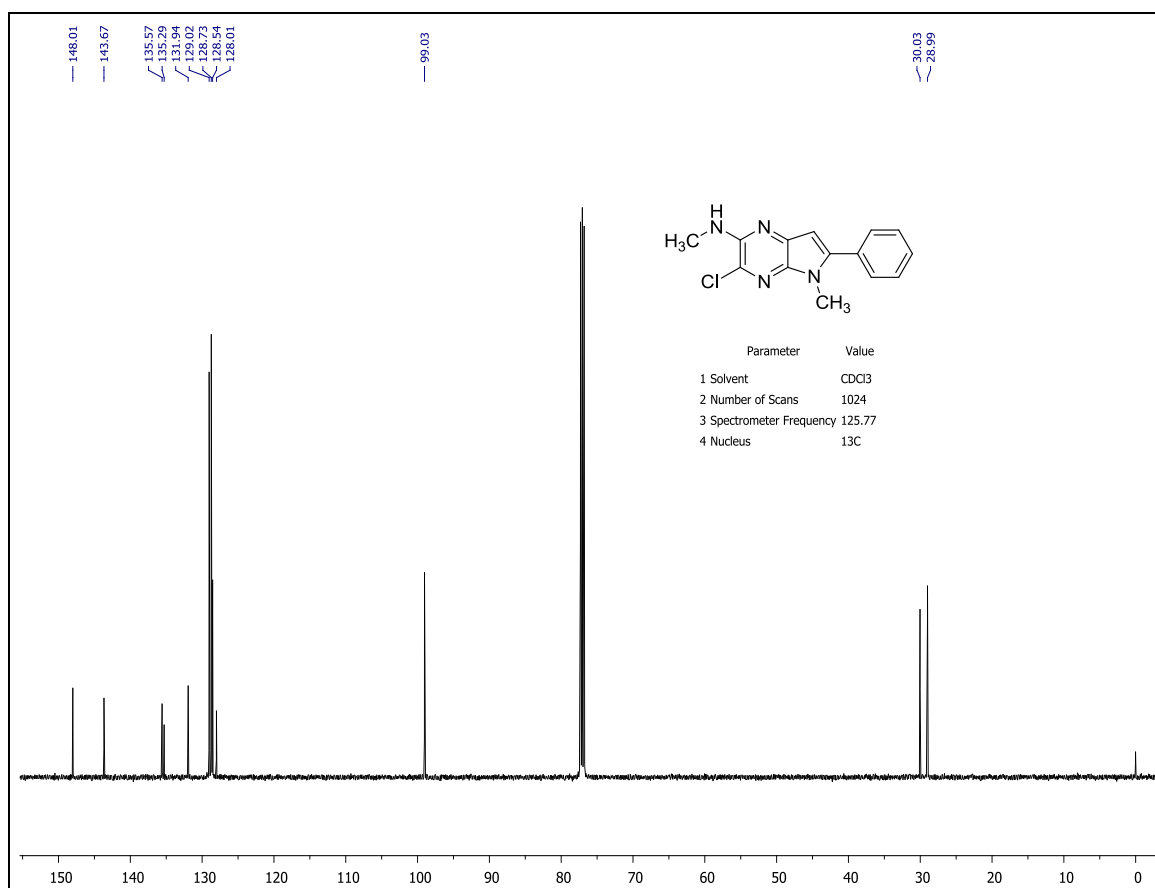

**<sup>13</sup>C NMR – 9b**



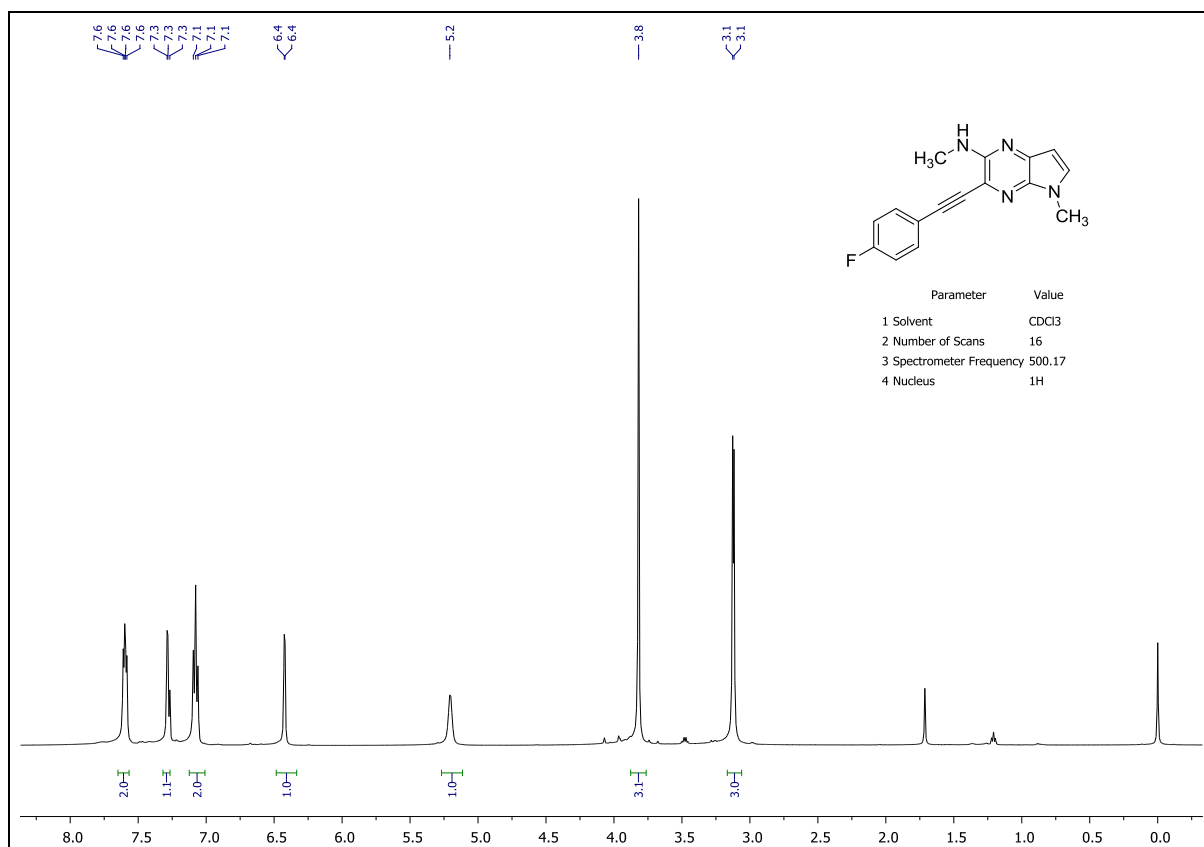

<sup>1</sup>H NMR – 10c

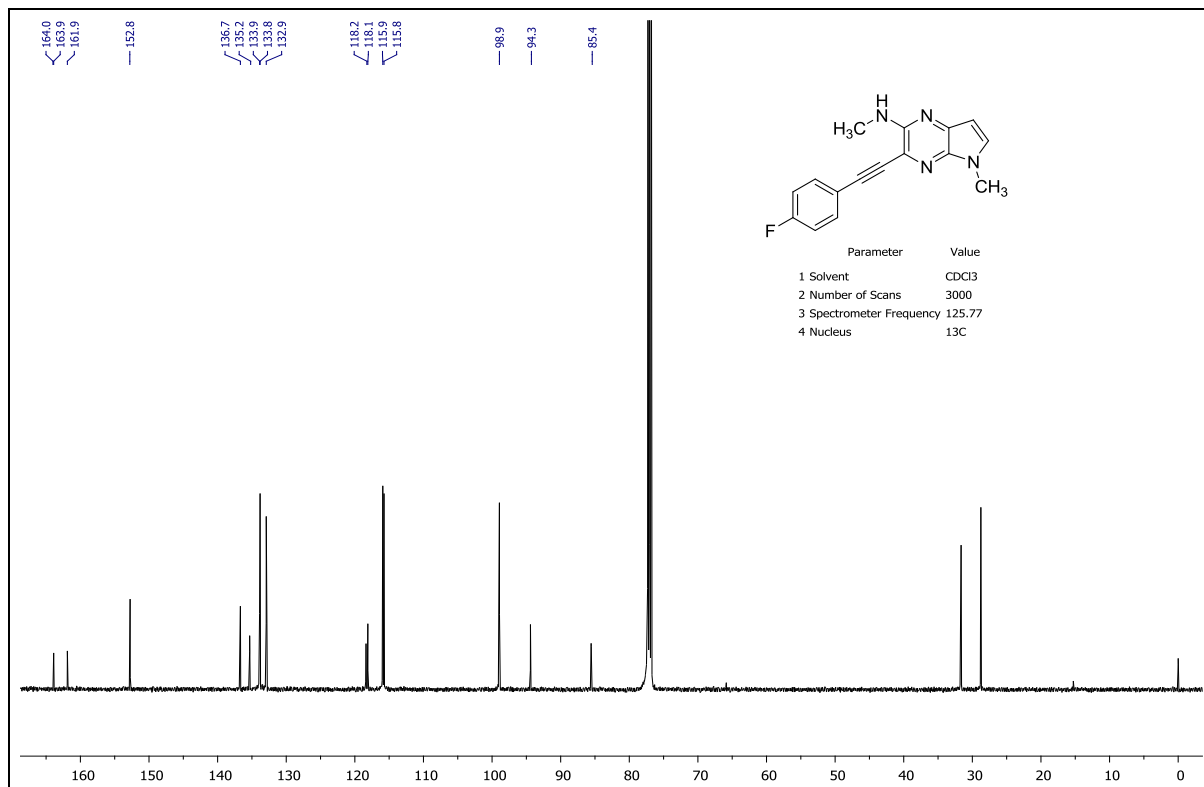

<sup>13</sup>C NMR – 10c

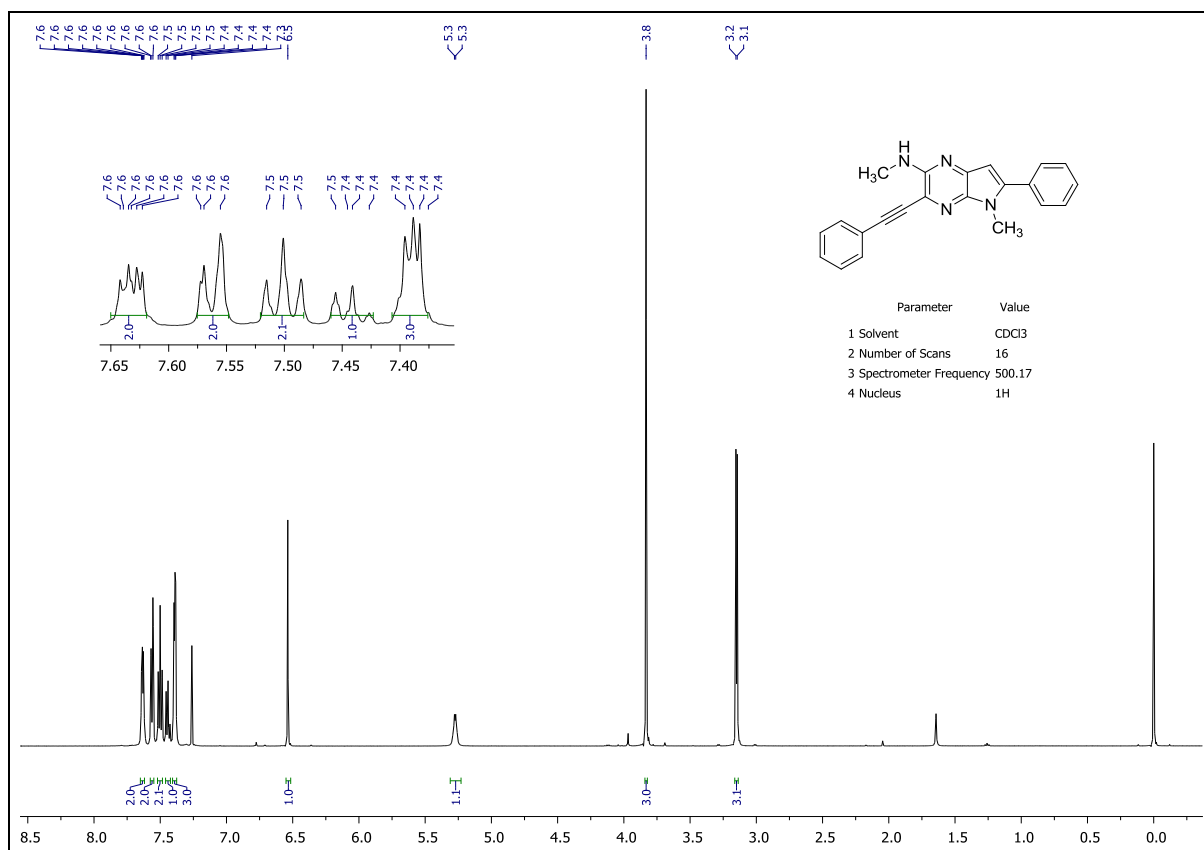

<sup>1</sup>H NMR – 10f

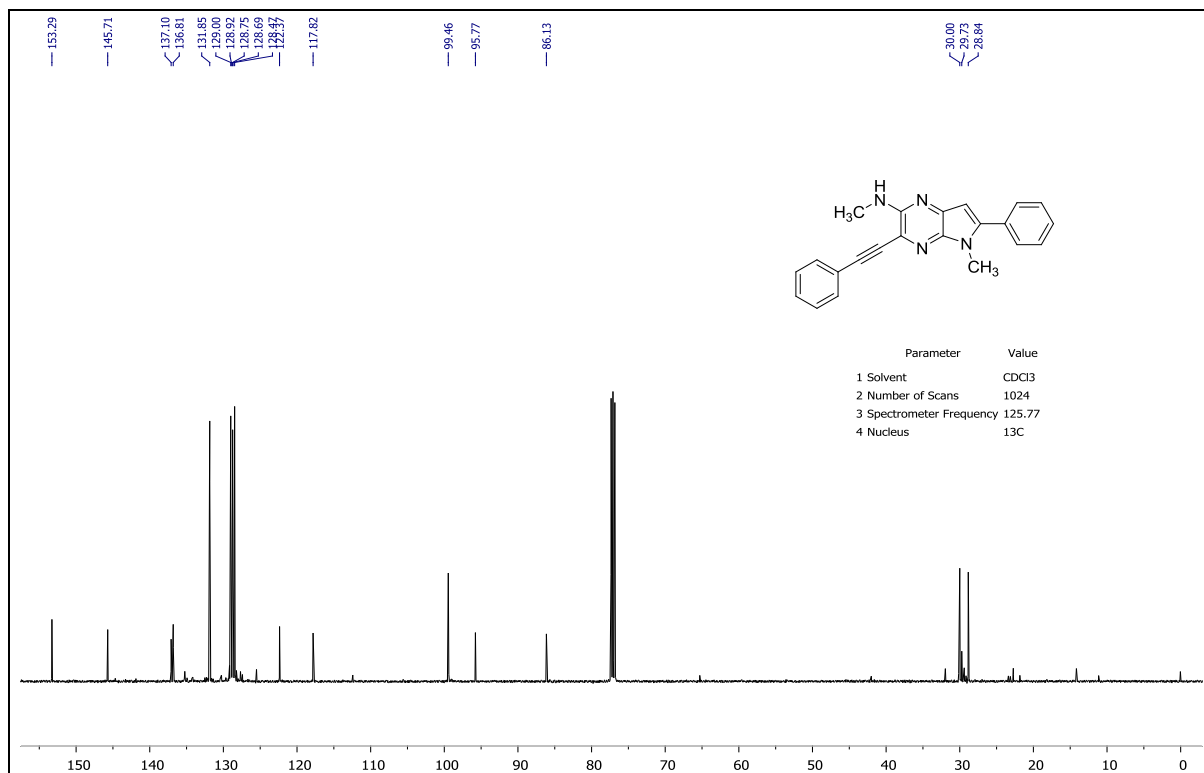

<sup>13</sup>C NMR – 10f

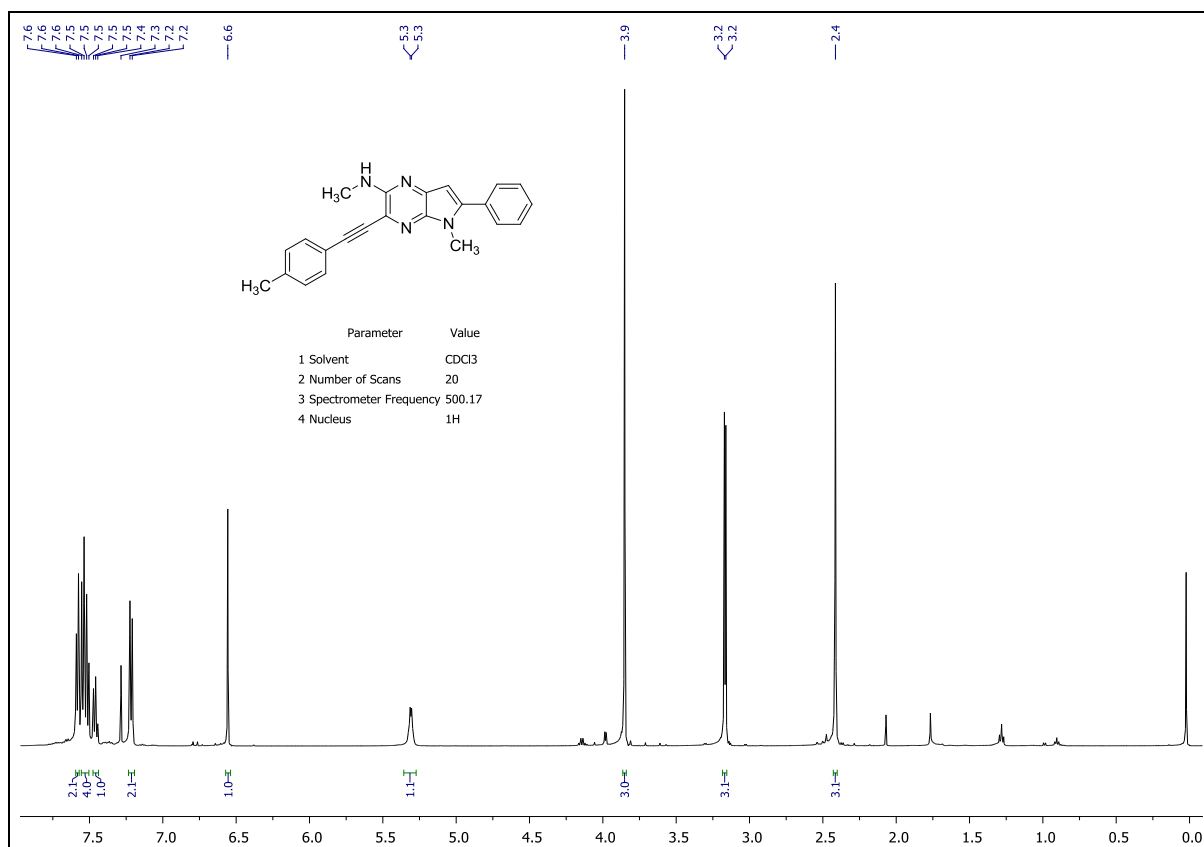

<sup>1</sup>H NMR – 10h

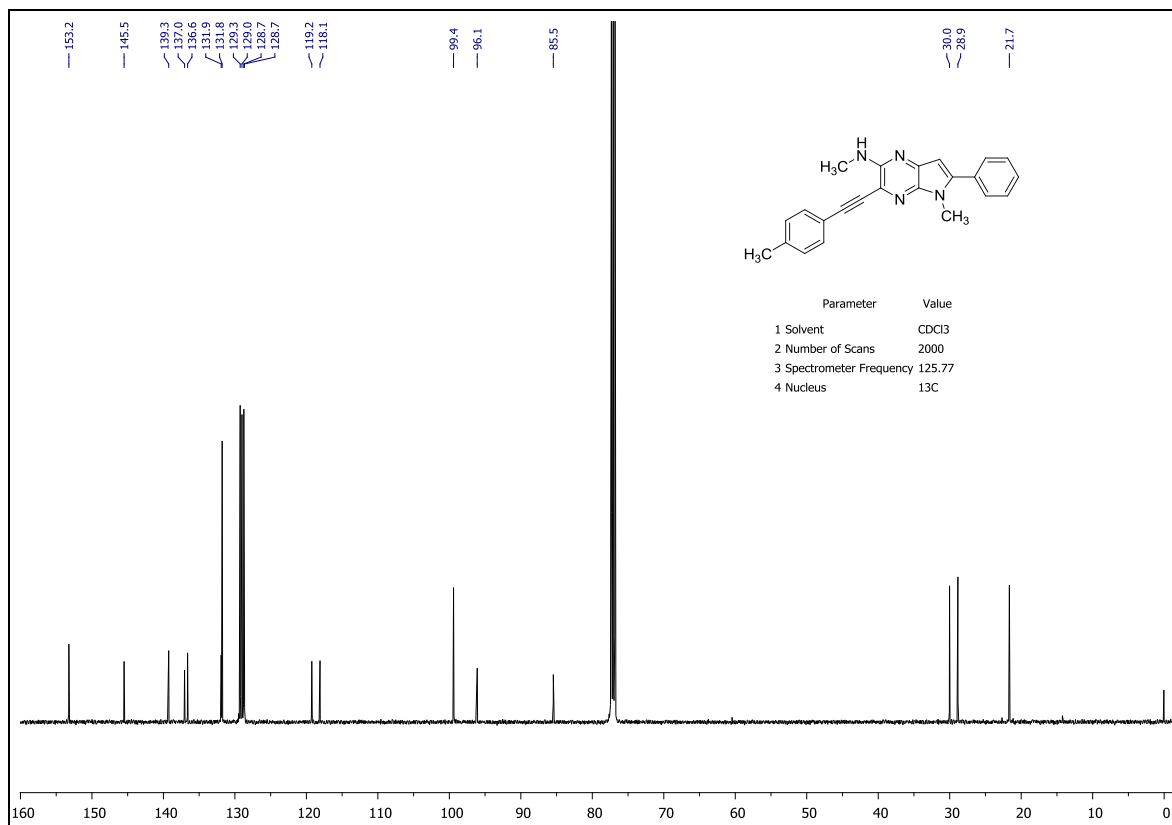

<sup>13</sup>C NMR – 10h

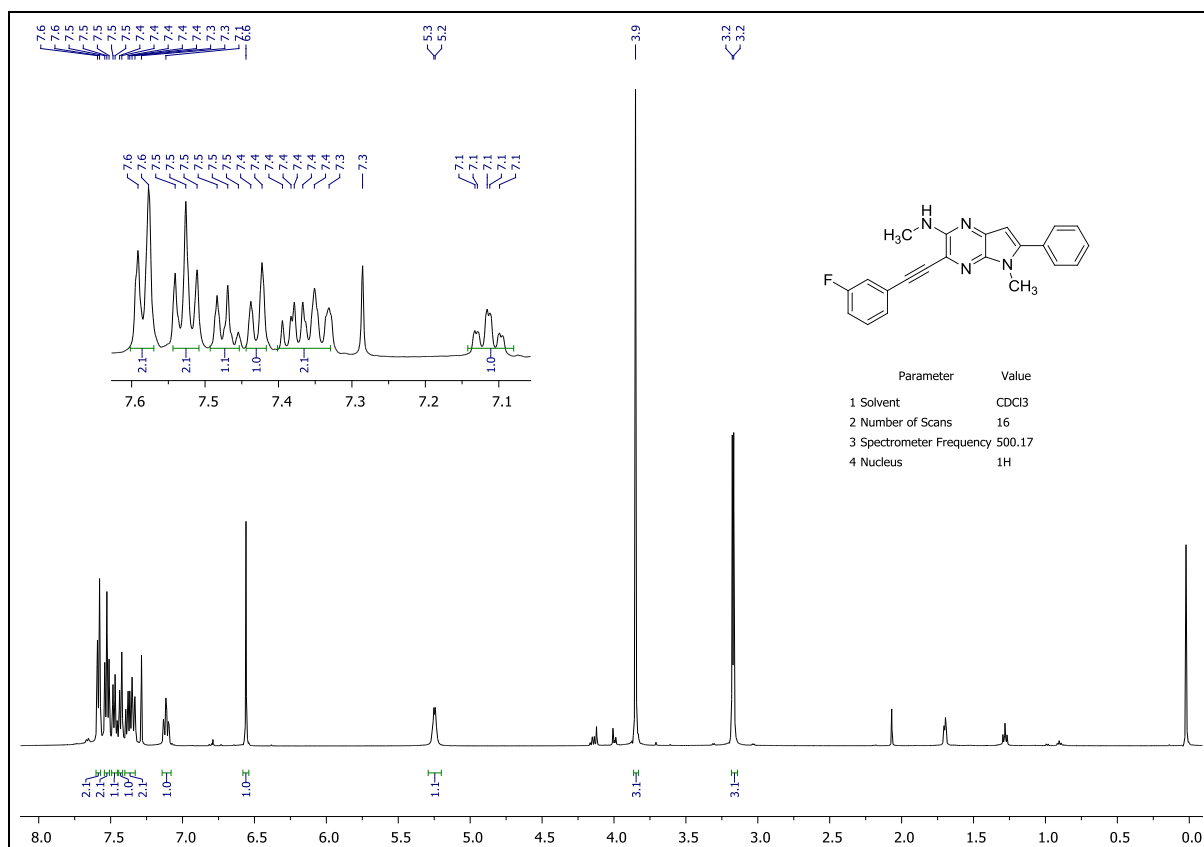

**<sup>1</sup>H NMR – 10j**

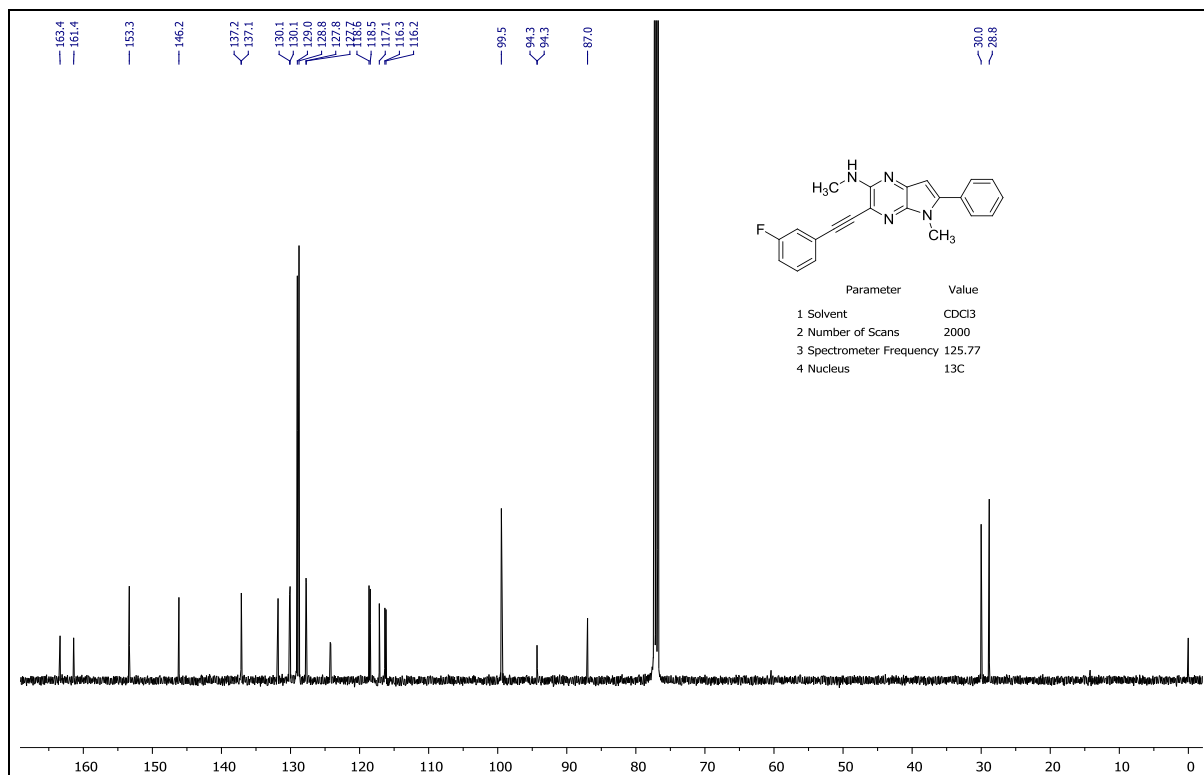

**<sup>13</sup>C NMR – 10j**

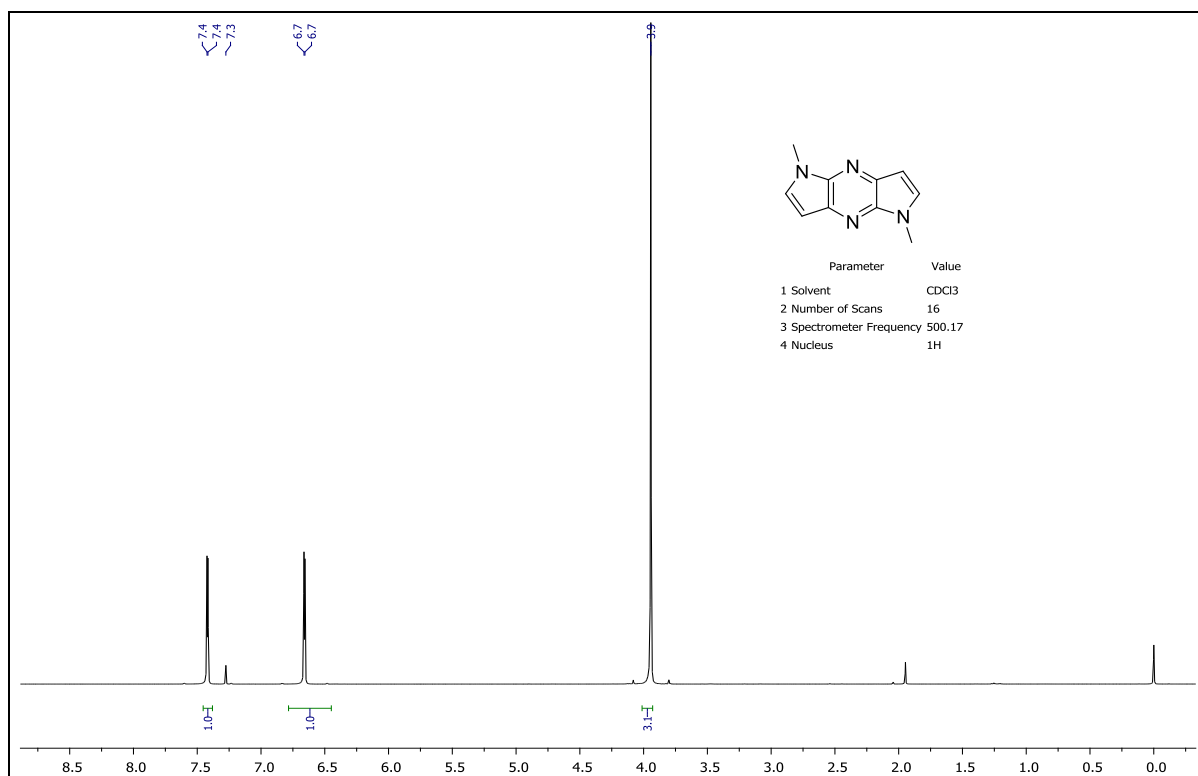

**$^1\text{H}$  NMR – 11a**

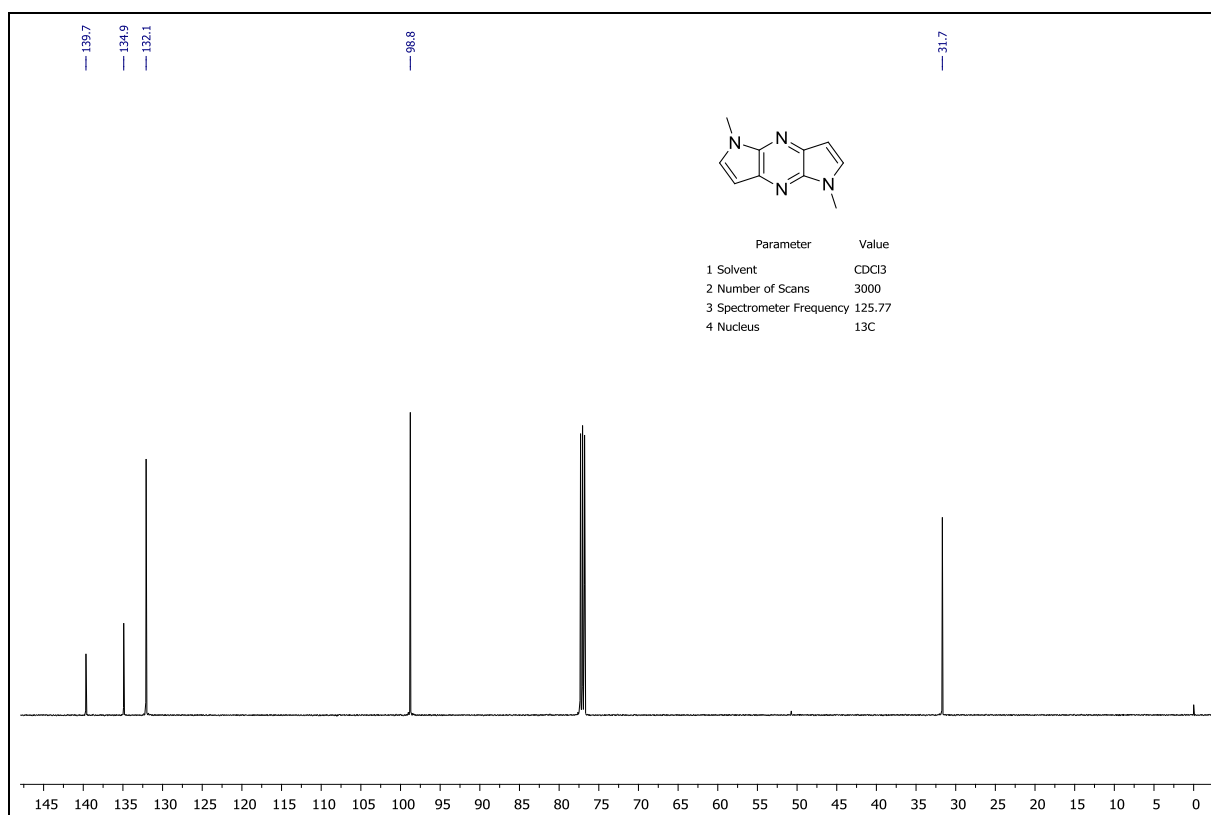

**$^{13}\text{C}$  NMR – 11a**

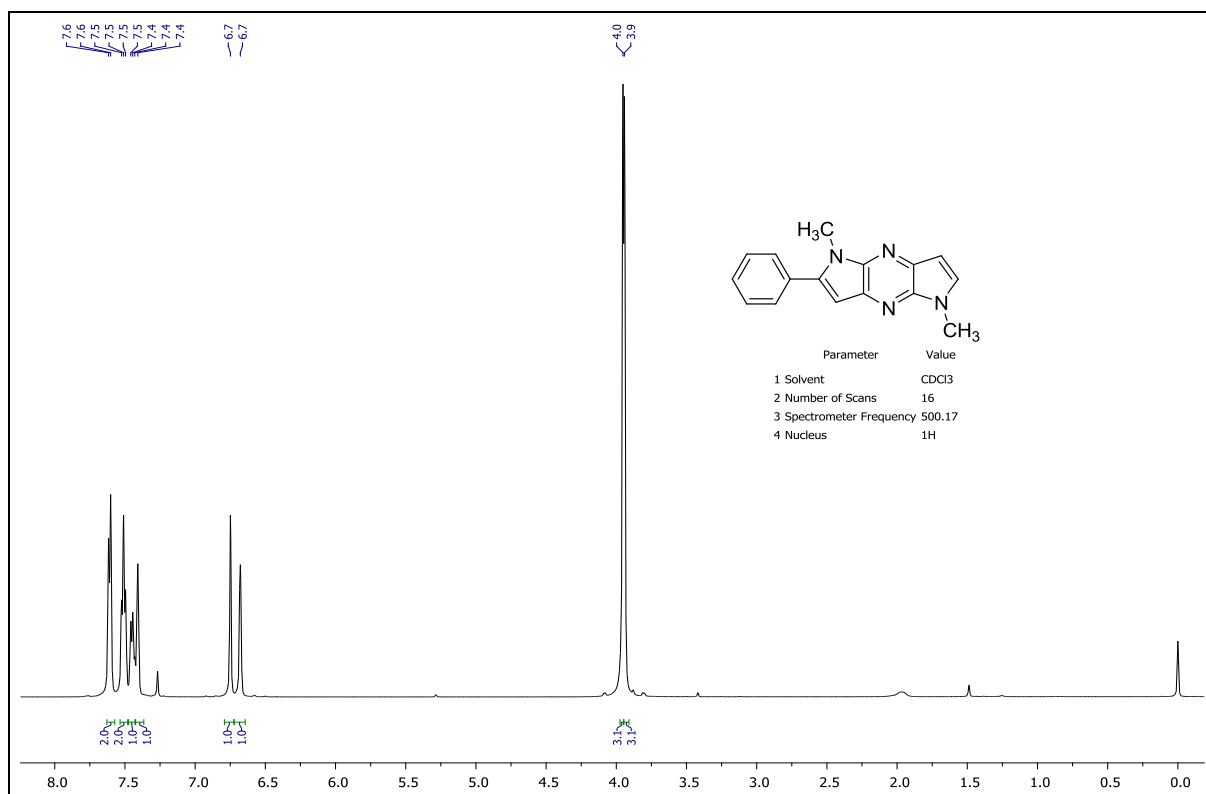

**<sup>1</sup>H NMR – 11b**

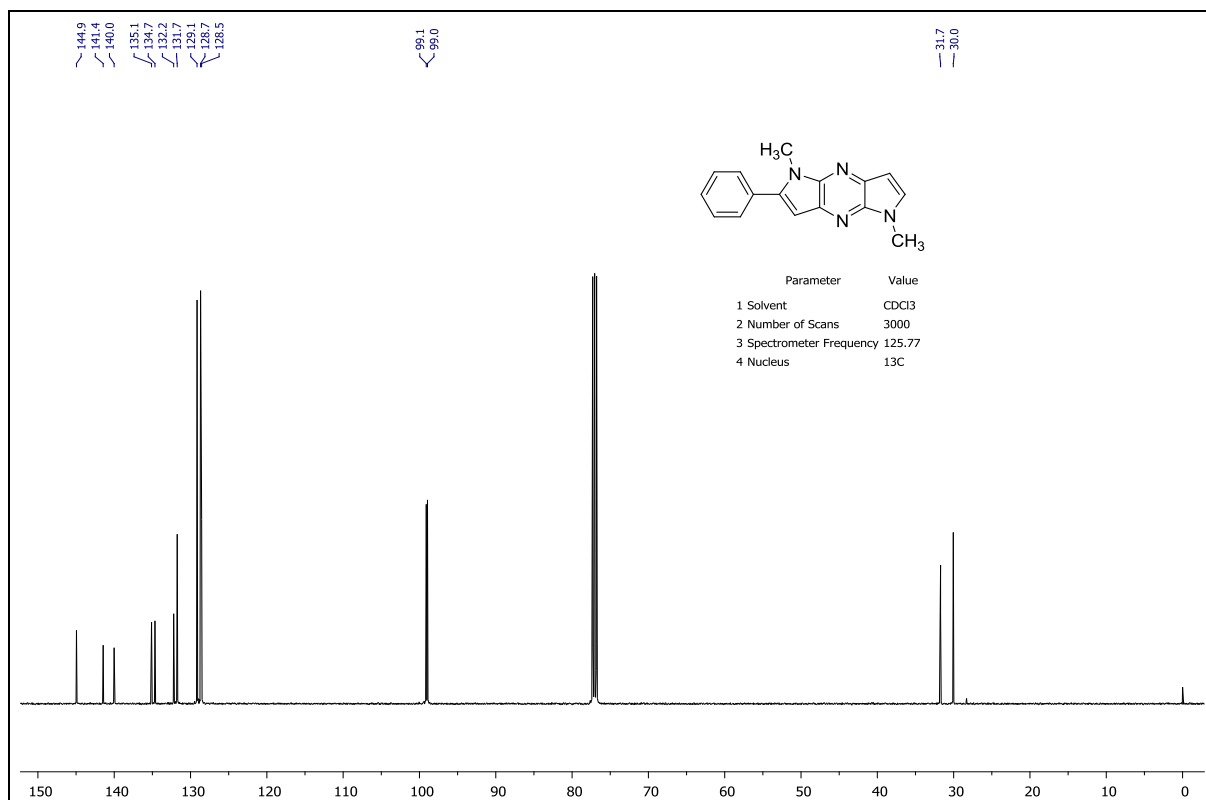

**<sup>13</sup>C NMR – 11b**

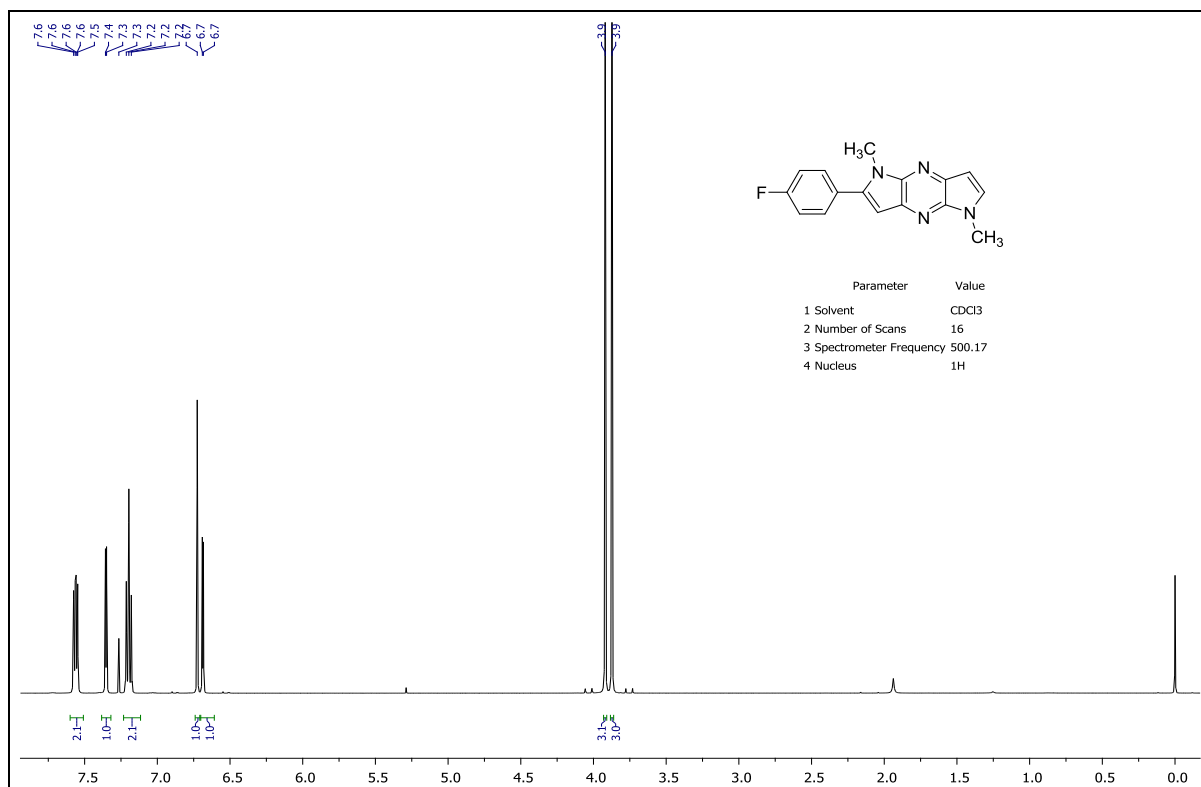

**<sup>1</sup>H NMR – 11c**

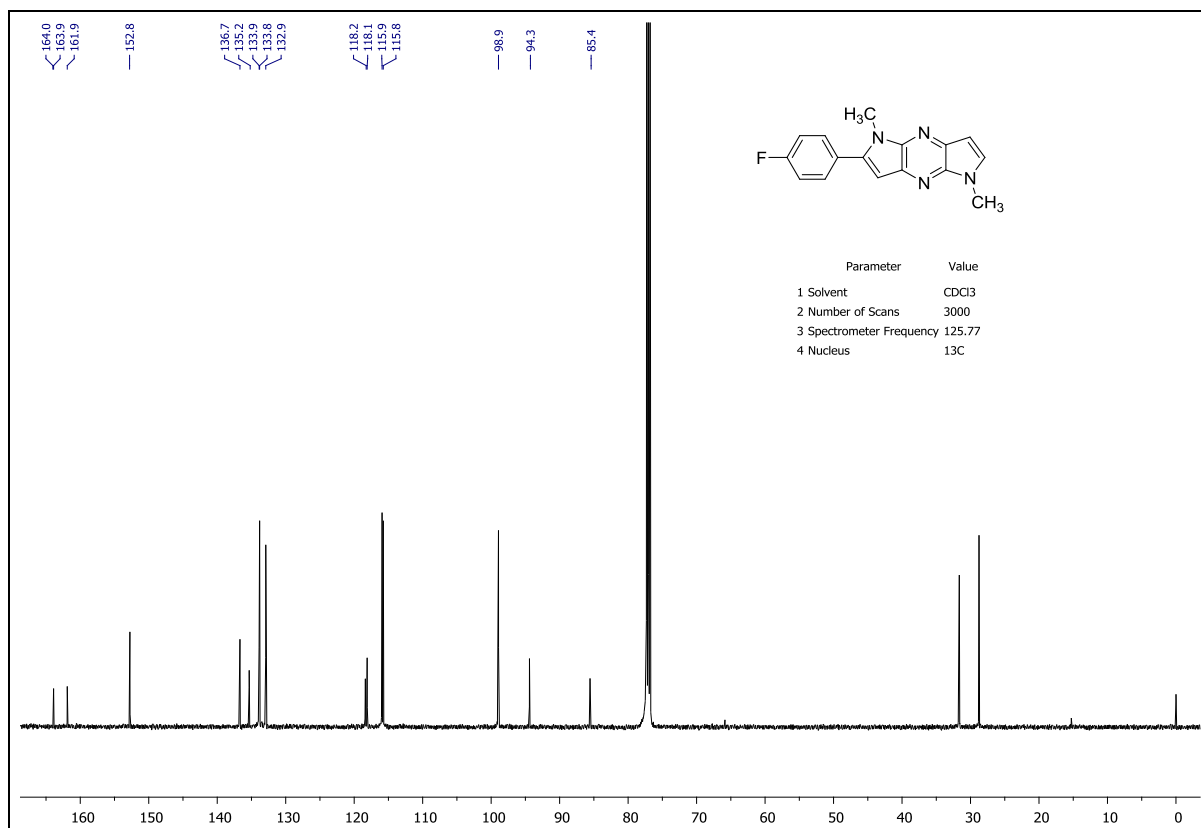

**<sup>13</sup>C NMR – 11c**

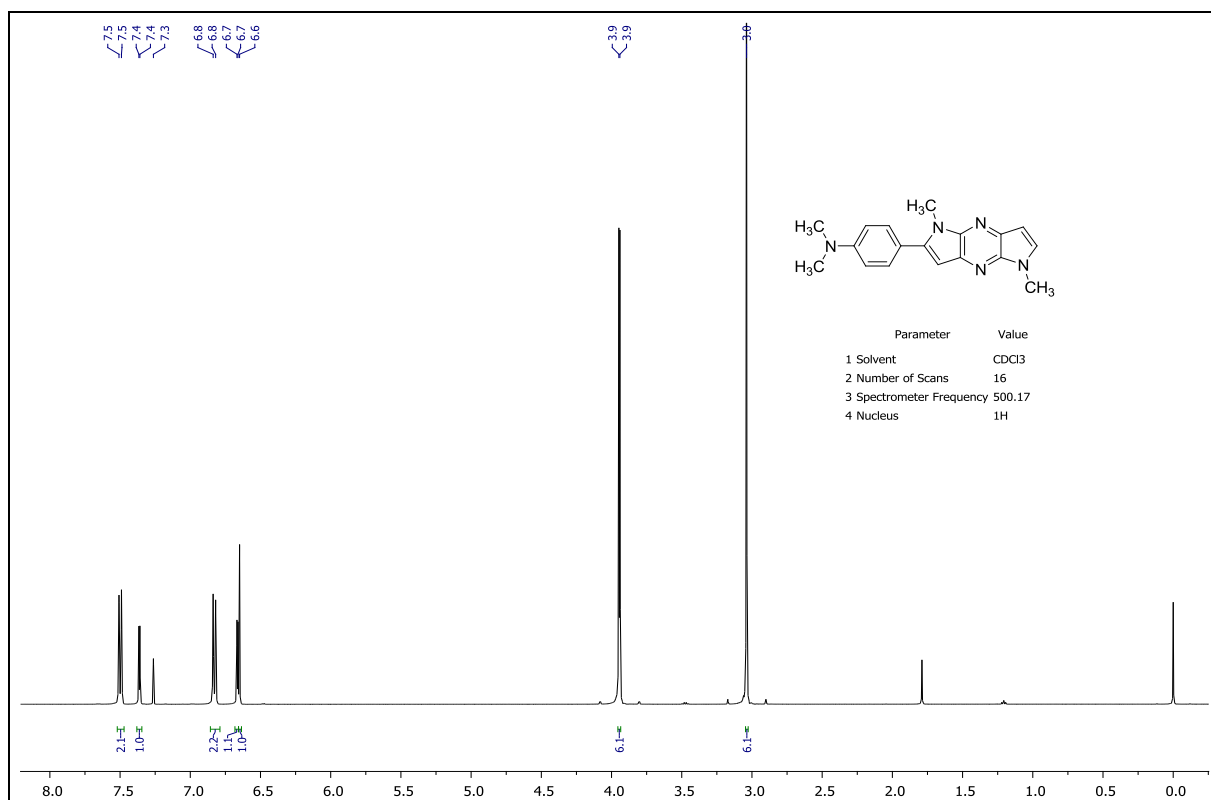

<sup>1</sup>H NMR – 11d

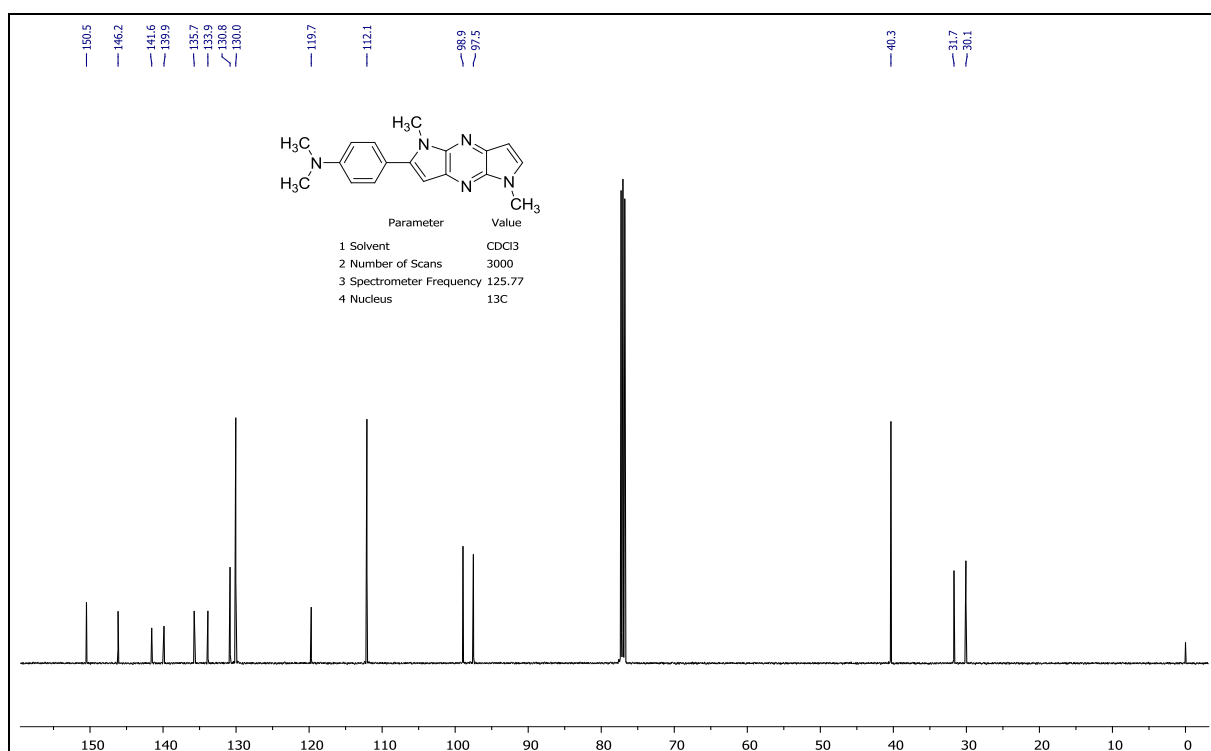

<sup>13</sup>C NMR – 11d



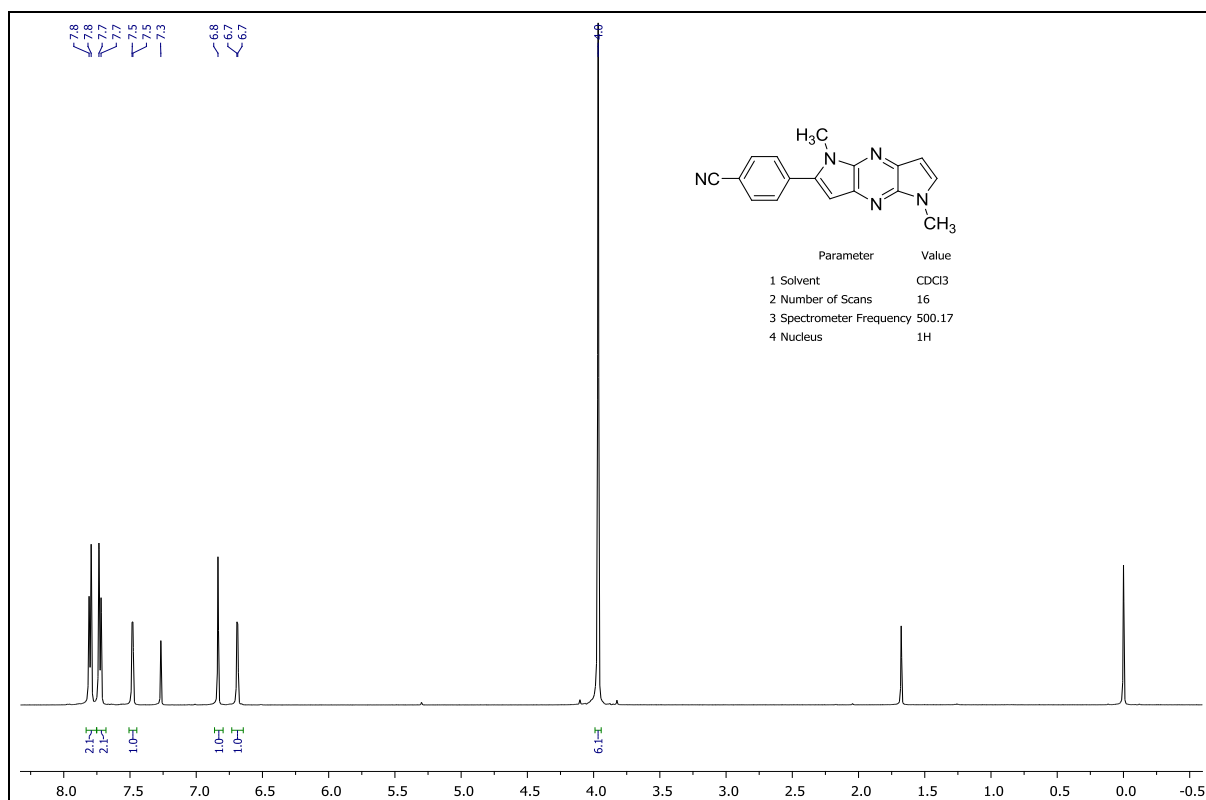

<sup>1</sup>H NMR – 11e

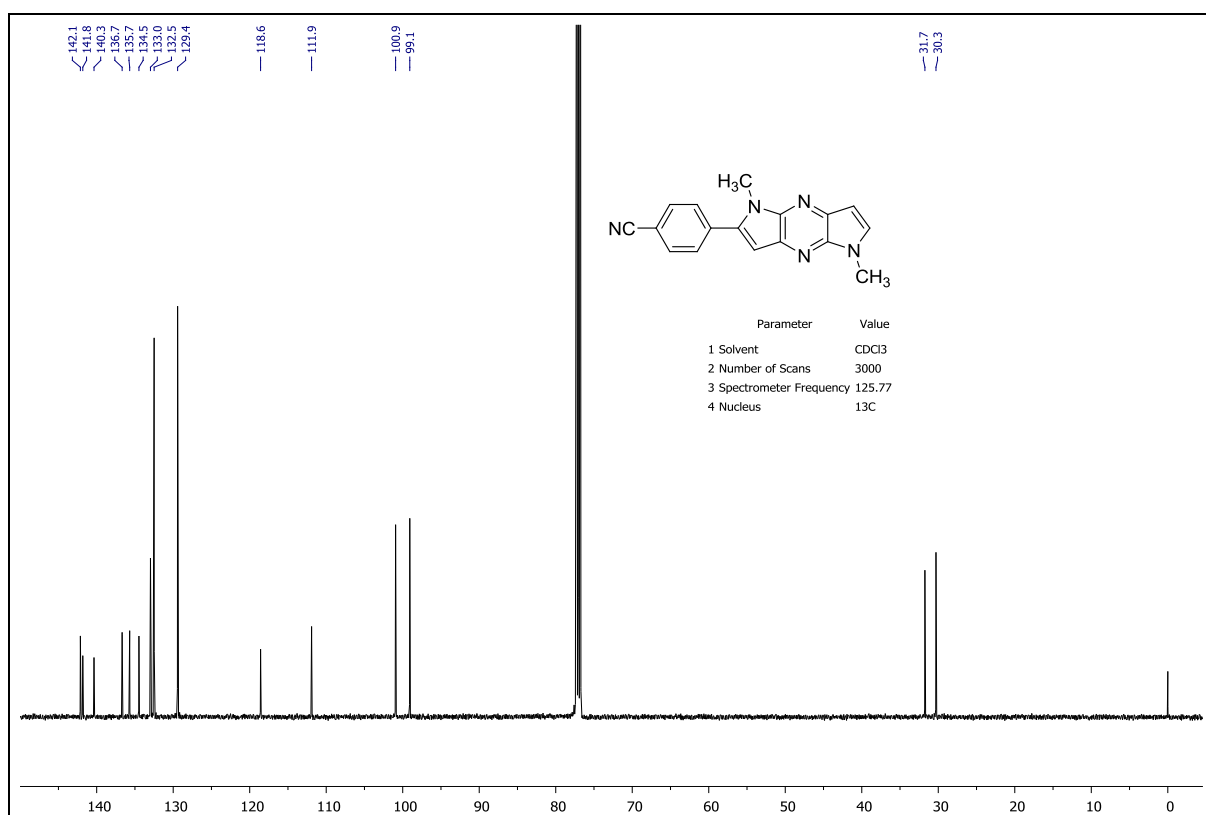

<sup>13</sup>C NMR – 11e

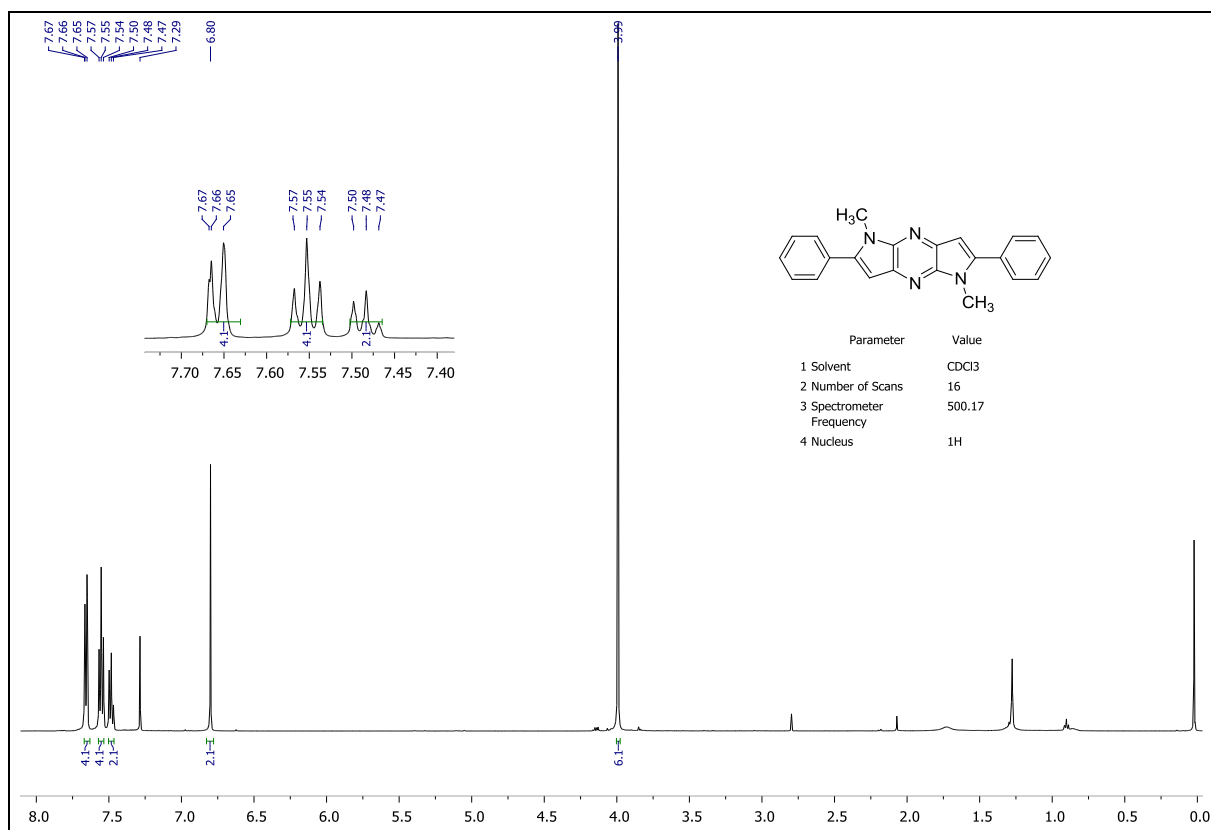

**<sup>1</sup>H NMR – 11f**

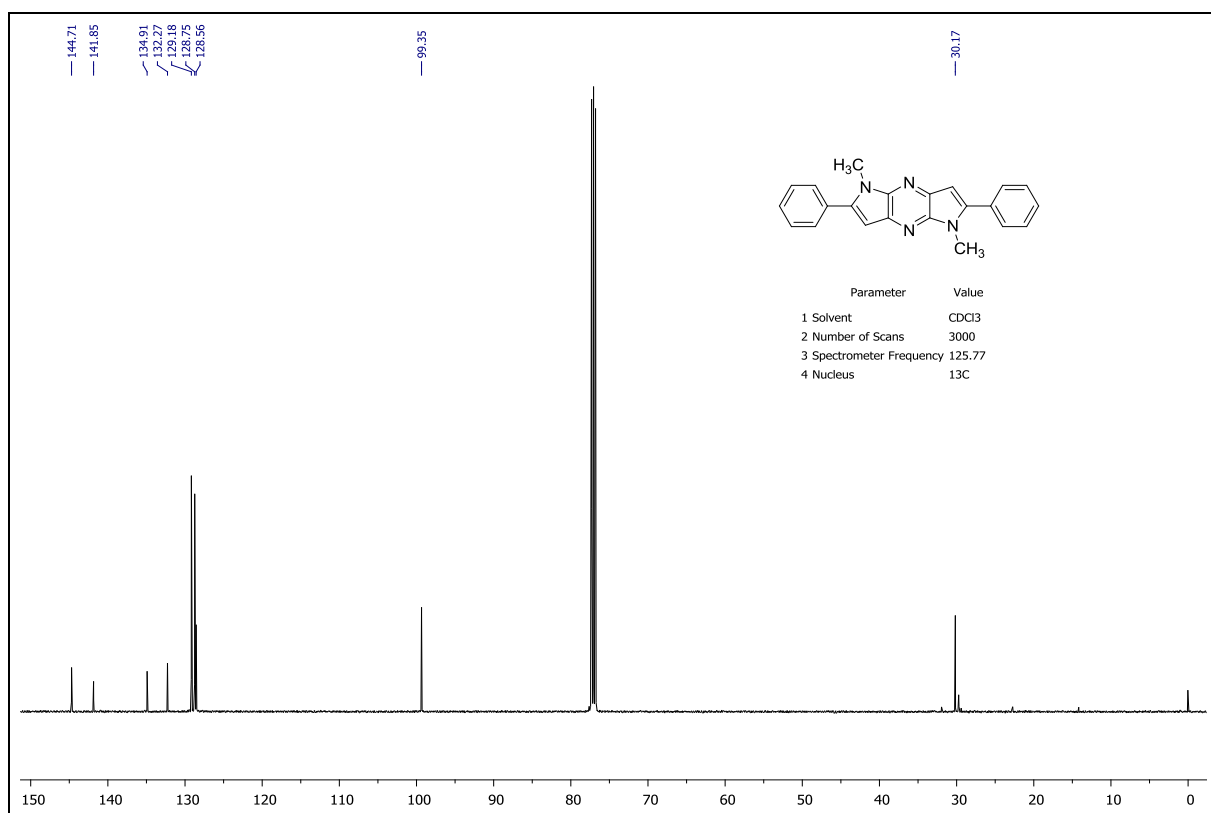

**<sup>13</sup>C NMR – 11f**

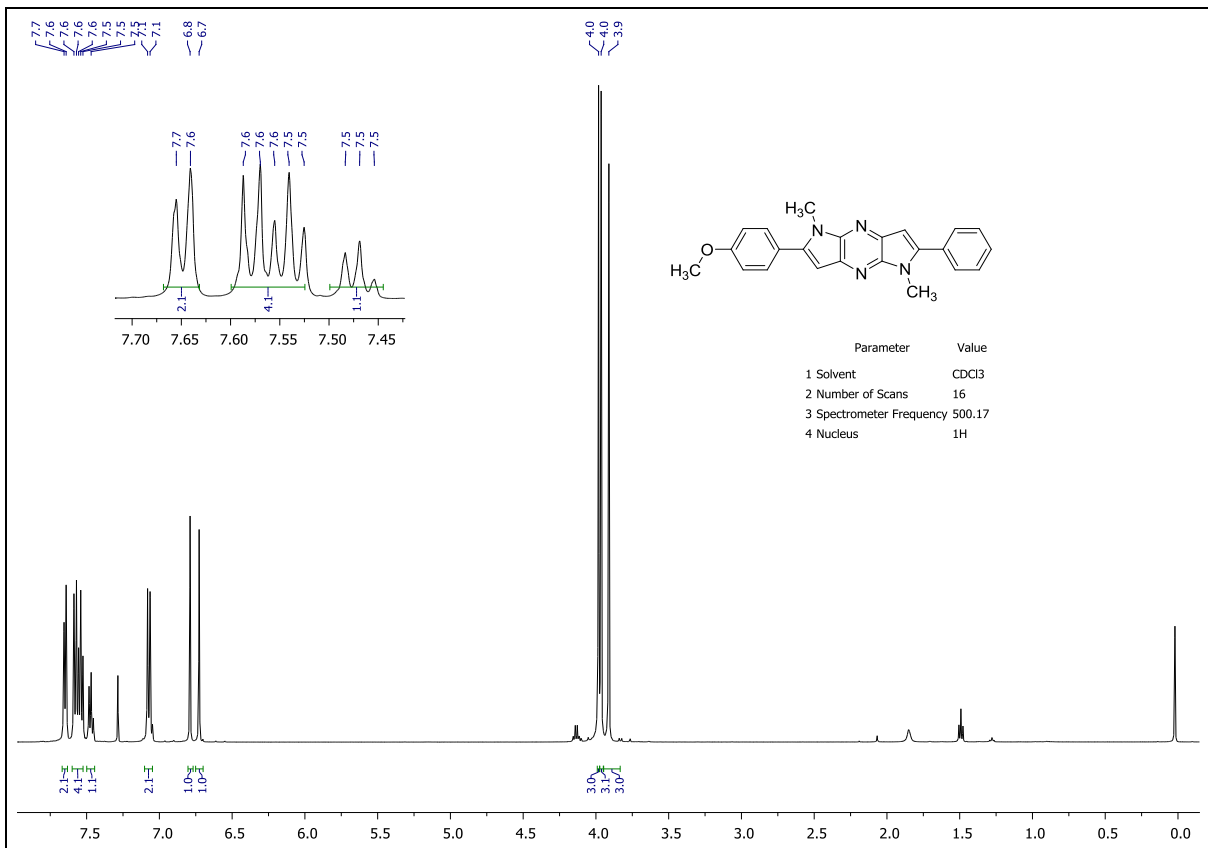

<sup>1</sup>H NMR – 11g

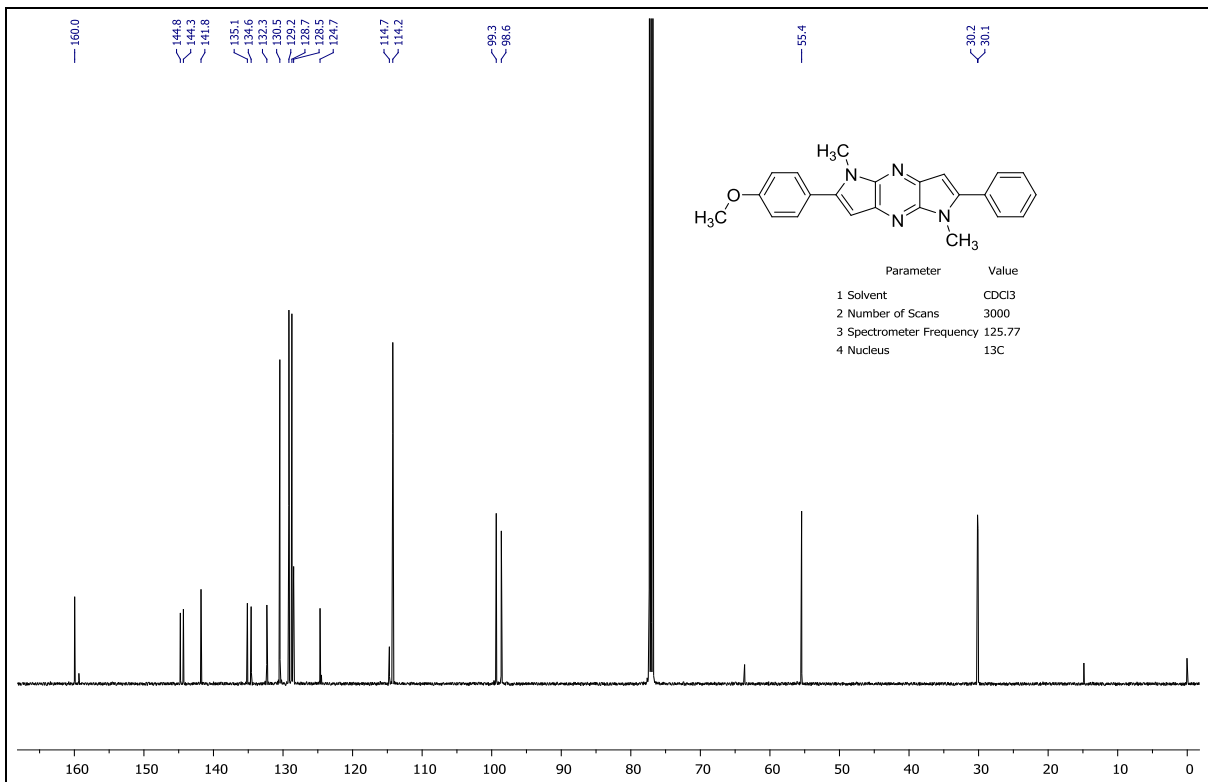

<sup>13</sup>C NMR – 11g

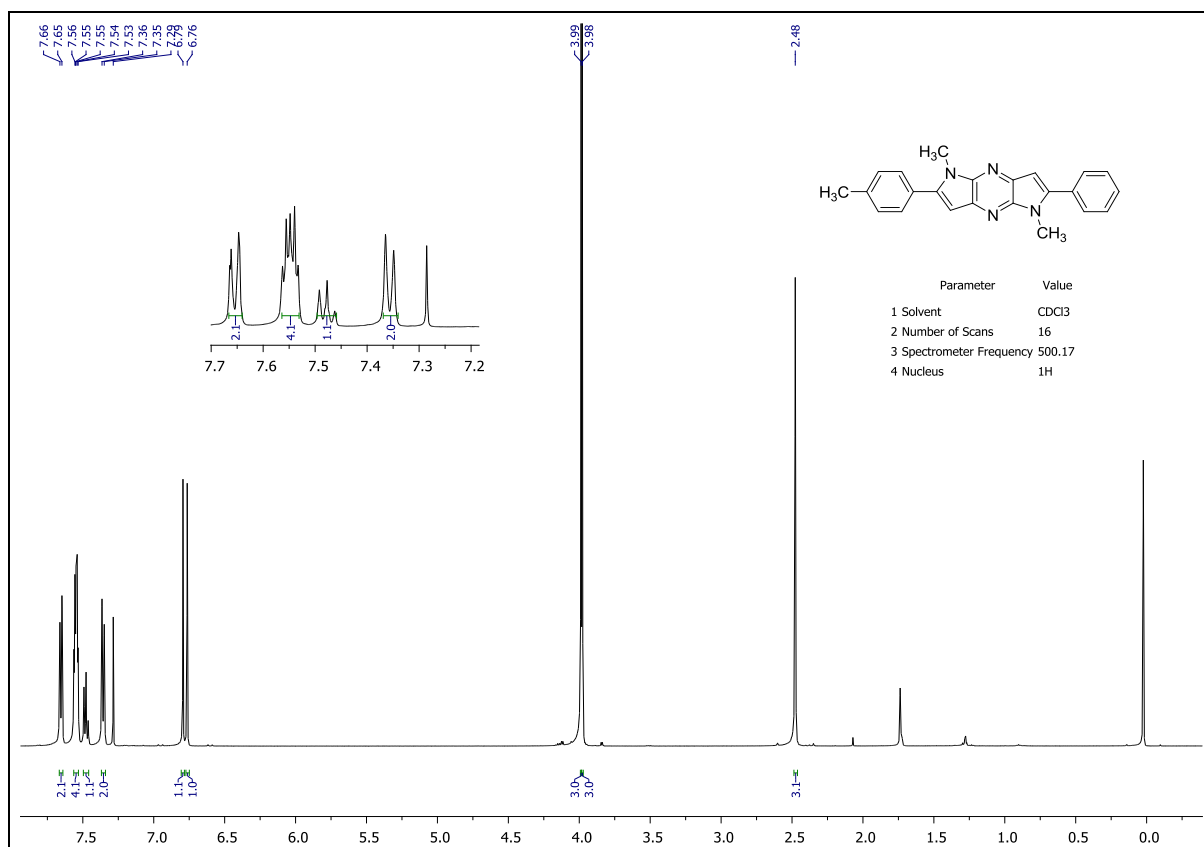

<sup>1</sup>H NMR – 11h

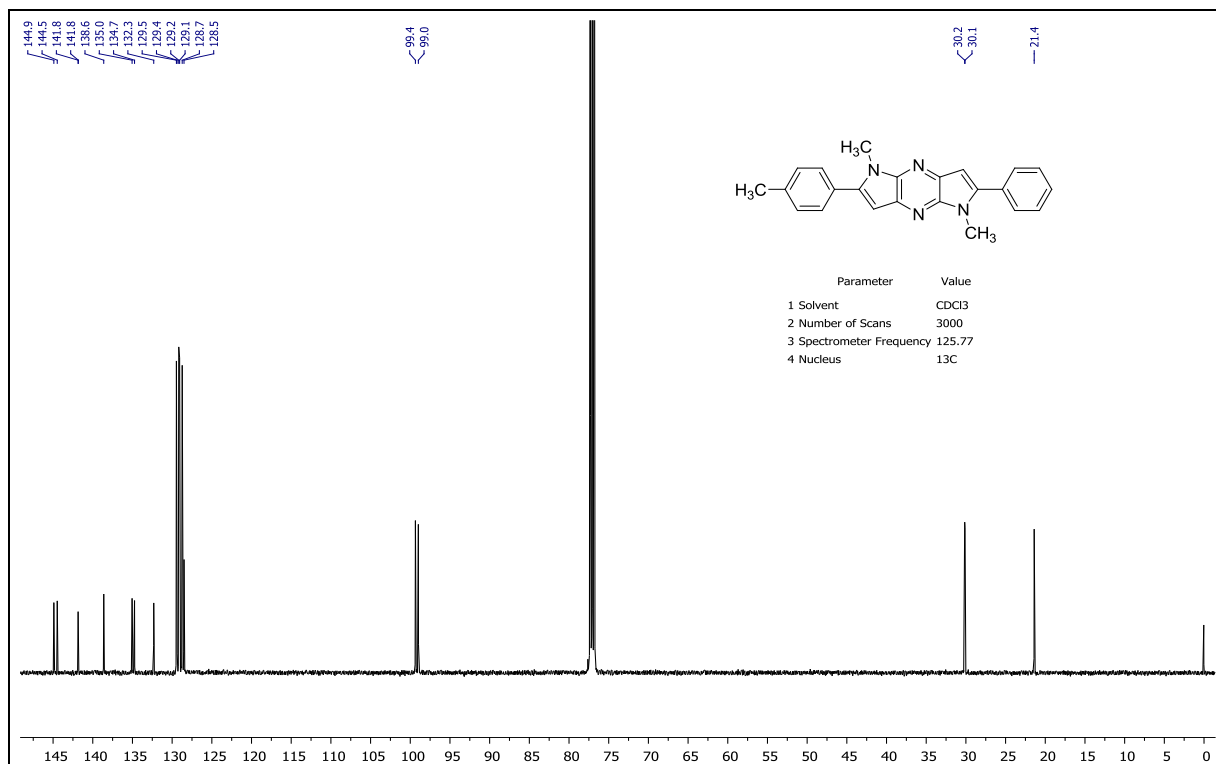

<sup>13</sup>C NMR – 11h

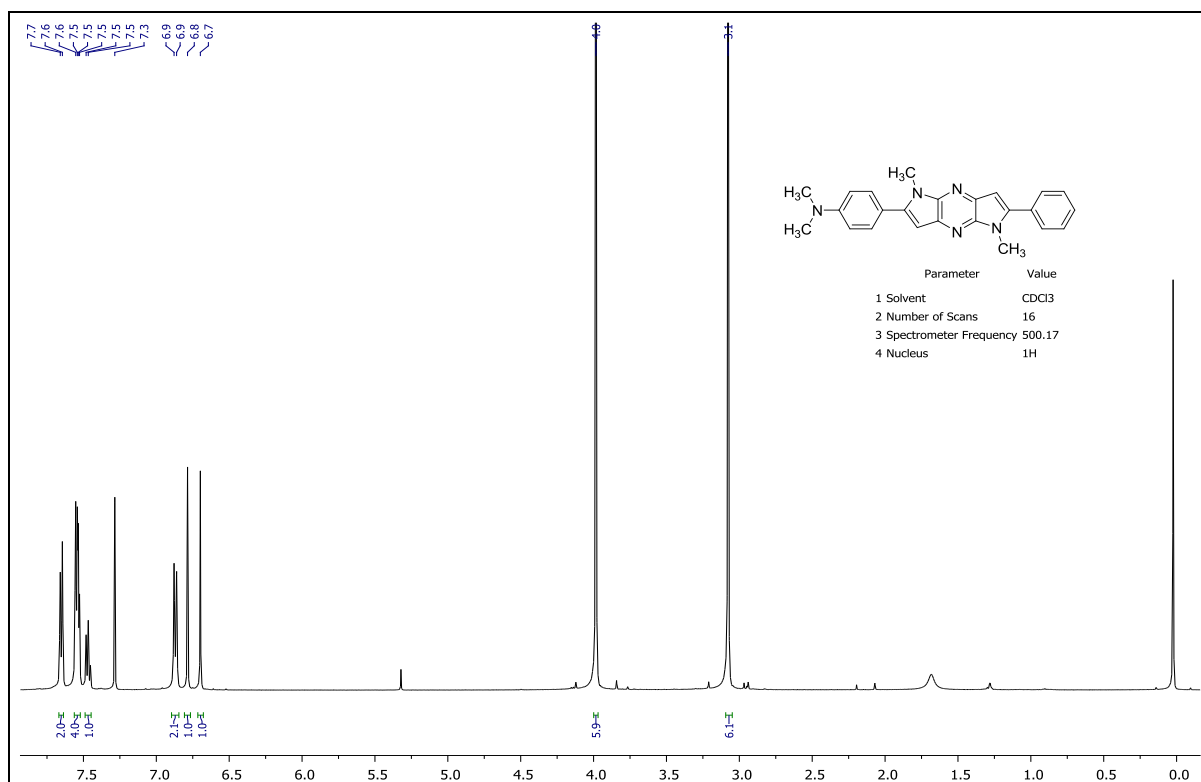

<sup>1</sup>H NMR – 11i

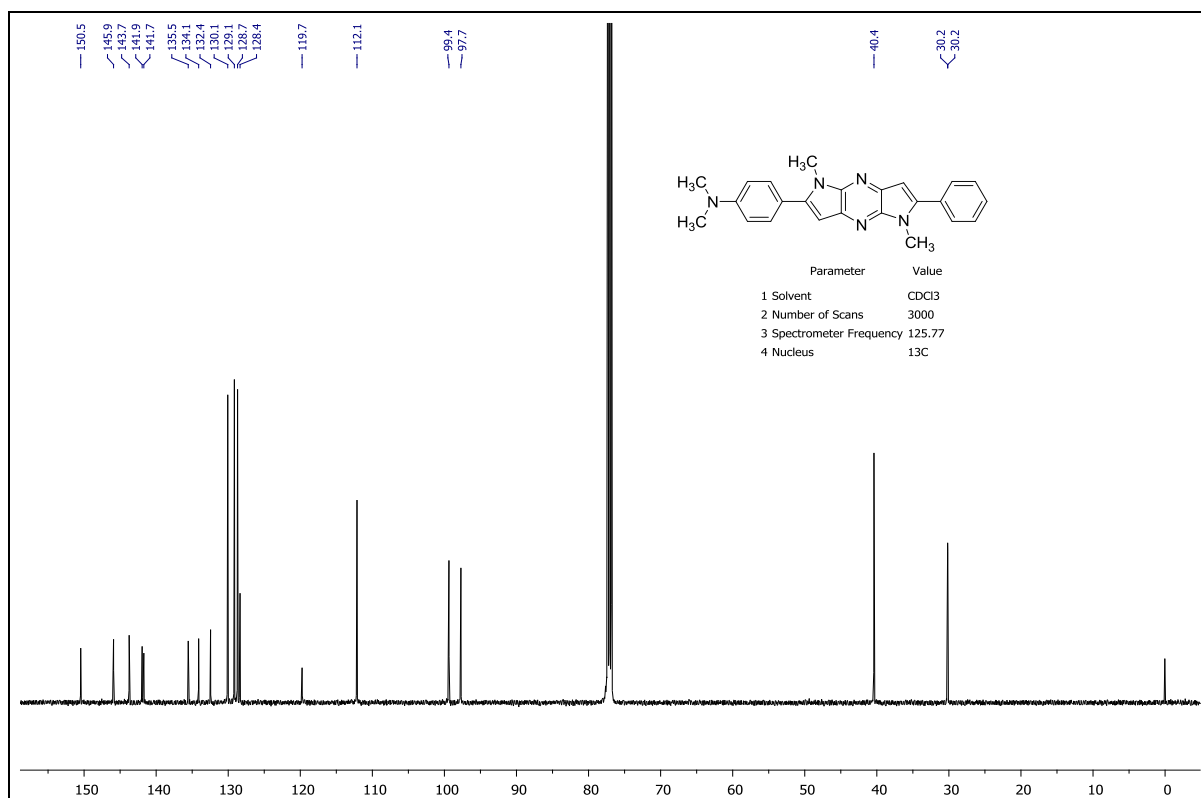

<sup>13</sup>C NMR – 11i

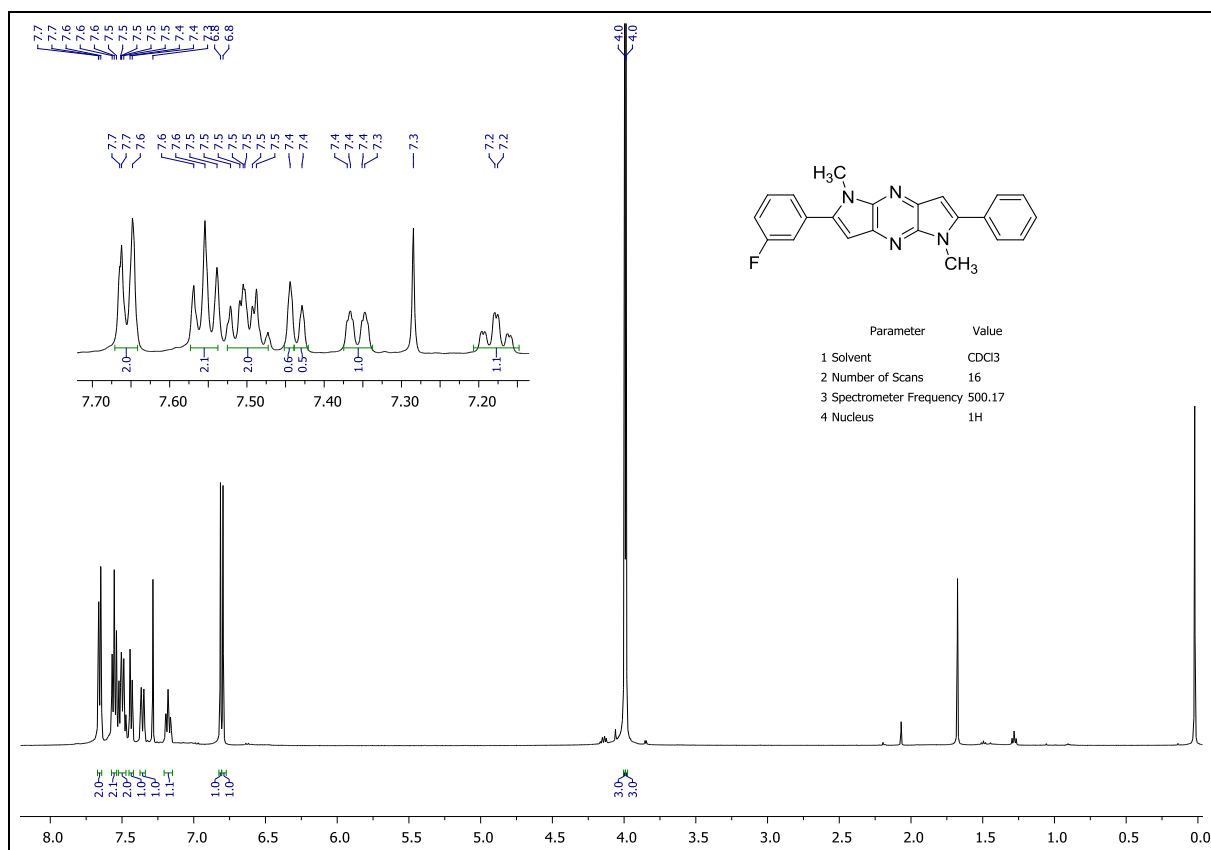

<sup>1</sup>H NMR – 11j

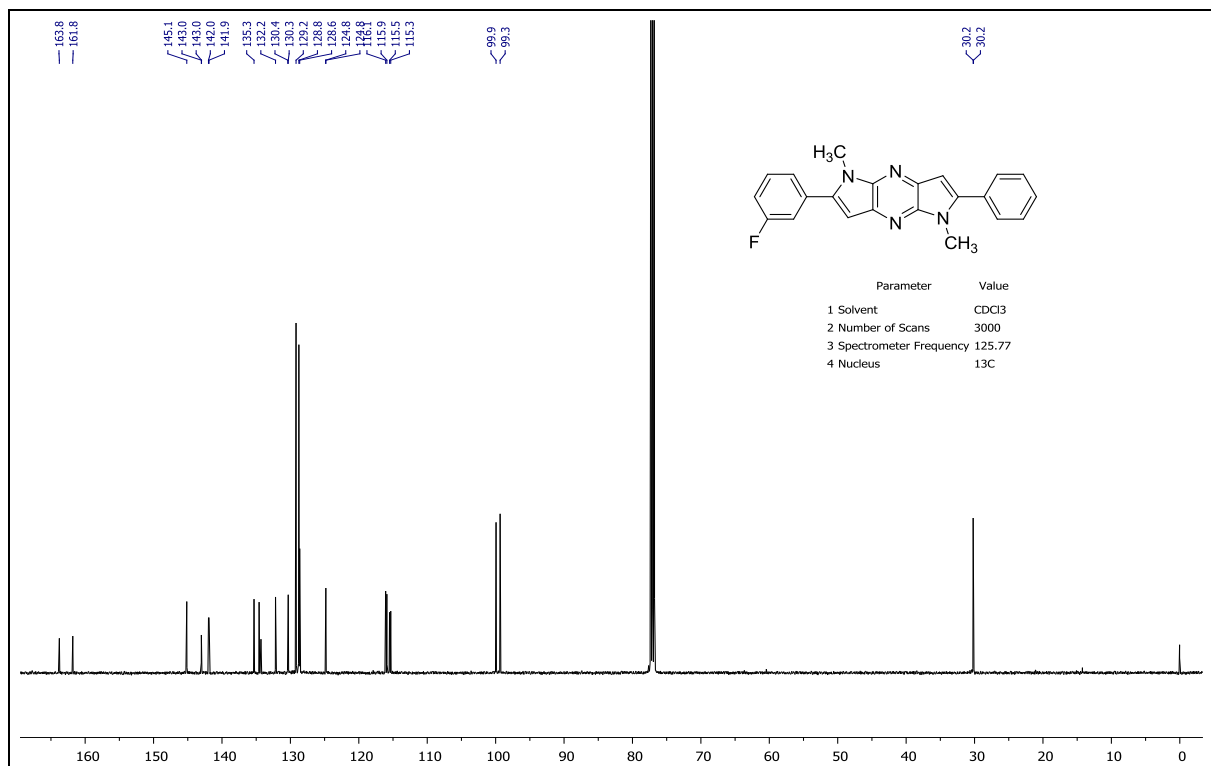

<sup>13</sup>C NMR – 11j

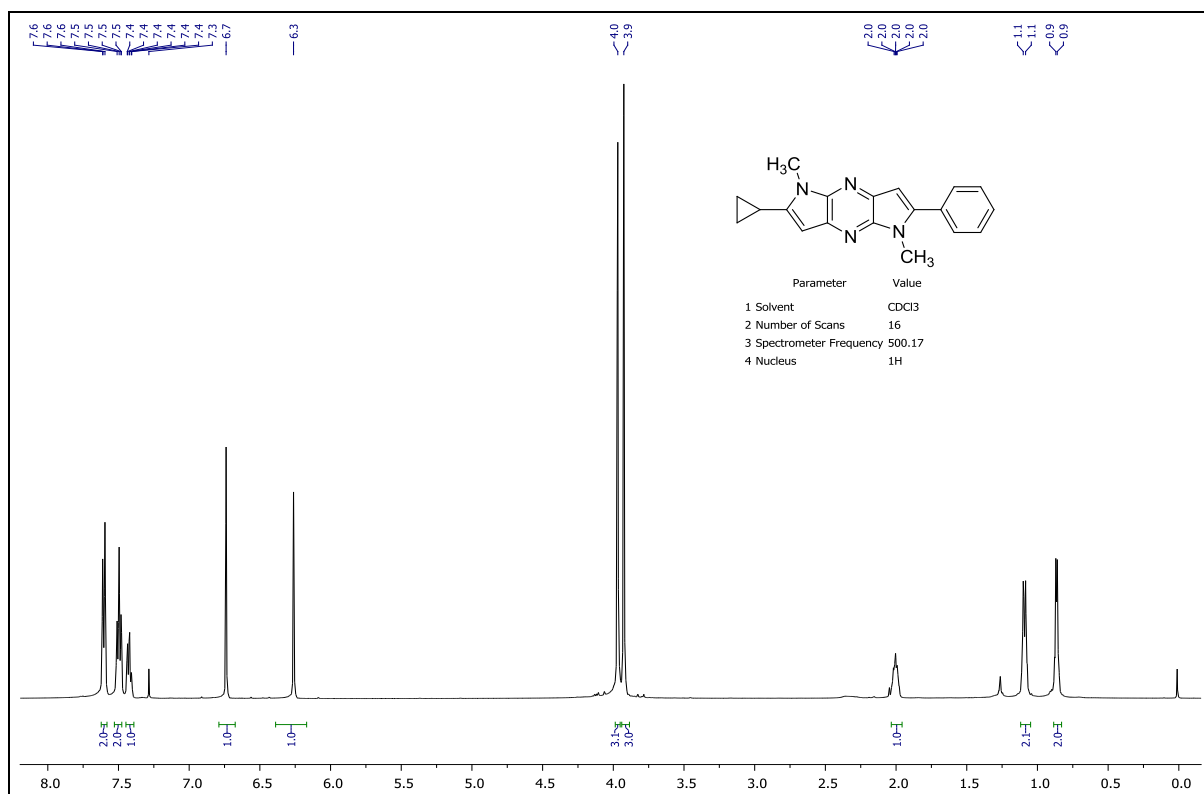

<sup>1</sup>H NMR – 11k

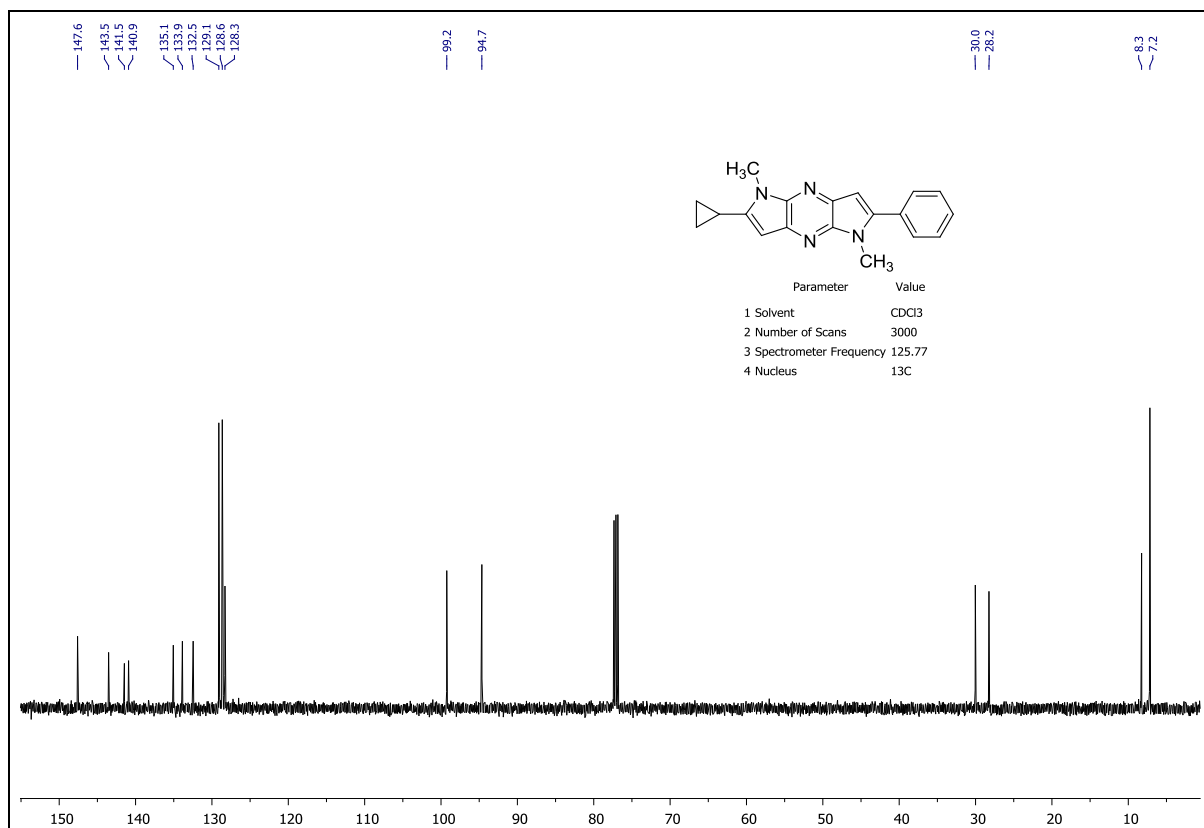

<sup>13</sup>C NMR – 11k

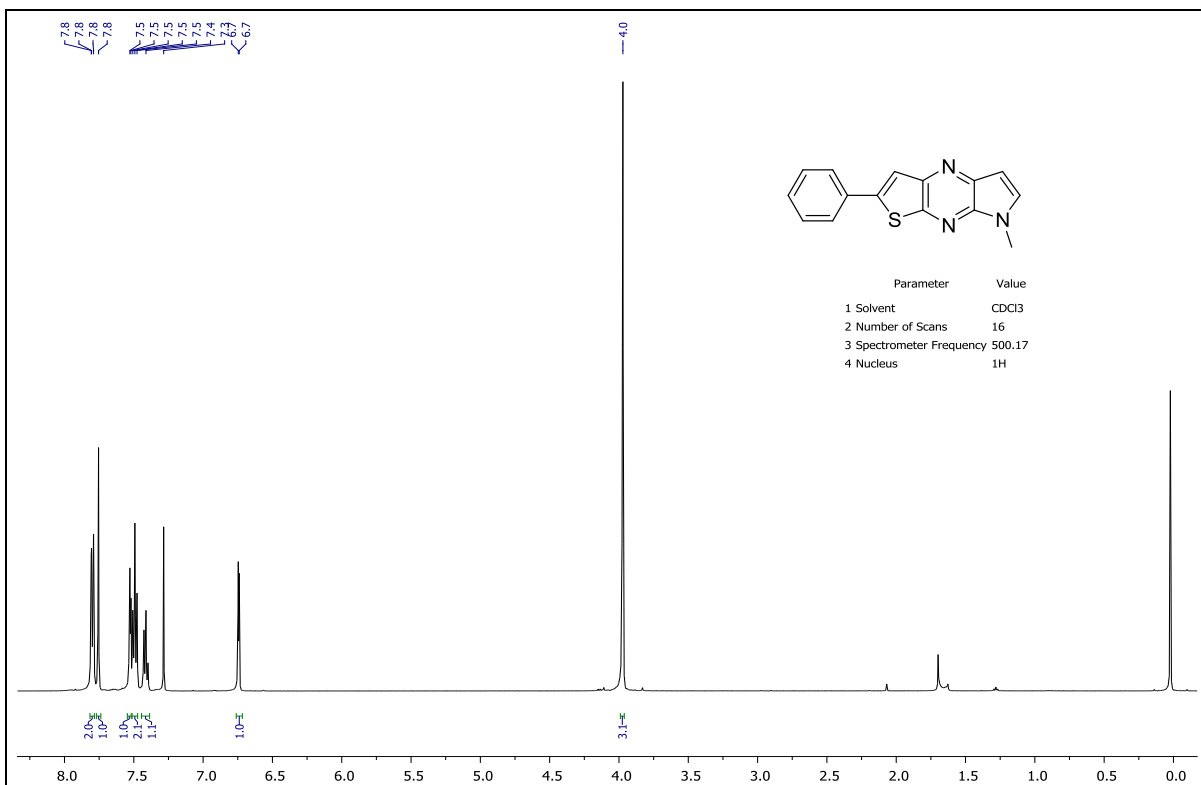

<sup>1</sup>H NMR – 13a

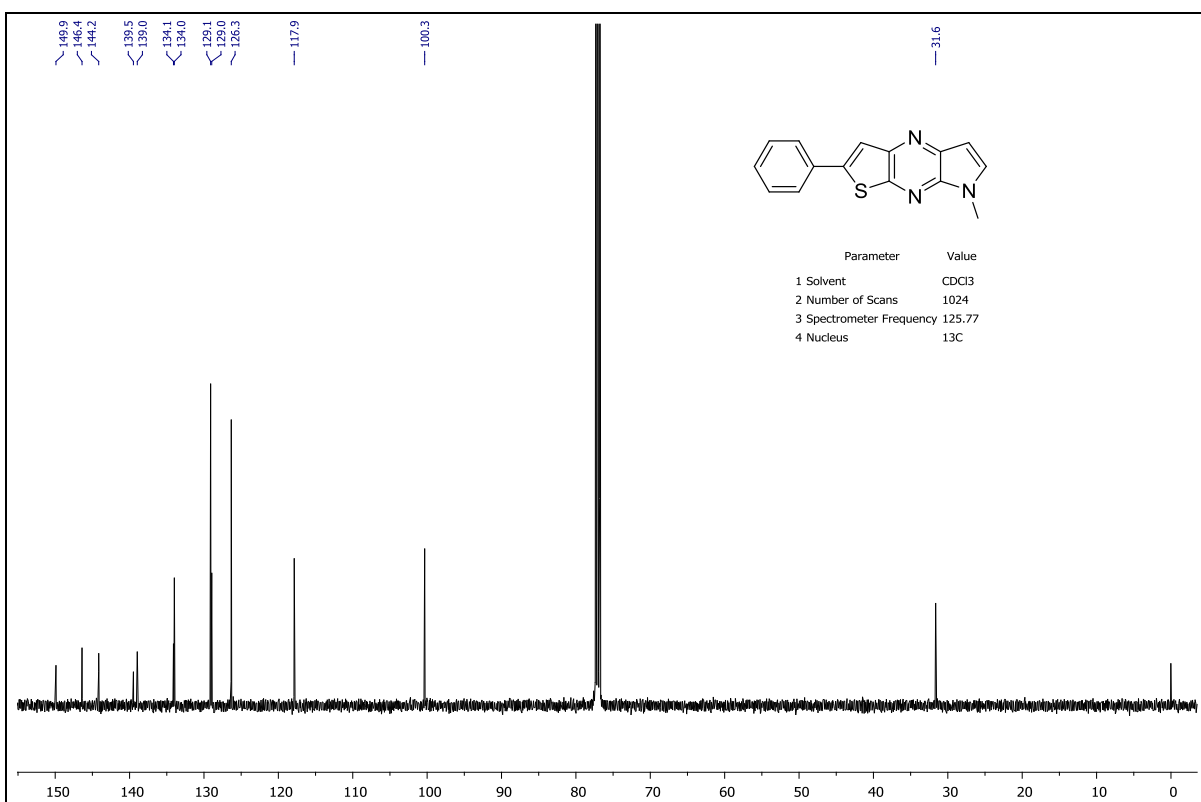

<sup>13</sup>C NMR – 13a



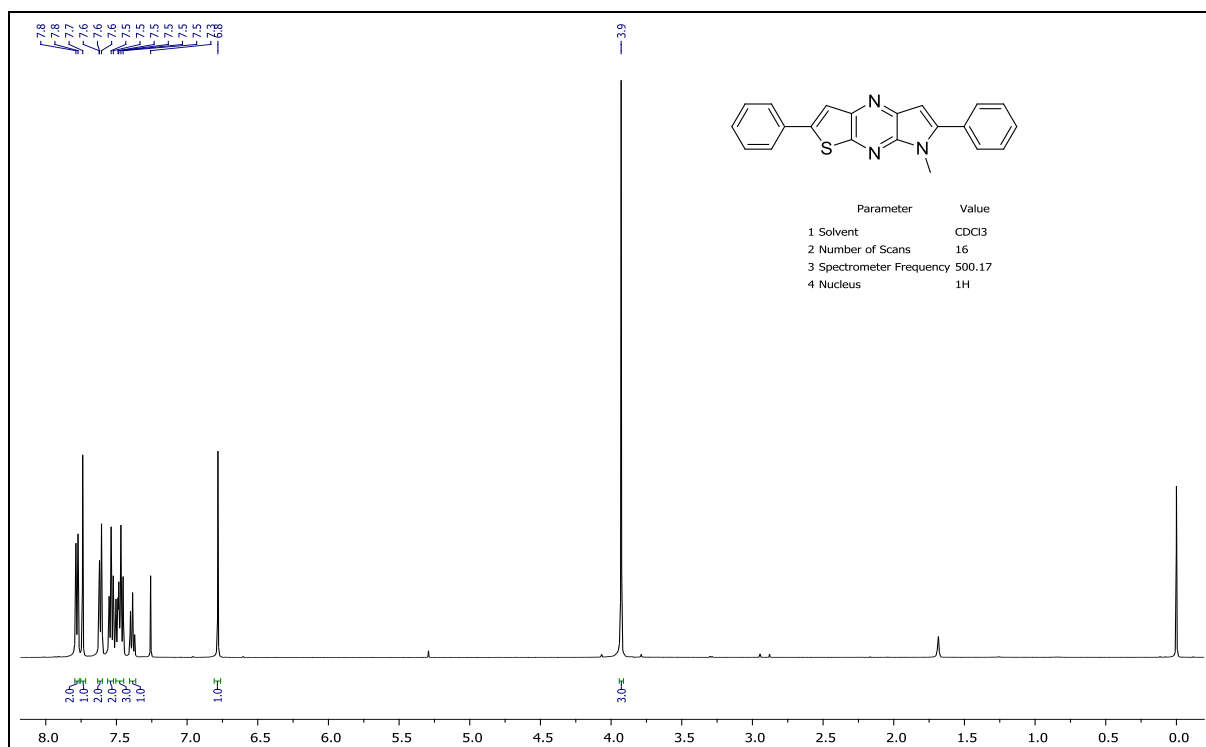

<sup>1</sup>H NMR – 13b

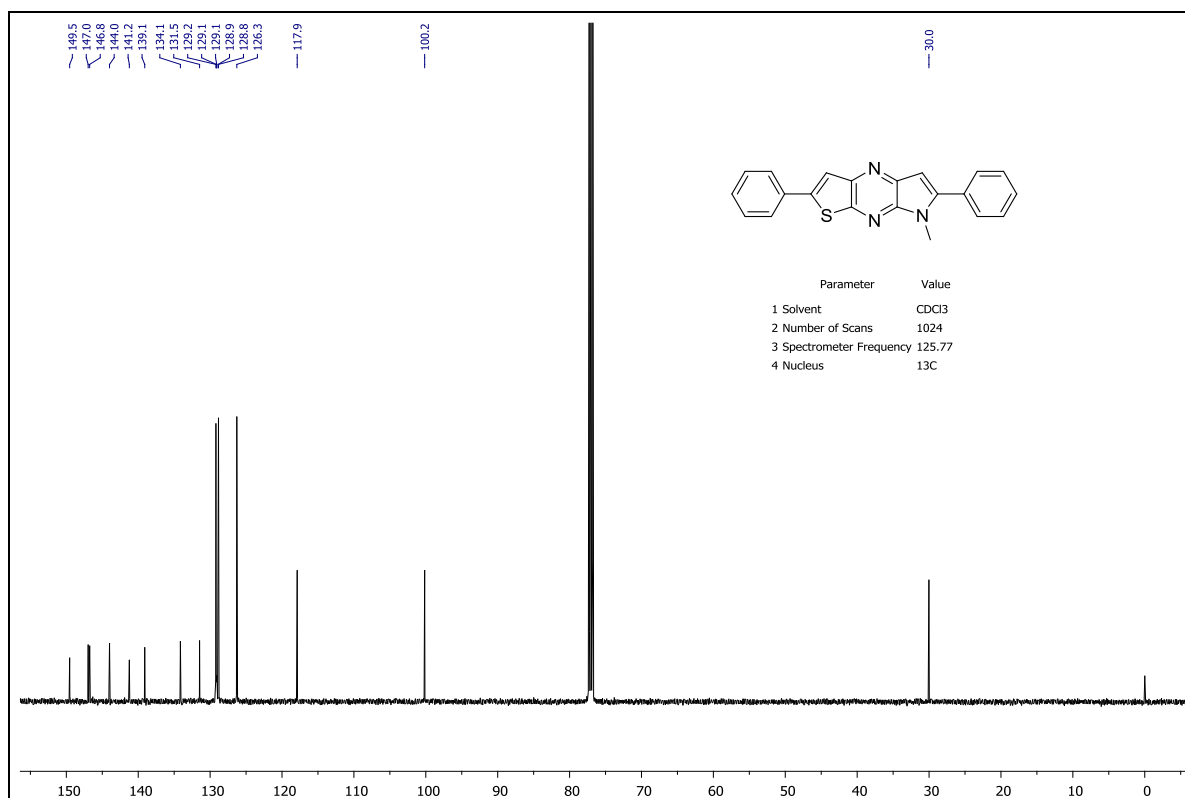

<sup>13</sup>C NMR – 13b

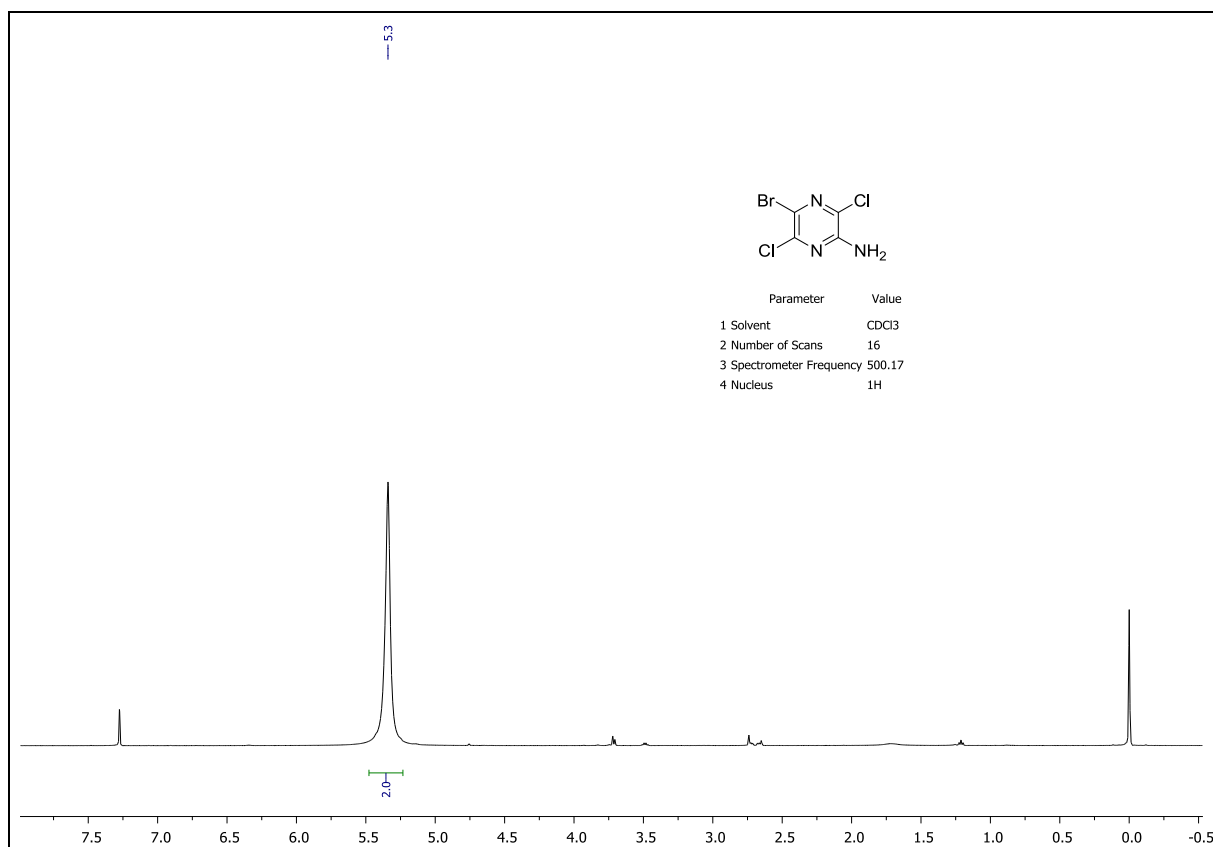

<sup>1</sup>H NMR – 15

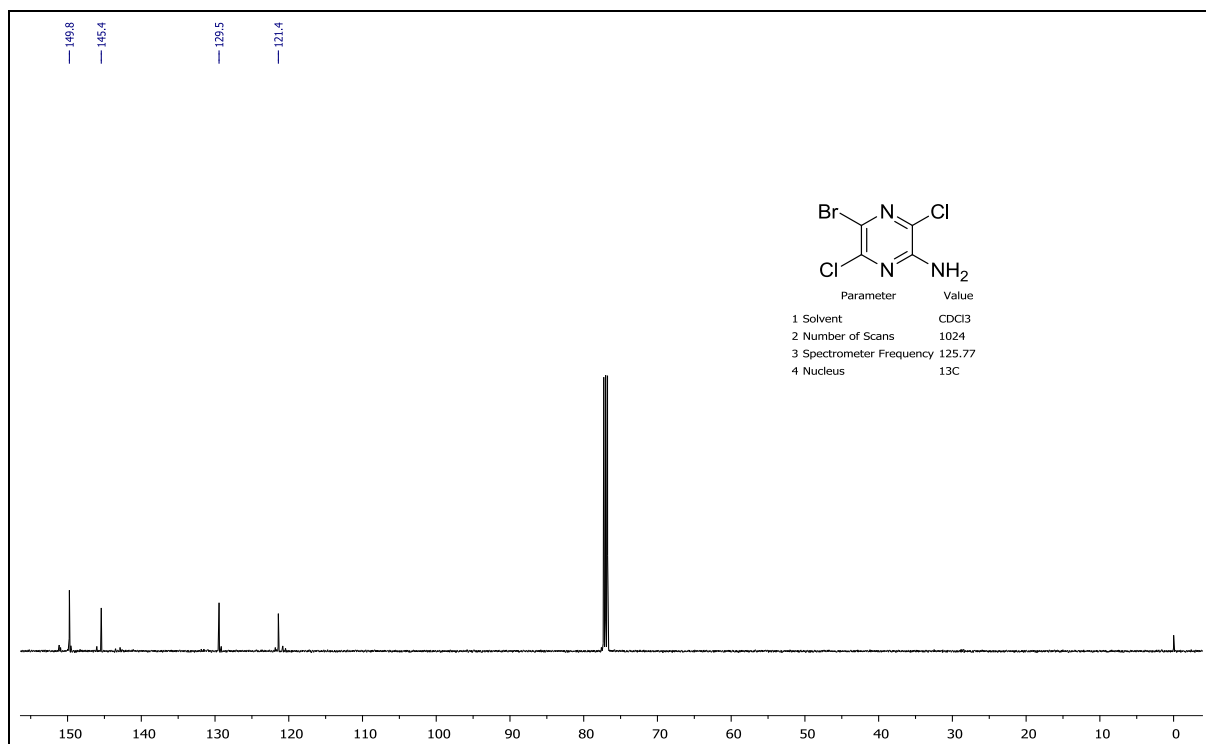

<sup>13</sup>C NMR – 15

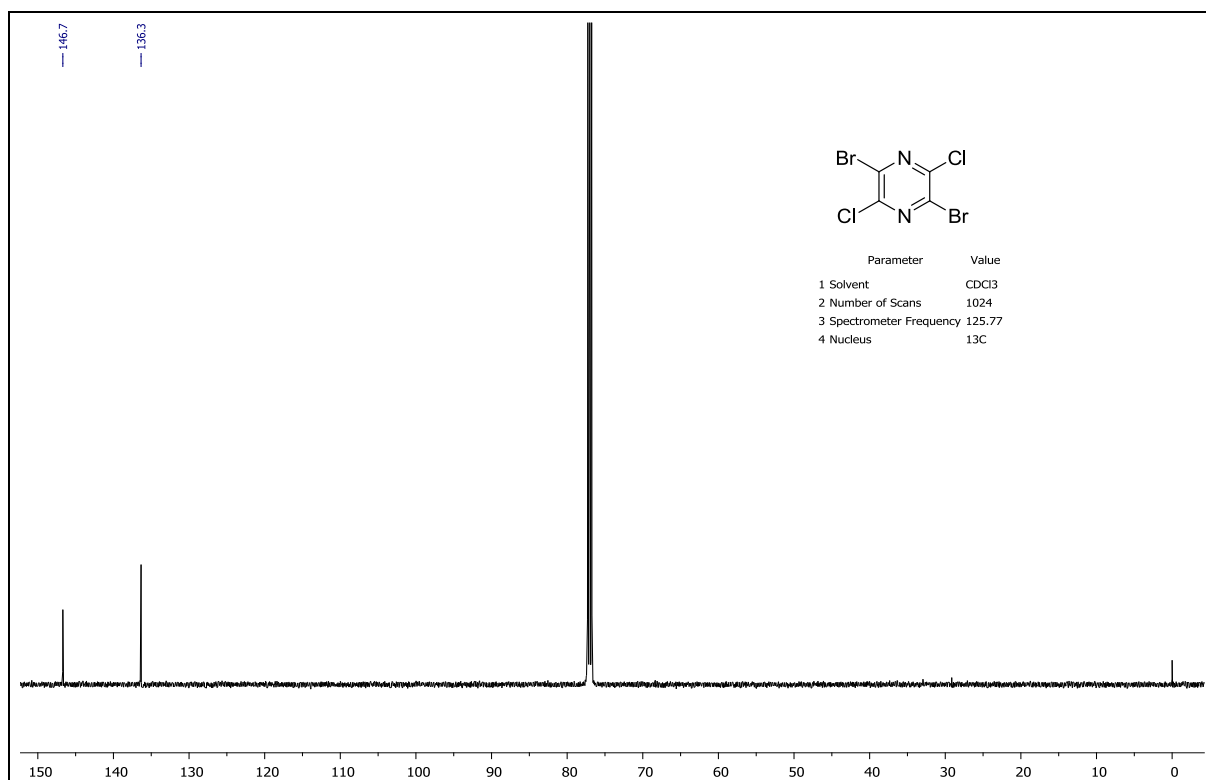

<sup>1</sup>H NMR – 16

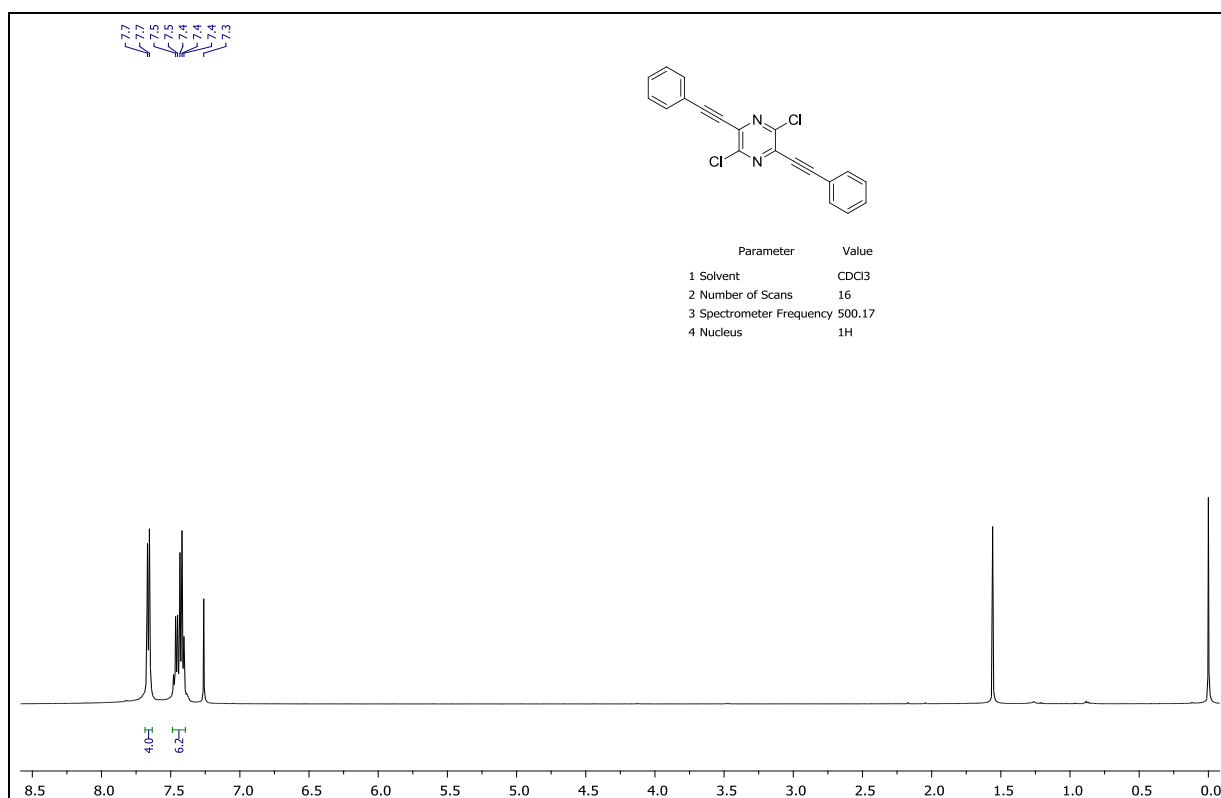

<sup>1</sup>H NMR – 17

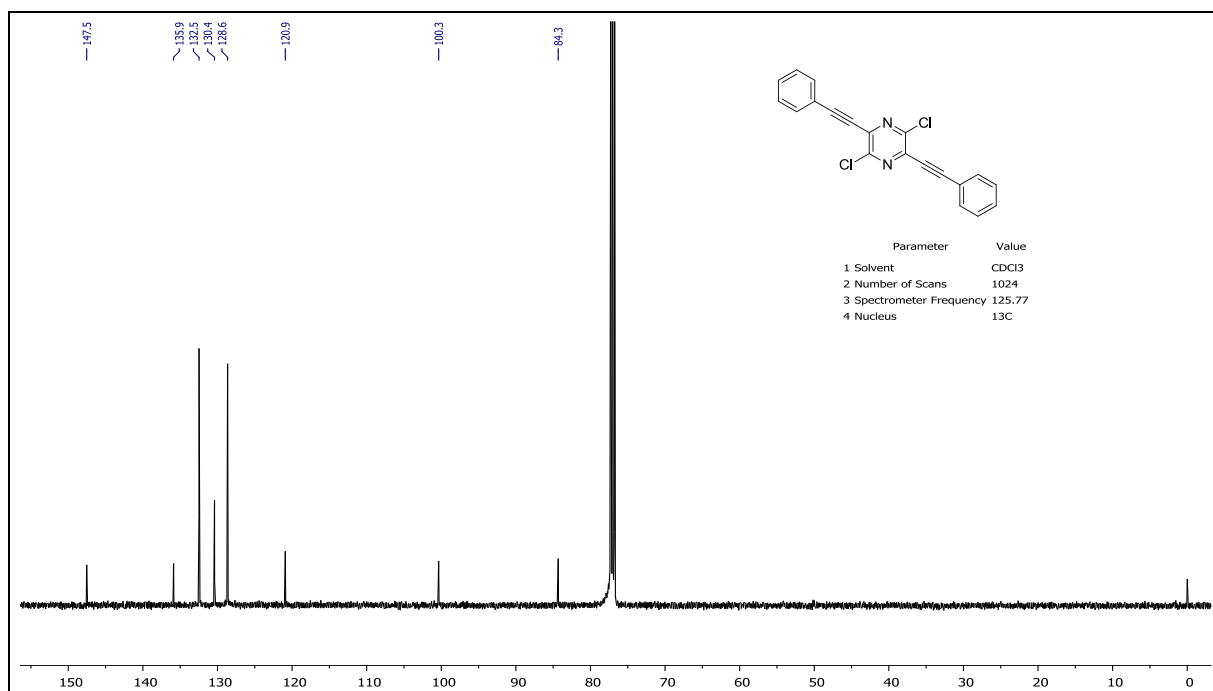

**<sup>13</sup>C NMR – 17**

**LC-MS and HRMS spectra of compounds**

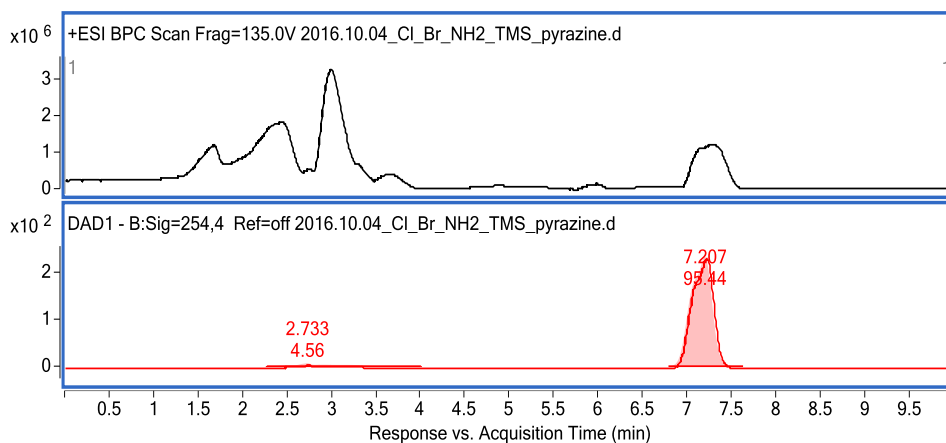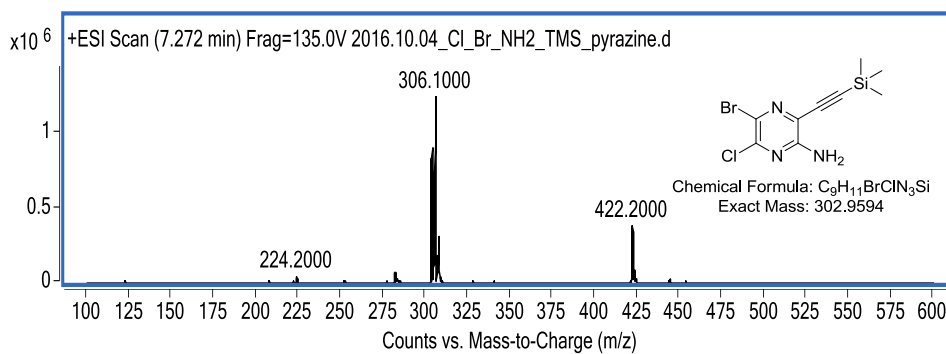

**LC/MS – 1a**

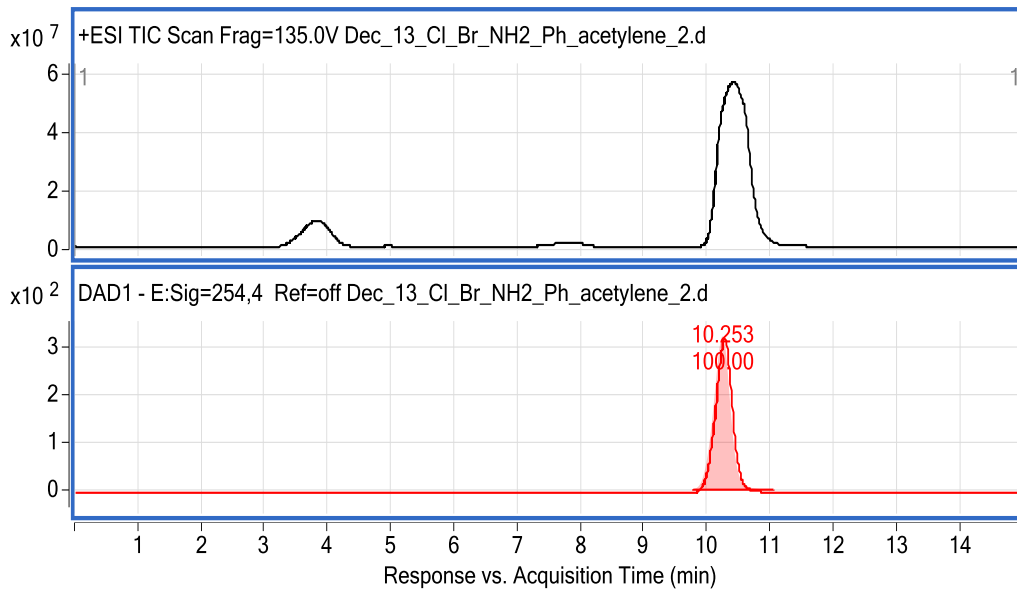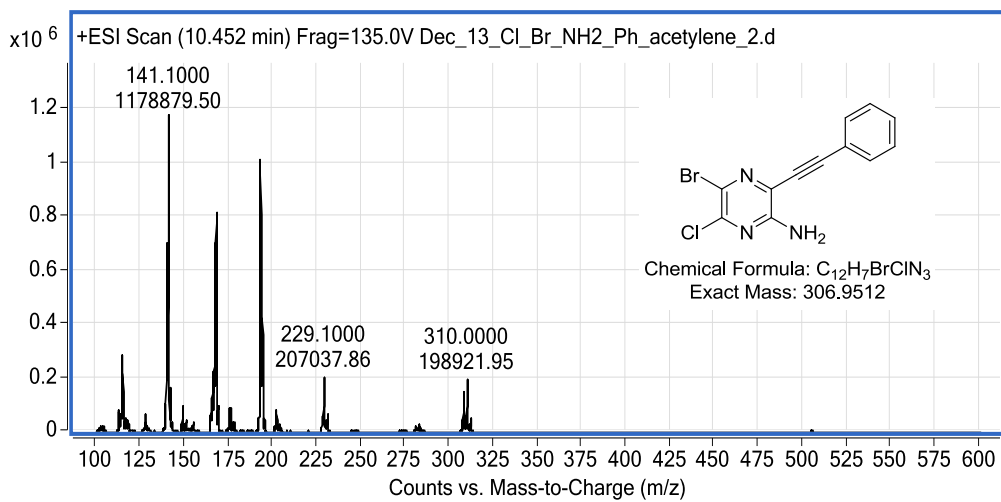

**LC/MS – 1b**

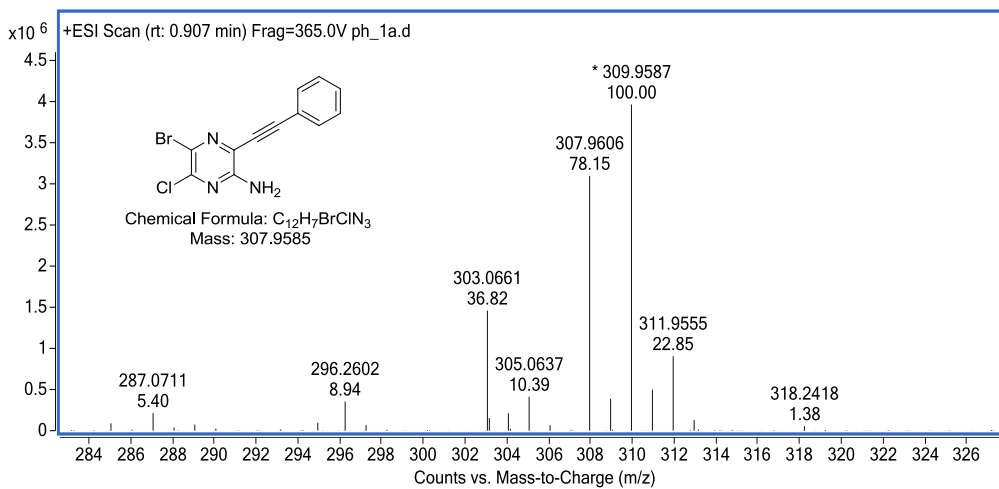

**HR/MS – 1b**

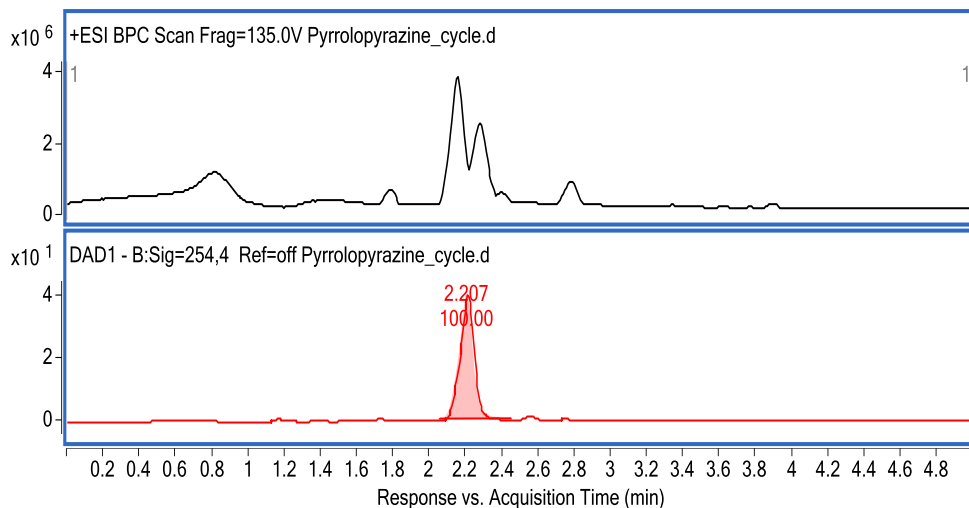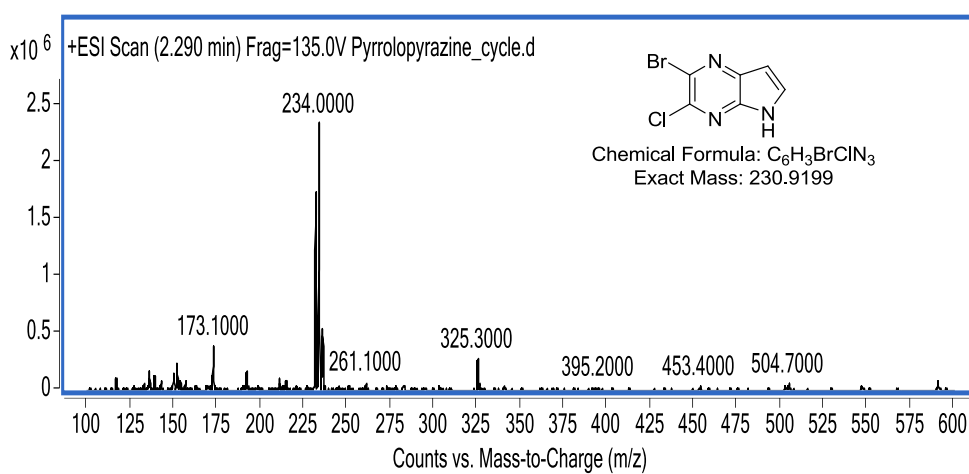

LC/MS – 2a

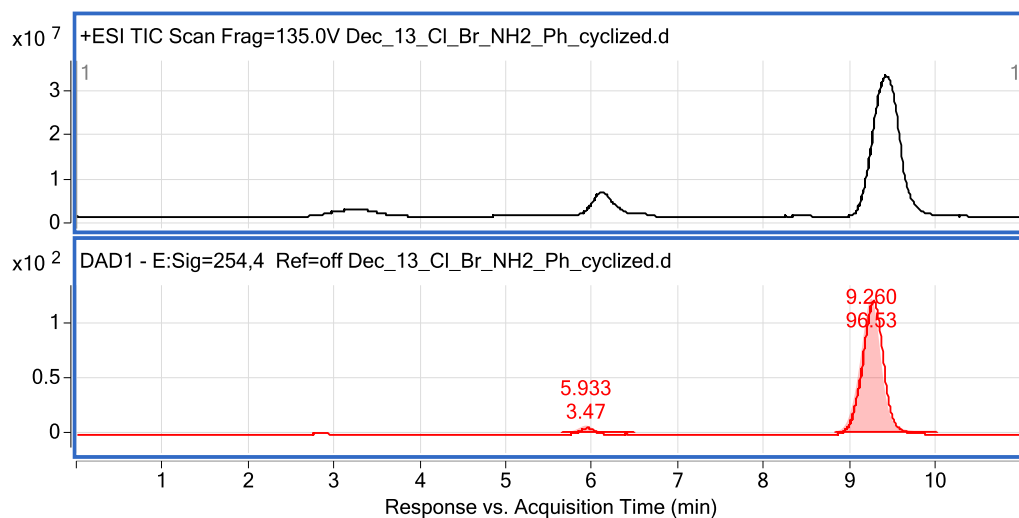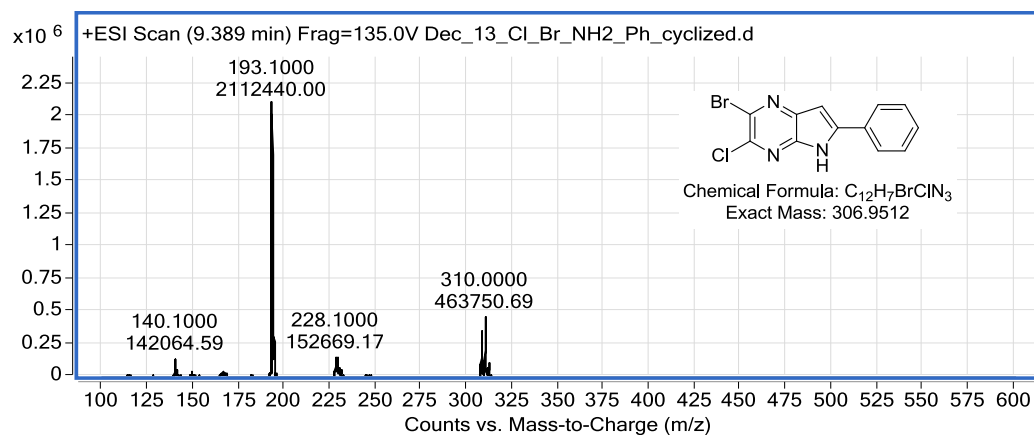

**LC/MS – 2b**

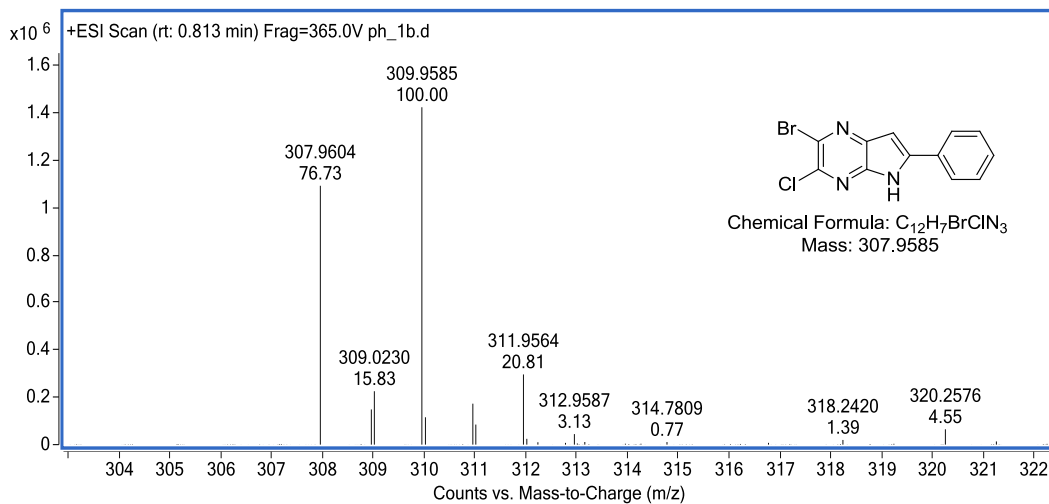

**HR/MS – 2b**

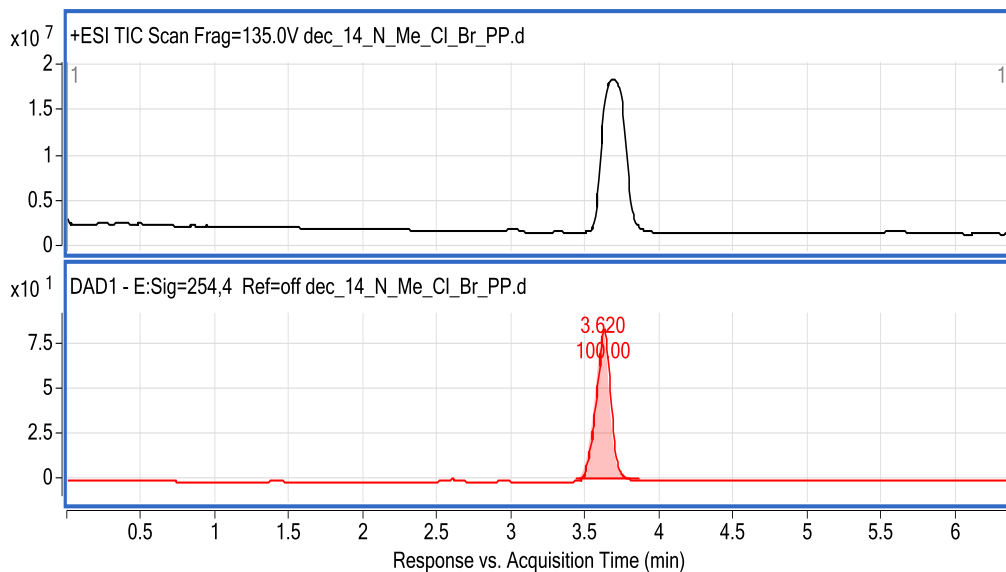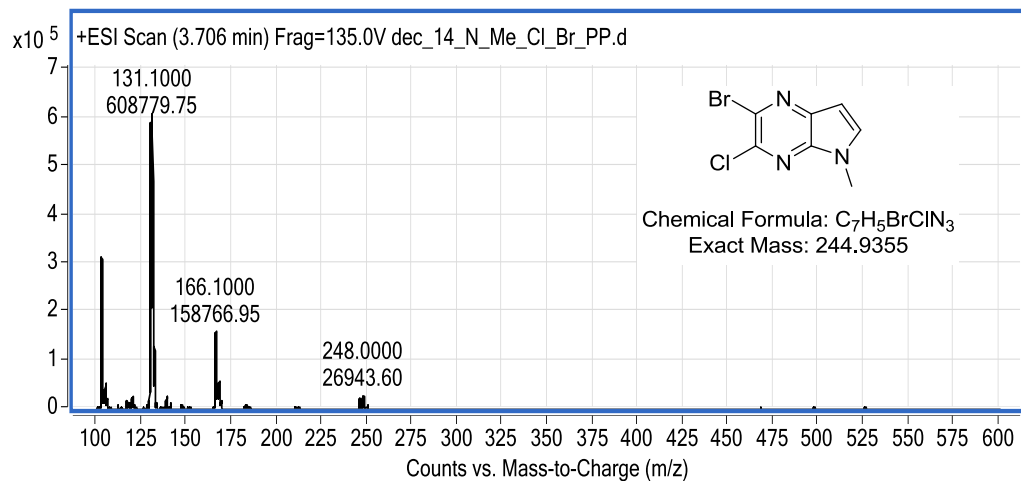

### LC/MS – 3a

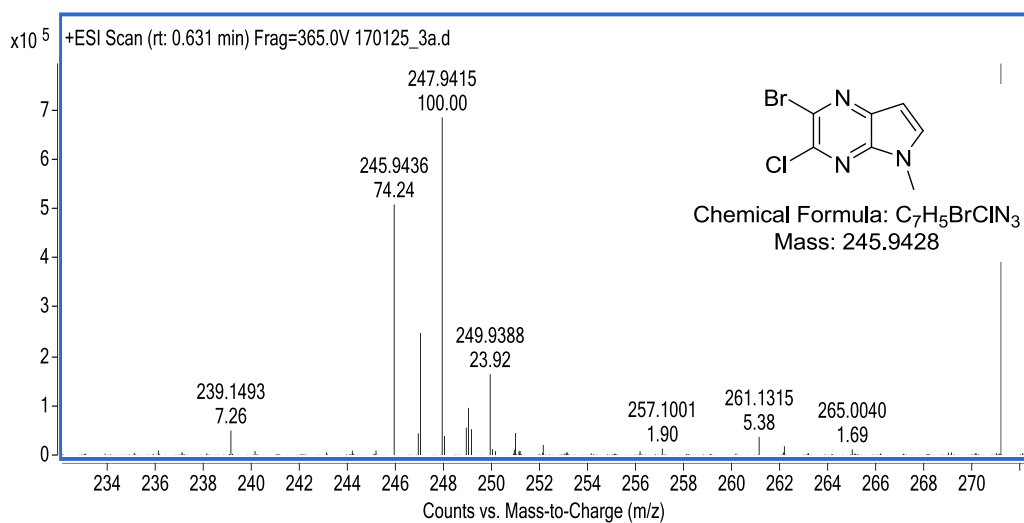

### HR/MS – 3a



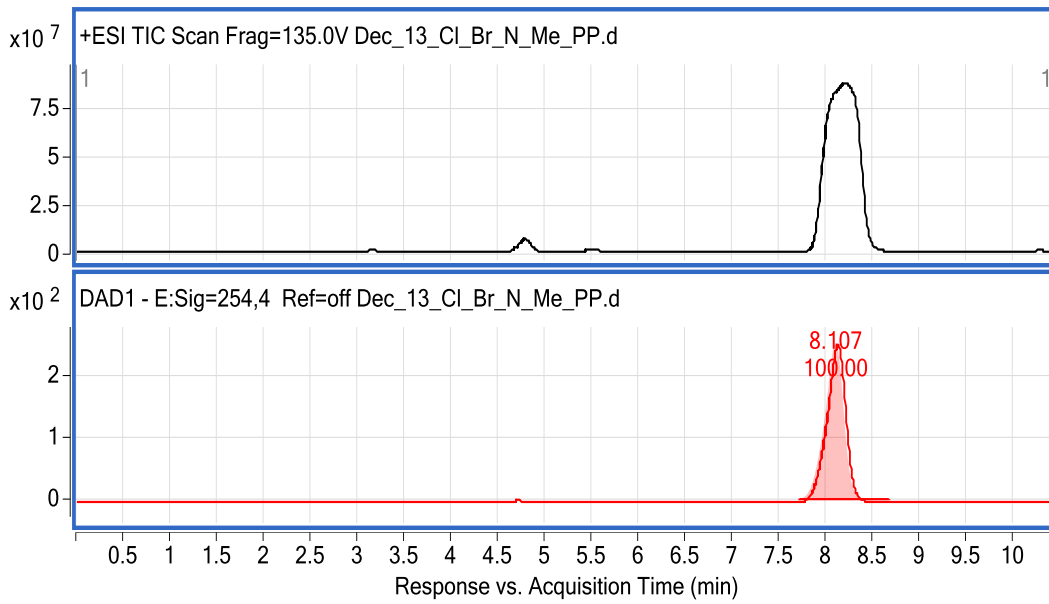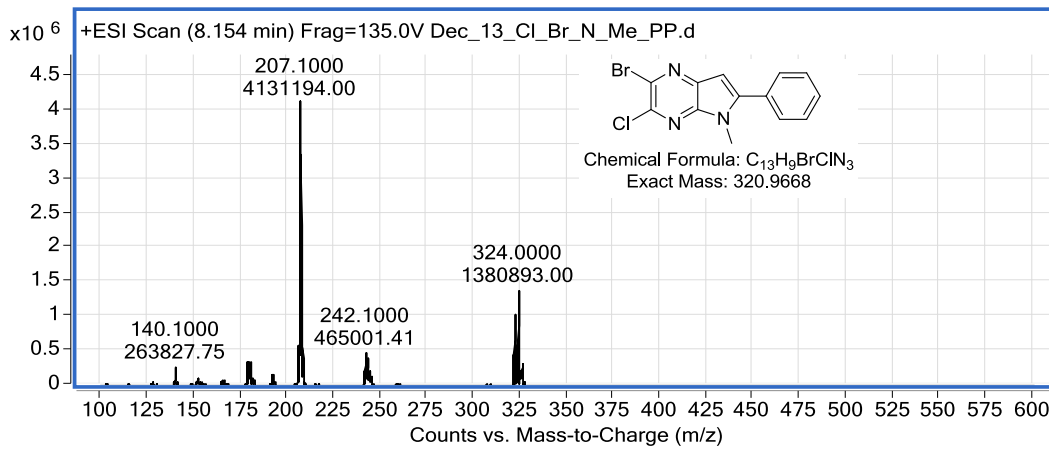

### LC/MS – 3b

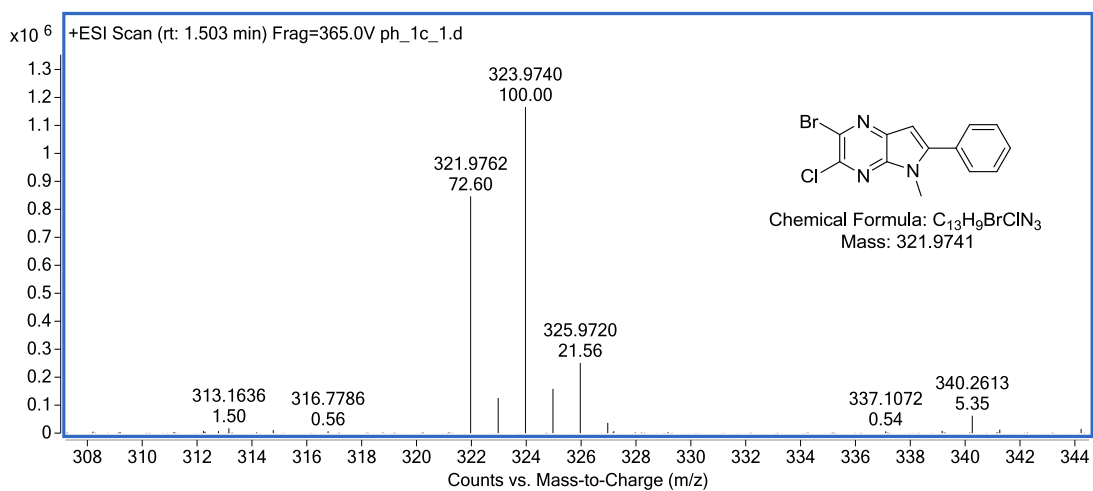

### HR/MS – 3b

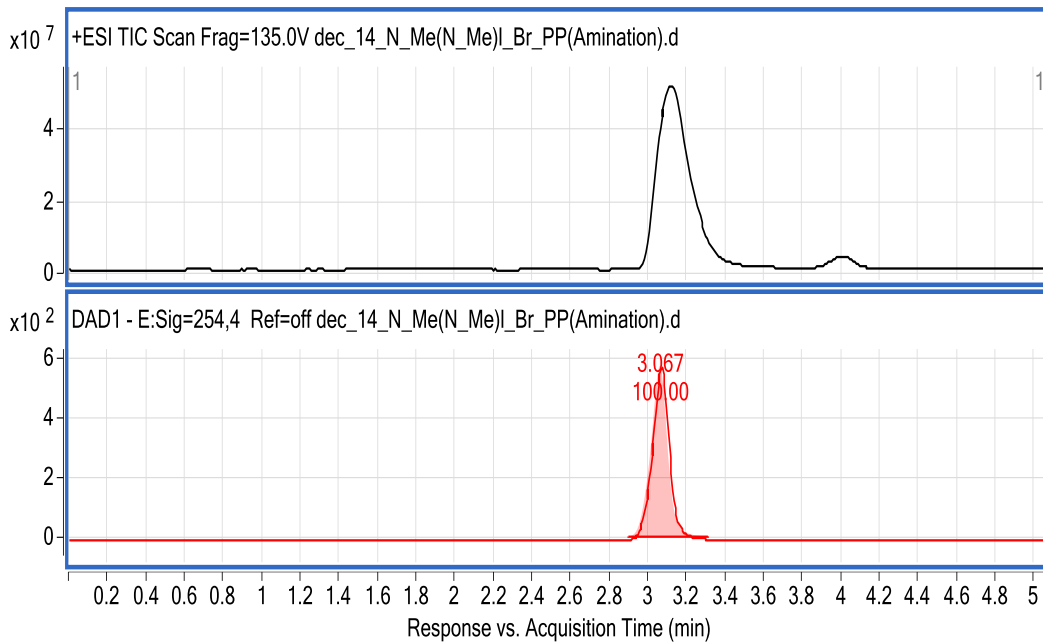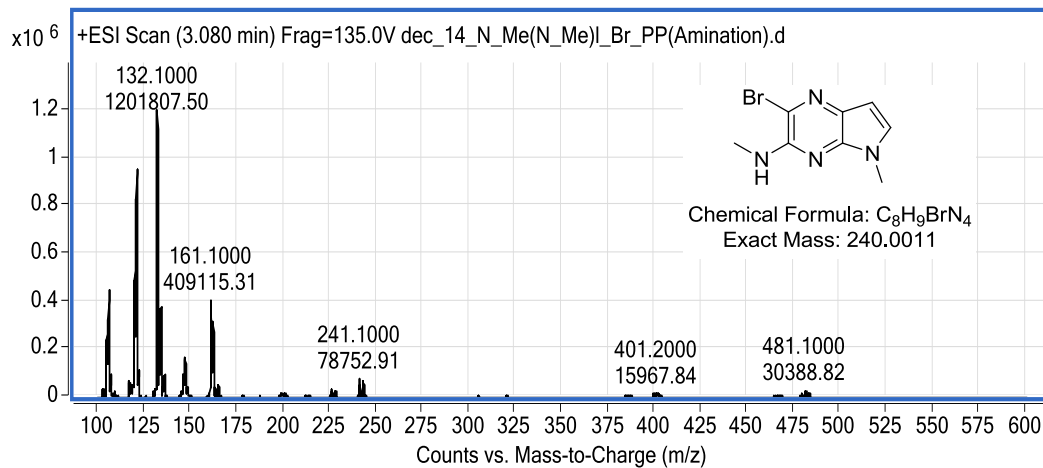

LC/MS – 4a

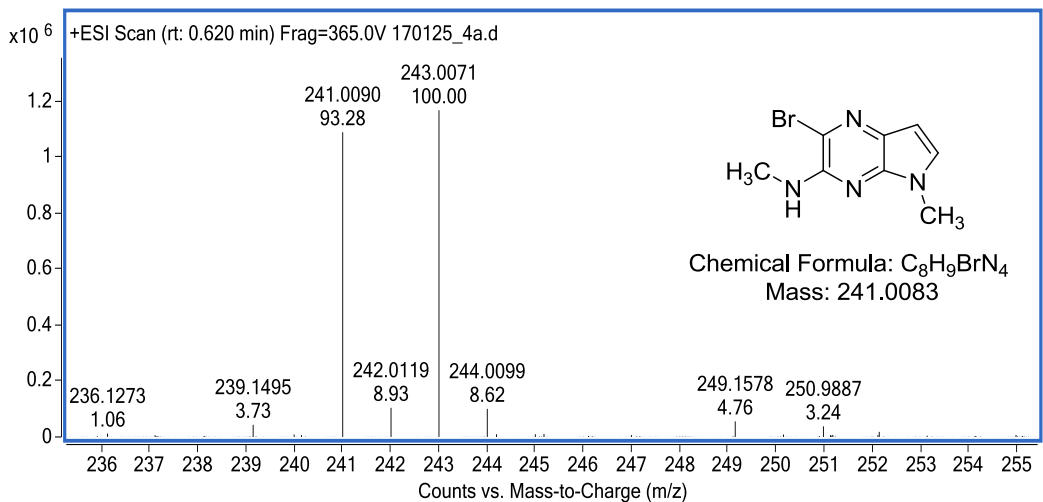

HR/MS – 4a

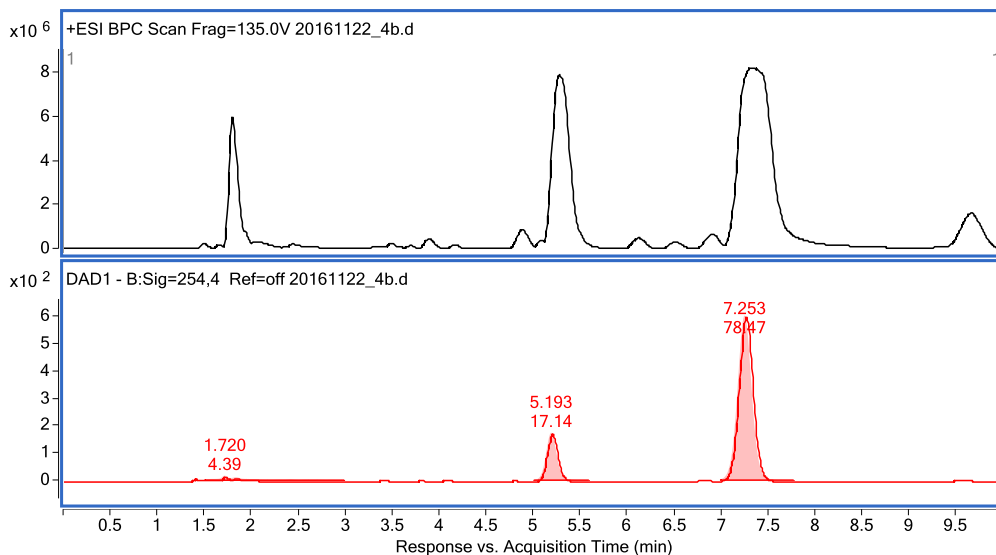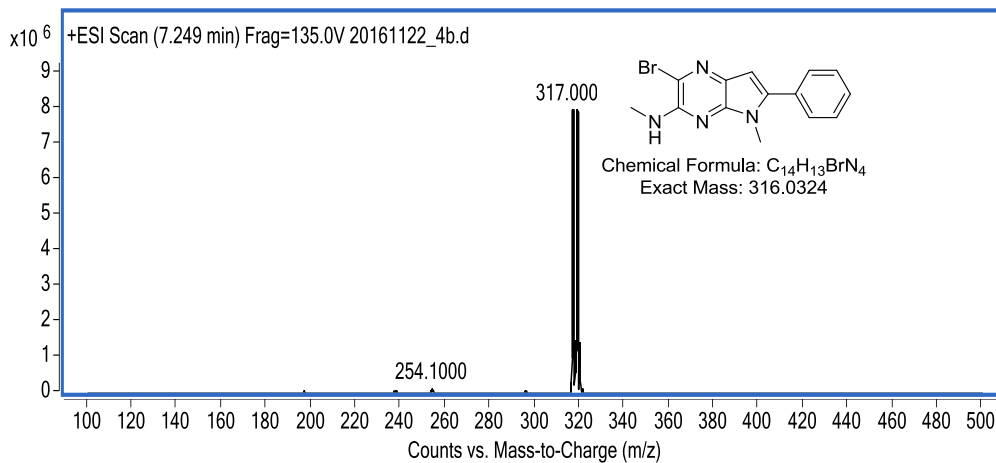

### LC/MS – 4b

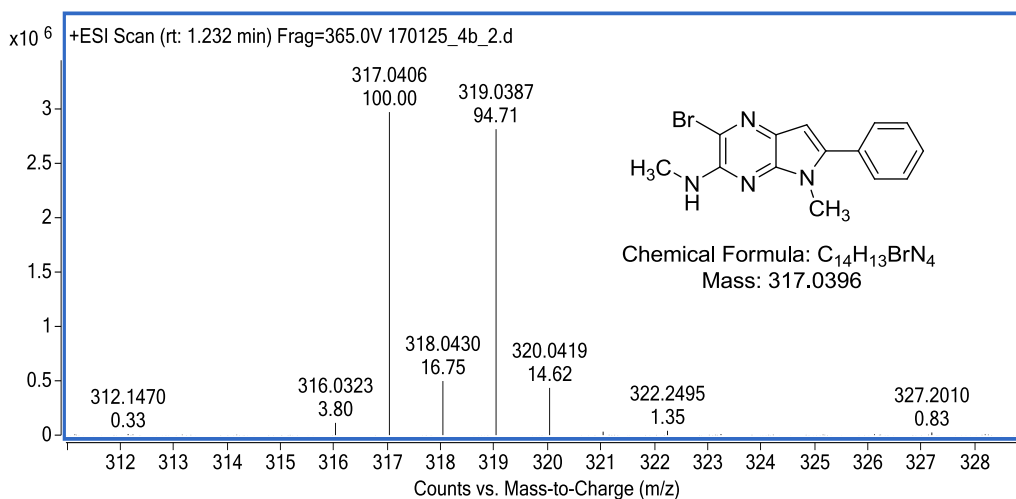

### HR/MS – 4b

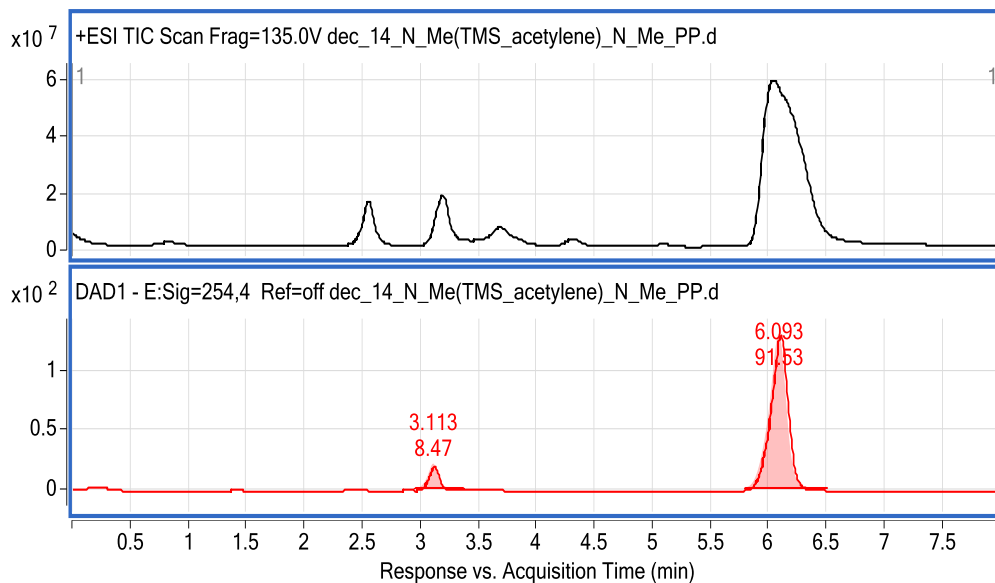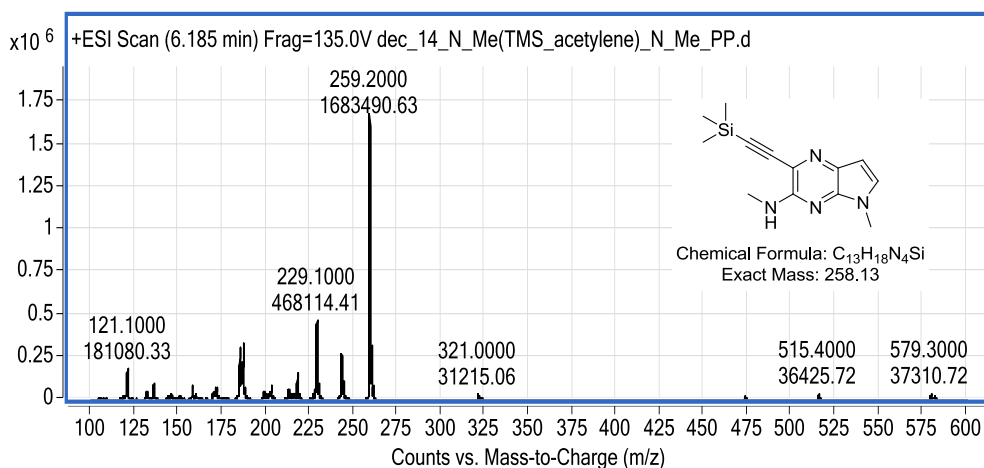

LC/MS – 5a

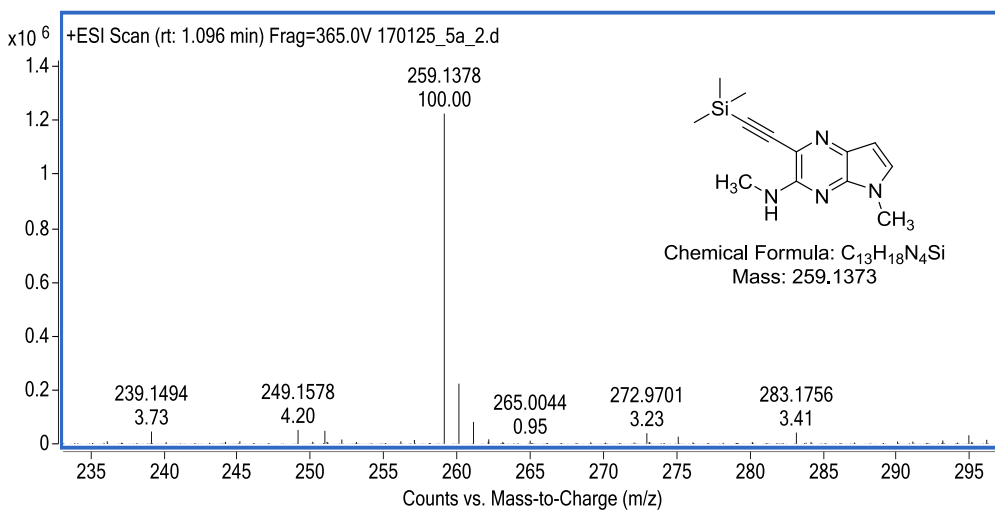

HR/MS – 5a

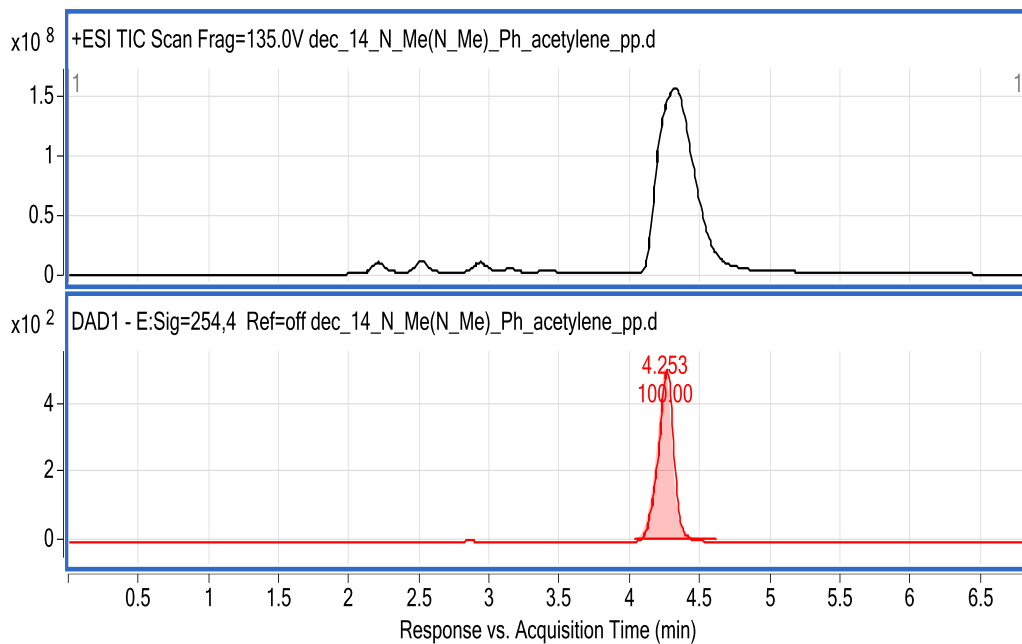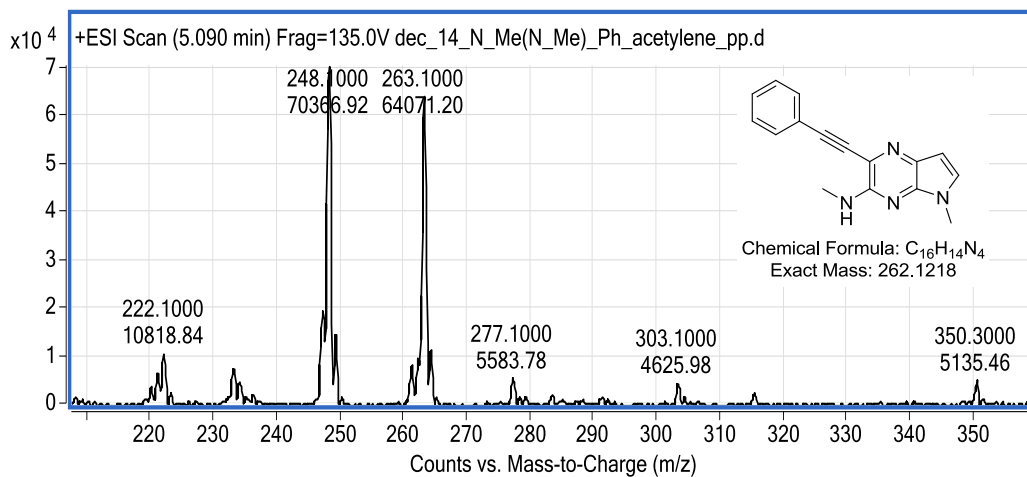

### LC/MS – 5b

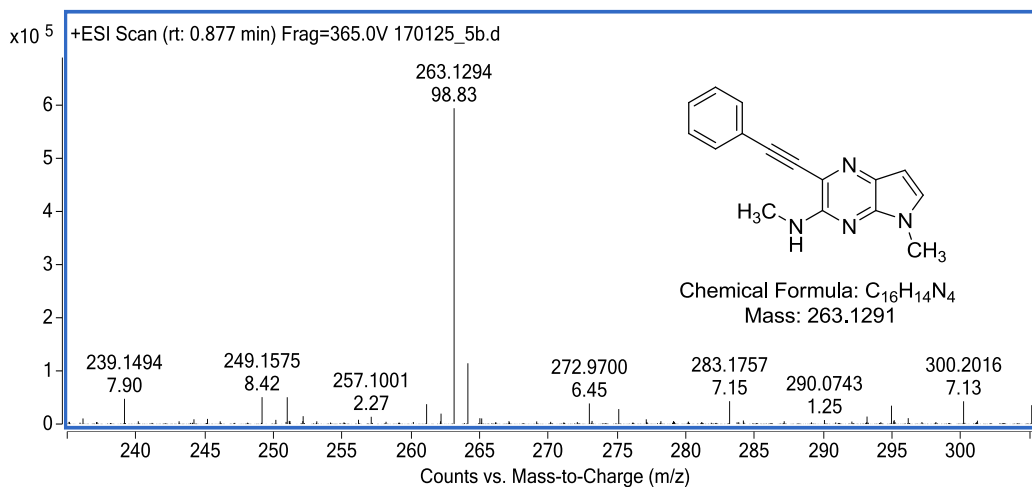

### HR/MS – 5b

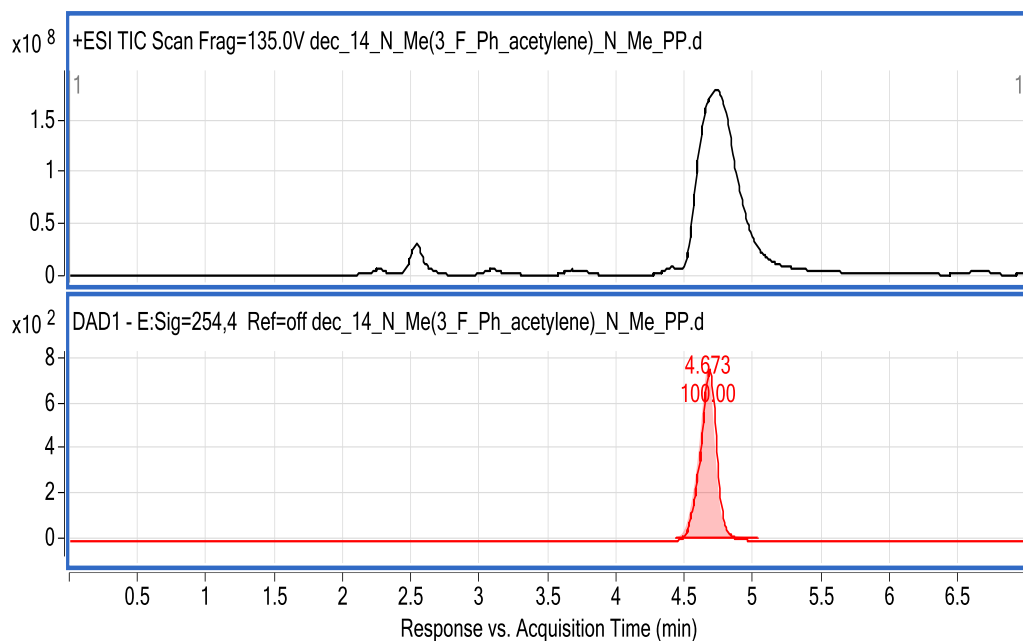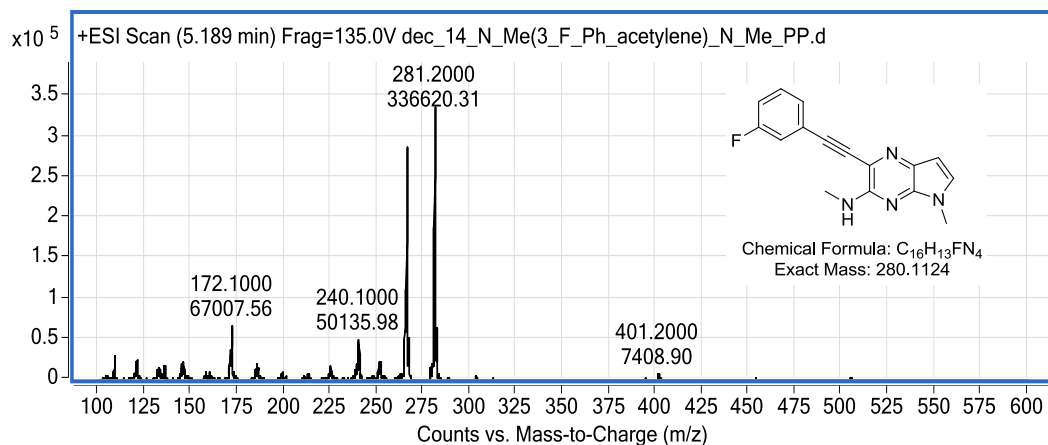

### LC/MS – 5c

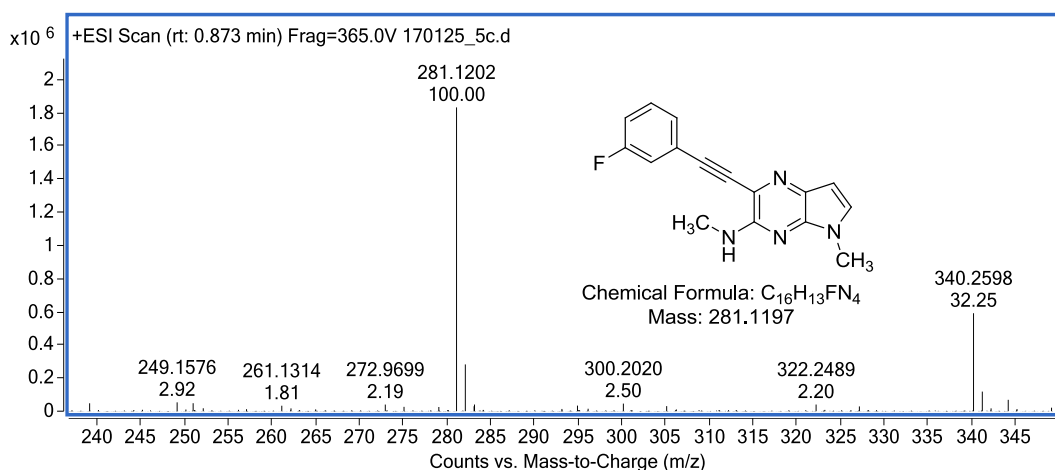

### HR/MS – 5c

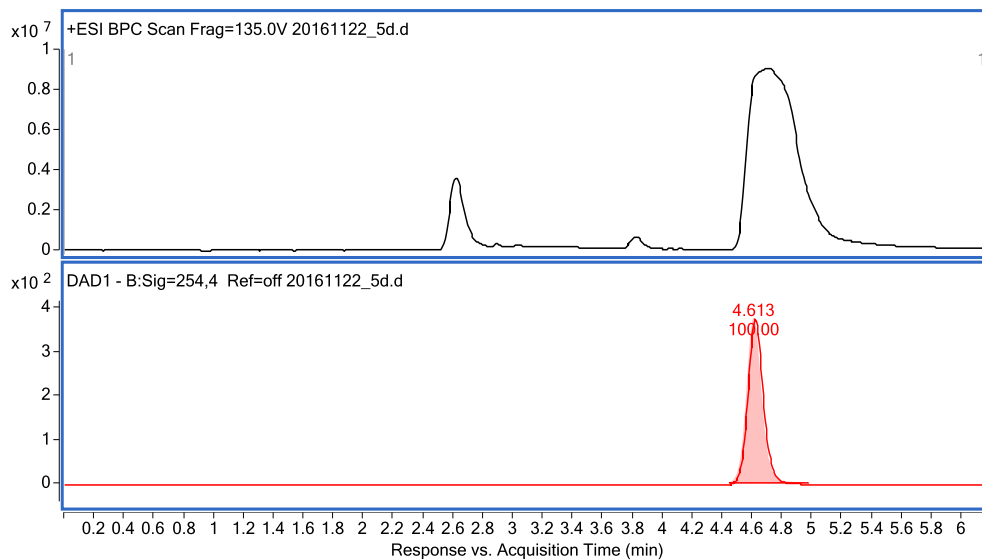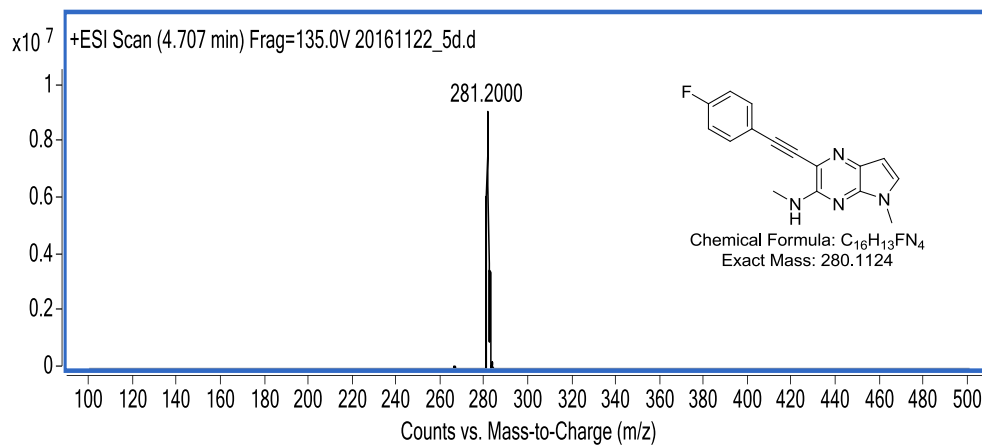

### LC/MS – 5d

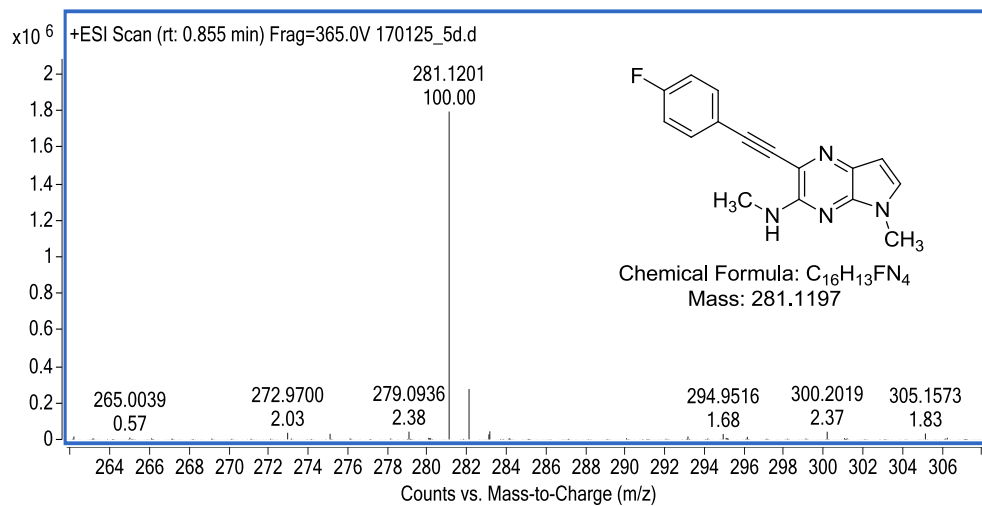

### HR/MS – 5d

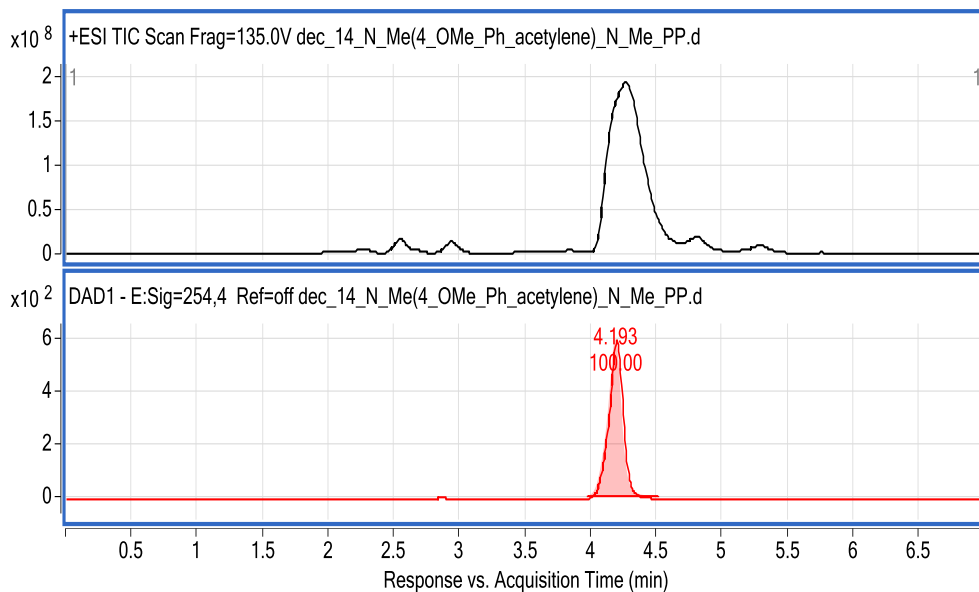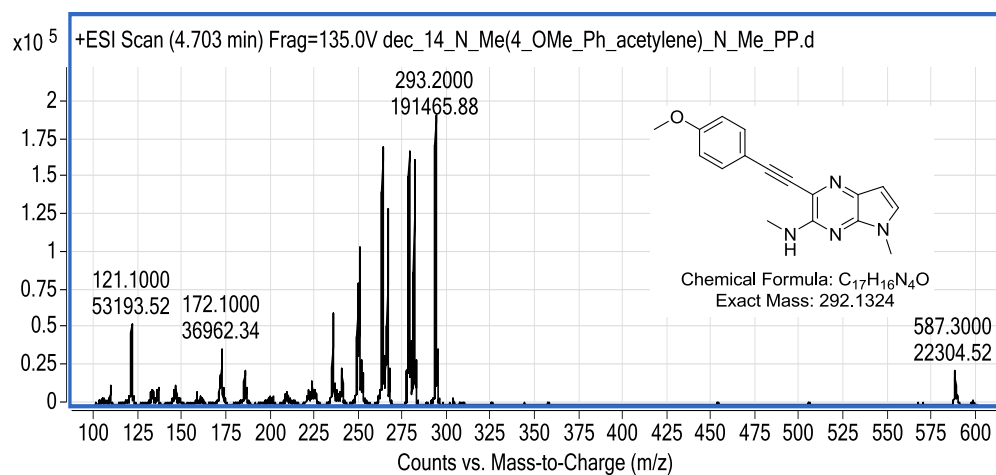

### LC/MS – 5e

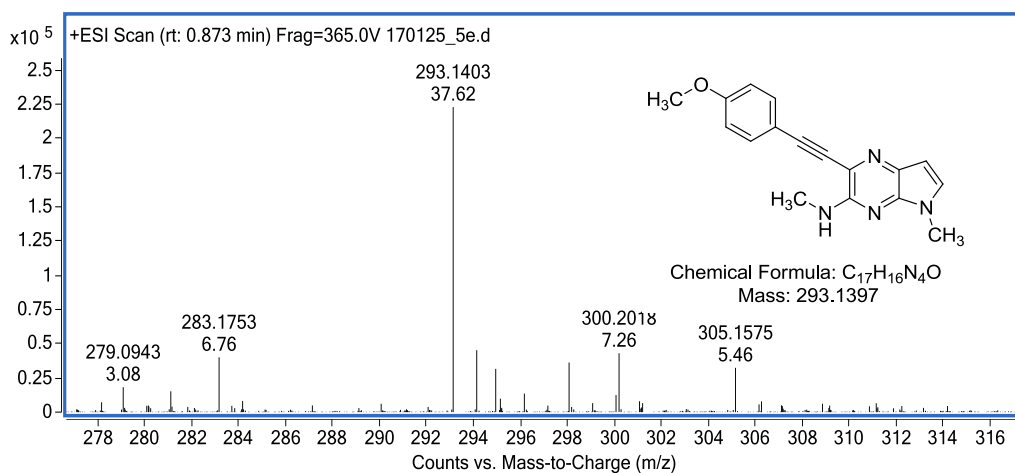

### HR/MS – 5e



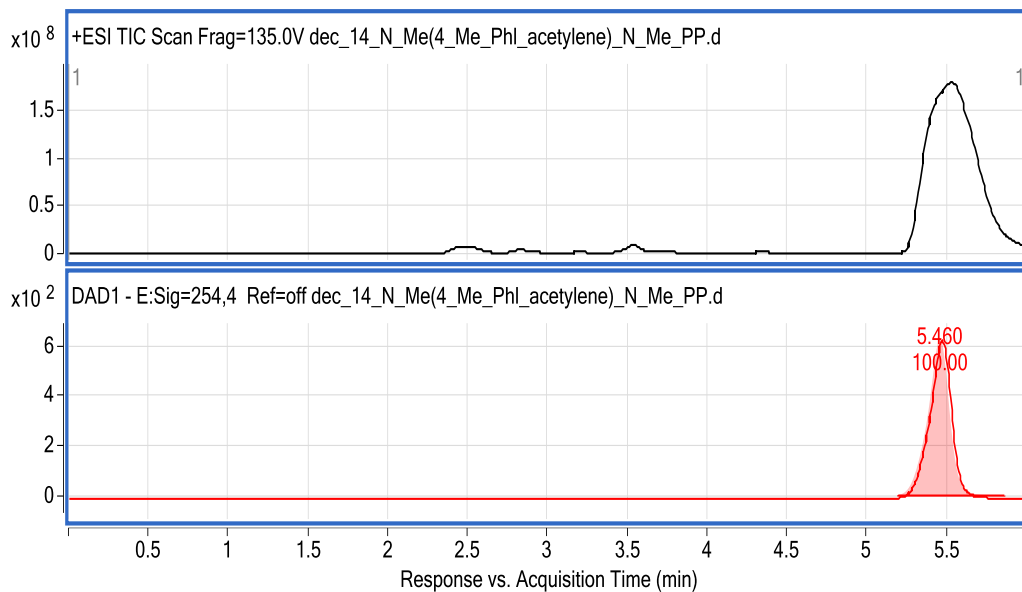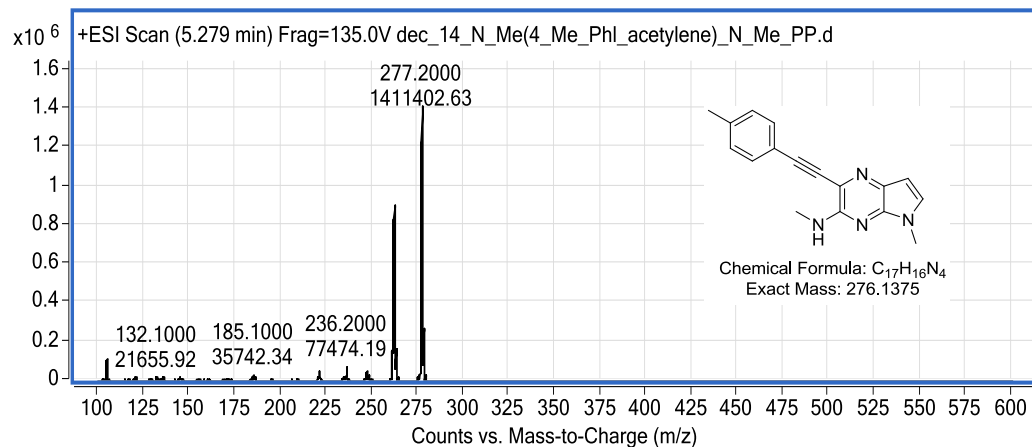

### LC/MS – 5f

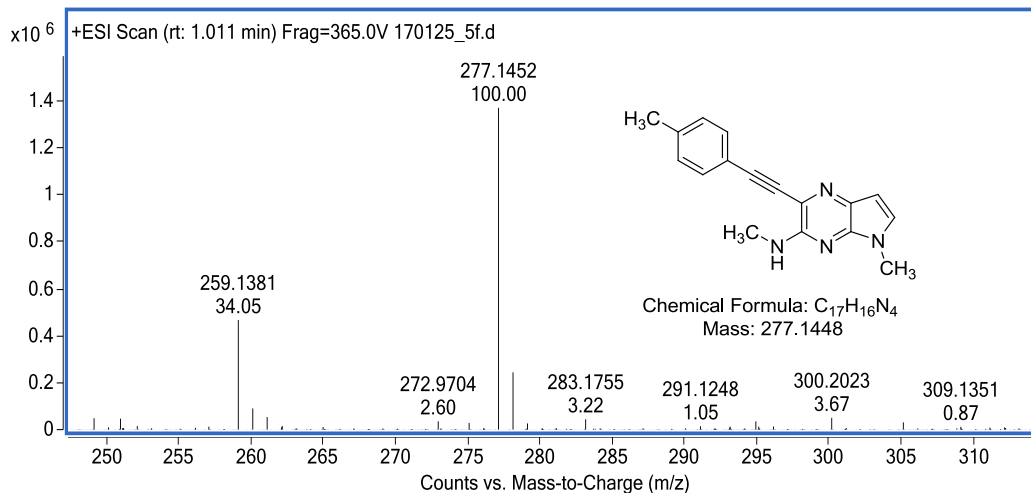

### HR/MS – 5f

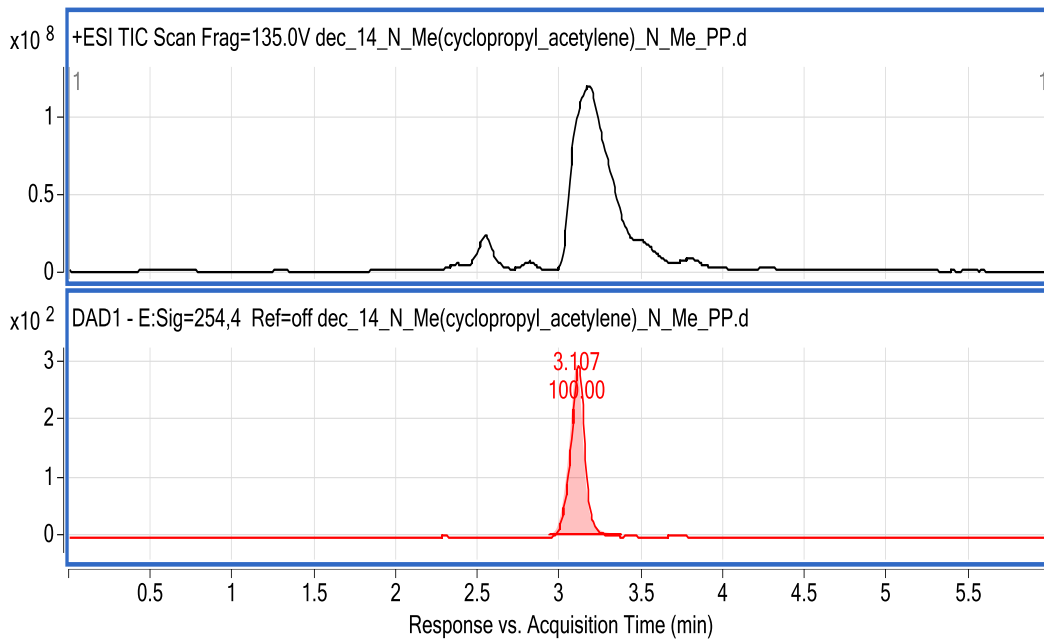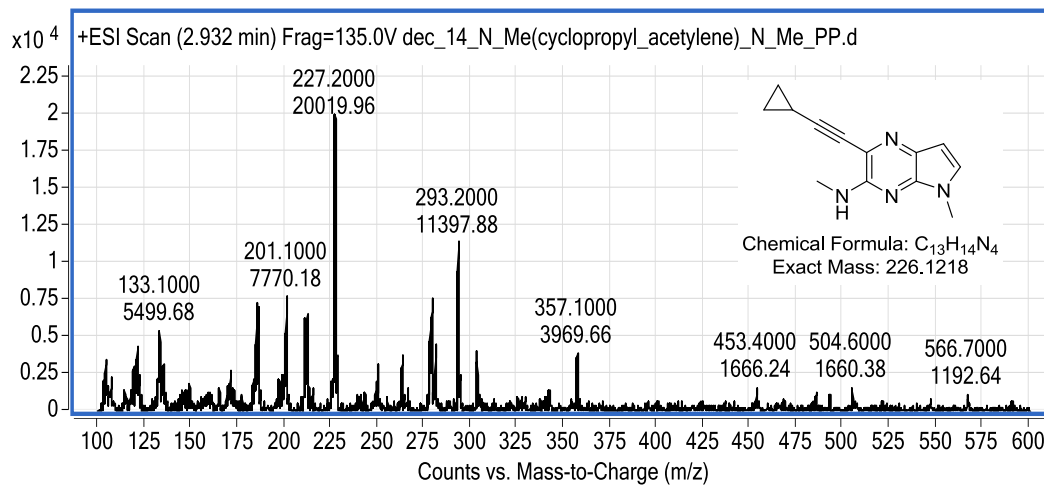

**LC/MS – 5g**

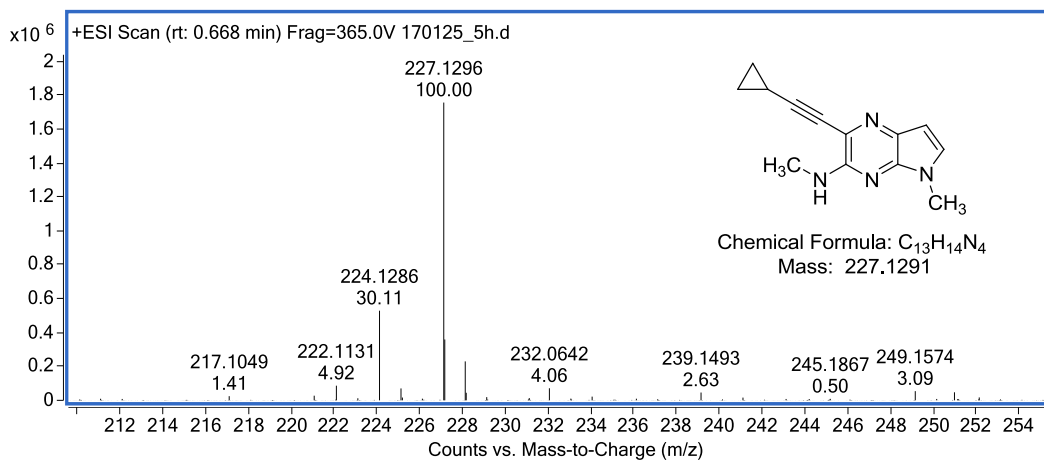

**HR/MS – 5g**

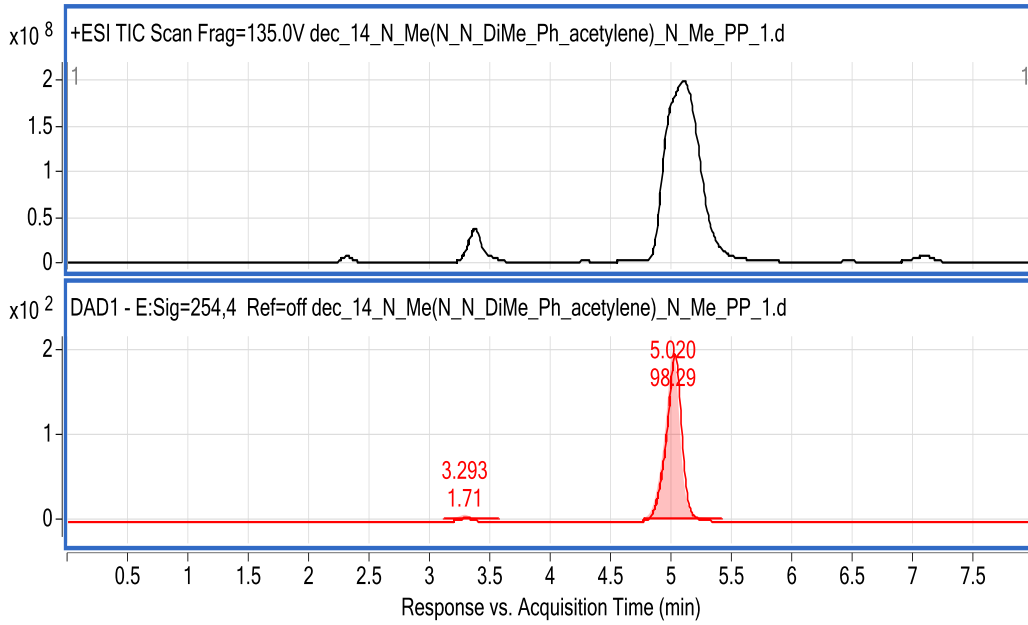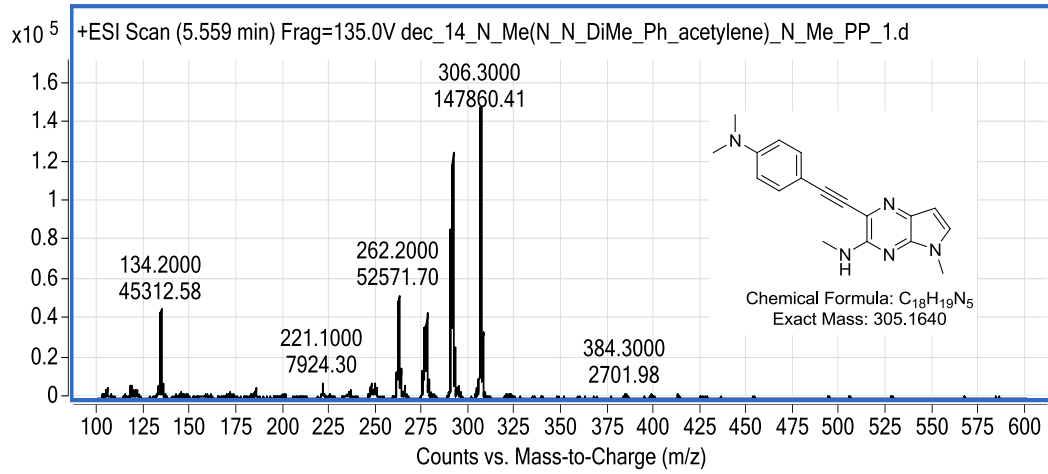

### LC/MS – 5h

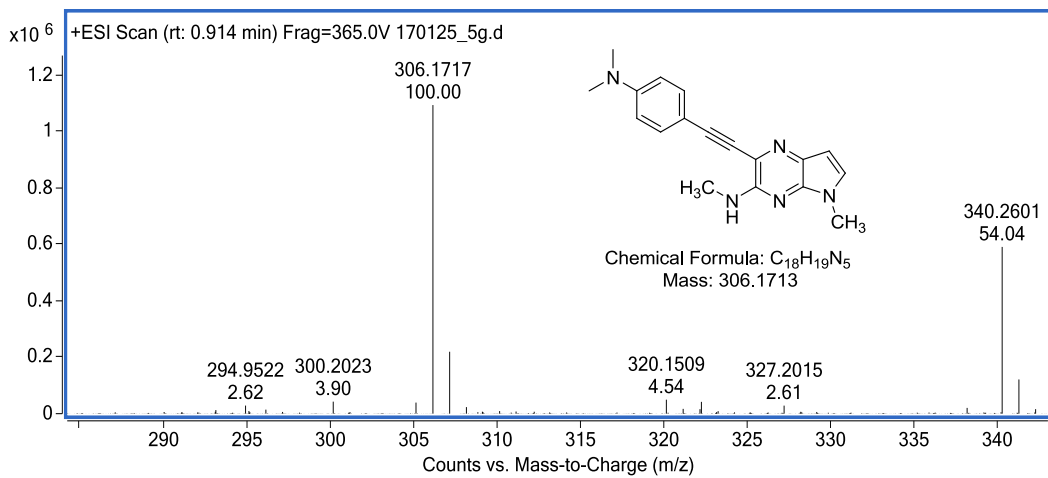

### HR/MS – 5h

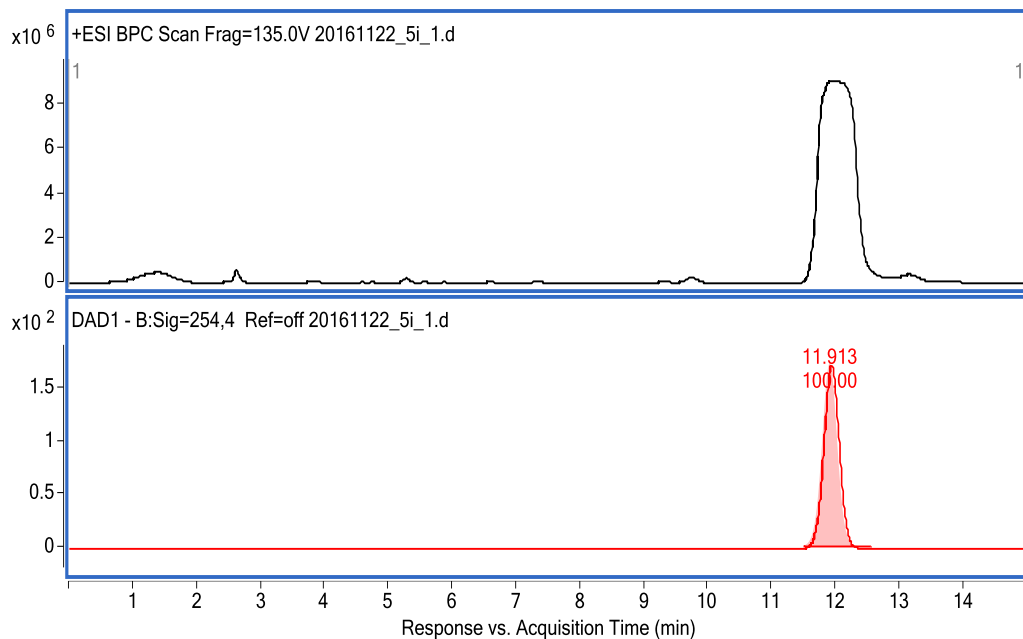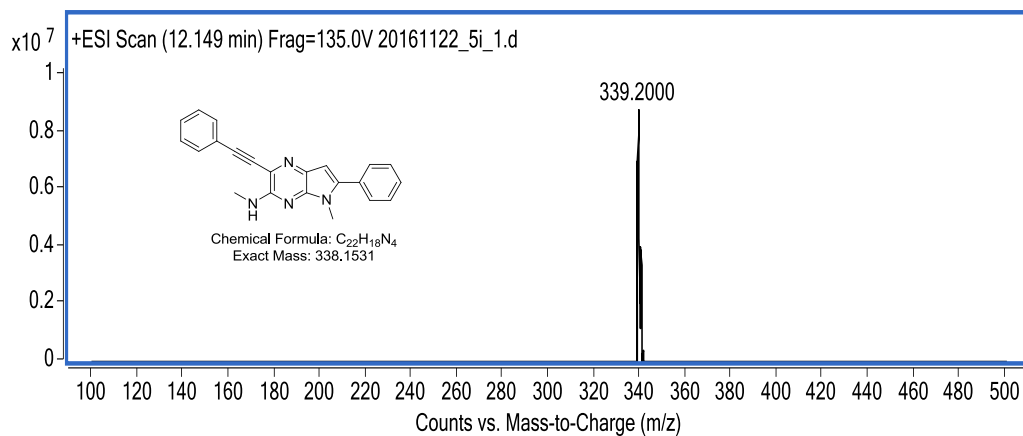

### LC/MS – 5i

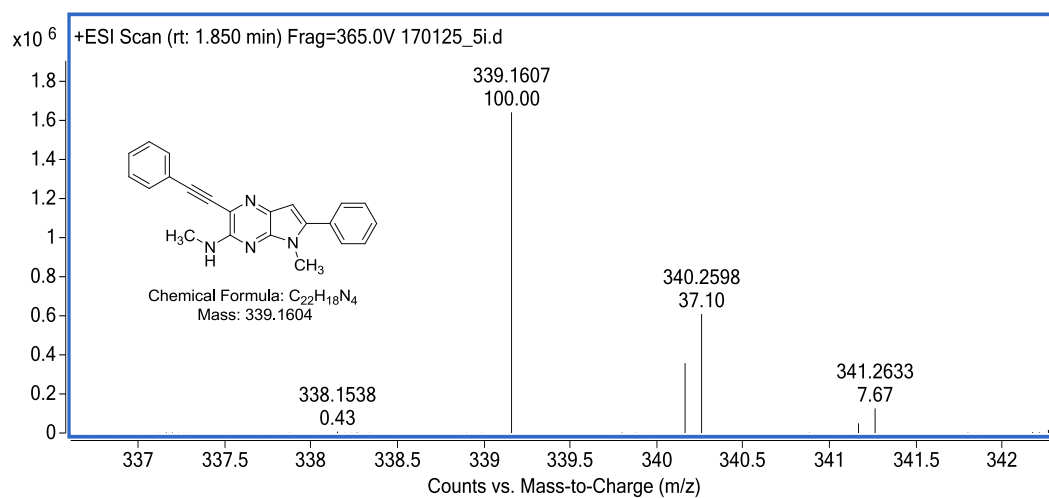

### HR/MS – 5i

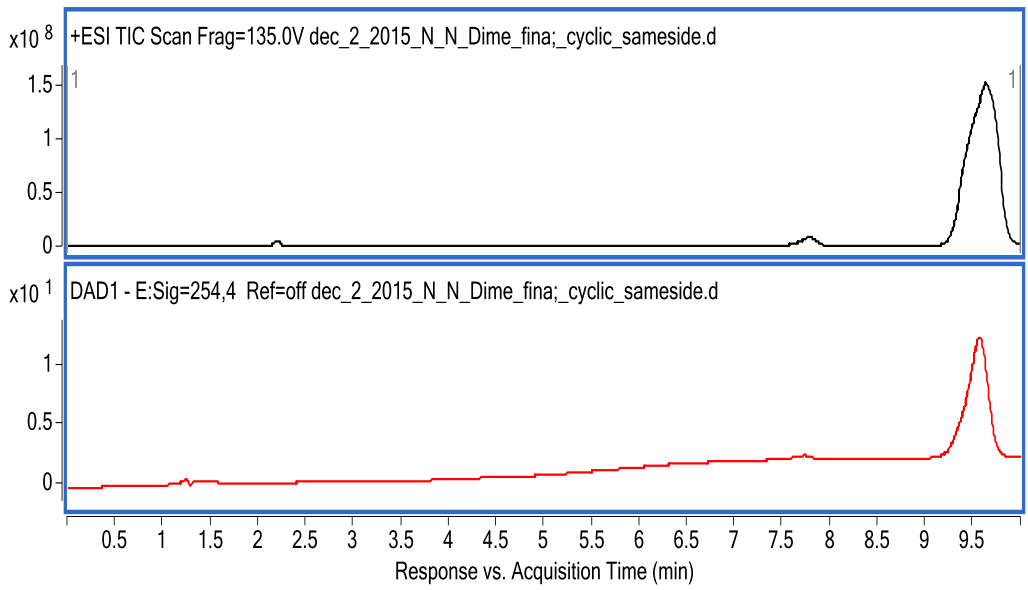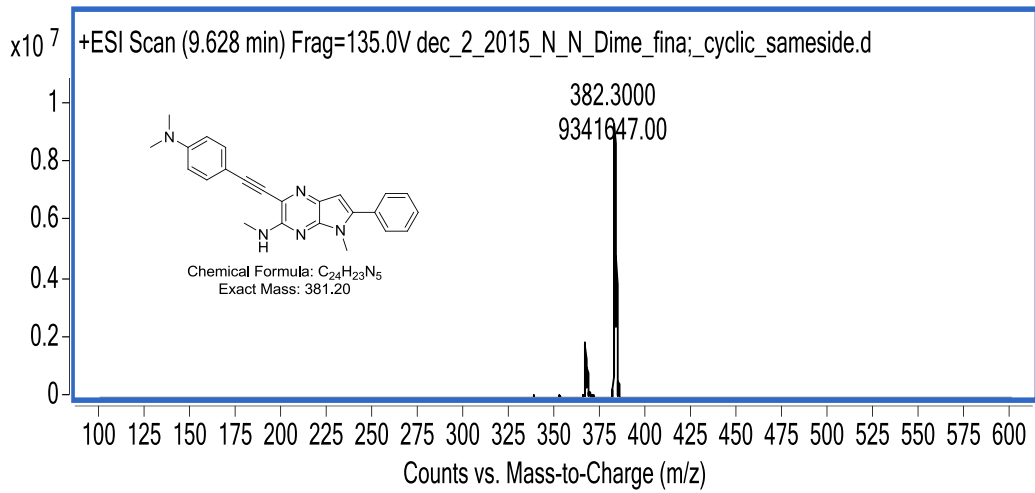

**LC/MS – 5j**

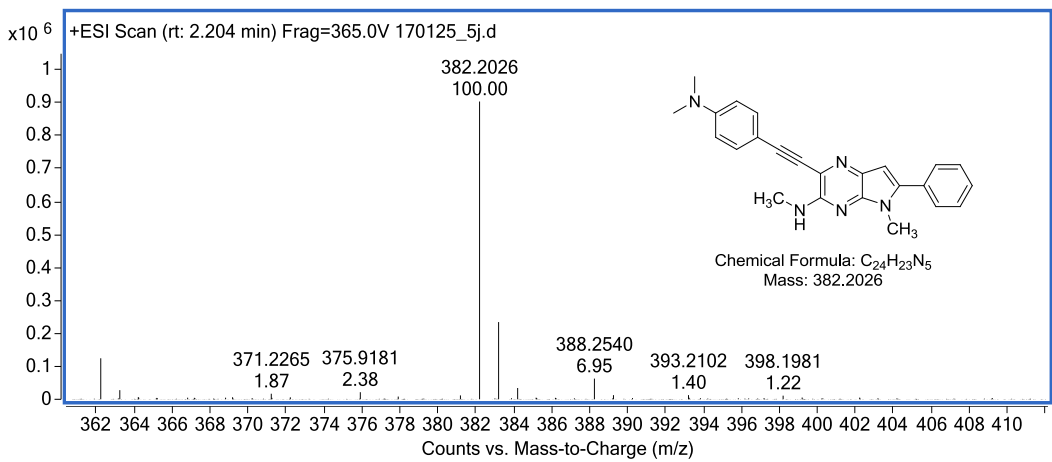

**HR/MS – 5j**

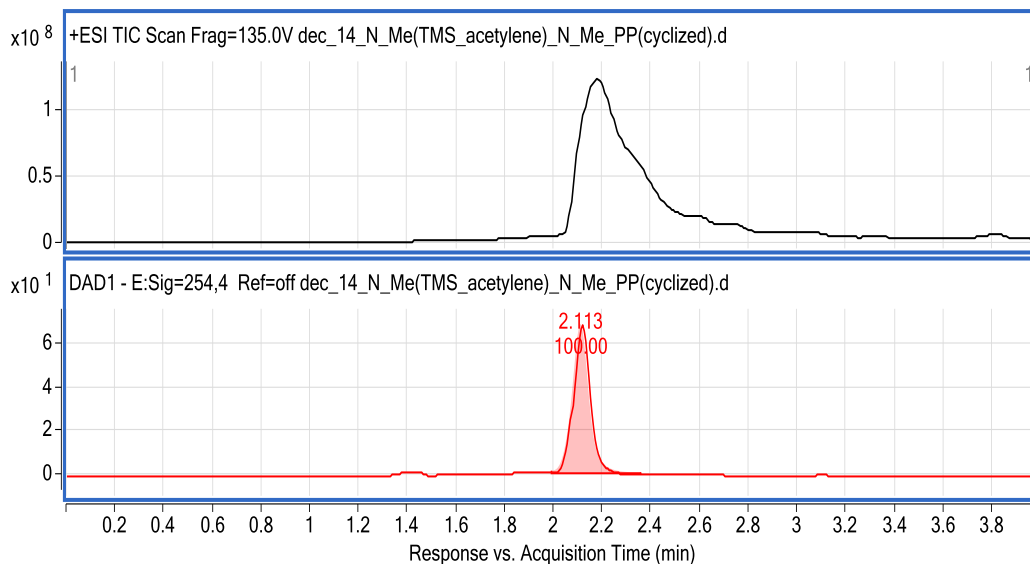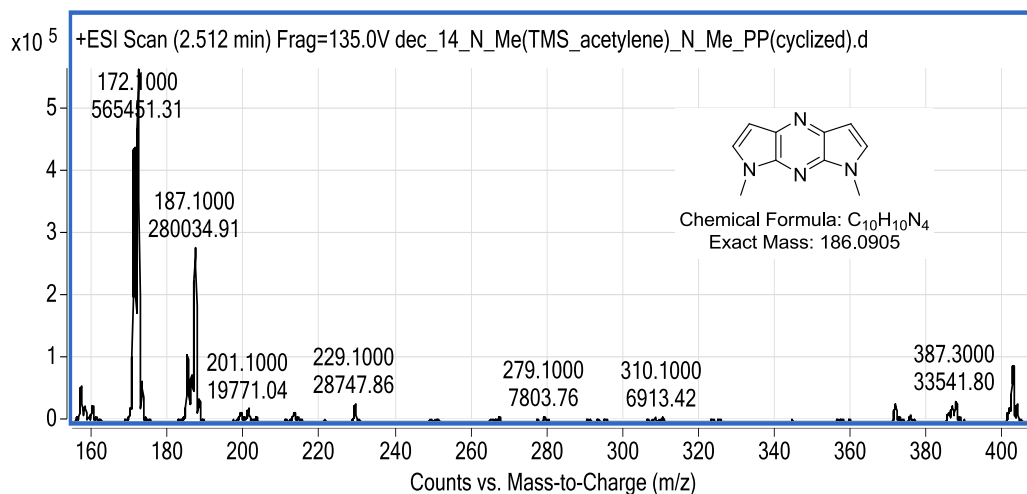

### LC/MS – 6a

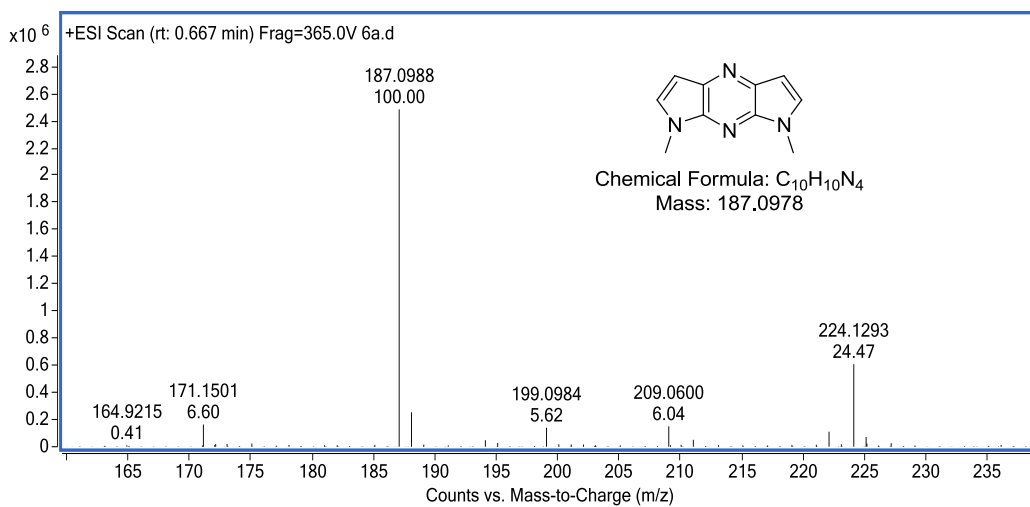

### HR/MS – 6a

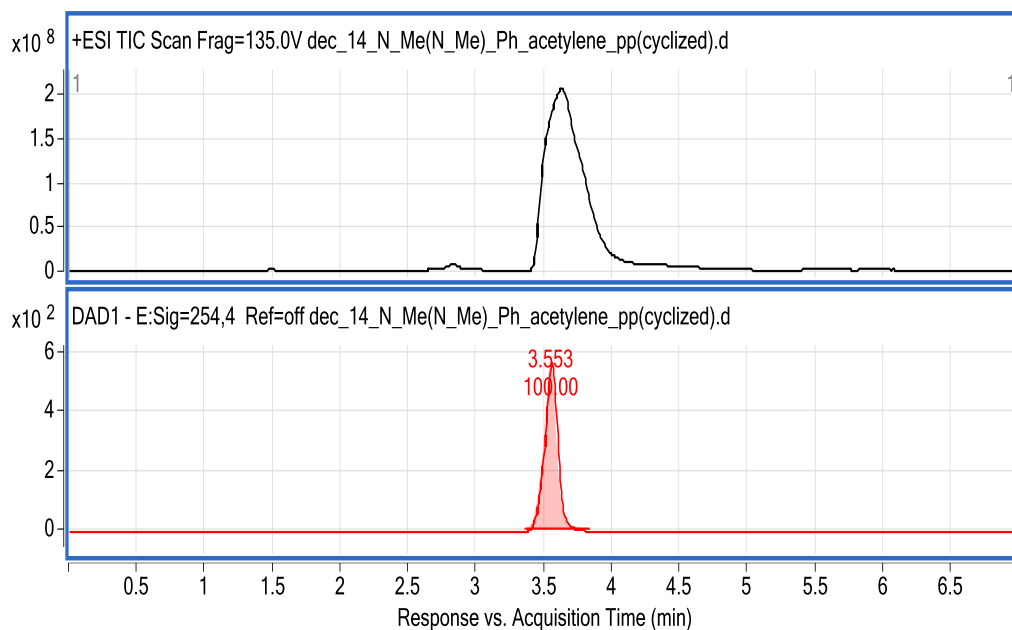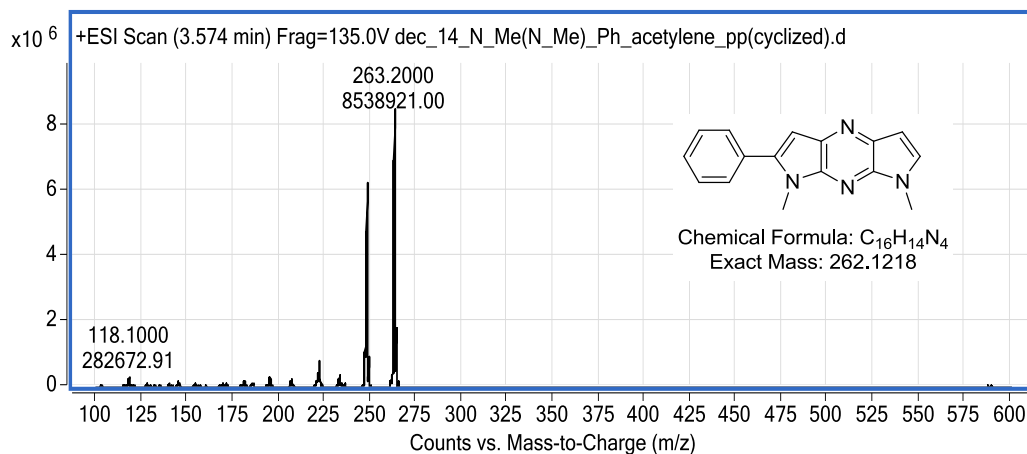

### LC/MS – 6b

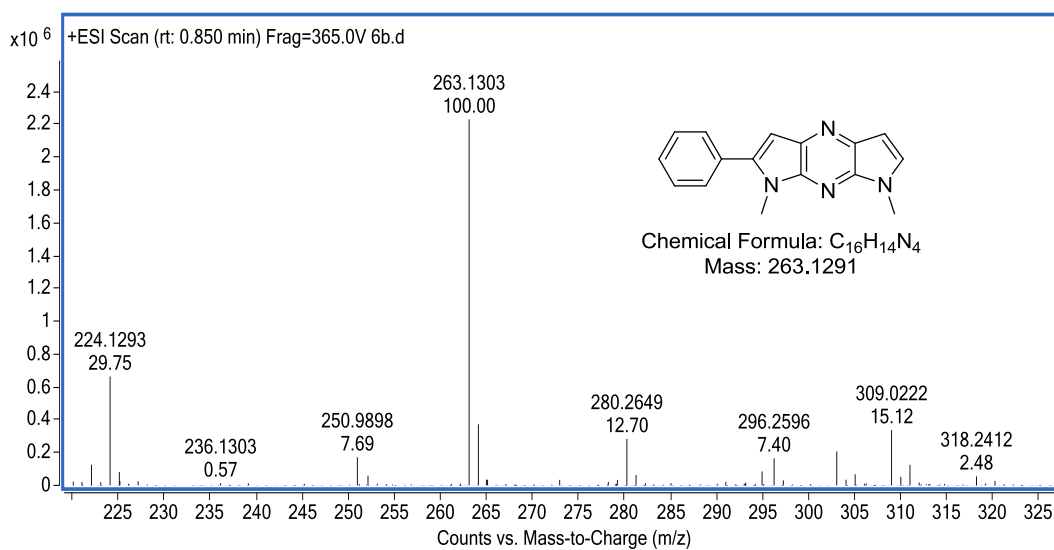

### HR/MS – 6b

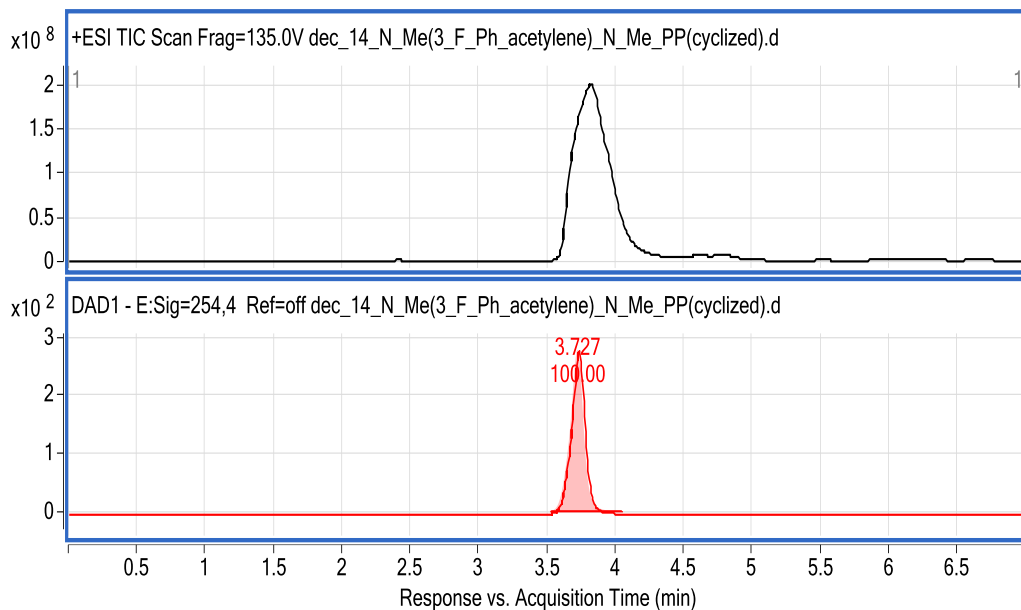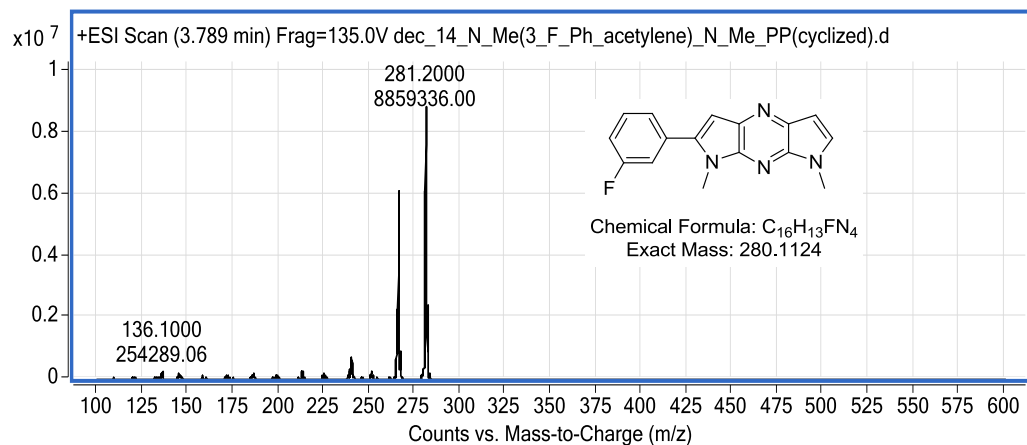

### LC/MS – 6c

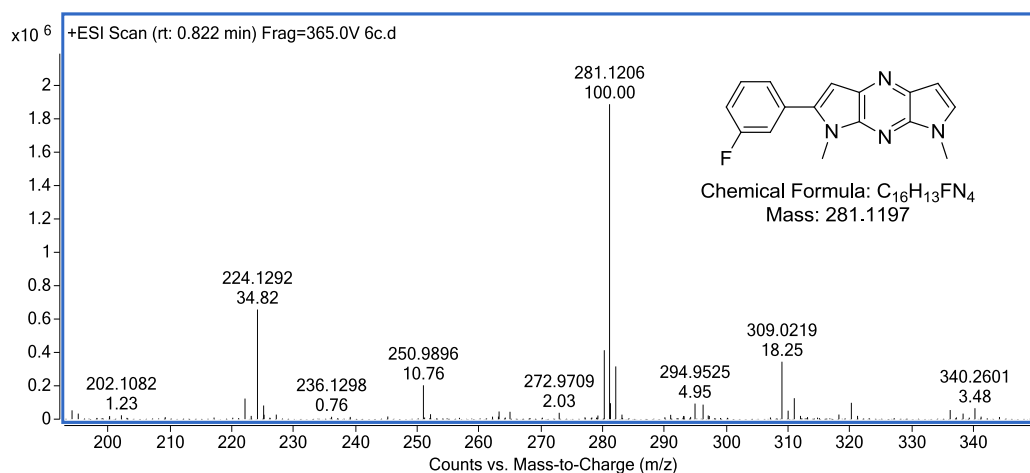

### HR/MS – 6c



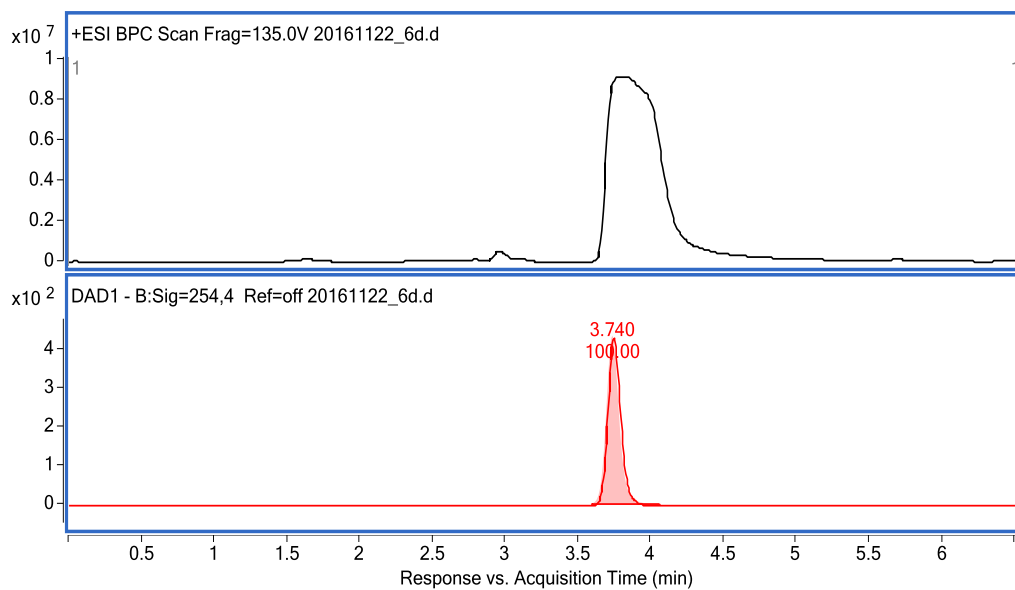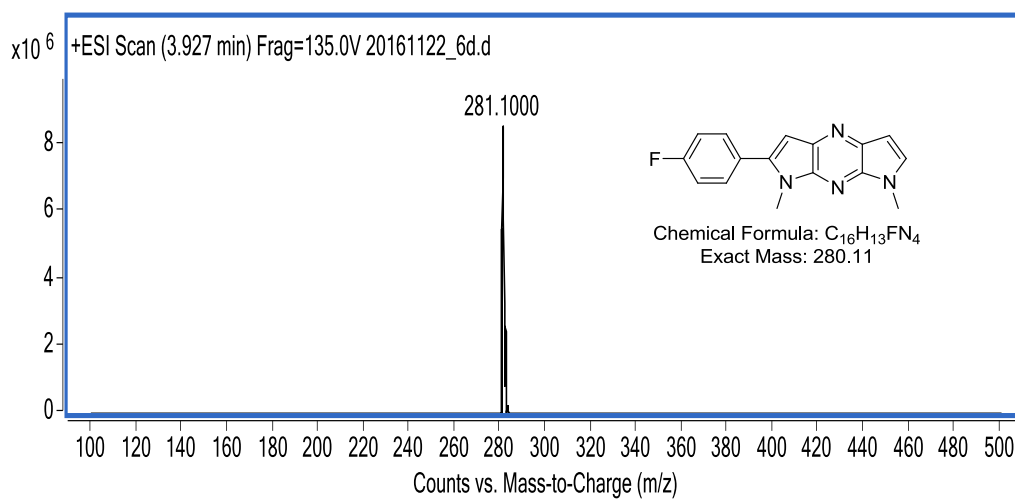

### LC/MS – 6d

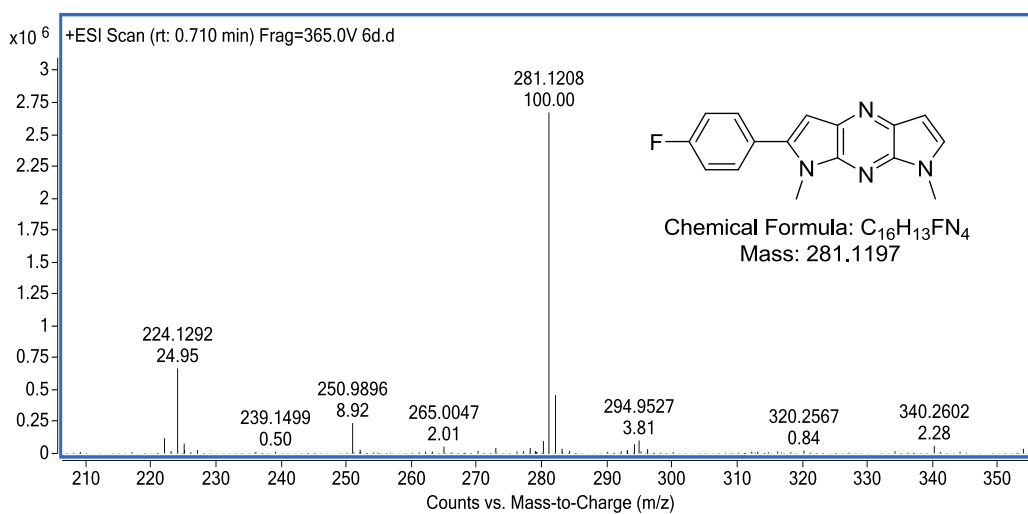

### HR/MS – 6d

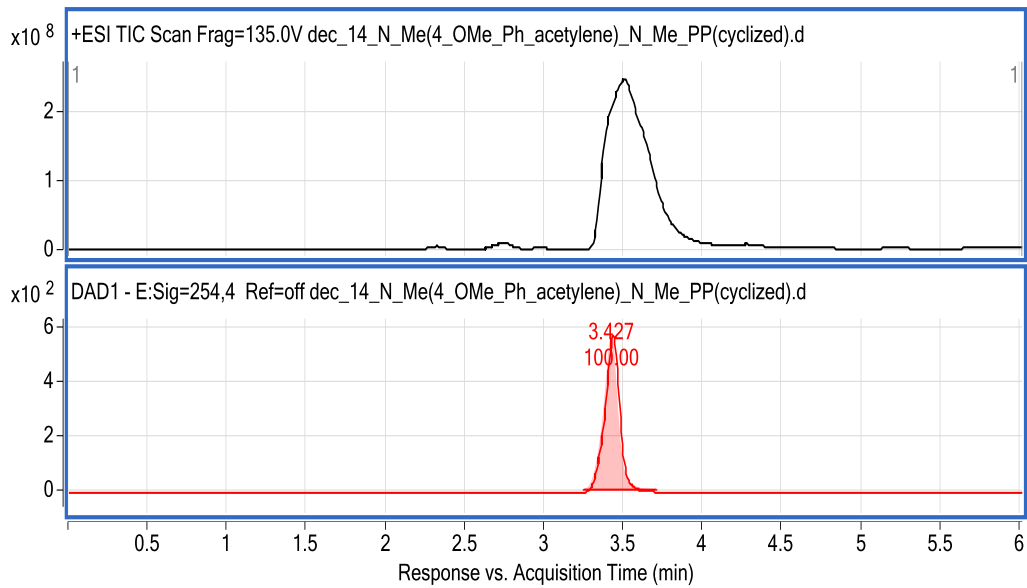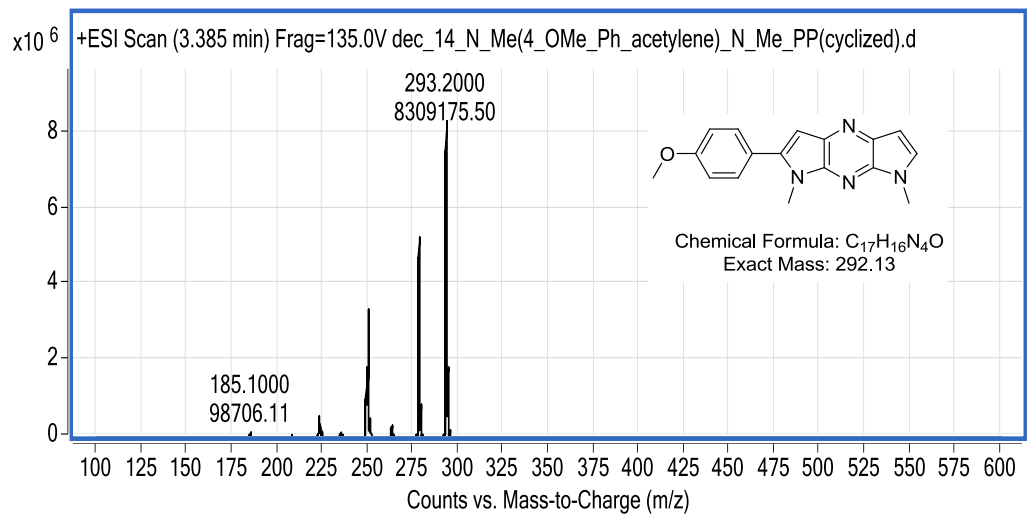

### LC/MS – 6e

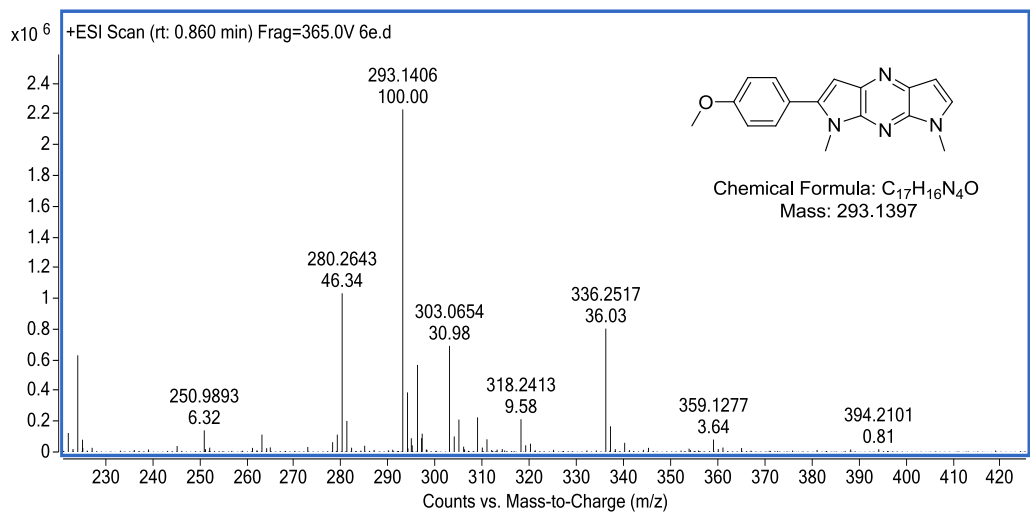

### HR/MS – 6e

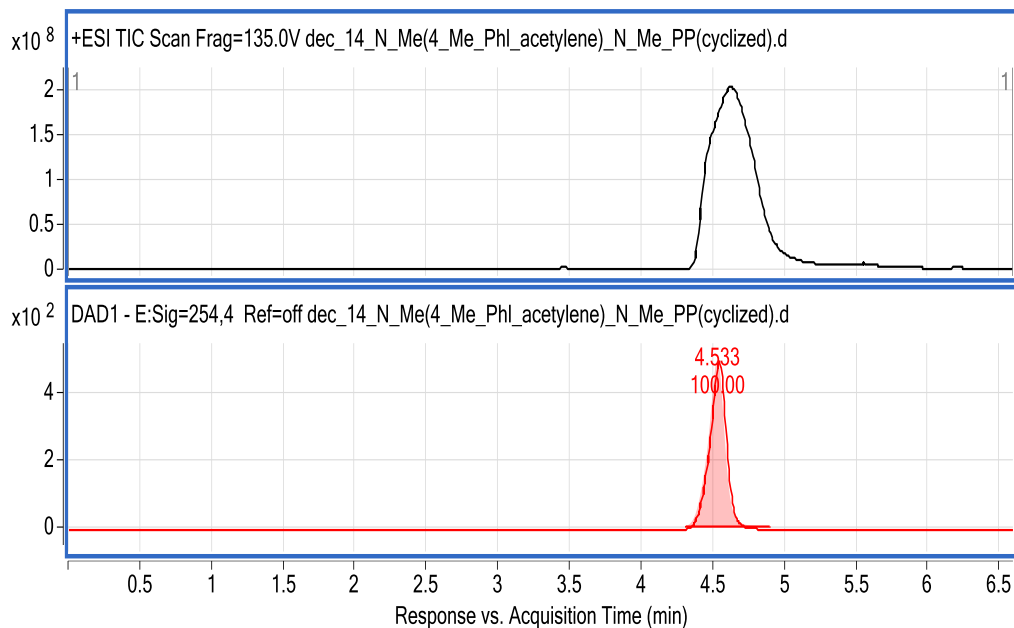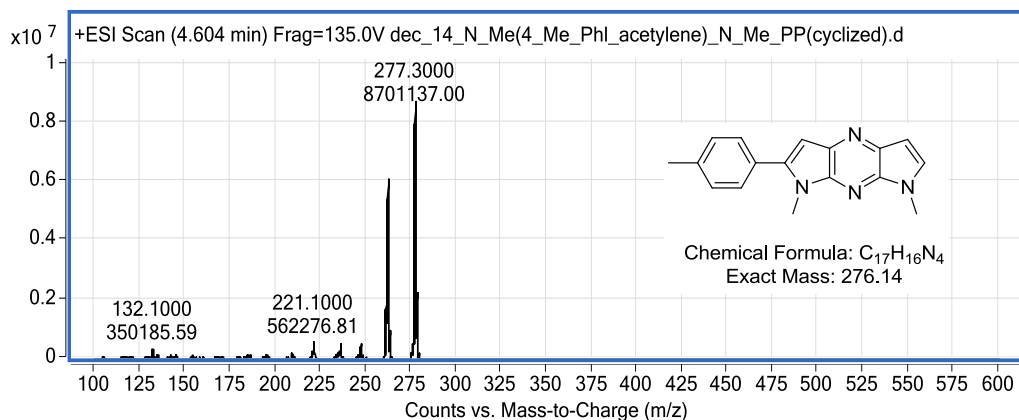

### LC/MS – 6f

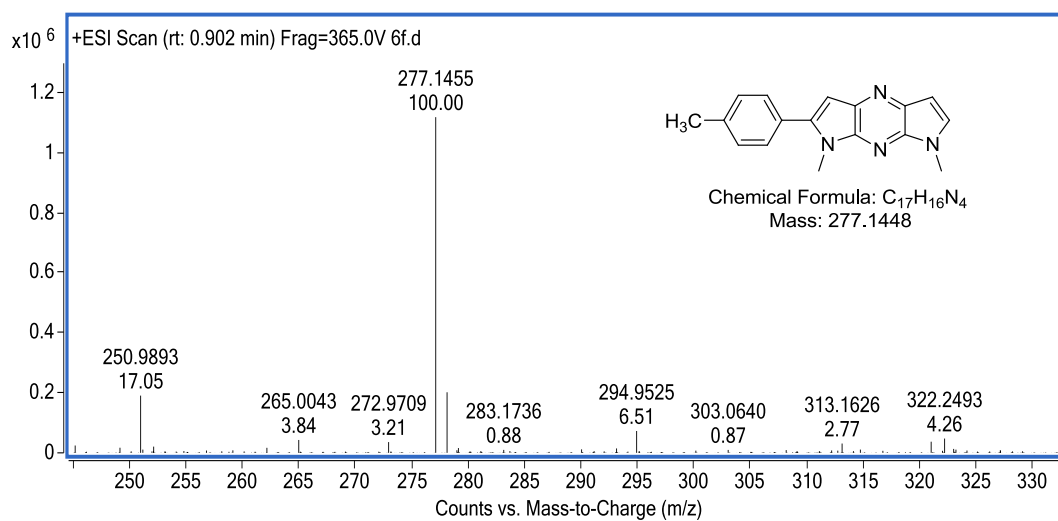

### HR/MS – 6f

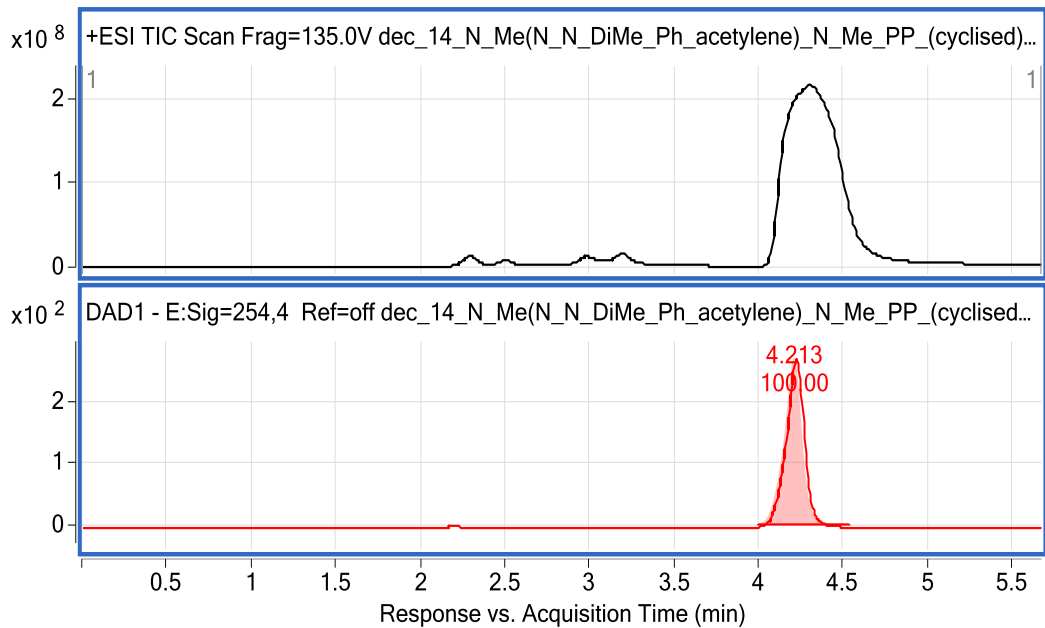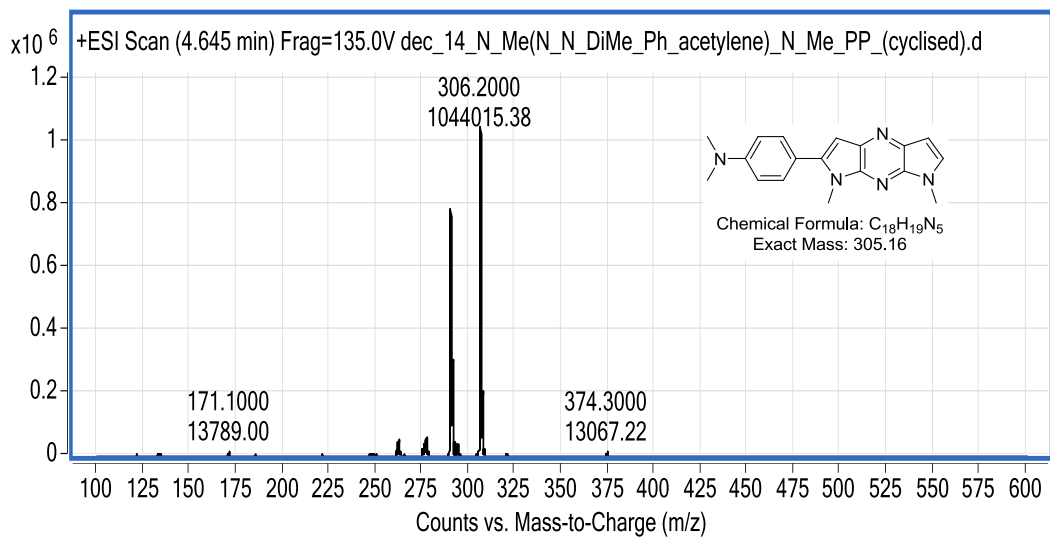

### LC/MS – 6g

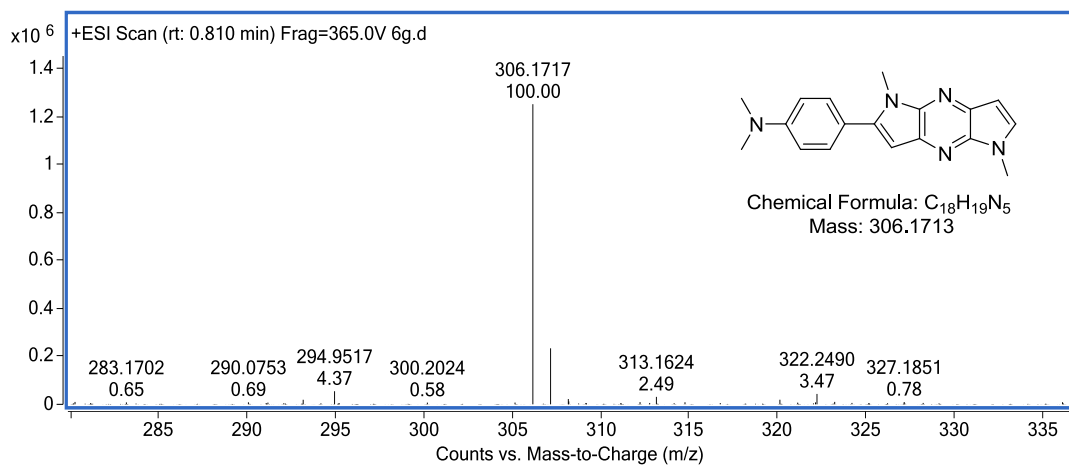

### HR/MS – 6g

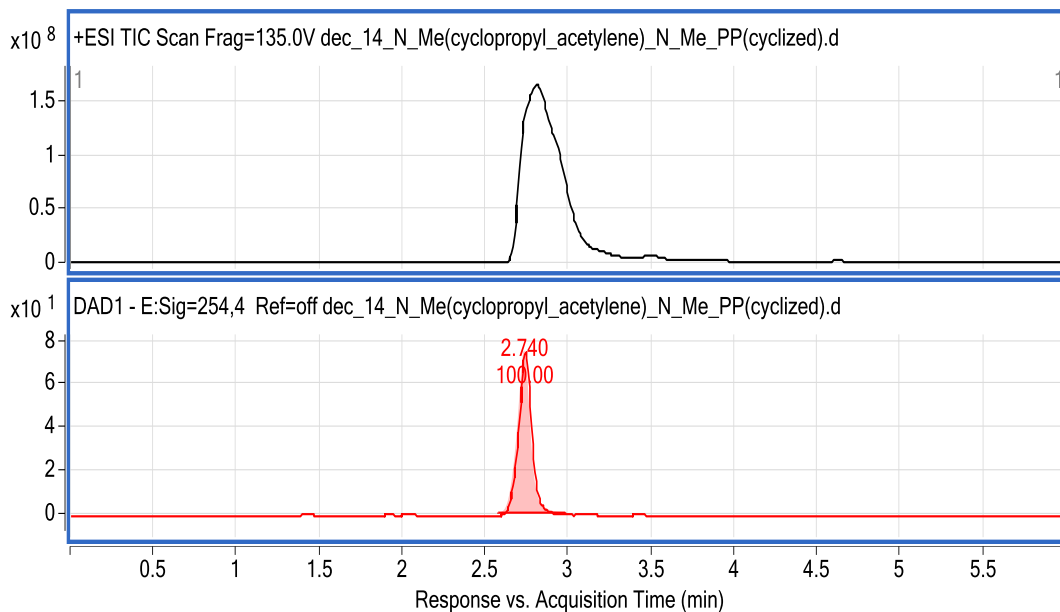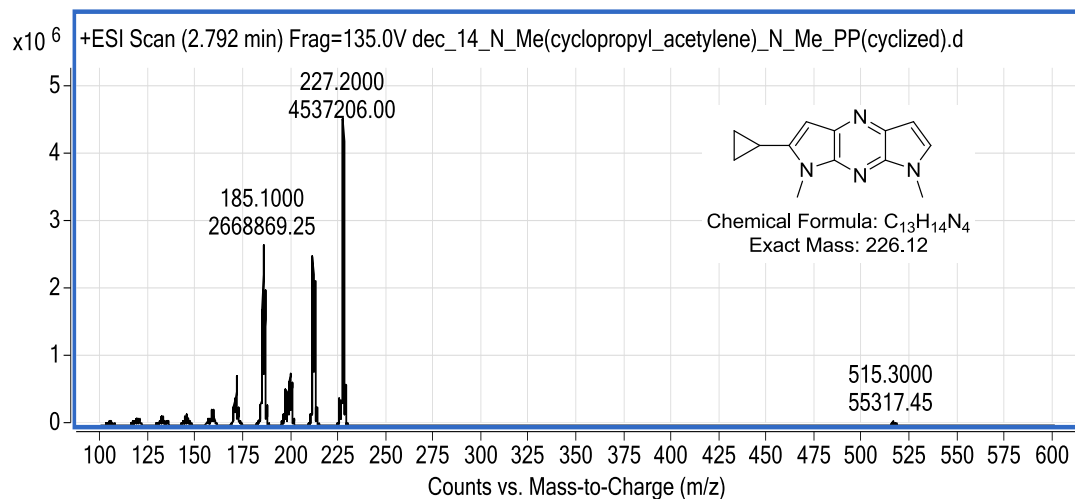

### LC/MS – 6h

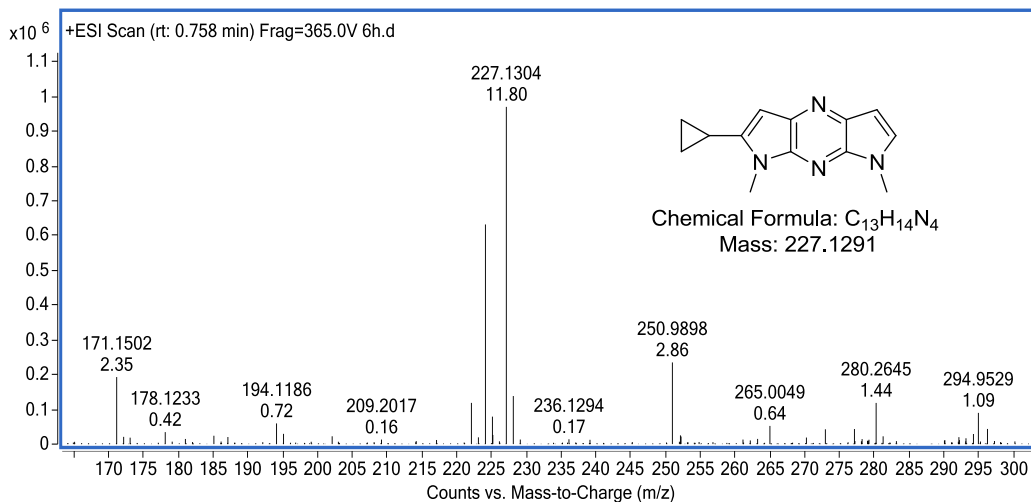

### HR/MS – 6h

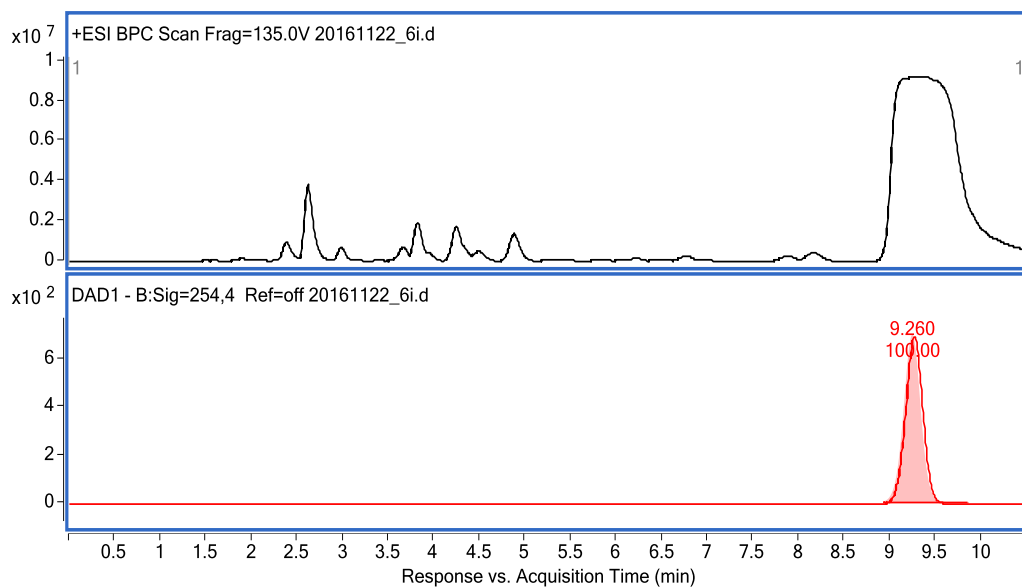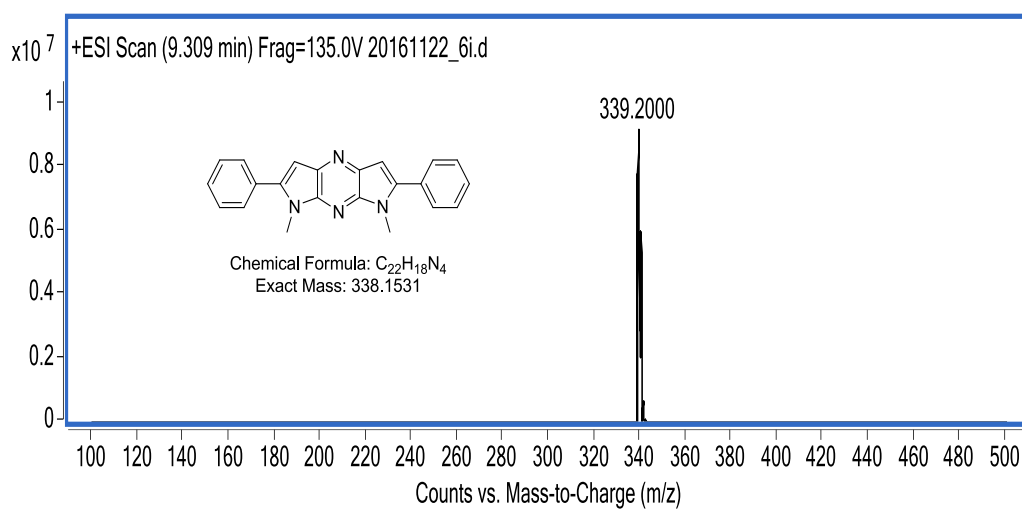

### LC/MS – 6i

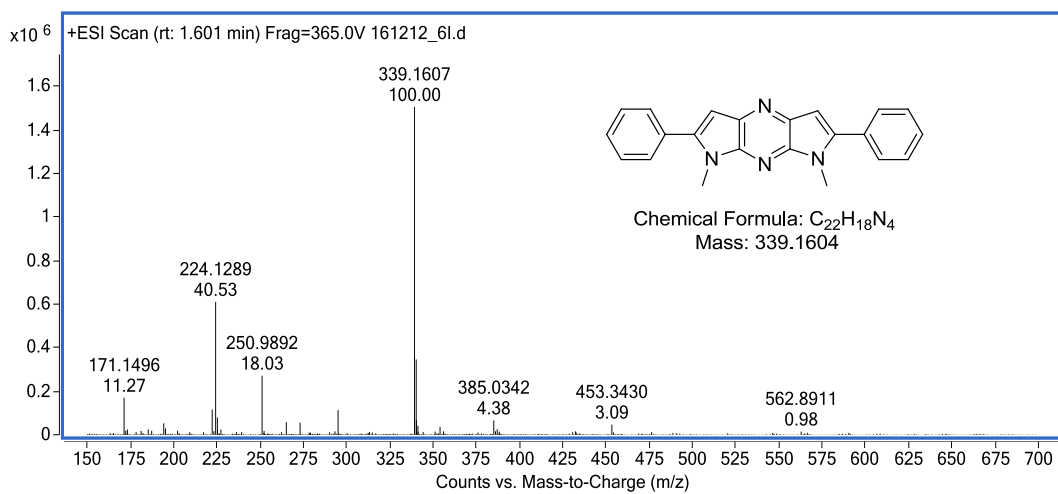

### HR/MS – 6i

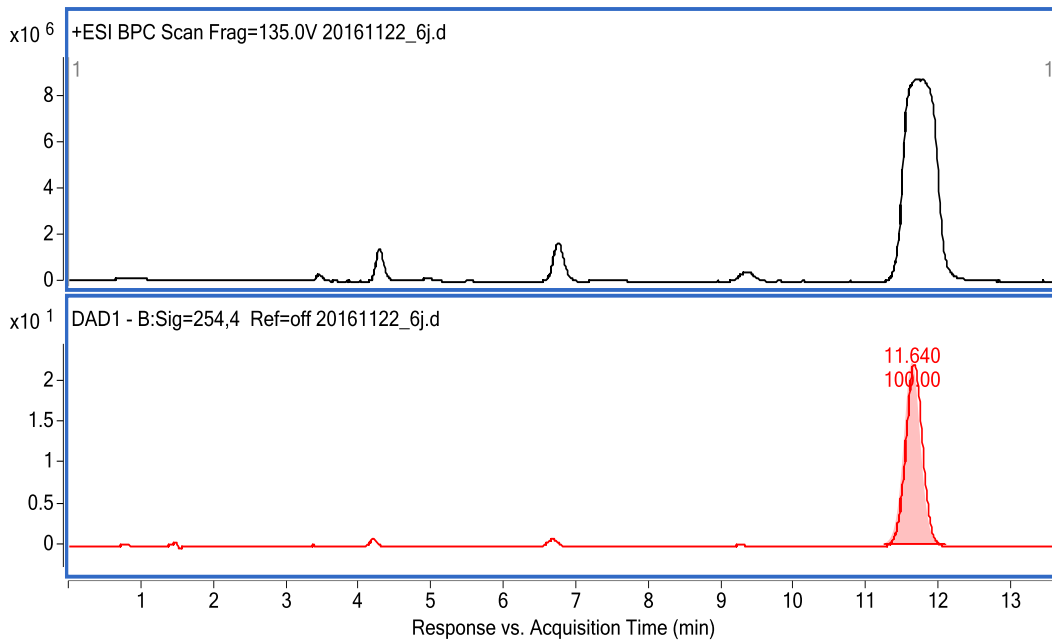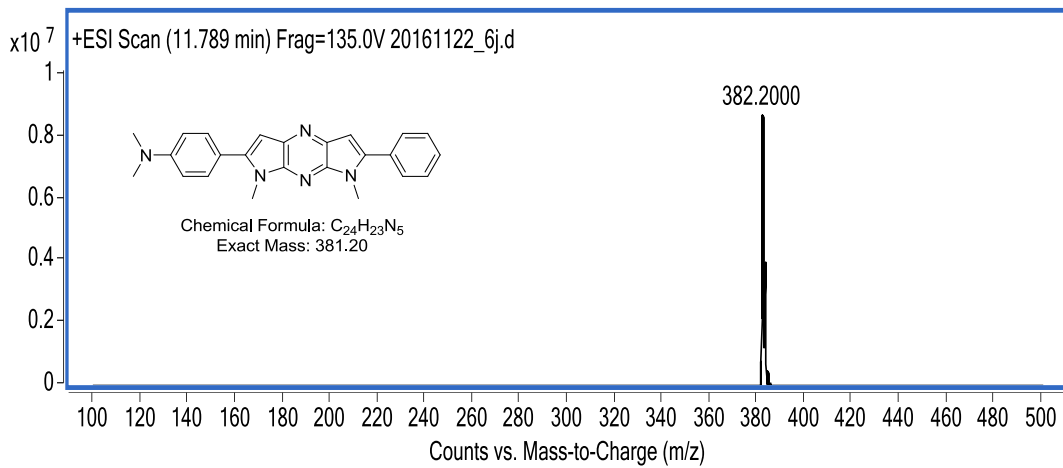

### LC/MS – 6j

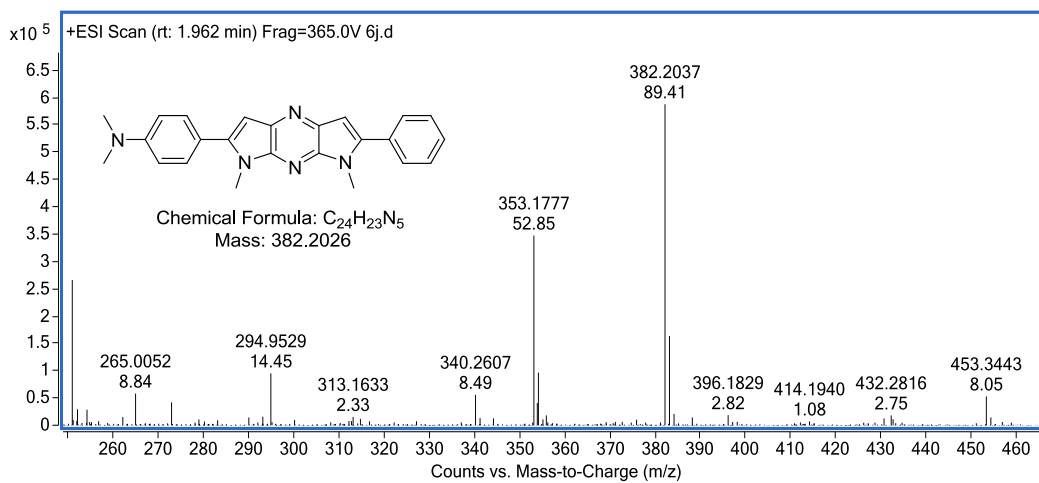

### HR/MS – 6j

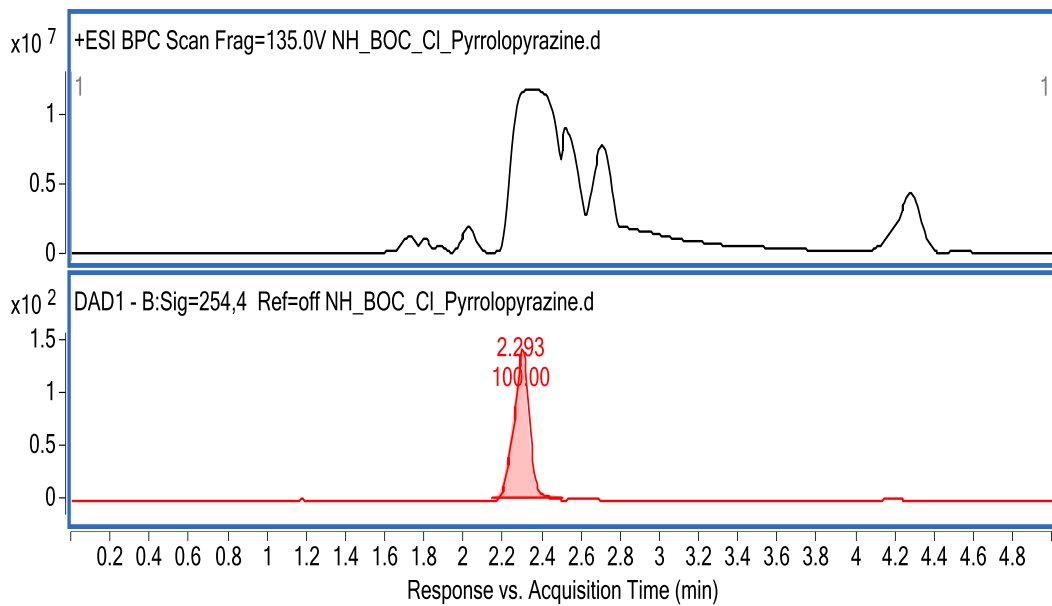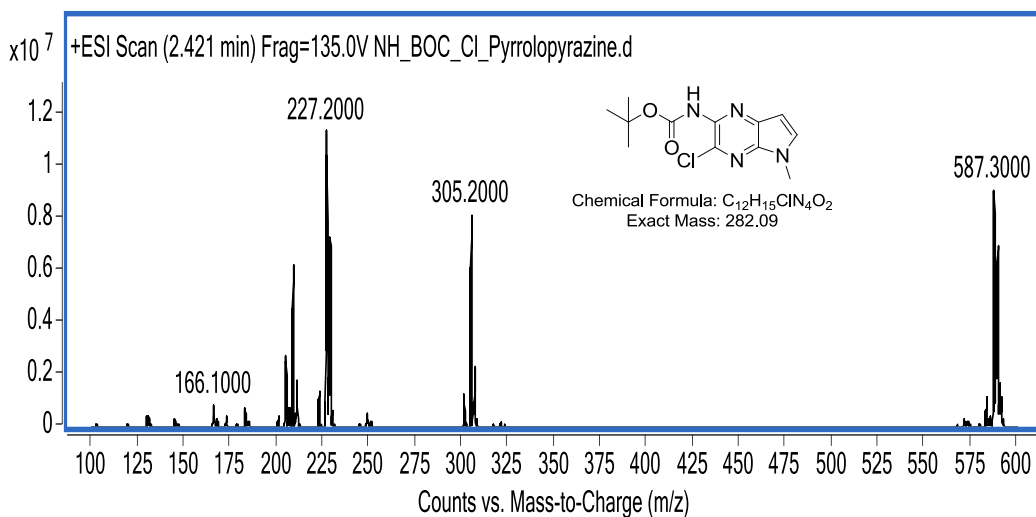

**LC/MS – 7a**

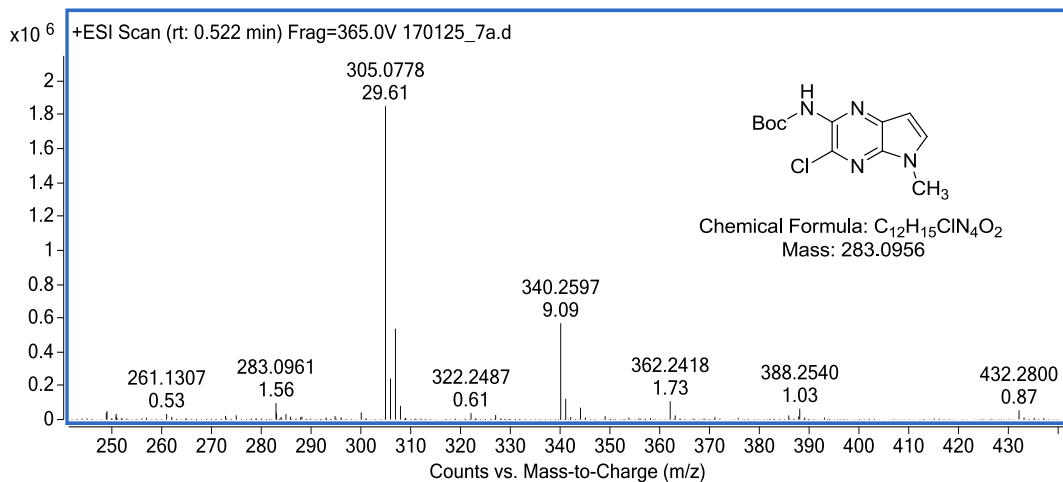

**HR/MS – 7a**



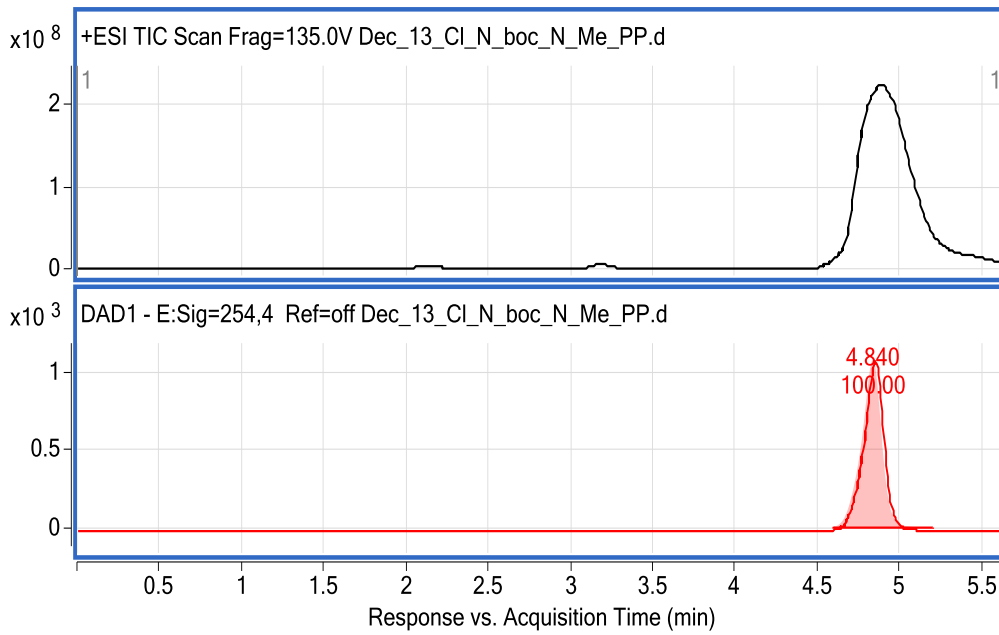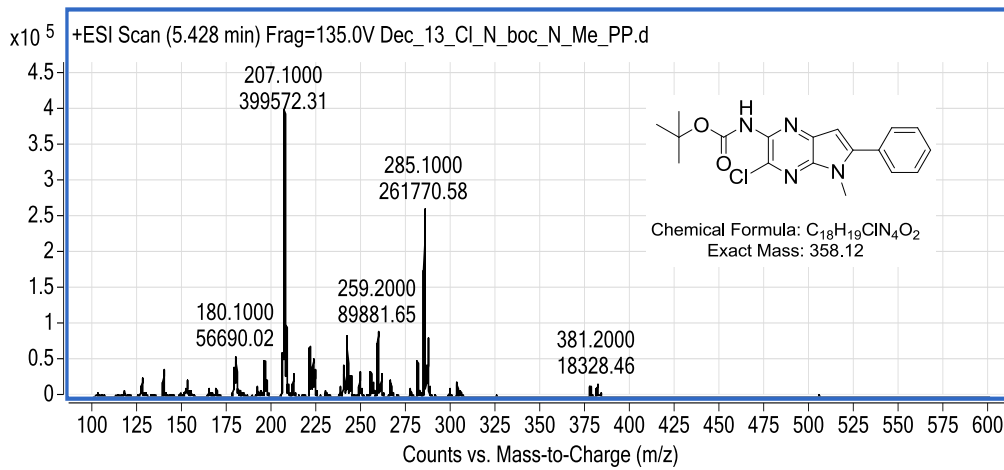

### LC/MS – 7b

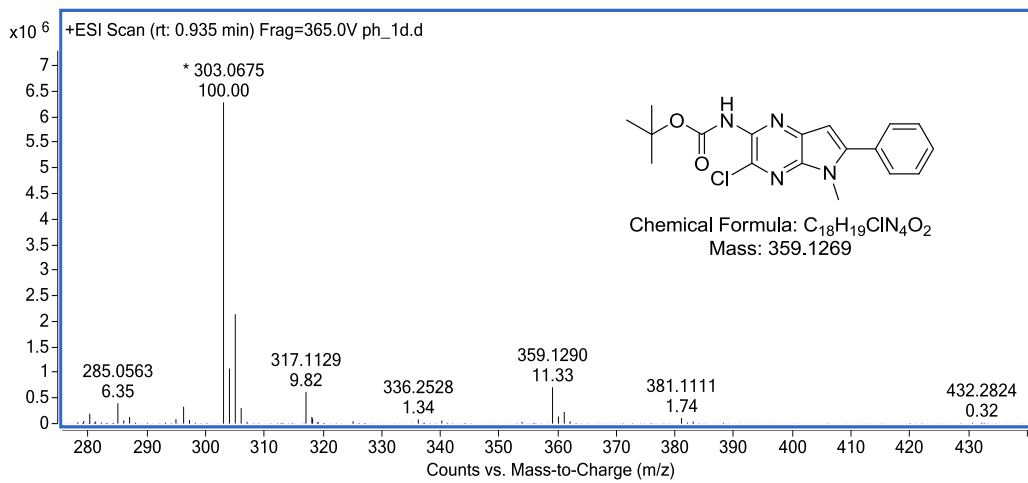

### HR/MS – 7b

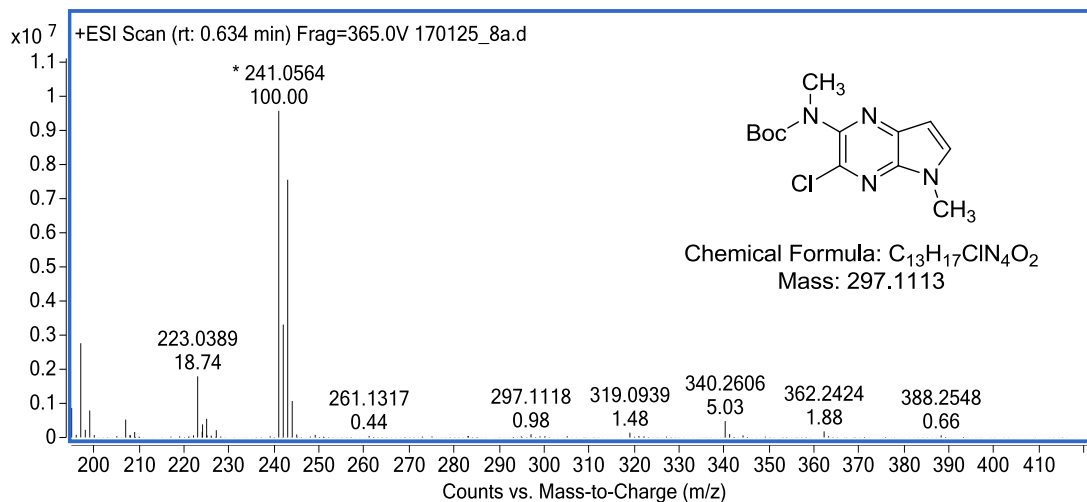

**HR/MS – 8a**

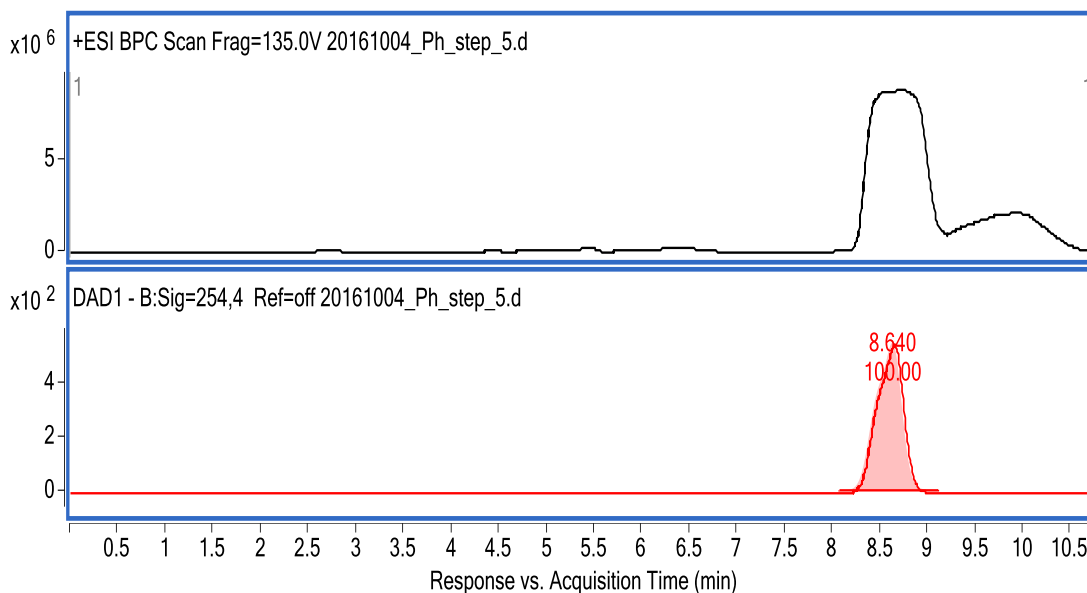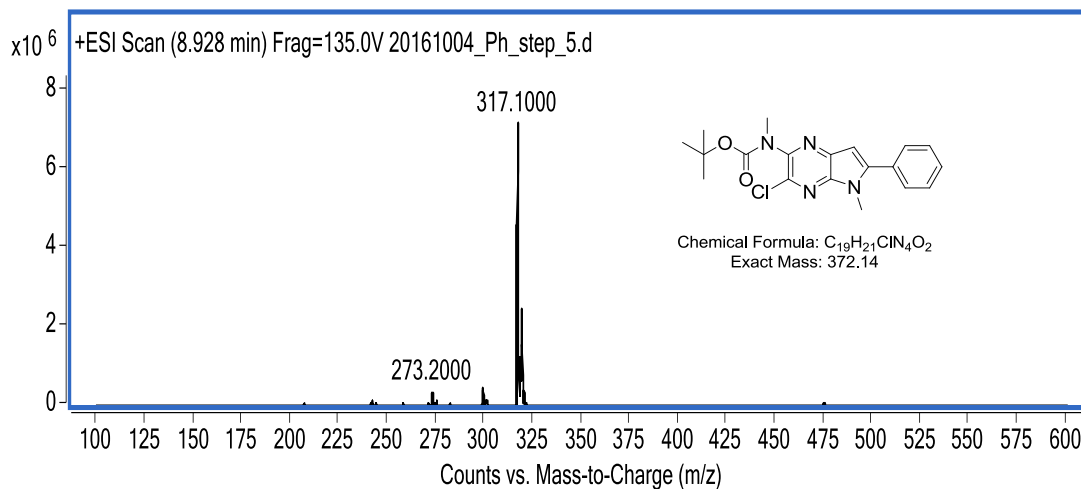

**LC/MS – 8b**

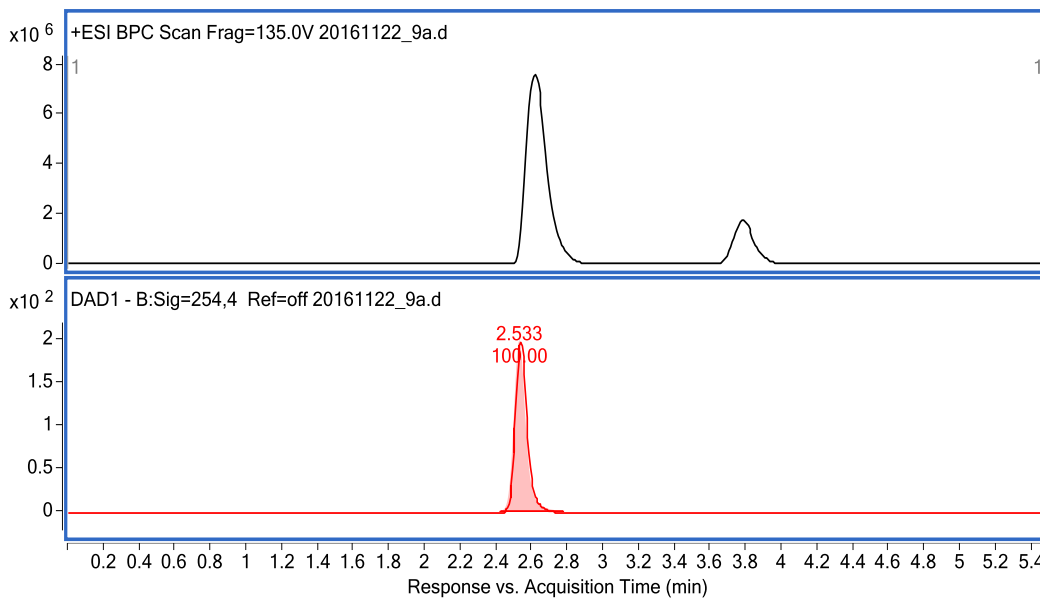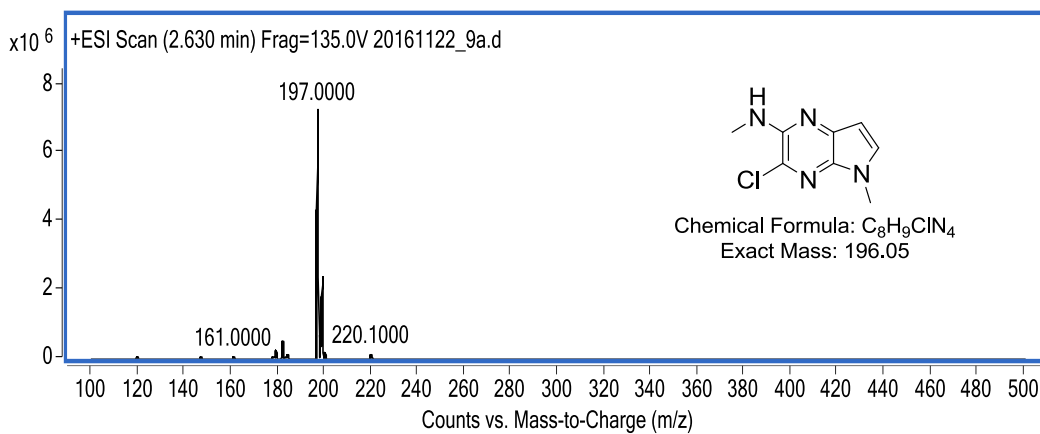

### LC/MS – 9a

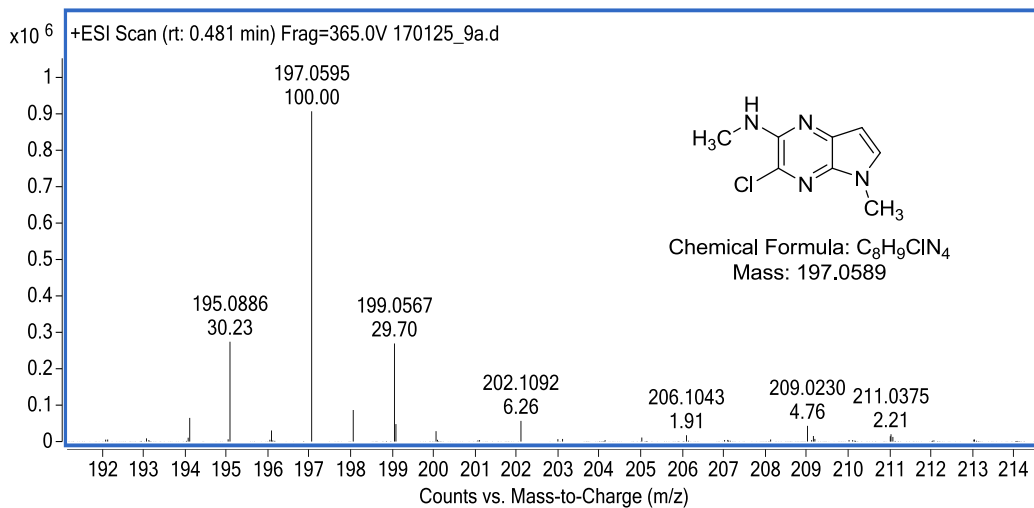

### HR/MS – 9a

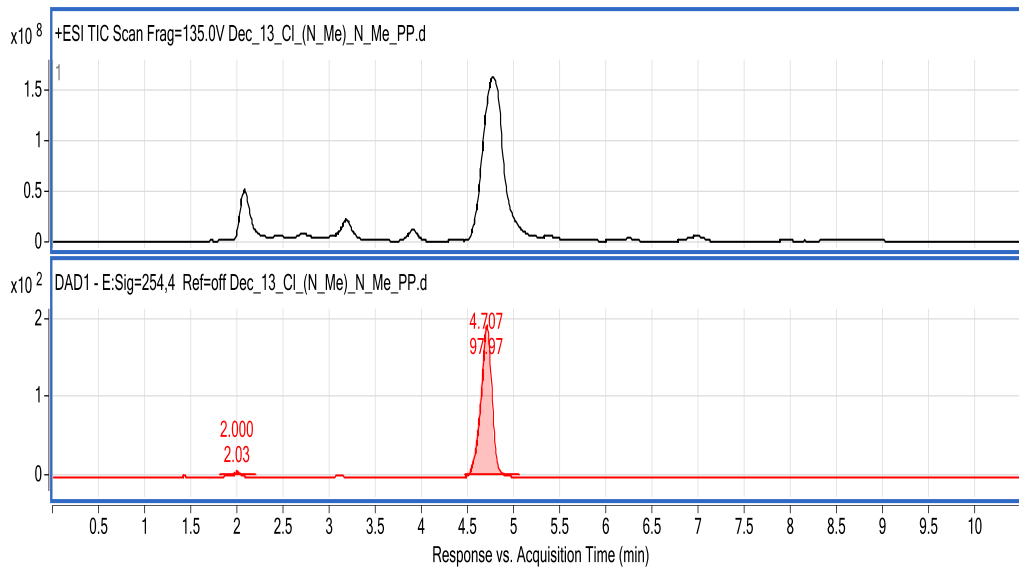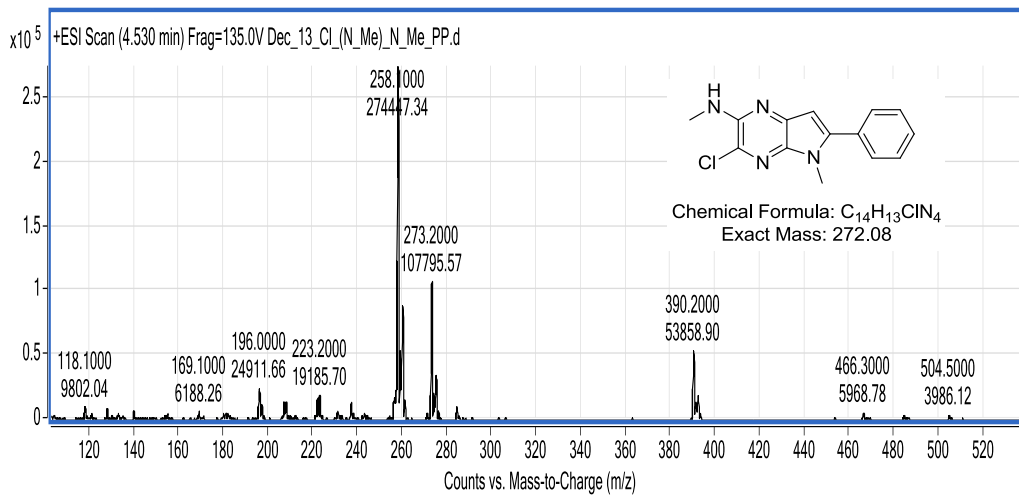

**LC/MS – 9b**

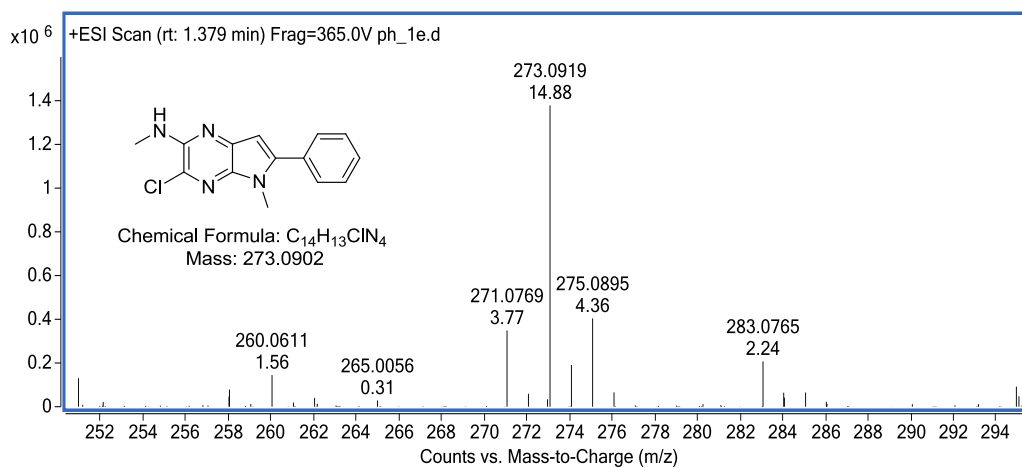

**HR/MS – 9b**

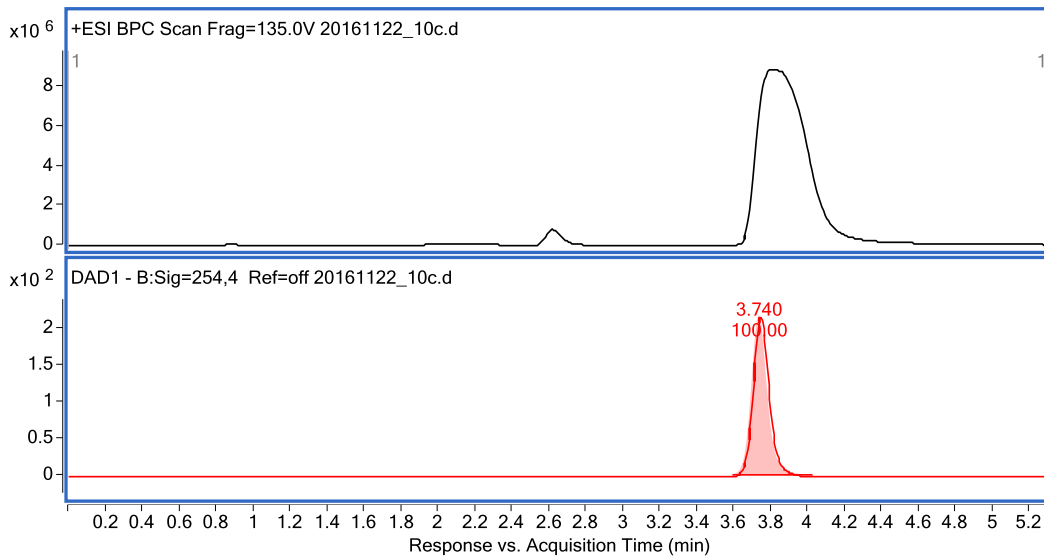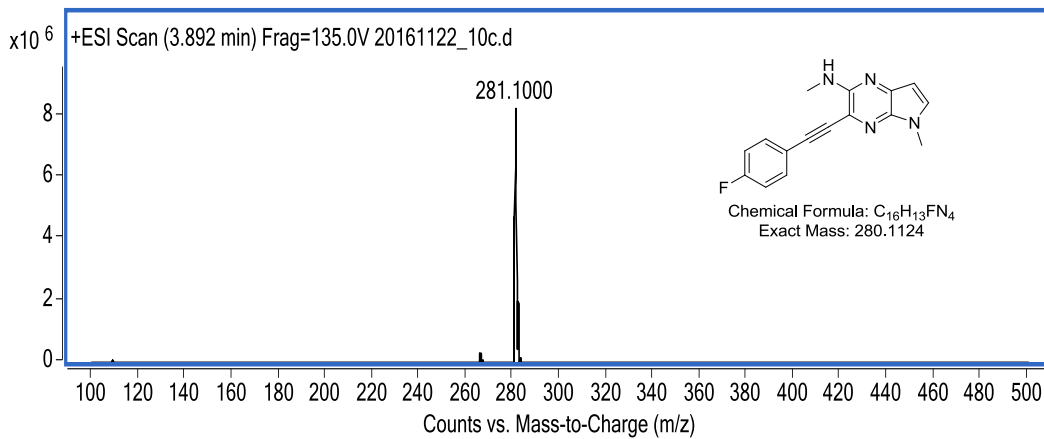

### LC/MS – 10c

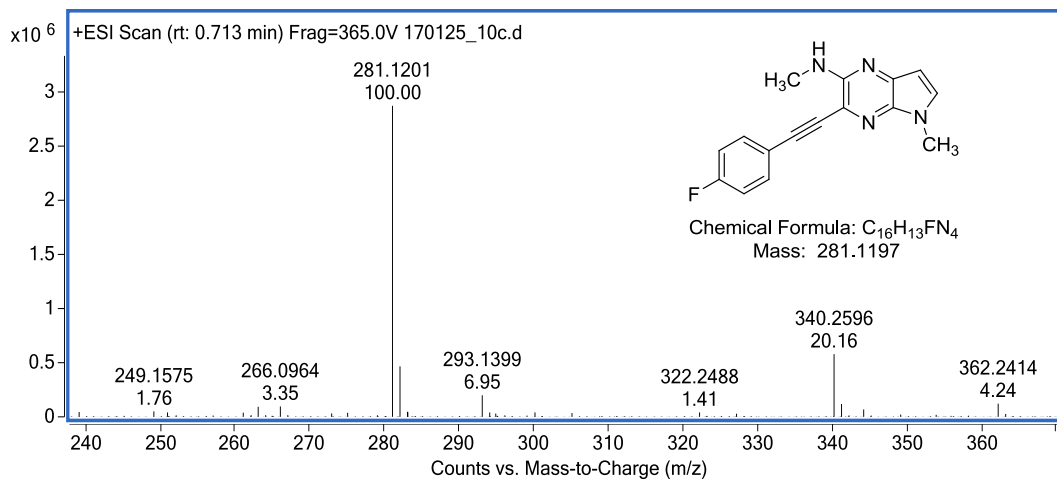

### HR/MS – 10c

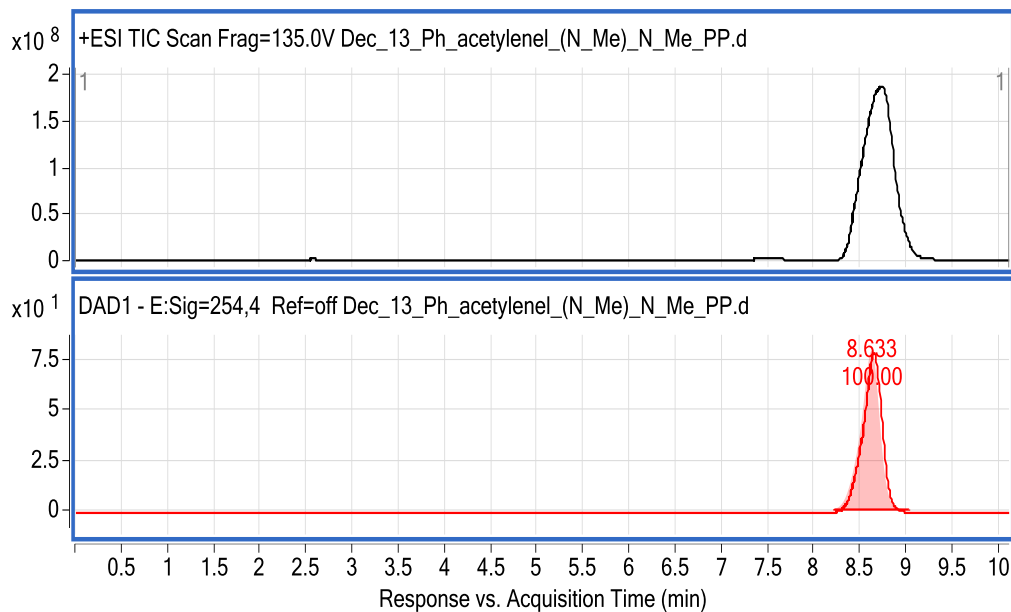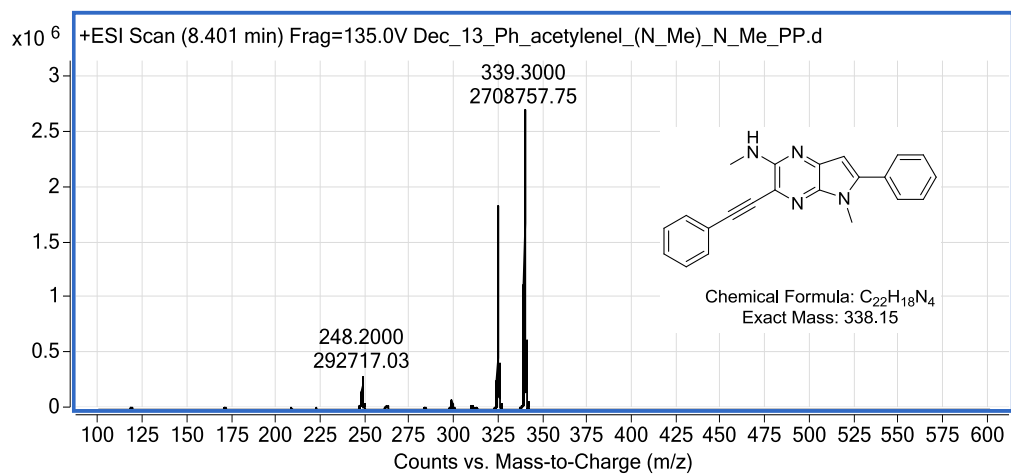

### LC/MS – 10f

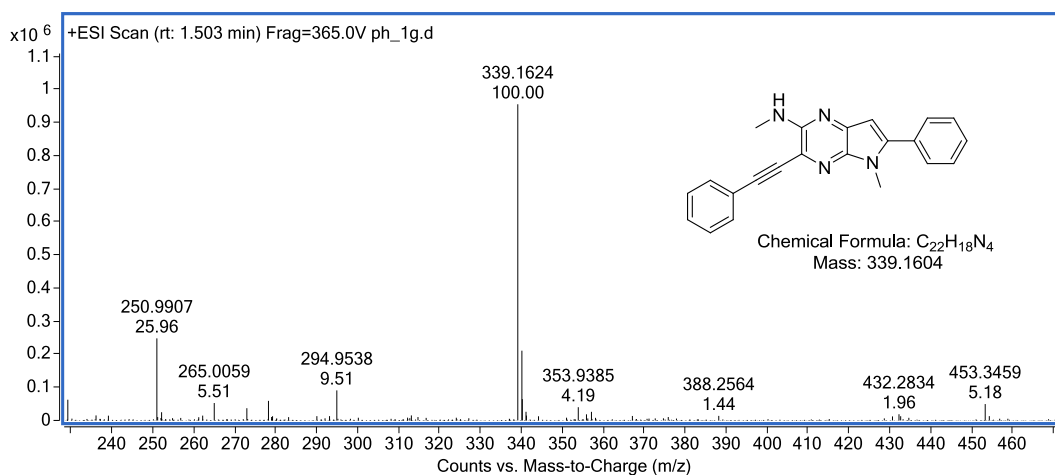

### HR/MS – 10f

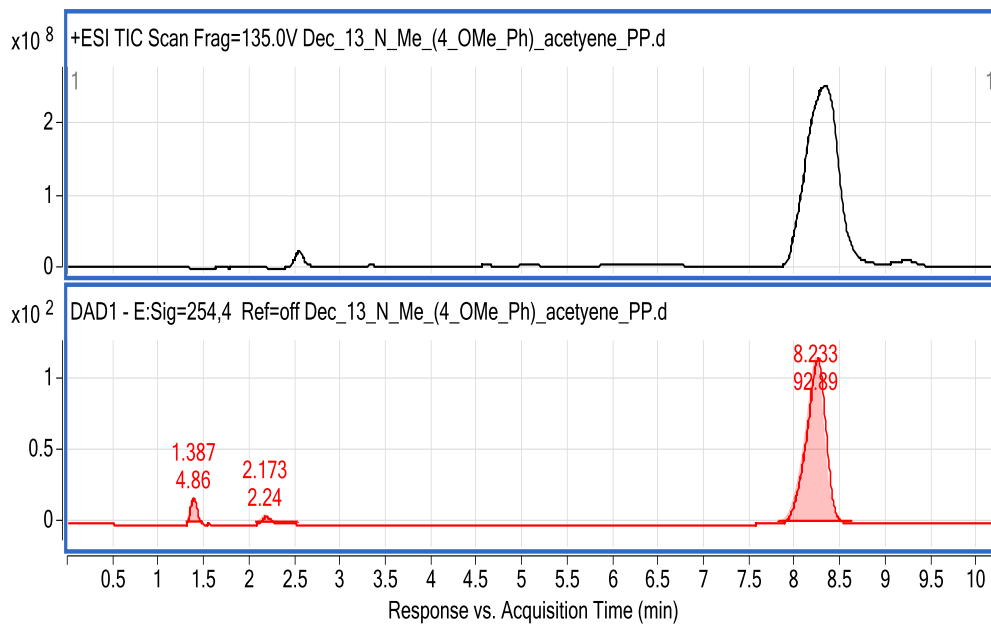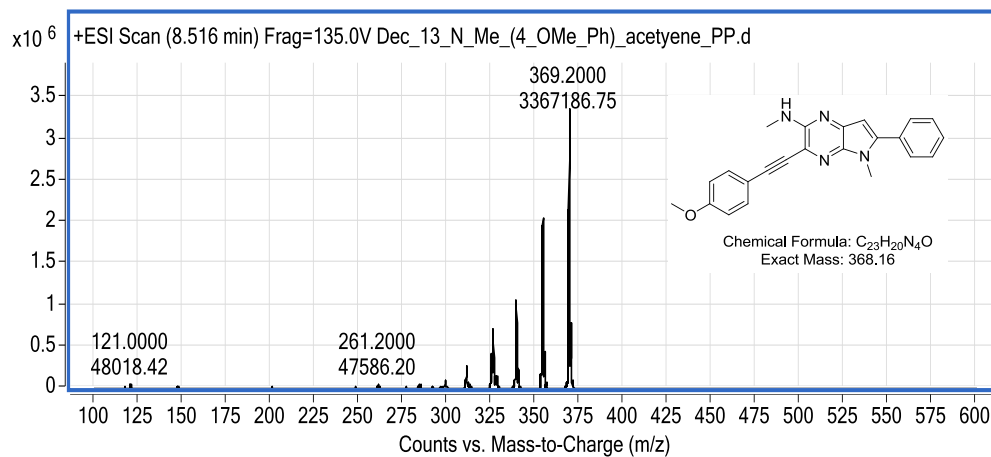

### LC/MS – 10g

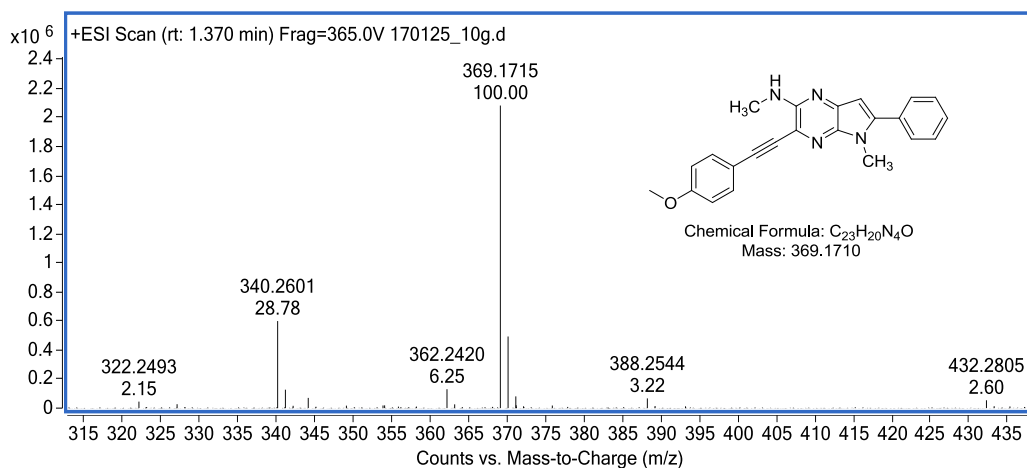

### HR/MS – 10g

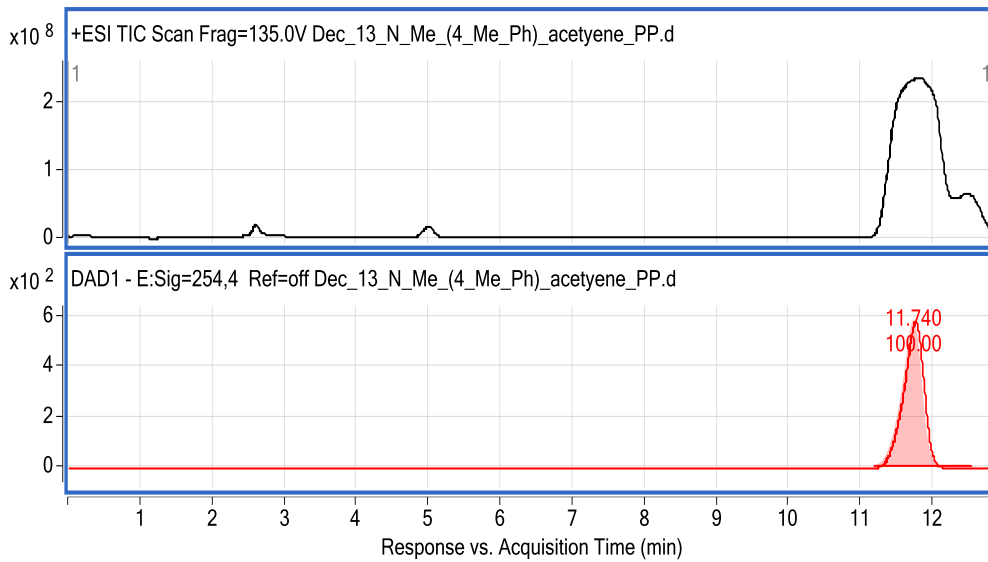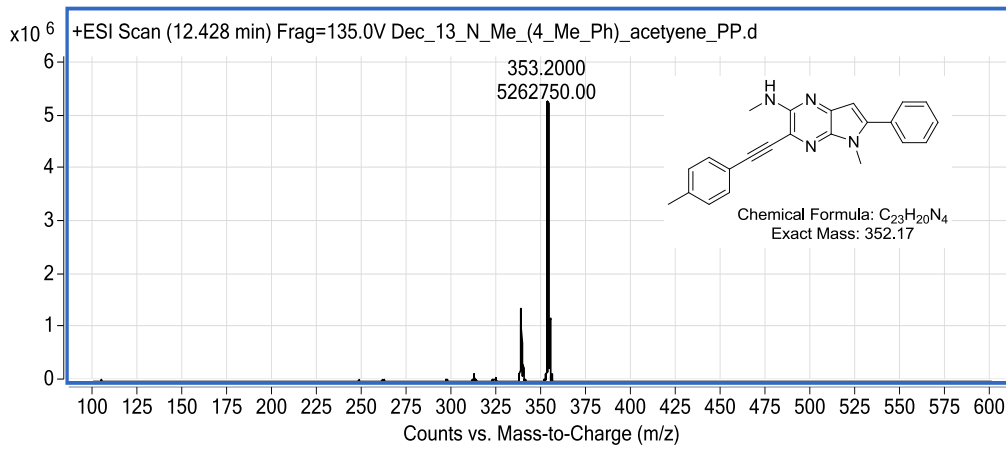

### LC/MS – 10h

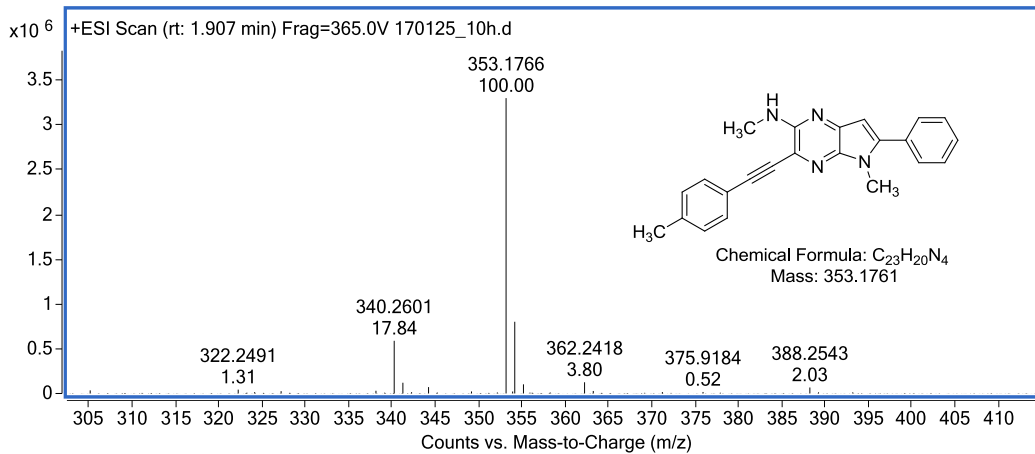

### HR/MS – 10h



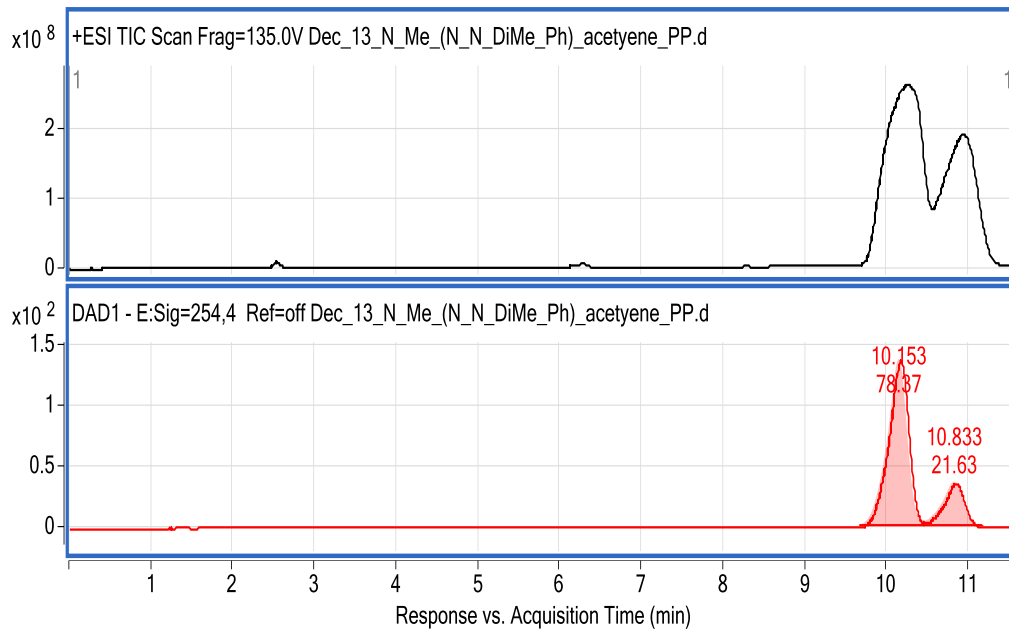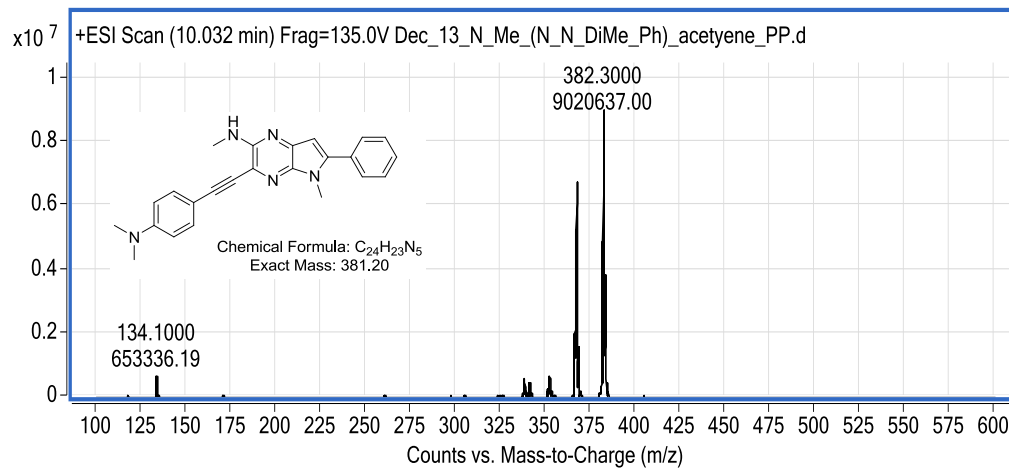

**LC/MS – 10i**

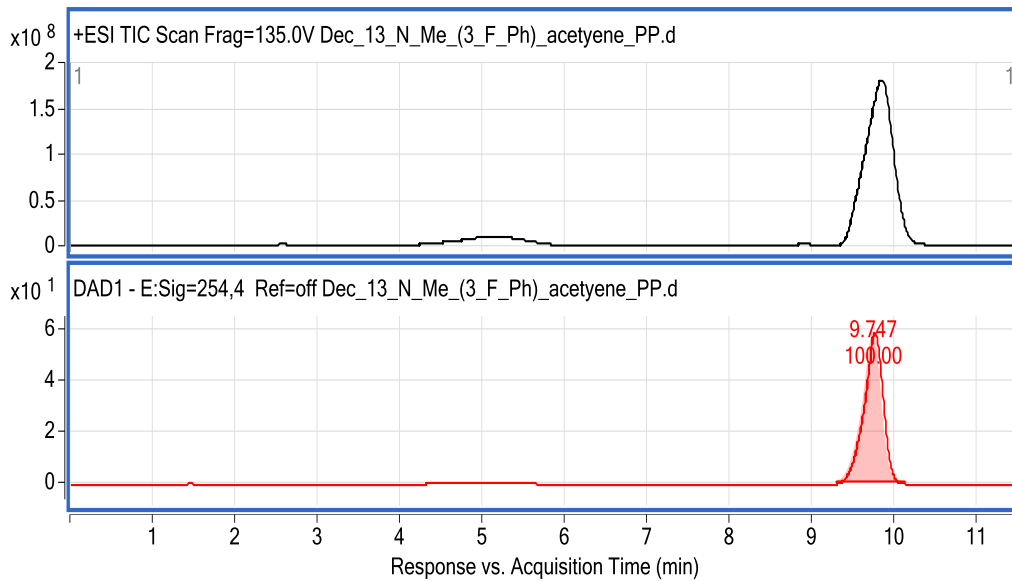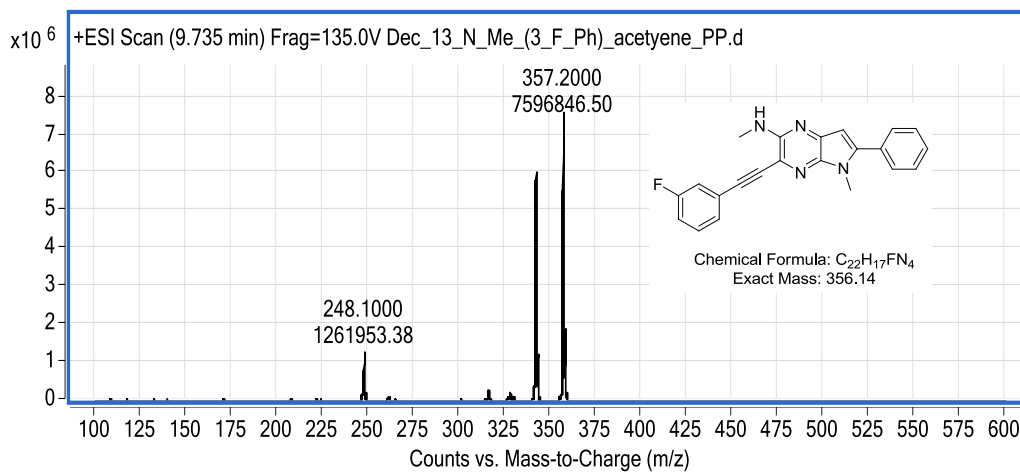

### LC/MS – 10j

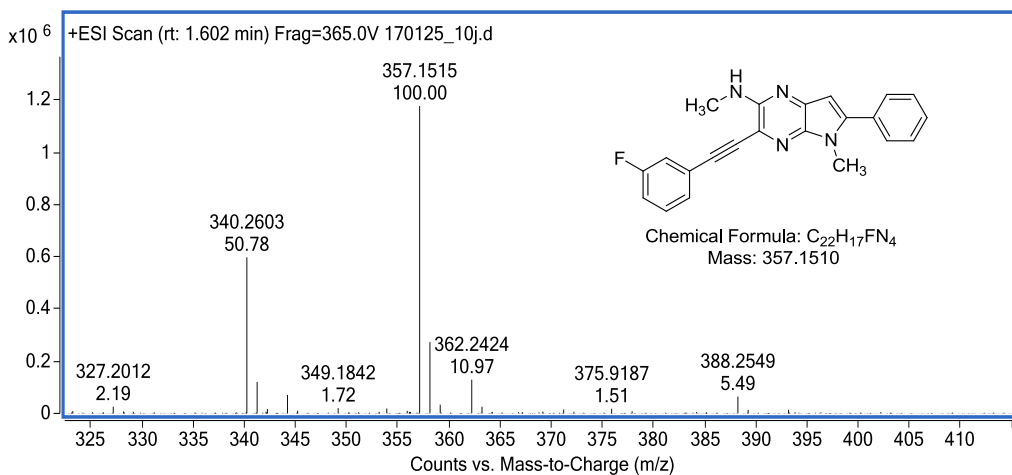

### HR/MS – 10j

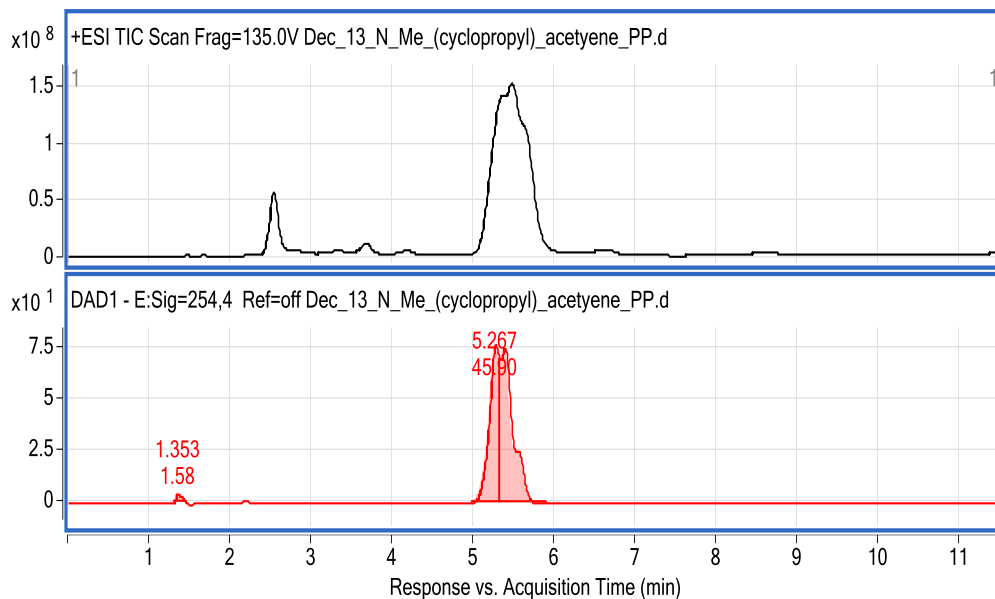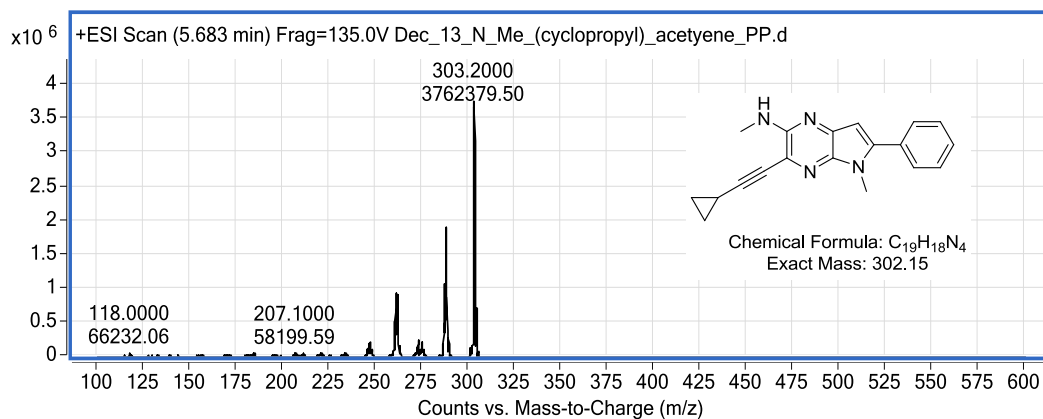

### LC/MS – 10k

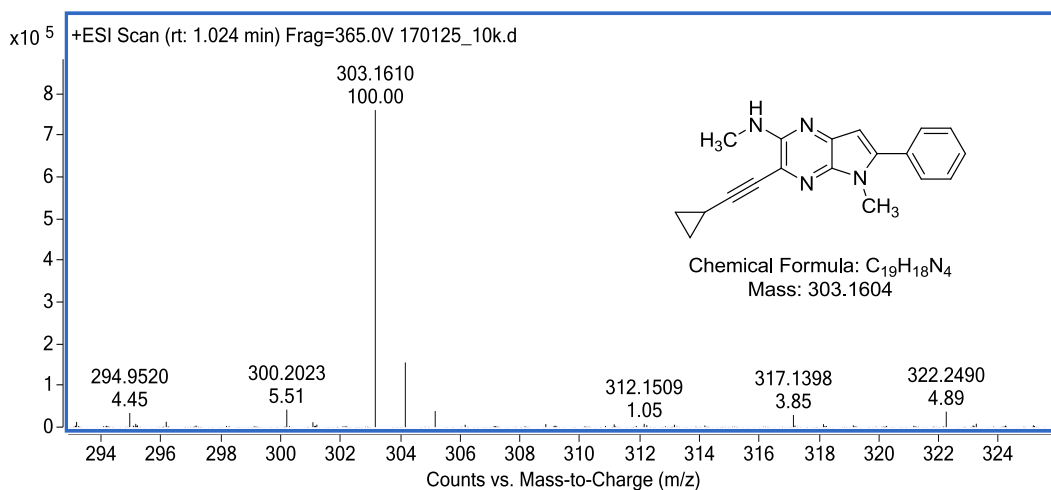

### HR/MS – 10k

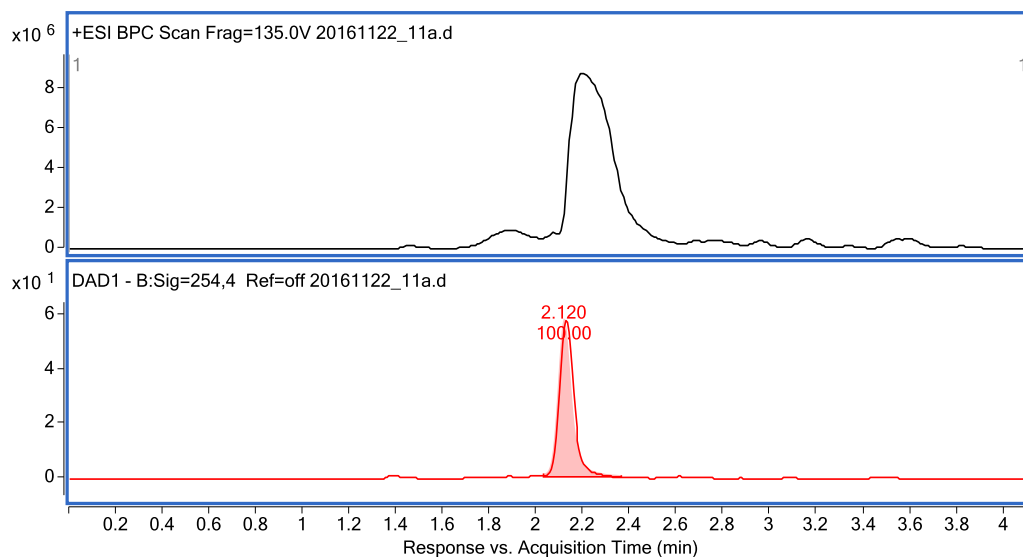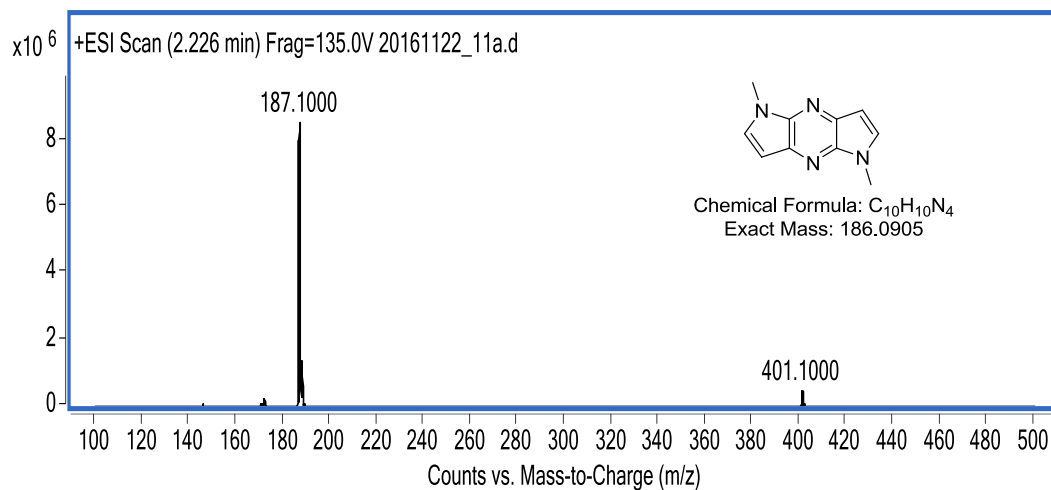

### LC/MS – 11a

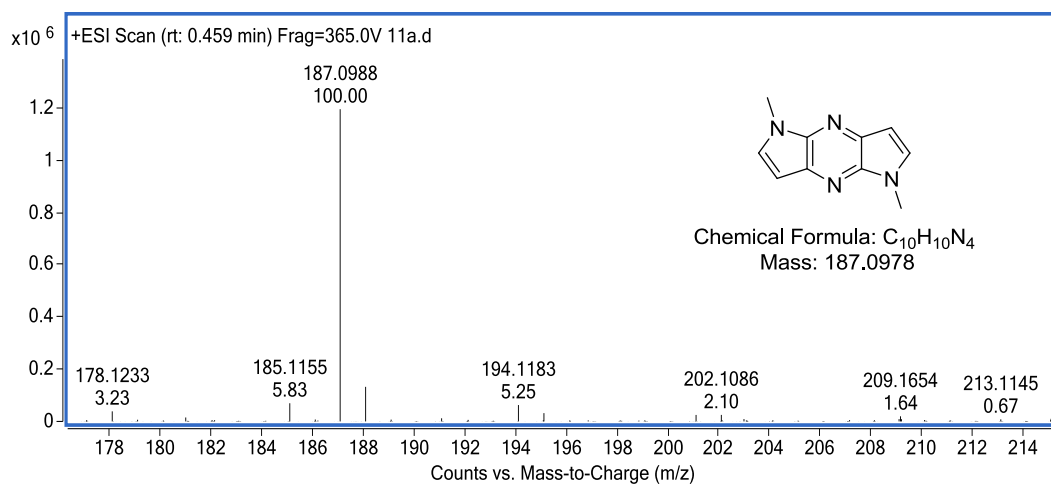

### HR/MS – 11a

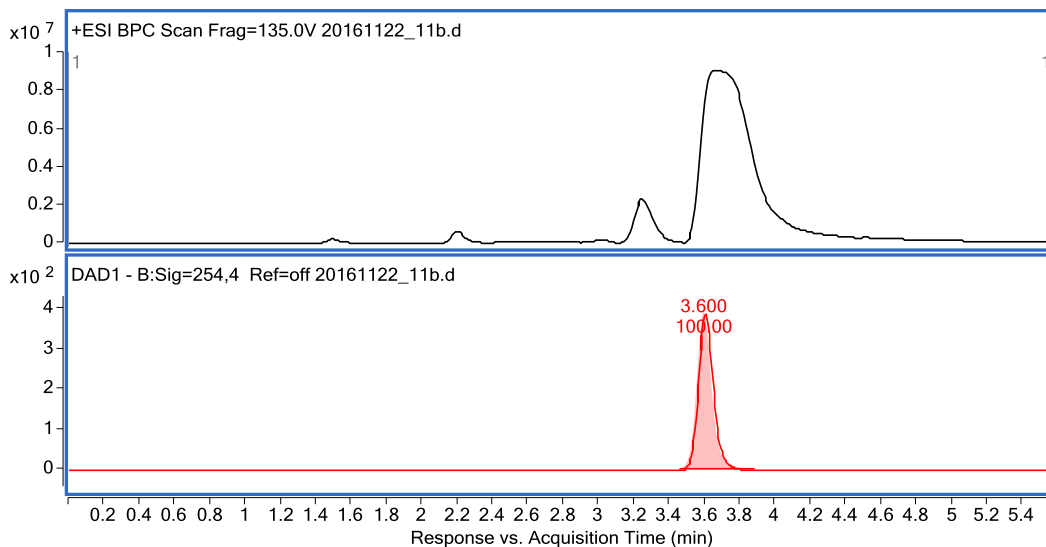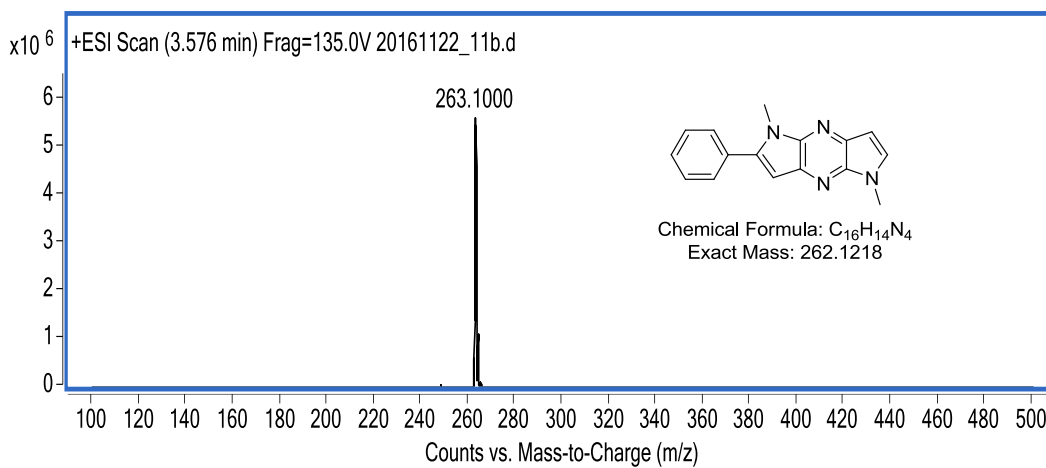

**LC/MS – 11b**

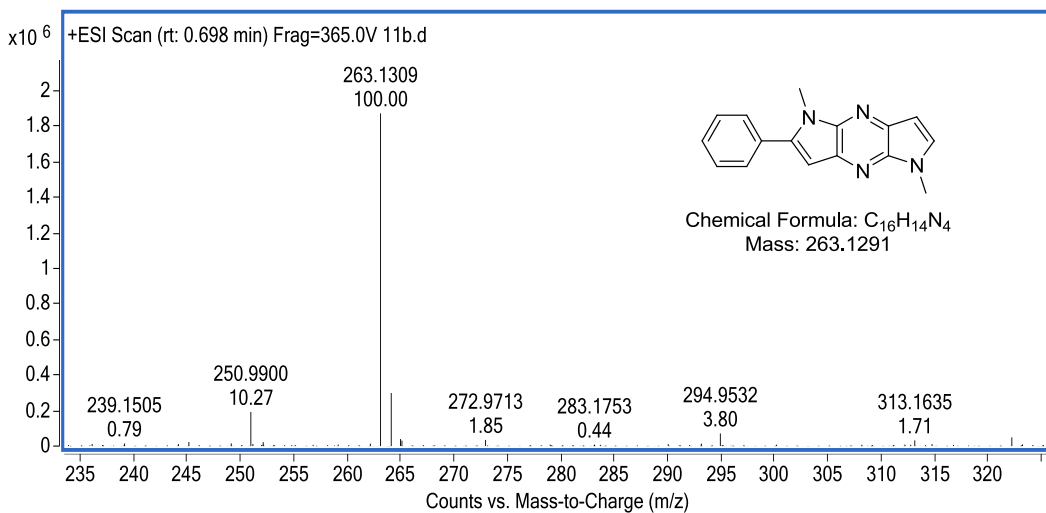

**HRMS – 11b**

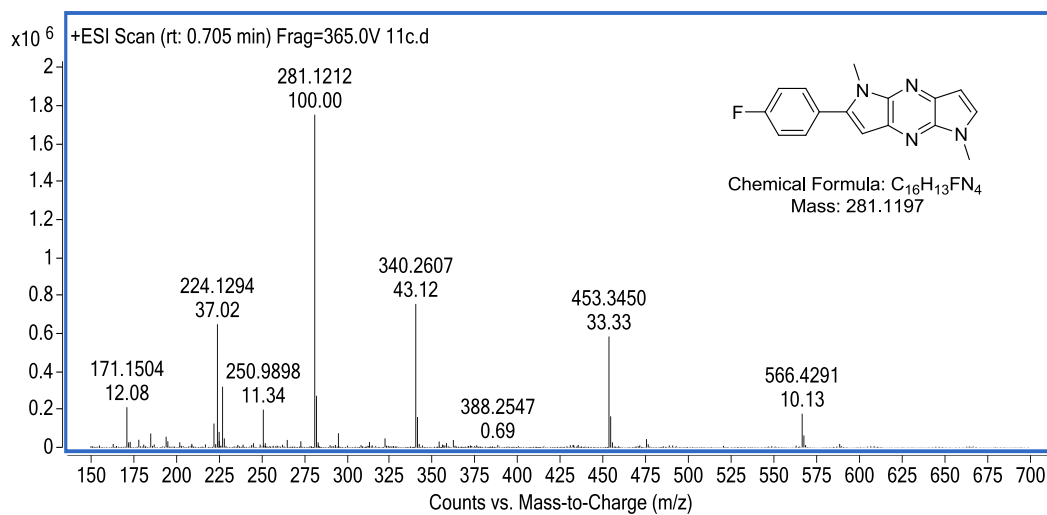

### HR/MS – 11c

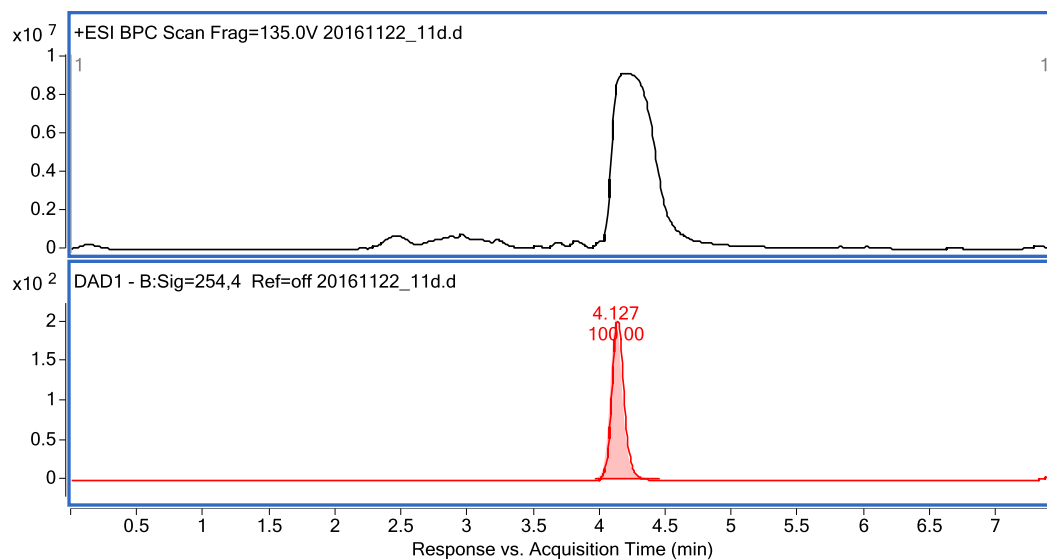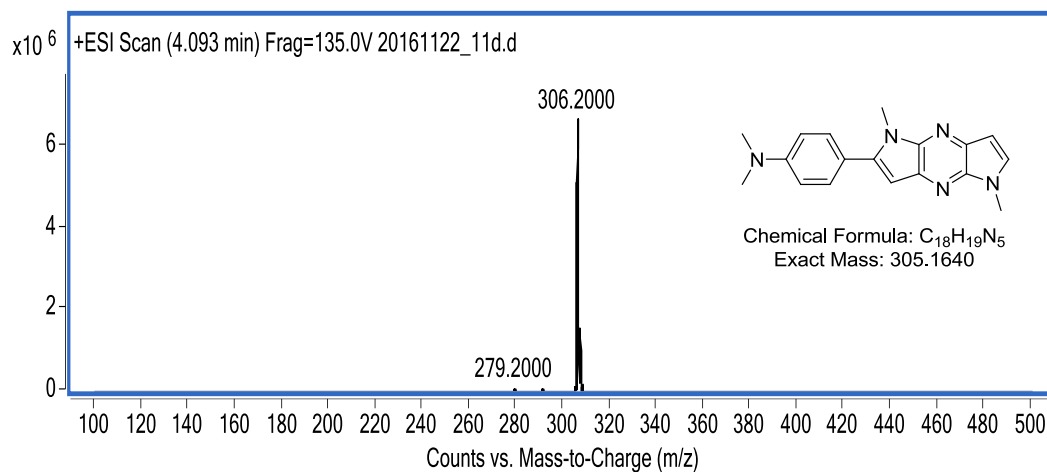

### LC/MS – 11d

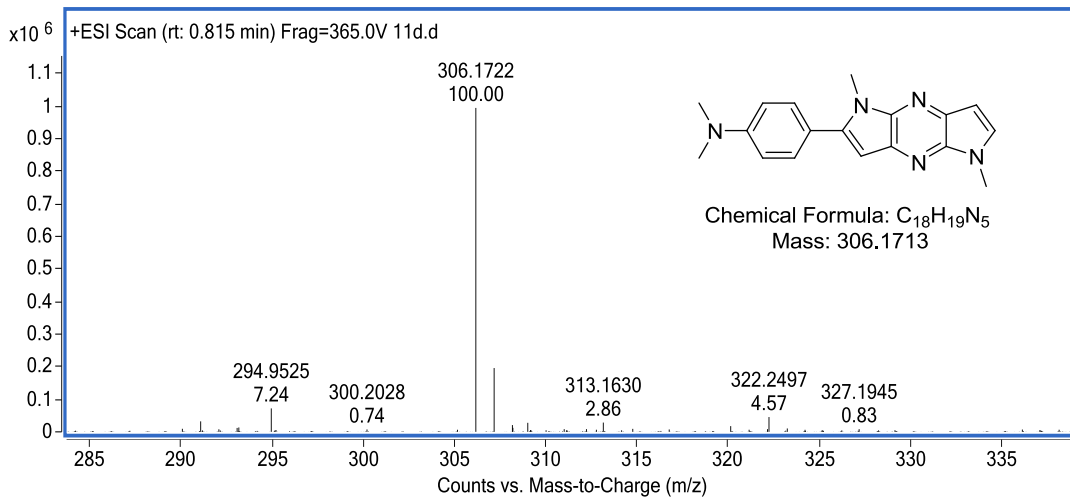

**HRMS – 11d**

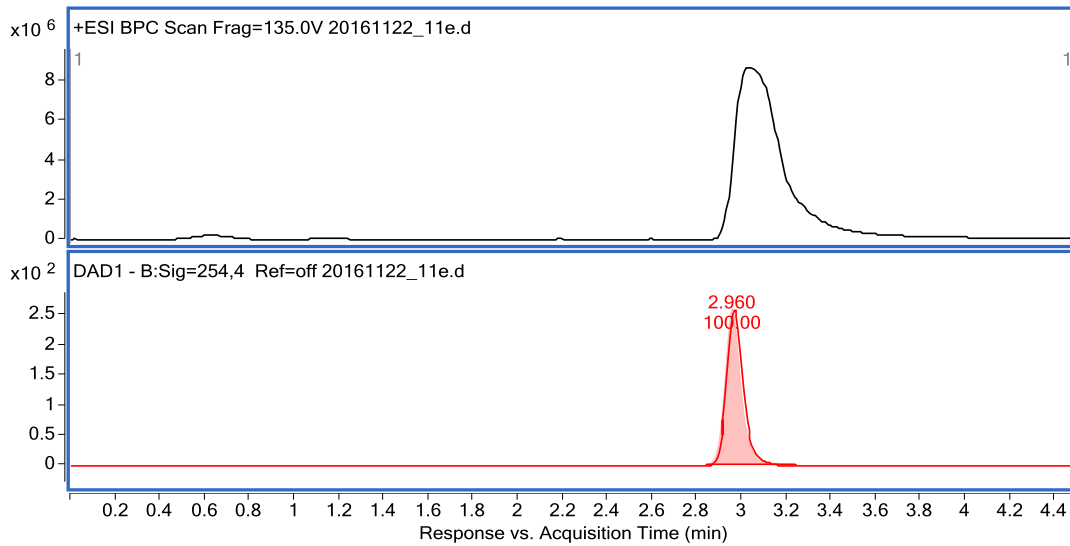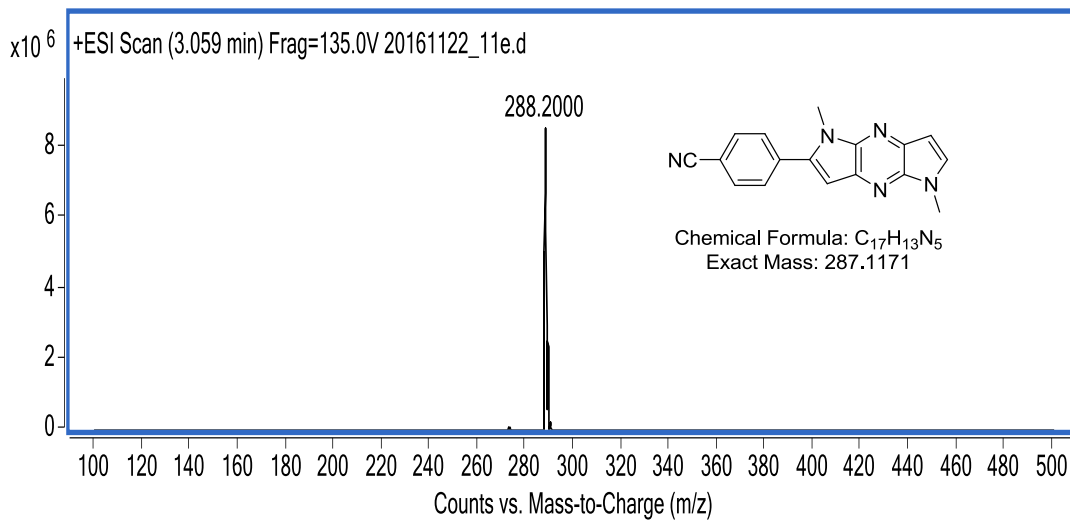

**LC/MS – 11e**

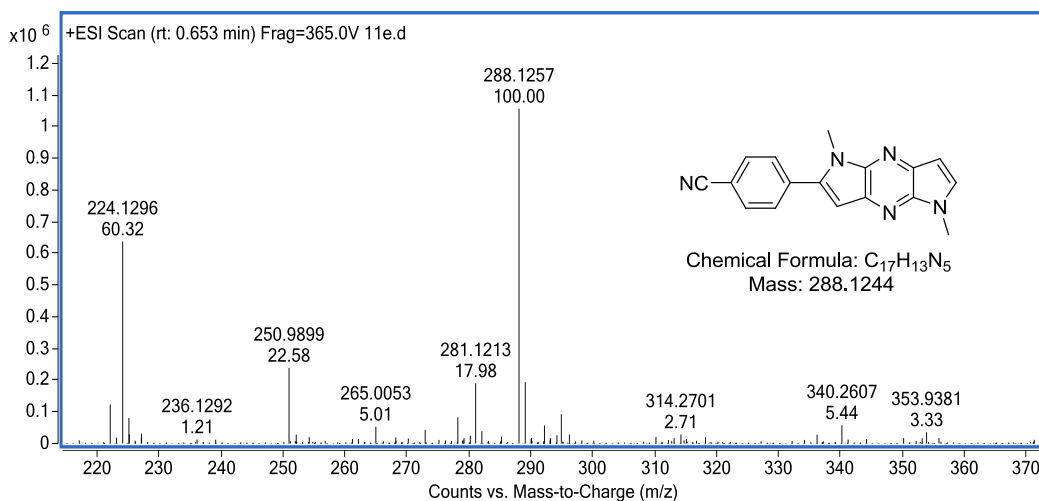

**HRMS – 11e**

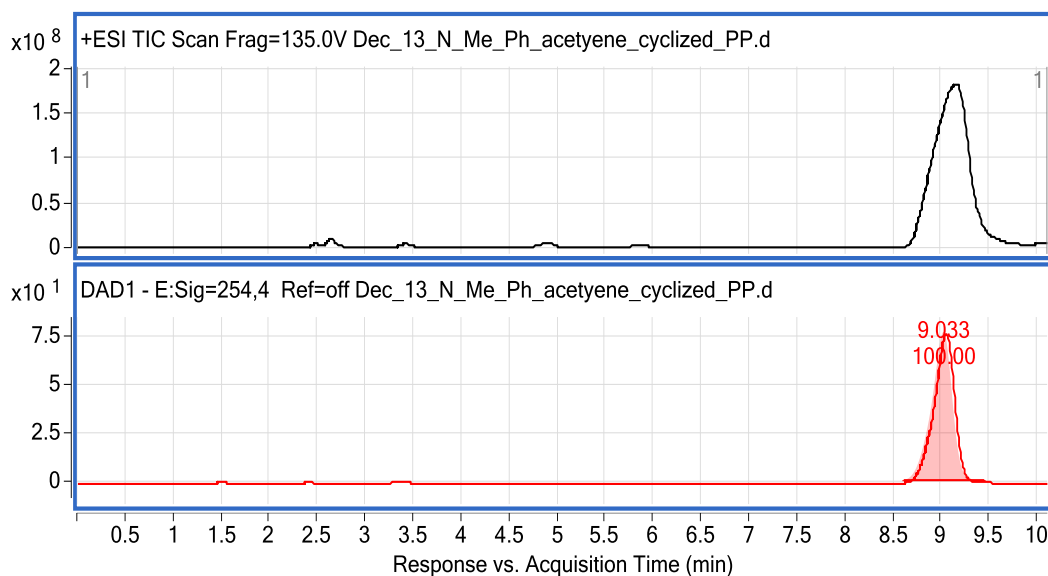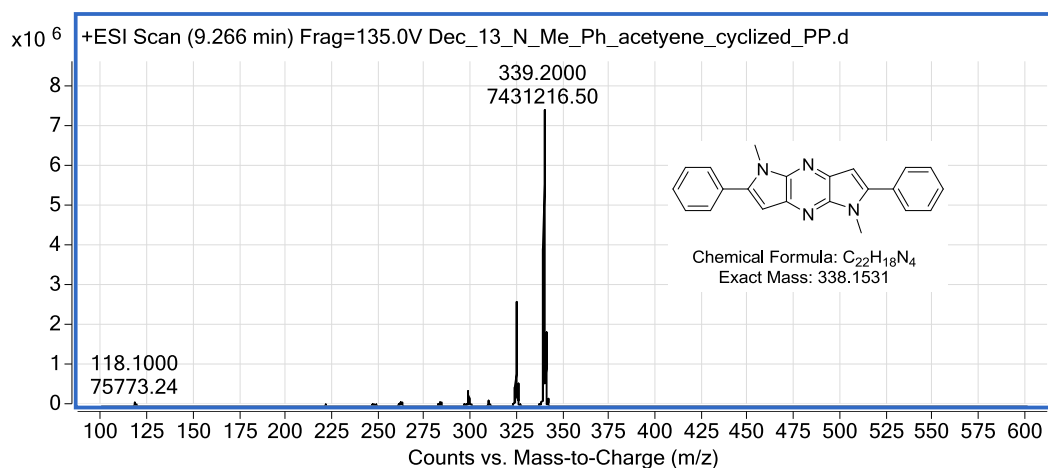

**LC/MS – 11f**



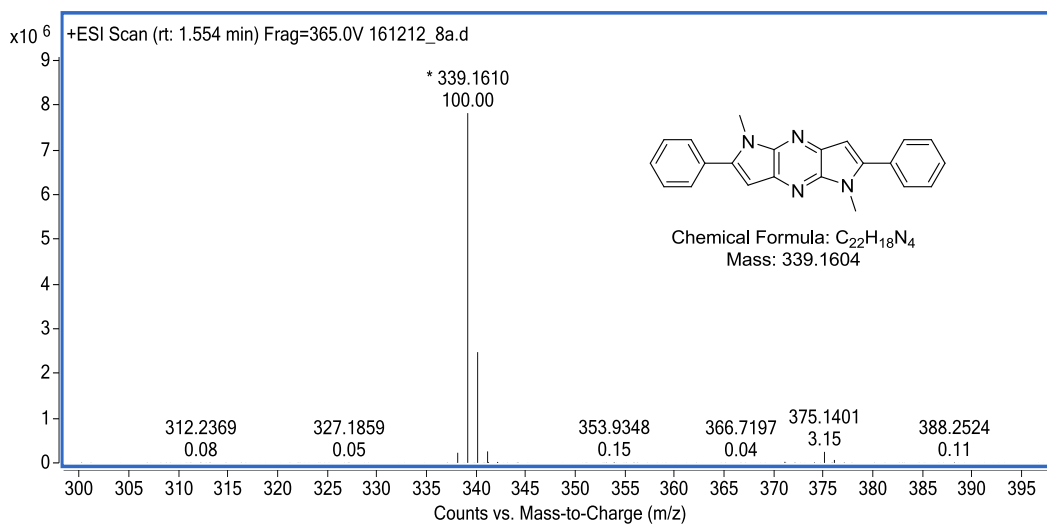

### HR/MS – 11f

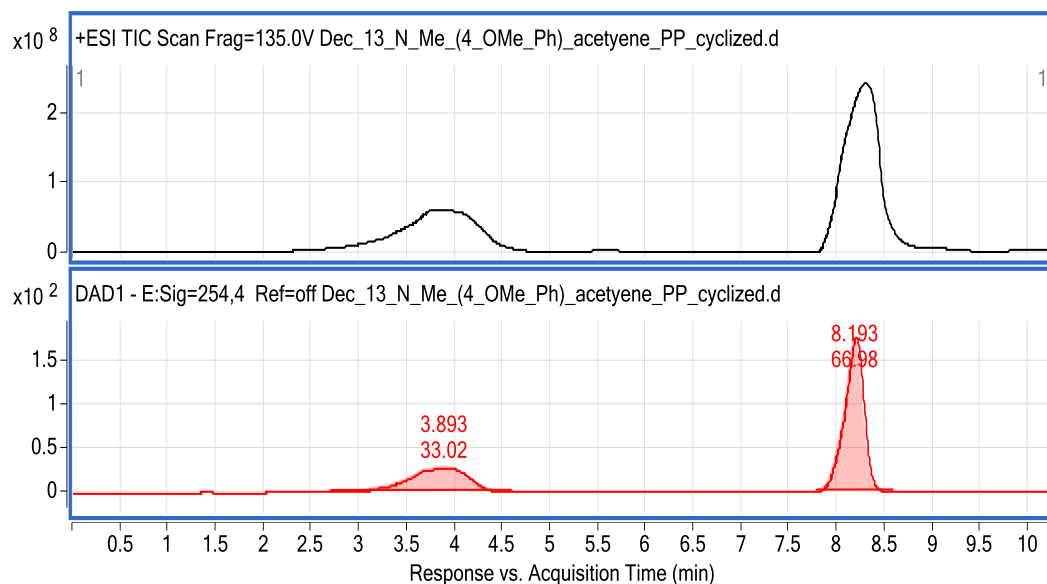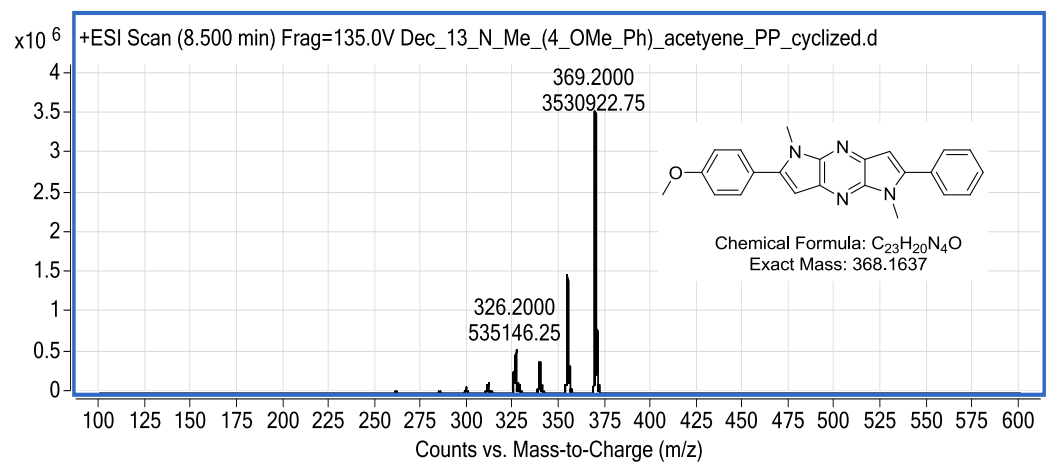

### LC/MS – 11g

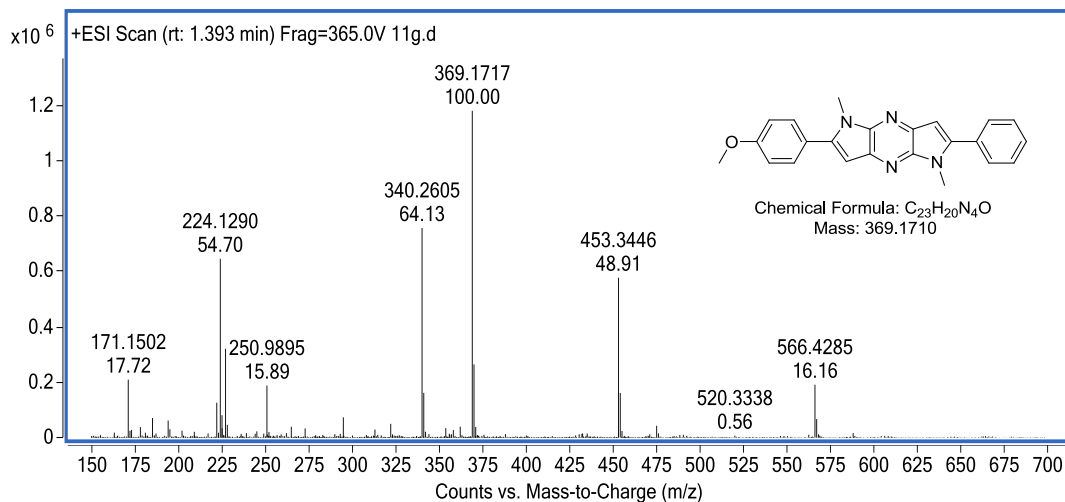

**HRMS – 11g**

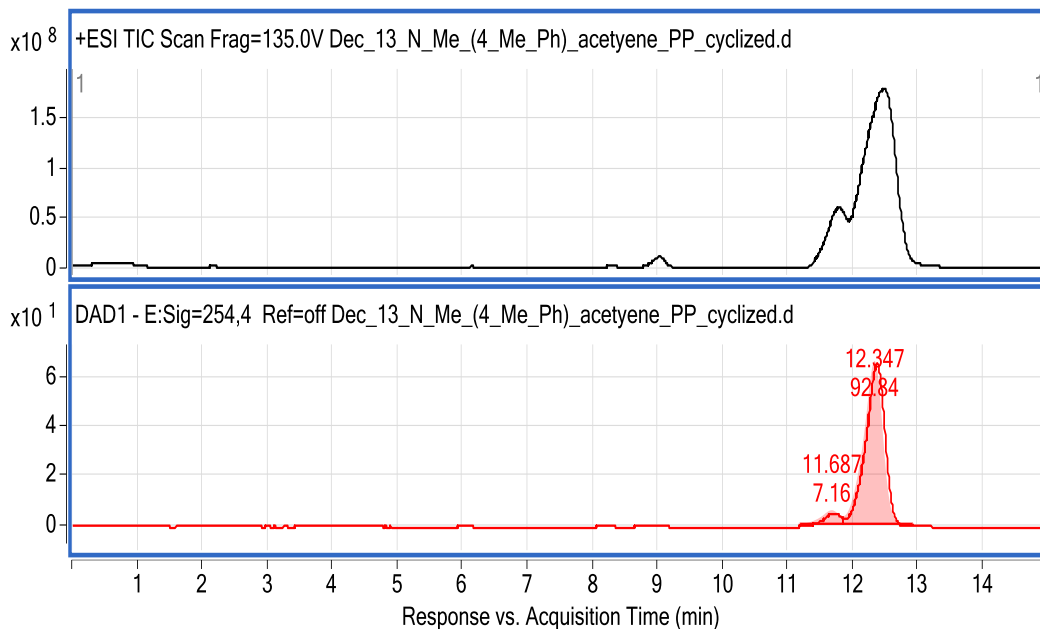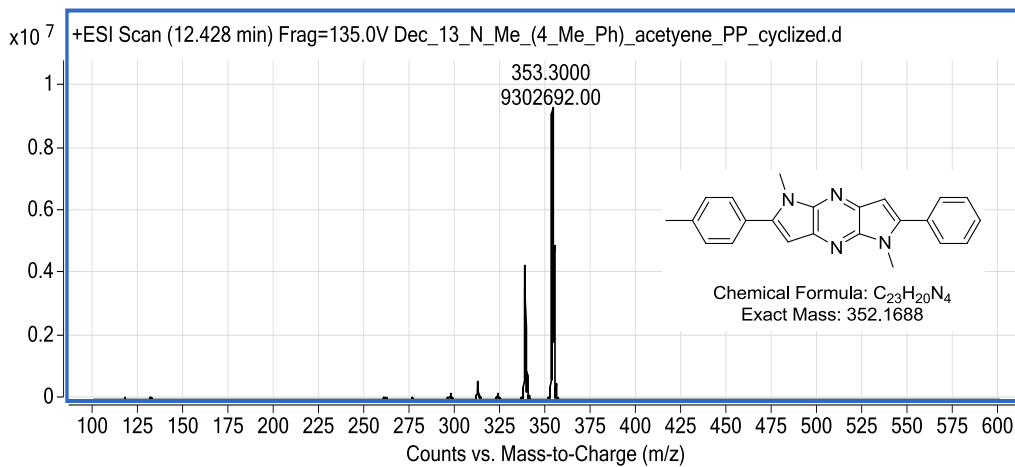

**LC/MS – 11h**

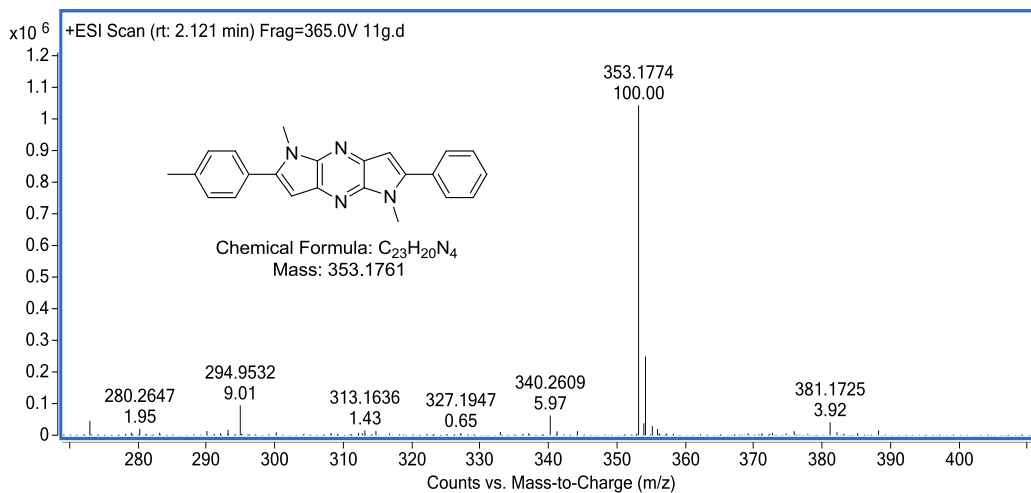

### HRMS – 11h

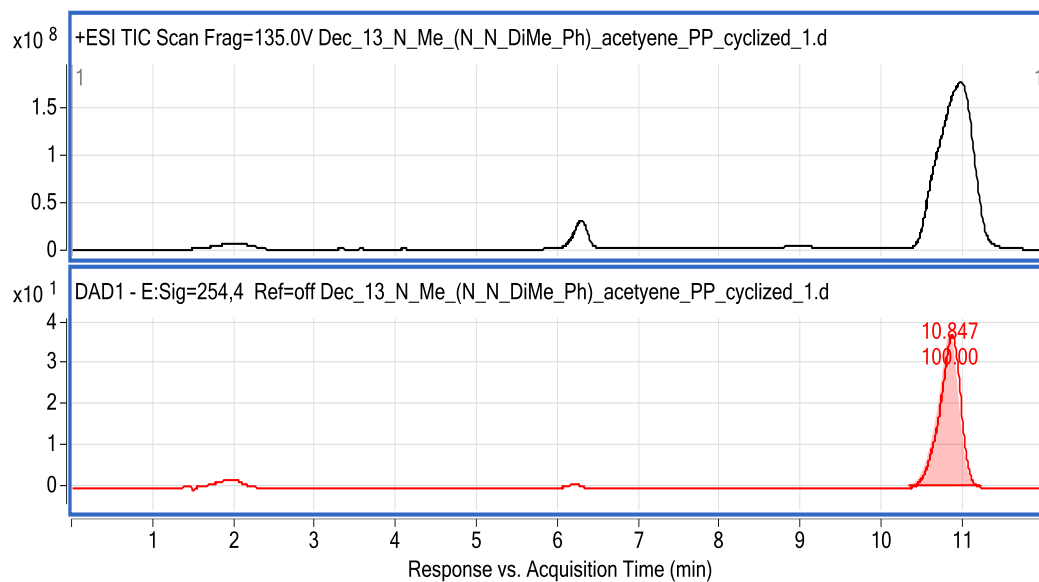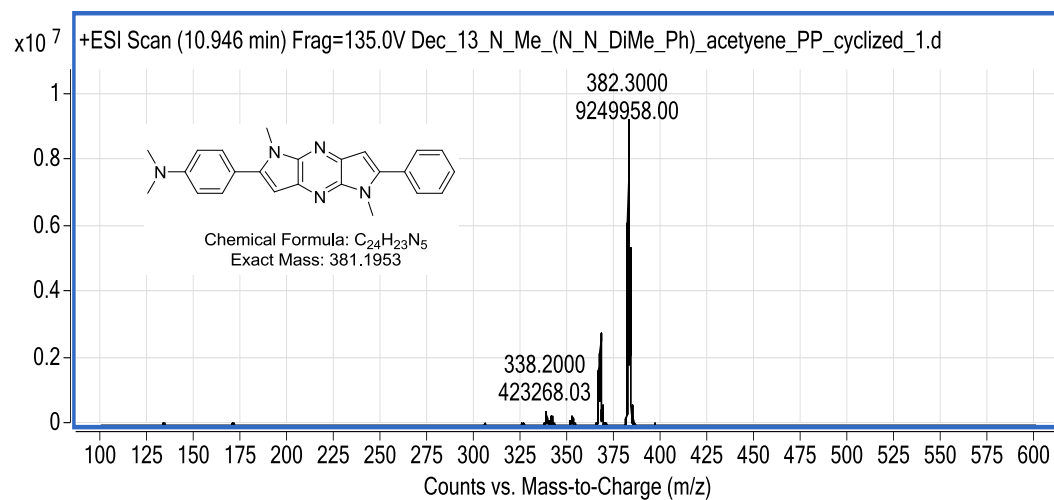

### LC/MS – 11i

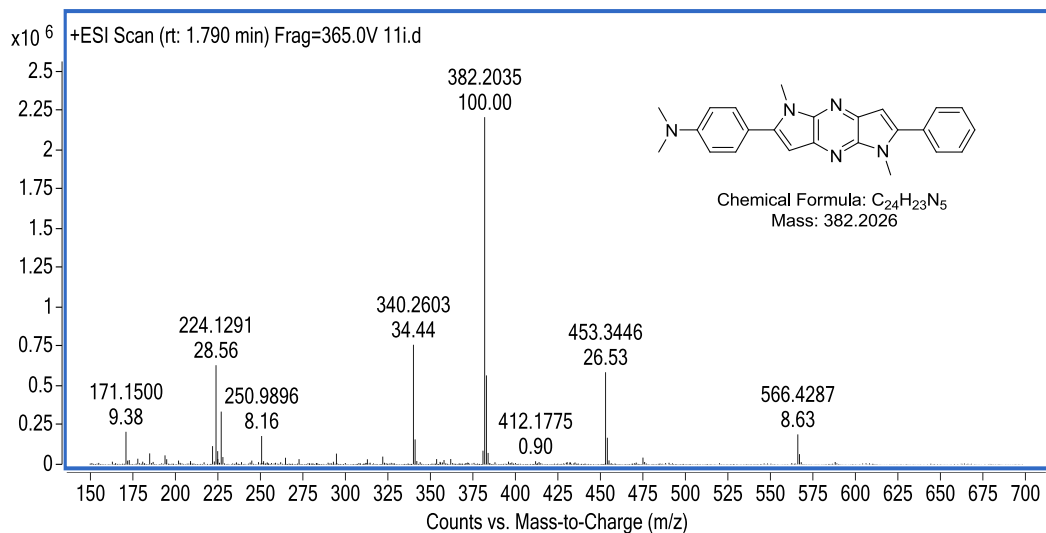

**HR/MS – 11i**

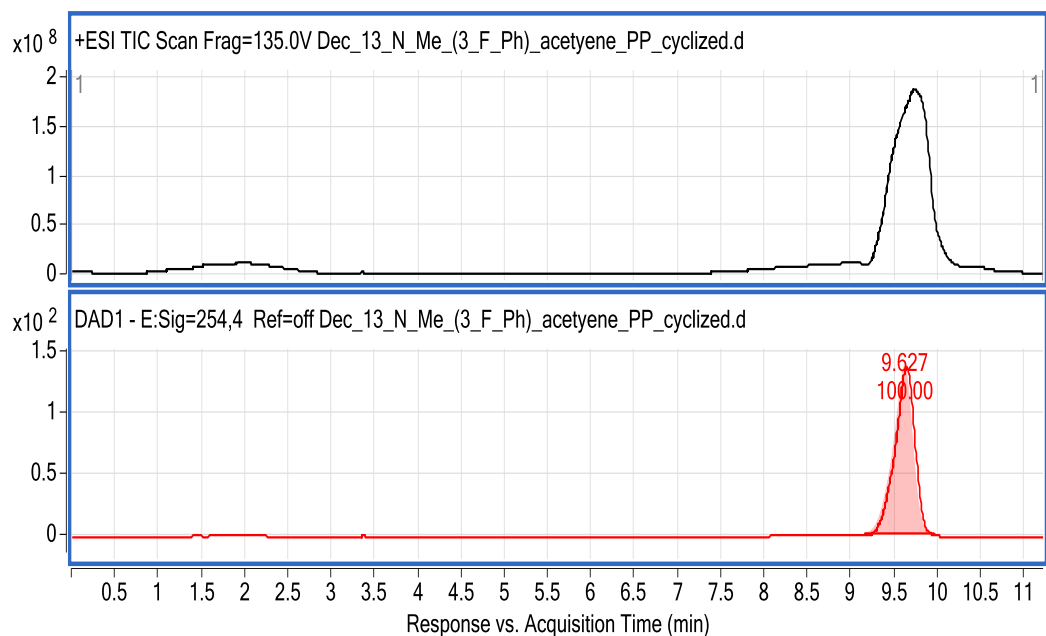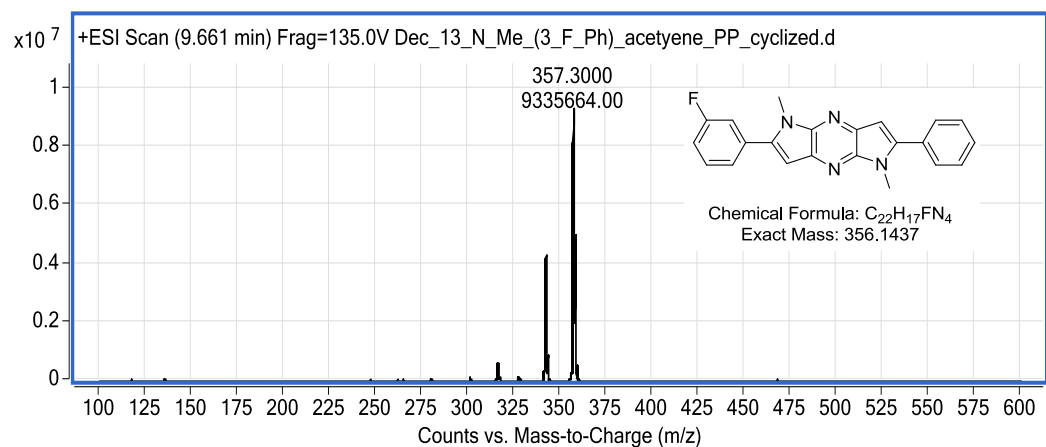

**LC/MS – 11j**

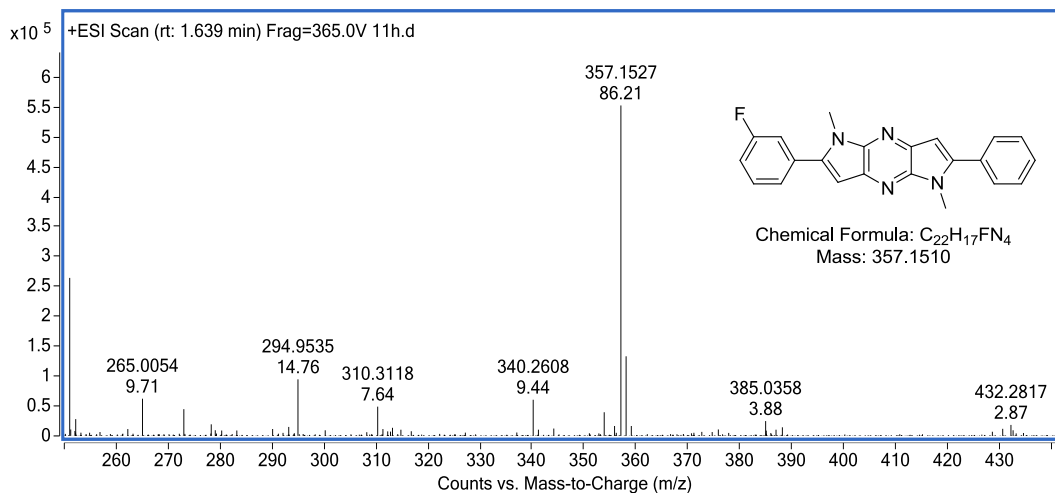

### HR/MS – 11j

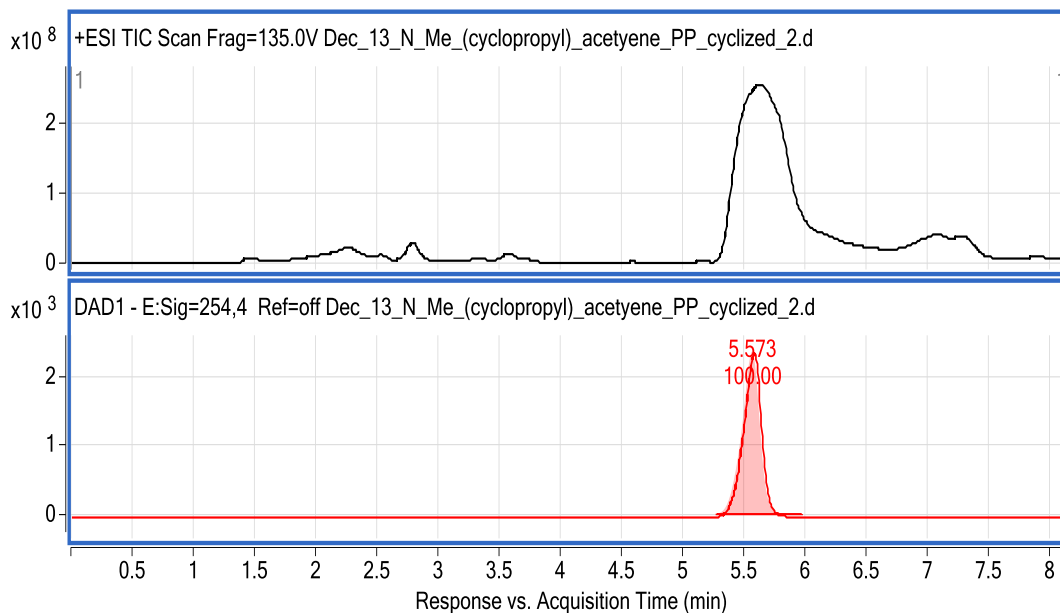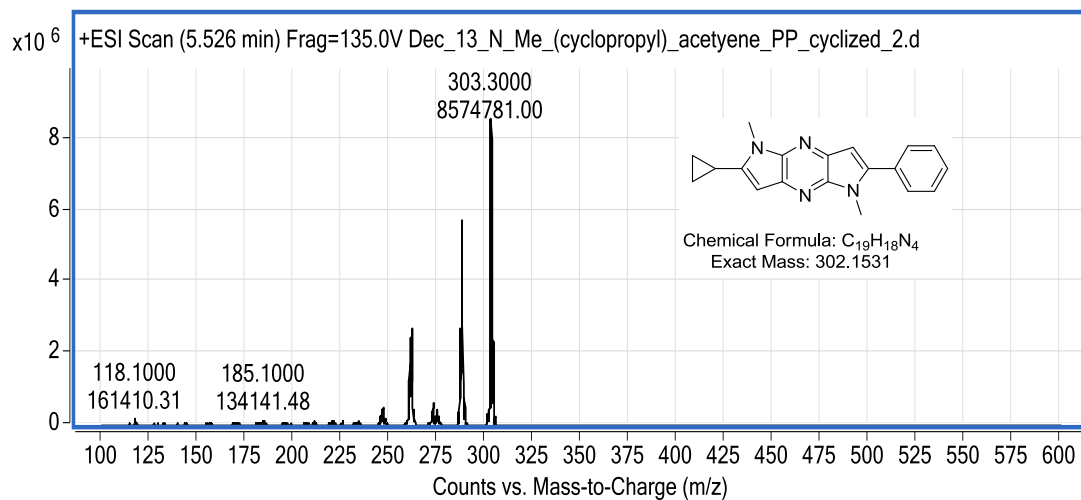

### LC/MS – 11k

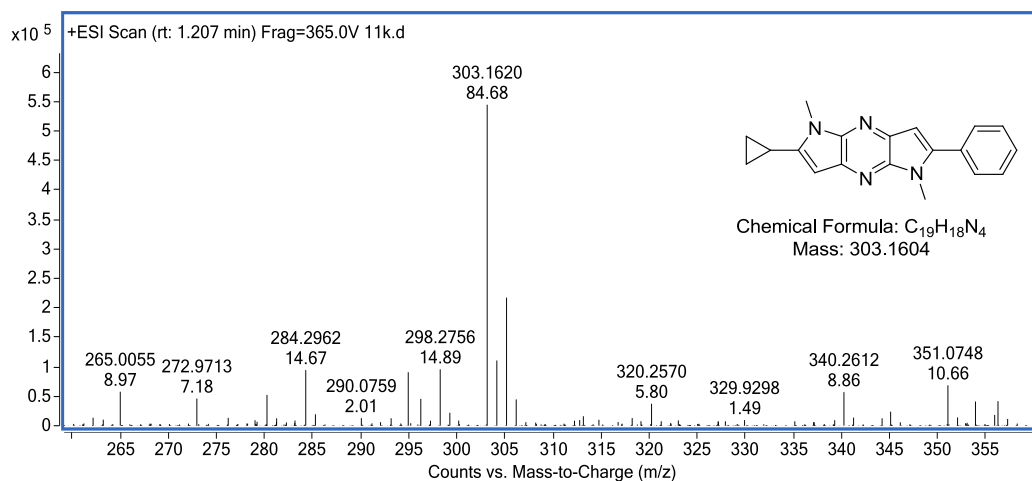

**HR/MS – 11k**

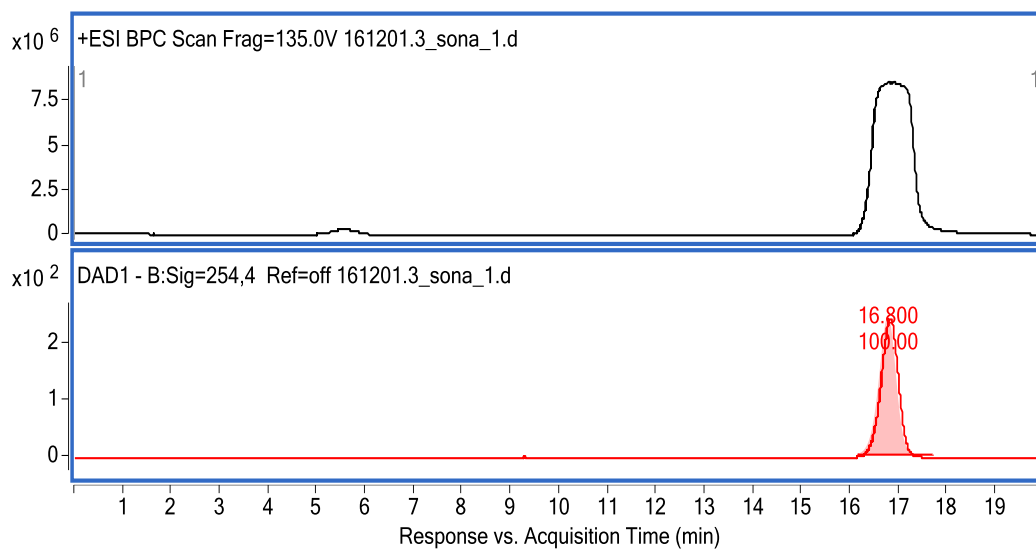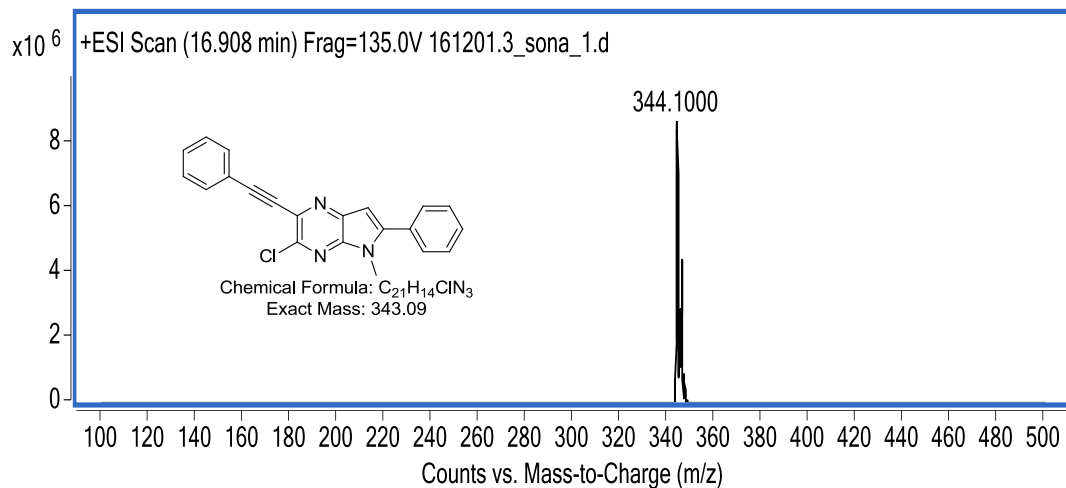

**LC/MS – 12b**

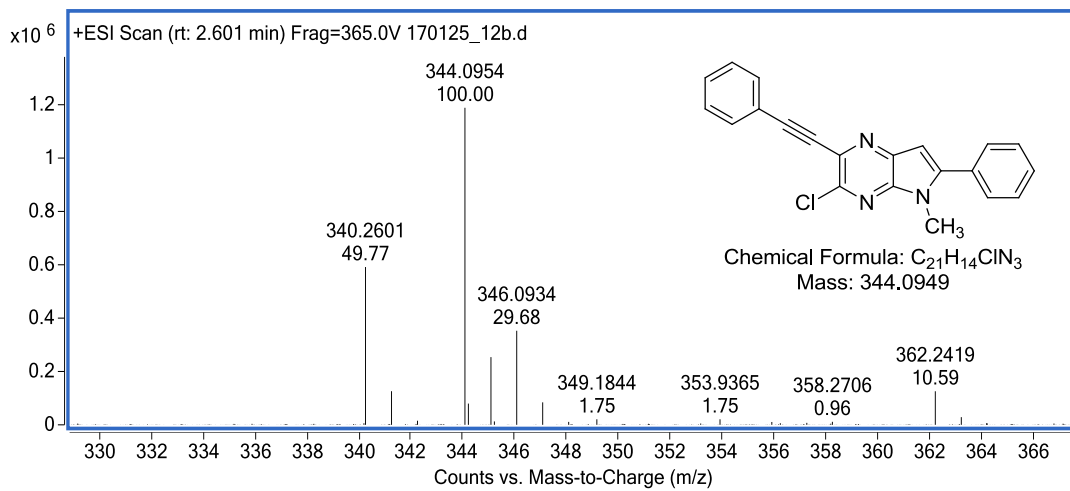

**HR/MS – 12b**

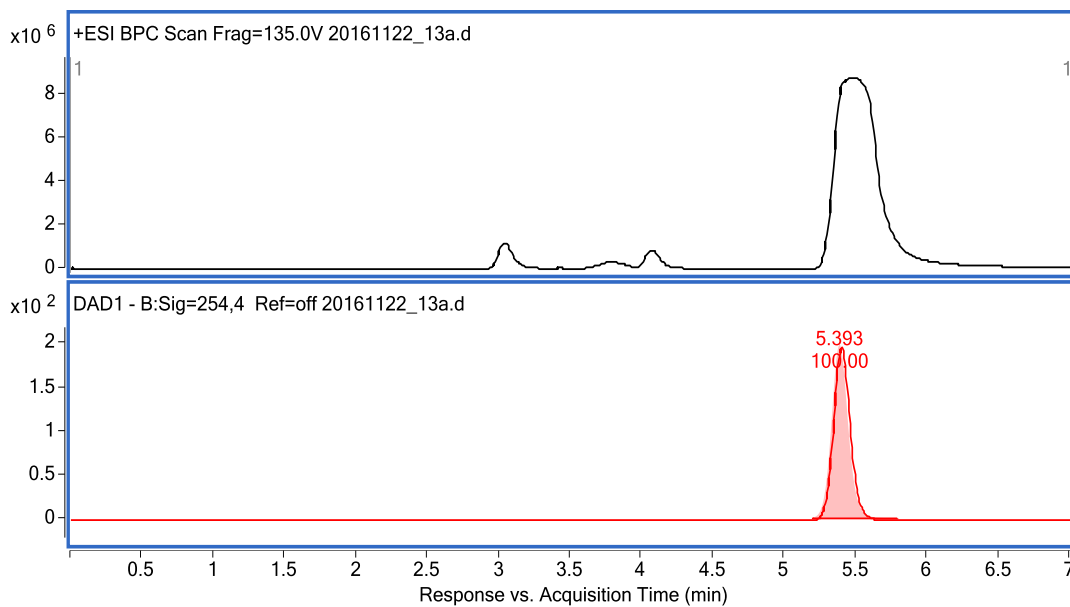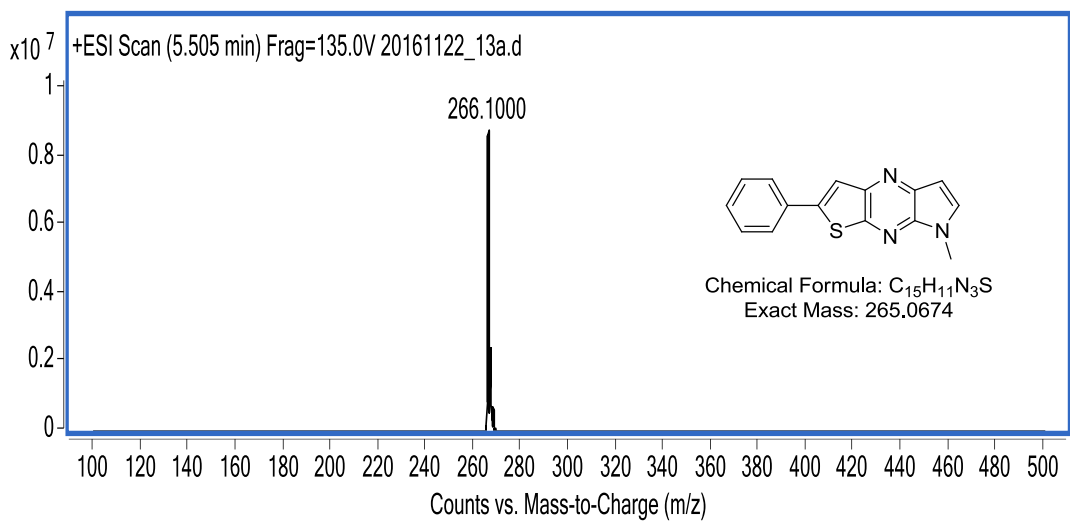

**LC/MS – 13a**

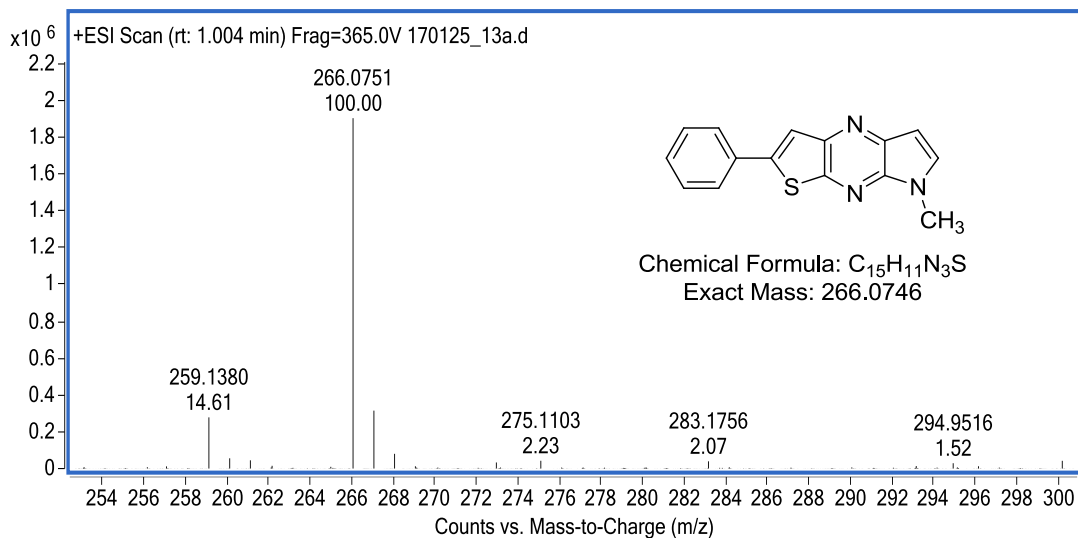

### HRMS – 13a

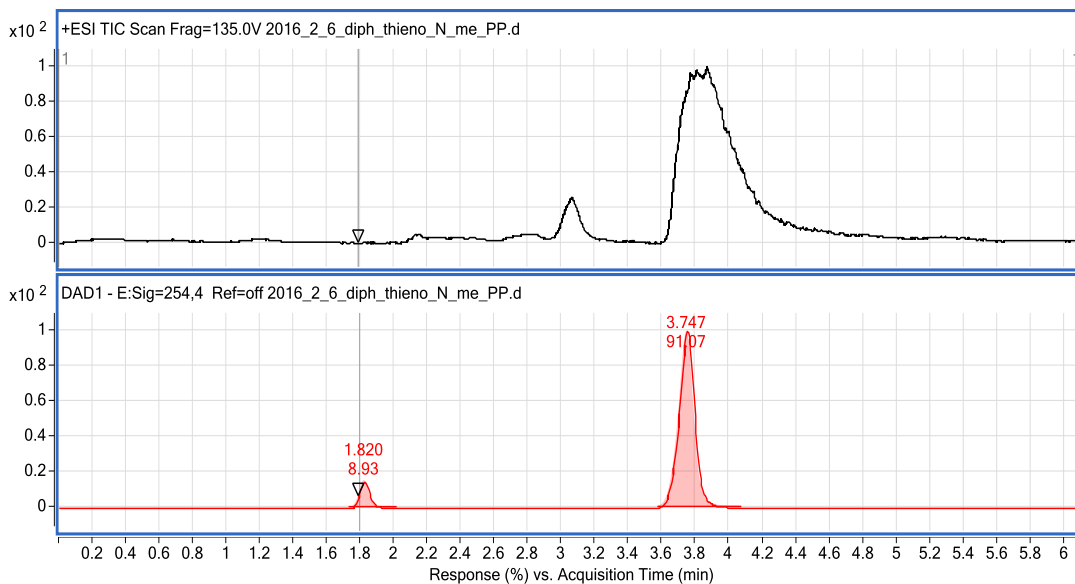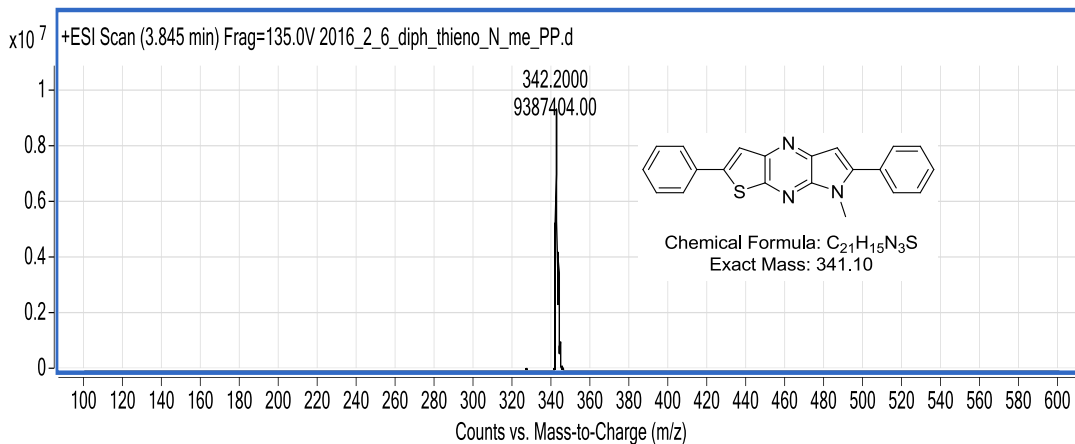

### LC/MS – 13b



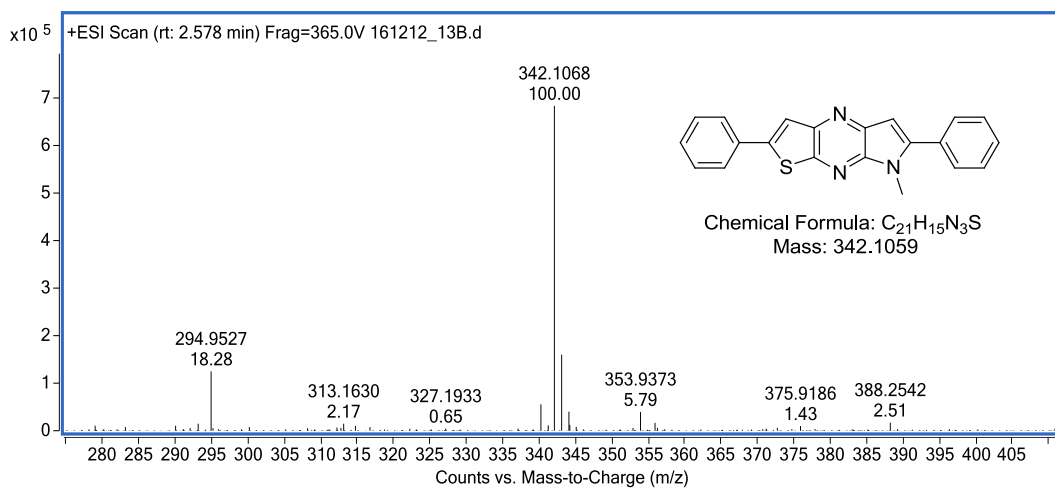

**HR/MS – 13b**

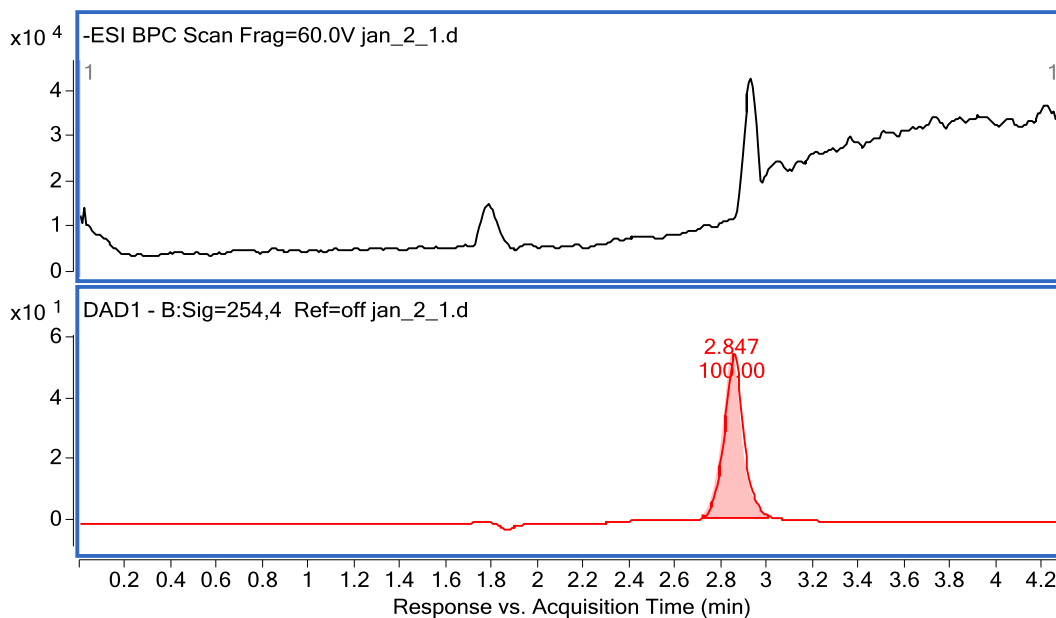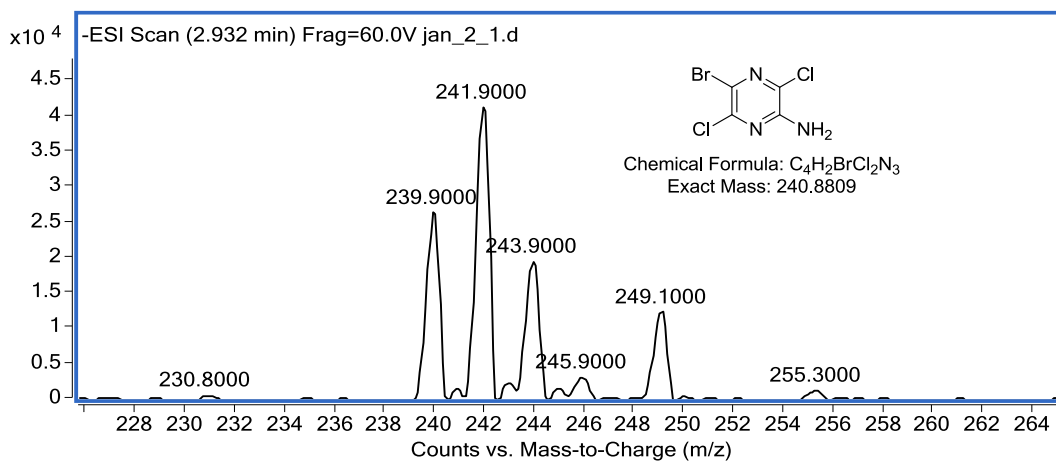

**LC/MS – 15**

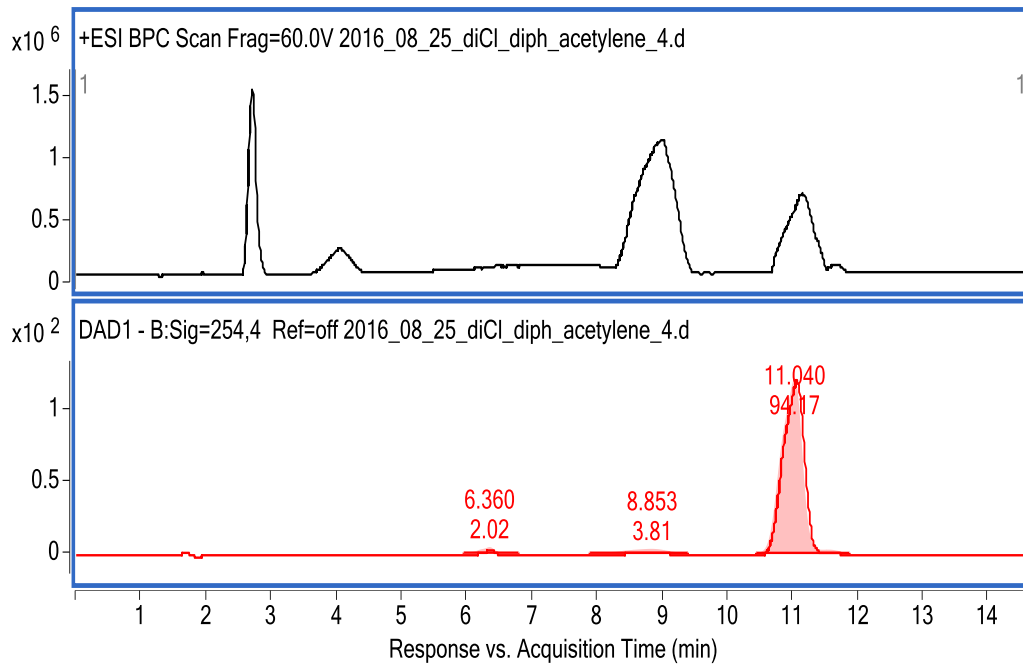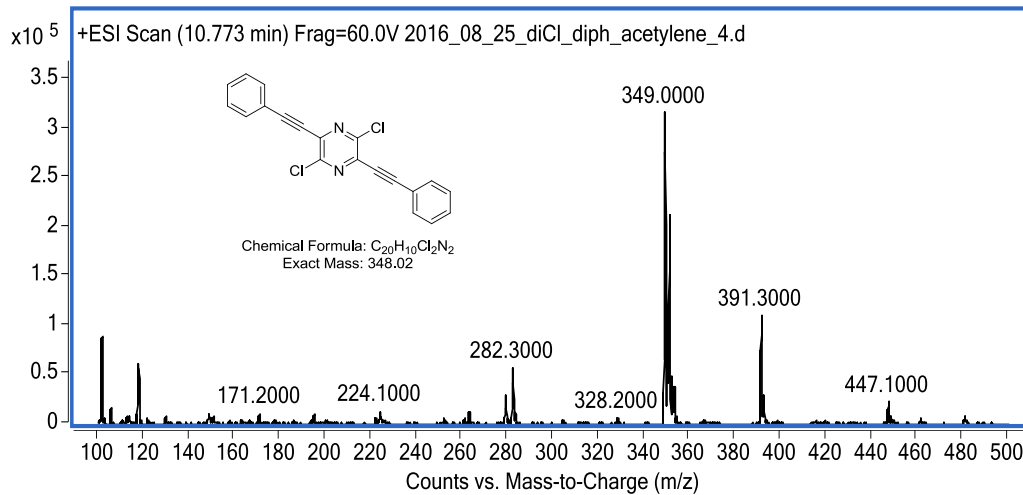

LC/MS - 17

## Single crystal XRD data

Table 1. Crystal data and structure refinement for compound 6f

|                                   |                                                |                  |
|-----------------------------------|------------------------------------------------|------------------|
| Identification code               | 20161123_0m                                    |                  |
| Empirical formula                 | C <sub>17</sub> H <sub>16</sub> N <sub>4</sub> |                  |
| Formula weight                    | 276.34                                         |                  |
| Temperature                       | 296(1) K                                       |                  |
| Wavelength                        | 0.71073 Å                                      |                  |
| Crystal system                    | Monoclinic                                     |                  |
| Space group                       | P2(1)/n                                        |                  |
| Unit cell dimensions              | a = 9.6046(4) Å                                | α = 90°.         |
|                                   | b = 10.6651(5) Å                               | β = 100.530(3)°. |
|                                   | c = 14.3071(6) Å                               | γ = 90°.         |
| Volume                            | 1440.85(11) Å <sup>3</sup>                     |                  |
| Z                                 | 4                                              |                  |
| Density (calculated)              | 1.274 Mg/m <sup>3</sup>                        |                  |
| Absorption coefficient            | 0.079 mm <sup>-1</sup>                         |                  |
| F(000)                            | 584                                            |                  |
| Crystal size                      | 0.40 x 0.30 x 0.16 mm <sup>3</sup>             |                  |
| Theta range for data collection   | 2.37 to 28.33°                                 |                  |
| Index ranges                      | -12 ≤ h ≤ 12, 0 ≤ k ≤ 14, 0 ≤ l ≤ 19           |                  |
| Reflections collected             | 3579                                           |                  |
| Independent reflections           | 3579 [R(int) = 0.0000]                         |                  |
| Completeness to theta = 28.33°    | 99.6 %                                         |                  |
| Absorption correction             | Multi-scan                                     |                  |
| Max. and min. transmission        | 0.9875 and 0.9692                              |                  |
| Refinement method                 | Full-matrix least-squares on F <sup>2</sup>    |                  |
| Data / restraints / parameters    | 3579 / 0 / 208                                 |                  |
| Goodness-of-fit on F <sup>2</sup> | 1.123                                          |                  |
| Final R indices [I > 2σ(I)]       | R1 = 0.0597, wR2 = 0.1485                      |                  |
| R indices (all data)              | R1 = 0.0793, wR2 = 0.1617                      |                  |
| Largest diff. peak and hole       | 0.283 and -0.264 e.Å <sup>-3</sup>             |                  |

Table 2. Atomic coordinates ( $\times 10^4$ ) and equivalent isotropic displacement parameters ( $\text{\AA}^2 \times 10^3$ ) for compound 6f.  $U(\text{eq})$  is defined as one third of the trace of the orthogonalized  $U^{ij}$  tensor.

|       | x       | y        | z        | $U(\text{eq})$ |
|-------|---------|----------|----------|----------------|
| N(1)  | 2022(2) | 4912(1)  | -452(1)  | 52(1)          |
| N(2)  | 3250(1) | 6650(1)  | 398(1)   | 47(1)          |
| N(3)  | 3945(1) | 8684(1)  | 1042(1)  | 47(1)          |
| N(4)  | 650(2)  | 7984(1)  | -433(1)  | 53(1)          |
| C(1)  | 2136(2) | 6134(2)  | -162(1)  | 45(1)          |
| C(2)  | 3012(2) | 7864(2)  | 518(1)   | 43(1)          |
| C(3)  | 3301(2) | 9863(2)  | 1001(1)  | 46(1)          |
| C(4)  | 1974(2) | 9791(2)  | 458(1)   | 52(1)          |
| C(5)  | 1760(2) | 8536(2)  | 130(1)   | 47(1)          |
| C(6)  | 860(2)  | 6763(2)  | -579(1)  | 48(1)          |
| C(7)  | -12(2)  | 5845(2)  | -1125(1) | 56(1)          |
| C(8)  | 720(2)  | 4760(2)  | -1028(1) | 57(1)          |
| C(9)  | 3064(3) | 3948(2)  | -153(2)  | 74(1)          |
| C(10) | 5328(2) | 8326(2)  | 1556(2)  | 65(1)          |
| C(11) | 3989(2) | 10976(2) | 1486(1)  | 46(1)          |
| C(12) | 5364(2) | 11335(2) | 1424(1)  | 54(1)          |
| C(13) | 5937(2) | 12433(2) | 1840(1)  | 58(1)          |
| C(14) | 5169(2) | 13219(2) | 2331(1)  | 55(1)          |
| C(15) | 3810(2) | 12848(2) | 2404(1)  | 56(1)          |
| C(16) | 3227(2) | 11755(2) | 1991(1)  | 52(1)          |
| C(17) | 5772(3) | 14444(2) | 2751(2)  | 84(1)          |

Table 3. Bond lengths [ $\text{\AA}$ ] and angles [ $^\circ$ ] for compound 6f.

---

|              |          |
|--------------|----------|
| N(1)-C(1)    | 1.365(2) |
| N(1)-C(8)    | 1.376(2) |
| N(1)-C(9)    | 1.445(3) |
| N(2)-C(2)    | 1.332(2) |
| N(2)-C(1)    | 1.332(2) |
| N(3)-C(2)    | 1.372(2) |
| N(3)-C(3)    | 1.398(2) |
| N(3)-C(10)   | 1.447(2) |
| N(4)-C(6)    | 1.340(2) |
| N(4)-C(5)    | 1.348(2) |
| C(1)-C(6)    | 1.428(2) |
| C(2)-C(5)    | 1.422(2) |
| C(3)-C(4)    | 1.368(2) |
| C(3)-C(11)   | 1.470(2) |
| C(4)-C(5)    | 1.422(2) |
| C(4)-H(4B)   | 0.9300   |
| C(6)-C(7)    | 1.425(2) |
| C(7)-C(8)    | 1.347(3) |
| C(7)-H(7A)   | 0.9300   |
| C(8)-H(8A)   | 0.9300   |
| C(9)-H(9A)   | 1.00(3)  |
| C(9)-H(9B)   | 0.96(3)  |
| C(9)-H(9C)   | 0.94(3)  |
| C(10)-H(10A) | 1.02(3)  |
| C(10)-H(10B) | 1.05(3)  |
| C(10)-H(10C) | 0.92(3)  |
| C(11)-C(12)  | 1.393(2) |
| C(11)-C(16)  | 1.393(2) |
| C(12)-C(13)  | 1.381(3) |
| C(12)-H(12A) | 0.9300   |
| C(13)-C(14)  | 1.389(3) |
| C(13)-H(13A) | 0.9300   |
| C(14)-C(15)  | 1.386(3) |
| C(14)-C(17)  | 1.509(3) |
| C(15)-C(16)  | 1.379(3) |
| C(15)-H(15A) | 0.9300   |

|                 |            |
|-----------------|------------|
| C(16)-H(16A)    | 0.9300     |
| C(17)-H(17A)    | 0.9600     |
| C(17)-H(17B)    | 0.9600     |
| C(17)-H(17C)    | 0.9600     |
| <br>            |            |
| C(1)-N(1)-C(8)  | 107.92(15) |
| C(1)-N(1)-C(9)  | 125.25(16) |
| C(8)-N(1)-C(9)  | 126.74(17) |
| C(2)-N(2)-C(1)  | 110.00(13) |
| C(2)-N(3)-C(3)  | 108.06(13) |
| C(2)-N(3)-C(10) | 123.86(15) |
| C(3)-N(3)-C(10) | 128.07(15) |
| C(6)-N(4)-C(5)  | 113.07(14) |
| N(2)-C(1)-N(1)  | 125.99(15) |
| N(2)-C(1)-C(6)  | 126.14(15) |
| N(1)-C(1)-C(6)  | 107.86(15) |
| N(2)-C(2)-N(3)  | 125.44(14) |
| N(2)-C(2)-C(5)  | 126.27(15) |
| N(3)-C(2)-C(5)  | 108.29(14) |
| C(4)-C(3)-N(3)  | 109.47(14) |
| C(4)-C(3)-C(11) | 127.24(15) |
| N(3)-C(3)-C(11) | 123.30(14) |
| C(3)-C(4)-C(5)  | 107.65(15) |
| C(3)-C(4)-H(4B) | 126.2      |
| C(5)-C(4)-H(4B) | 126.2      |
| N(4)-C(5)-C(4)  | 131.25(15) |
| N(4)-C(5)-C(2)  | 122.23(15) |
| C(4)-C(5)-C(2)  | 106.52(14) |
| N(4)-C(6)-C(7)  | 131.50(16) |
| N(4)-C(6)-C(1)  | 122.28(15) |
| C(7)-C(6)-C(1)  | 106.22(15) |
| C(8)-C(7)-C(6)  | 106.88(16) |
| C(8)-C(7)-H(7A) | 126.6      |
| C(6)-C(7)-H(7A) | 126.6      |
| C(7)-C(8)-N(1)  | 111.12(16) |
| C(7)-C(8)-H(8A) | 124.4      |
| N(1)-C(8)-H(8A) | 124.4      |
| N(1)-C(9)-H(9A) | 108.2(18)  |

|                     |            |
|---------------------|------------|
| N(1)-C(9)-H(9B)     | 113.0(18)  |
| H(9A)-C(9)-H(9B)    | 106(2)     |
| N(1)-C(9)-H(9C)     | 111.7(18)  |
| H(9A)-C(9)-H(9C)    | 108(2)     |
| H(9B)-C(9)-H(9C)    | 110(2)     |
| N(3)-C(10)-H(10A)   | 111.0(14)  |
| N(3)-C(10)-H(10B)   | 109.1(14)  |
| H(10A)-C(10)-H(10B) | 105(2)     |
| N(3)-C(10)-H(10C)   | 107.1(18)  |
| H(10A)-C(10)-H(10C) | 116(2)     |
| H(10B)-C(10)-H(10C) | 109(2)     |
| C(12)-C(11)-C(16)   | 117.56(16) |
| C(12)-C(11)-C(3)    | 122.82(15) |
| C(16)-C(11)-C(3)    | 119.51(15) |
| C(13)-C(12)-C(11)   | 120.89(17) |
| C(13)-C(12)-H(12A)  | 119.6      |
| C(11)-C(12)-H(12A)  | 119.6      |
| C(12)-C(13)-C(14)   | 121.54(17) |
| C(12)-C(13)-H(13A)  | 119.2      |
| C(14)-C(13)-H(13A)  | 119.2      |
| C(15)-C(14)-C(13)   | 117.42(17) |
| C(15)-C(14)-C(17)   | 121.03(19) |
| C(13)-C(14)-C(17)   | 121.54(19) |
| C(16)-C(15)-C(14)   | 121.53(17) |
| C(16)-C(15)-H(15A)  | 119.2      |
| C(14)-C(15)-H(15A)  | 119.2      |
| C(15)-C(16)-C(11)   | 121.05(16) |
| C(15)-C(16)-H(16A)  | 119.5      |
| C(11)-C(16)-H(16A)  | 119.5      |
| C(14)-C(17)-H(17A)  | 109.5      |
| C(14)-C(17)-H(17B)  | 109.5      |
| H(17A)-C(17)-H(17B) | 109.5      |
| C(14)-C(17)-H(17C)  | 109.5      |
| H(17A)-C(17)-H(17C) | 109.5      |
| H(17B)-C(17)-H(17C) | 109.5      |

---

Symmetry transformations used to generate equivalent atoms:

Table 4. Anisotropic displacement parameters ( $\text{\AA}^2 \times 10^3$ ) for compound 6f. The anisotropic displacement factor exponent takes the form:  $-2\pi^2 [ h^2 a^{*2} U^{11} + \dots + 2 h k a^* b^* U^{12} ]$

|       | $U^{11}$ | $U^{22}$ | $U^{33}$ | $U^{23}$ | $U^{13}$ | $U^{12}$ |
|-------|----------|----------|----------|----------|----------|----------|
| N(1)  | 59(1)    | 45(1)    | 54(1)    | -8(1)    | 13(1)    | 3(1)     |
| N(2)  | 46(1)    | 45(1)    | 49(1)    | -4(1)    | 9(1)     | 8(1)     |
| N(3)  | 43(1)    | 45(1)    | 51(1)    | -4(1)    | 5(1)     | 8(1)     |
| N(4)  | 49(1)    | 46(1)    | 60(1)    | 3(1)     | 2(1)     | 4(1)     |
| C(1)  | 50(1)    | 43(1)    | 44(1)    | 0(1)     | 15(1)    | 5(1)     |
| C(2)  | 43(1)    | 43(1)    | 45(1)    | 0(1)     | 10(1)    | 5(1)     |
| C(3)  | 47(1)    | 43(1)    | 50(1)    | 0(1)     | 11(1)    | 6(1)     |
| C(4)  | 48(1)    | 42(1)    | 63(1)    | 3(1)     | 4(1)     | 8(1)     |
| C(5)  | 45(1)    | 44(1)    | 51(1)    | 4(1)     | 7(1)     | 6(1)     |
| C(6)  | 49(1)    | 48(1)    | 47(1)    | 2(1)     | 9(1)     | 2(1)     |
| C(7)  | 57(1)    | 58(1)    | 51(1)    | -2(1)    | 3(1)     | -3(1)    |
| C(8)  | 64(1)    | 56(1)    | 50(1)    | -9(1)    | 12(1)    | -6(1)    |
| C(9)  | 79(2)    | 52(1)    | 90(2)    | -13(1)   | 12(1)    | 18(1)    |
| C(10) | 52(1)    | 60(1)    | 75(1)    | -18(1)   | -8(1)    | 16(1)    |
| C(11) | 50(1)    | 43(1)    | 46(1)    | 2(1)     | 8(1)     | 4(1)     |
| C(12) | 54(1)    | 56(1)    | 54(1)    | -2(1)    | 16(1)    | 2(1)     |
| C(13) | 53(1)    | 62(1)    | 60(1)    | 3(1)     | 11(1)    | -8(1)    |
| C(14) | 59(1)    | 51(1)    | 51(1)    | 0(1)     | -2(1)    | 0(1)     |
| C(15) | 59(1)    | 51(1)    | 56(1)    | -6(1)    | 8(1)     | 8(1)     |
| C(16) | 48(1)    | 48(1)    | 60(1)    | -3(1)    | 12(1)    | 3(1)     |
| C(17) | 82(2)    | 64(1)    | 100(2)   | -21(1)   | 2(1)     | -13(1)   |

Table 5. Hydrogen coordinates ( $\times 10^4$ ) and isotropic displacement parameters ( $\text{\AA}^2 \times 10^3$ ) for compound 6f.

|       | x        | y        | z        | U(eq) |
|-------|----------|----------|----------|-------|
| H(4B) | 1328     | 10446    | 328      | 62    |
| H(7A) | -913     | 5970     | -1480    | 67    |
| H(8A) | 388      | 4007     | -1313    | 68    |
| H(9A) | 2610(30) | 3120(30) | -330(20) | 111   |
| H(9B) | 3390(30) | 3930(30) | 520(20)  | 111   |
| H(9C) | 3850(30) | 4020(30) | -460(20) | 111   |



|        |          |          |          |     |
|--------|----------|----------|----------|-----|
| H(10A) | 5660(30) | 8920(30) | 2112(19) | 97  |
| H(10B) | 6070(30) | 8440(20) | 1112(18) | 97  |
| H(10C) | 5280(30) | 7490(30) | 1710(20) | 97  |
| H(12A) | 5902     | 10830    | 1097     | 64  |
| H(13A) | 6858     | 12650    | 1791     | 70  |
| H(15A) | 3279     | 13348    | 2740     | 67  |
| H(16A) | 2310     | 11534    | 2049     | 63  |
| H(17A) | 5090     | 14855    | 3060     | 126 |
| H(17B) | 5990     | 14972    | 2253     | 126 |
| H(17C) | 6620     | 14286    | 3206     | 126 |

---

Table 6. Torsion angles [°] for compound 6f.

|                       |             |
|-----------------------|-------------|
| C(2)-N(2)-C(1)-N(1)   | 178.68(15)  |
| C(2)-N(2)-C(1)-C(6)   | -0.3(2)     |
| C(8)-N(1)-C(1)-N(2)   | -179.43(15) |
| C(9)-N(1)-C(1)-N(2)   | 3.8(3)      |
| C(8)-N(1)-C(1)-C(6)   | -0.33(18)   |
| C(9)-N(1)-C(1)-C(6)   | -177.12(19) |
| C(1)-N(2)-C(2)-N(3)   | -179.00(14) |
| C(1)-N(2)-C(2)-C(5)   | 1.0(2)      |
| C(3)-N(3)-C(2)-N(2)   | -179.51(15) |
| C(10)-N(3)-C(2)-N(2)  | -1.0(3)     |
| C(3)-N(3)-C(2)-C(5)   | 0.53(18)    |
| C(10)-N(3)-C(2)-C(5)  | 179.01(18)  |
| C(2)-N(3)-C(3)-C(4)   | 0.15(19)    |
| C(10)-N(3)-C(3)-C(4)  | -178.25(19) |
| C(2)-N(3)-C(3)-C(11)  | 179.69(14)  |
| C(10)-N(3)-C(3)-C(11) | 1.3(3)      |
| N(3)-C(3)-C(4)-C(5)   | -0.8(2)     |
| C(11)-C(3)-C(4)-C(5)  | 179.72(16)  |
| C(6)-N(4)-C(5)-C(4)   | -179.96(18) |
| C(6)-N(4)-C(5)-C(2)   | 0.0(2)      |
| C(3)-C(4)-C(5)-N(4)   | -178.97(17) |
| C(3)-C(4)-C(5)-C(2)   | 1.06(19)    |
| N(2)-C(2)-C(5)-N(4)   | -0.9(3)     |
| N(3)-C(2)-C(5)-N(4)   | 179.05(15)  |
| N(2)-C(2)-C(5)-C(4)   | 179.06(16)  |

|                         |             |
|-------------------------|-------------|
| N(3)-C(2)-C(5)-C(4)     | -0.98(18)   |
| C(5)-N(4)-C(6)-C(7)     | -179.27(17) |
| C(5)-N(4)-C(6)-C(1)     | 0.6(2)      |
| N(2)-C(1)-C(6)-N(4)     | -0.6(3)     |
| N(1)-C(1)-C(6)-N(4)     | -179.66(15) |
| N(2)-C(1)-C(6)-C(7)     | 179.37(15)  |
| N(1)-C(1)-C(6)-C(7)     | 0.27(18)    |
| N(4)-C(6)-C(7)-C(8)     | 179.81(18)  |
| C(1)-C(6)-C(7)-C(8)     | -0.11(19)   |
| C(6)-C(7)-C(8)-N(1)     | -0.1(2)     |
| C(1)-N(1)-C(8)-C(7)     | 0.3(2)      |
| C(9)-N(1)-C(8)-C(7)     | 177.0(2)    |
| C(4)-C(3)-C(11)-C(12)   | -131.89(19) |
| N(3)-C(3)-C(11)-C(12)   | 48.6(2)     |
| C(4)-C(3)-C(11)-C(16)   | 44.5(2)     |
| N(3)-C(3)-C(11)-C(16)   | -135.01(17) |
| C(16)-C(11)-C(12)-C(13) | -0.7(3)     |
| C(3)-C(11)-C(12)-C(13)  | 175.74(16)  |
| C(11)-C(12)-C(13)-C(14) | -0.3(3)     |
| C(12)-C(13)-C(14)-C(15) | 1.2(3)      |
| C(12)-C(13)-C(14)-C(17) | -177.34(19) |
| C(13)-C(14)-C(15)-C(16) | -1.3(3)     |
| C(17)-C(14)-C(15)-C(16) | 177.31(19)  |
| C(14)-C(15)-C(16)-C(11) | 0.4(3)      |
| C(12)-C(11)-C(16)-C(15) | 0.6(3)      |
| C(3)-C(11)-C(16)-C(15)  | -175.91(16) |

---

Symmetry transformations used to generate equivalent atoms:
